# Supplementary material
Source: publisher site journal article supplement (https://www.dovepress.com/get_supplementary_file.php?f=284261.xlsx)
Supplement: Supplementary file 1 [file get_supplementary_file.php]

## Sheet: supplementary table S1_differen
supplementary table S1 Differentially Expressed Genes (DEGs) in HeyA8 cells caused by the treatment of sinomenine
Gene_id	FC(A8SH/A8con)	Log2FC(A8SH/A8con)	Pvalue	Padjust	Significant	Regulate	A8con	A8SH	A8con1	A8con2	A8con3	A8SH1	A8SH2	A8SH3	Gene name	Gene description
ENSG00000122966	0.168942	-2.5654	0	0	yes	down	39.7467	7.34667	43.24	33.65	42.35	7.73	7.72	6.59	CIT	citron rho-interacting serine/threonine kinase [Source:HGNC Symbol;Acc:HGNC:1985]
ENSG00000134690	0.0948394	-3.39837	0	0	yes	down	70.1733	6.75333	73.03	72.31	65.18	6.72	6.79	6.75	CDCA8	cell division cycle associated 8 [Source:HGNC Symbol;Acc:HGNC:14629]
ENSG00000141753	0.27983	-1.83738	0	0	yes	down	197.643	56.2433	203.27	198.51	191.15	57.72	55.42	55.59	IGFBP4	insulin like growth factor binding protein 4 [Source:HGNC Symbol;Acc:HGNC:5473]
ENSG00000013810	0.137564	-2.86183	0	0	yes	down	131.49	19.3533	135.76	128.31	130.4	20.27	20.14	17.65	TACC3	transforming acidic coiled-coil containing protein 3 [Source:HGNC Symbol;Acc:HGNC:11524]
ENSG00000161800	0.223007	-2.16484	0	0	yes	down	124.323	26.09	132.13	131.24	109.6	22.79	27.98	27.5	RACGAP1	Rac GTPase activating protein 1 [Source:HGNC Symbol;Acc:HGNC:9804]
ENSG00000044574	2.17827	1.12319	0	0	yes	up	387.763	858.973	392.06	381.53	389.7	848.47	869.94	858.51	HSPA5	heat shock protein family A (Hsp70) member 5 [Source:HGNC Symbol;Acc:HGNC:5238]
ENSG00000167553	0.328067	-1.60794	0	0	yes	down	1581.34	528.153	1647.72	1603.71	1492.6	521.65	531.99	530.82	TUBA1C	tubulin alpha 1c [Source:HGNC Symbol;Acc:HGNC:20768]
ENSG00000122861	0.336375	-1.57186	0	0	yes	down	932.607	322.123	865.26	995.62	936.94	327.76	314.15	324.46	PLAU	plasminogen activator, urokinase [Source:HGNC Symbol;Acc:HGNC:9052]
ENSG00000122952	0.135516	-2.88346	0	0	yes	down	157.513	21.01	168.66	148.42	155.46	18.69	20.49	23.85	ZWINT	ZW10 interacting kinetochore protein [Source:HGNC Symbol;Acc:HGNC:13195]
ENSG00000134057	0.138611	-2.85089	0	0	yes	down	319.197	44.29	320.32	305.91	331.36	44.49	44.31	44.07	CCNB1	cyclin B1 [Source:HGNC Symbol;Acc:HGNC:1579]
ENSG00000106991	0.300264	-1.7357	0	0	yes	down	165.847	51.0633	177.18	162.32	158.04	50.02	52.13	51.04	ENG	endoglin [Source:HGNC Symbol;Acc:HGNC:3349]
ENSG00000166851	0.0920918	-3.44078	0	0	yes	down	80.5633	7.08667	81.35	82.22	78.12	6.43	6.84	7.99	PLK1	polo like kinase 1 [Source:HGNC Symbol;Acc:HGNC:9077]
ENSG00000167601	0.293721	-1.76748	0	0	yes	down	283.647	84.21	297.98	283.13	269.83	87.09	79.09	86.45	AXL	AXL receptor tyrosine kinase [Source:HGNC Symbol;Acc:HGNC:905]
ENSG00000123416	0.209504	-2.25495	0	0	yes	down	2699.91	575.117	2865.28	2727.02	2507.44	577.77	558.86	588.72	TUBA1B	tubulin alpha 1b [Source:HGNC Symbol;Acc:HGNC:18809]
ENSG00000123485	0.114463	-3.12704	0	0	yes	down	85.8333	11.4167	86.61	86.92	83.97	13.19	11.28	9.78	HJURP	Holliday junction recognition protein [Source:HGNC Symbol;Acc:HGNC:25444]
ENSG00000111206	0.234518	-2.09223	0	0	yes	down	135.5	31.3767	139.57	137.52	129.41	32.34	29.42	32.37	FOXM1	forkhead box M1 [Source:HGNC Symbol;Acc:HGNC:3818]
ENSG00000142945	0.0955634	-3.3874	0	0	yes	down	119.3	11.73	121.38	121.52	115	11.89	11.91	11.39	KIF2C	kinesin family member 2C [Source:HGNC Symbol;Acc:HGNC:6393]
ENSG00000171848	0.0860268	-3.53907	0	0	yes	down	249.24	25.47	268.1	227.89	251.73	25.85	26.07	24.49	RRM2	ribonucleotide reductase regulatory subunit M2 [Source:HGNC Symbol;Acc:HGNC:10452]
ENSG00000113810	0.238104	-2.07034	0	0	yes	down	317.963	74.8667	314.76	308.85	330.28	73.9	76.49	74.21	SMC4	structural maintenance of chromosomes 4 [Source:HGNC Symbol;Acc:HGNC:14013]
ENSG00000164938	6.70413	2.74505	0	0	yes	up	9.02333	61.3	8.05	9.4	9.62	62.88	59.75	61.27	TP53INP1	tumor protein p53 inducible nuclear protein 1 [Source:HGNC Symbol;Acc:HGNC:18022]
ENSG00000023445	4.60917	2.20451	0	0	yes	up	12.36	54.5867	12.04	11.67	13.37	54.82	56.9	52.04	BIRC3	baculoviral IAP repeat containing 3 [Source:HGNC Symbol;Acc:HGNC:591]
ENSG00000183856	0.0959619	-3.38139	0	0	yes	down	31.6633	2.62333	33.9	32.9	28.19	2.47	2.79	2.61	IQGAP3	IQ motif containing GTPase activating protein 3 [Source:HGNC Symbol;Acc:HGNC:20669]
ENSG00000066279	0.118206	-3.08063	0	0	yes	down	31.7467	3.93	32.39	30.84	32.01	4.3	3.57	3.92	ASPM	abnormal spindle microtubule assembly [Source:HGNC Symbol;Acc:HGNC:19048]
ENSG00000024526	0.128984	-2.95473	0	0	yes	down	62.33	9	61.7	58.23	67.06	10.03	8.46	8.51	DEPDC1	DEP domain containing 1 [Source:HGNC Symbol;Acc:HGNC:22949]
ENSG00000108342	4.39699	2.13652	0	0	yes	up	48.71	210.613	45.87	51.23	49.03	209.2	219.07	203.57	CSF3	colony stimulating factor 3 [Source:HGNC Symbol;Acc:HGNC:2438]
ENSG00000175063	0.118108	-3.08182	0	0	yes	down	405.367	48.6333	418.98	401.02	396.1	52.51	44.33	49.06	UBE2C	ubiquitin conjugating enzyme E2 C [Source:HGNC Symbol;Acc:HGNC:15937]
ENSG00000120802	0.290166	-1.78505	0	0	yes	down	134.017	40.6667	130.81	132.19	139.05	41.31	41.32	39.37	TMPO	thymopoietin [Source:HGNC Symbol;Acc:HGNC:11875]
ENSG00000120708	0.292682	-1.77259	0	0	yes	down	144.887	43.5767	146.56	145.62	142.48	41.83	41.93	46.97	TGFBI	transforming growth factor beta induced [Source:HGNC Symbol;Acc:HGNC:11771]
ENSG00000117399	0.0924221	-3.43562	0	0	yes	down	284.67	26.64	291.19	284.1	278.72	27.04	26.63	26.25	CDC20	cell division cycle 20 [Source:HGNC Symbol;Acc:HGNC:1723]
ENSG00000075624	0.422767	-1.24206	0	0	yes	down	3750.35	1604.83	3847.23	3852.15	3551.66	1614.85	1591.68	1607.96	ACTB	actin beta [Source:HGNC Symbol;Acc:HGNC:132]
ENSG00000276043	0.0941326	-3.40916	0	0	yes	down	58.94	5.58667	67.53	56.11	53.18	5.41	5.65	5.7	UHRF1	ubiquitin like with PHD and ring finger domains 1 [Source:HGNC Symbol;Acc:HGNC:12556]
ENSG00000109685	0.31134	-1.68344	0	0	yes	down	98.9867	33.9333	100.97	98.09	97.9	36.25	32.12	33.43	NSD2	nuclear receptor binding SET domain protein 2 [Source:HGNC Symbol;Acc:HGNC:12766]
ENSG00000164104	0.199282	-2.32712	0	0	yes	down	458.047	92.4633	441.02	471.22	461.9	95.01	92	90.38	HMGB2	high mobility group box 2 [Source:HGNC Symbol;Acc:HGNC:5000]
ENSG00000117632	0.242308	-2.04508	0	0	yes	down	481.073	112.453	455.11	466.09	522.02	116.09	108.06	113.21	STMN1	stathmin 1 [Source:HGNC Symbol;Acc:HGNC:6510]
ENSG00000145386	0.120678	-3.05077	0	0	yes	down	78.8667	9.64333	79.34	76.07	81.19	9.66	9.4	9.87	CCNA2	cyclin A2 [Source:HGNC Symbol;Acc:HGNC:1578]
ENSG00000117724	0.135816	-2.88028	0	0	yes	down	100.4	11.58	104.44	96.7	100.06	13.15	11.3	10.29	CENPF	centromere protein F [Source:HGNC Symbol;Acc:HGNC:1857]
ENSG00000188229	0.274589	-1.86466	0	0	yes	down	1147.63	319.513	1210.59	1129.4	1102.89	317.5	309.34	331.7	TUBB4B	tubulin beta 4B class IVb [Source:HGNC Symbol;Acc:HGNC:20771]
ENSG00000186185	0.0851124	-3.55449	0	0	yes	down	27.8267	2.43	29.48	27.04	26.96	2.3	2.45	2.54	KIF18B	kinesin family member 18B [Source:HGNC Symbol;Acc:HGNC:27102]
ENSG00000010292	0.261161	-1.93699	0	0	yes	down	195.687	68.2767	192.25	200.81	194	70.47	69.07	65.29	NCAPD2	non-SMC condensin I complex subunit D2 [Source:HGNC Symbol;Acc:HGNC:24305]
ENSG00000051108	4.12671	2.04499	0	0	yes	up	69.7867	291.083	69.08	71.61	68.67	292.31	281.35	299.59	HERPUD1	homocysteine inducible ER protein with ubiquitin like domain 1 [Source:HGNC Symbol;Acc:HGNC:13744]
ENSG00000135486	0.476036	-1.07086	0	0	yes	down	1572.9	734.98	1615.94	1582.08	1520.69	731.6	746.28	727.06	HNRNPA1	heterogeneous nuclear ribonucleoprotein A1 [Source:HGNC Symbol;Acc:HGNC:5031]
ENSG00000156802	0.259123	-1.94829	0	0	yes	down	80.3233	21.1133	84.01	76.08	80.88	22.06	21.35	19.93	ATAD2	ATPase family, AAA domain containing 2 [Source:HGNC Symbol;Acc:HGNC:30123]
ENSG00000135318	0.349739	-1.51565	0	0	yes	down	374.993	131.903	370.42	374.57	379.99	125.9	137.38	132.43	NT5E	5'-nucleotidase ecto [Source:HGNC Symbol;Acc:HGNC:8021]
ENSG00000211459	3.07109	1.61875	0	0	yes	up	747.503	2335.77	742.99	739.2	760.32	2277.65	2295.81	2433.84	MT-RNR1	mitochondrially encoded 12S RNA [Source:HGNC Symbol;Acc:HGNC:7470]
ENSG00000072571	0.116692	-3.09923	0	0	yes	down	78.5067	11.0267	72.18	78.22	85.12	12.3	12.04	8.74	HMMR	hyaluronan mediated motility receptor [Source:HGNC Symbol;Acc:HGNC:5012]
ENSG00000210082	3.04391	1.60593	0	0	yes	up	3355.84	10397.9	3191.42	3423.28	3452.82	10388.8	10432	10373	MT-RNR2	mitochondrially encoded 16S RNA [Source:HGNC Symbol;Acc:HGNC:7471]
ENSG00000156970	0.113925	-3.13384	0	0	yes	down	42.45	4.72333	46.06	41.8	39.49	4.52	4.7	4.95	BUB1B	BUB1 mitotic checkpoint serine/threonine kinase B [Source:HGNC Symbol;Acc:HGNC:1149]
ENSG00000176014	0.332735	-1.58756	0	0	yes	down	1408.98	462.777	1515.54	1358.21	1353.19	460.11	460.01	468.21	TUBB6	tubulin beta 6 class V [Source:HGNC Symbol;Acc:HGNC:20776]
ENSG00000011426	0.124156	-3.00978	0	0	yes	down	166.137	20.86	172.41	158.52	167.48	21	21.37	20.21	ANLN	anillin actin binding protein [Source:HGNC Symbol;Acc:HGNC:14082]
ENSG00000088325	0.152771	-2.71056	0	0	yes	down	217.19	34.9533	219.91	214.44	217.22	35.76	33.69	35.41	TPX2	TPX2, microtubule nucleation factor [Source:HGNC Symbol;Acc:HGNC:1249]
ENSG00000198901	0.118682	-3.07483	0	0	yes	down	129.697	16.5633	130.55	130.05	128.49	19.06	13.31	17.32	PRC1	protein regulator of cytokinesis 1 [Source:HGNC Symbol;Acc:HGNC:9341]
ENSG00000170312	0.153566	-2.70307	0	0	yes	down	177.963	27.2633	177.35	164.62	191.92	26.37	27.23	28.19	CDK1	cyclin dependent kinase 1 [Source:HGNC Symbol;Acc:HGNC:1722]
ENSG00000073111	0.159319	-2.65001	0	0	yes	down	75.2633	12.4833	79.95	75.68	70.16	12.35	11.77	13.33	MCM2	minichromosome maintenance complex component 2 [Source:HGNC Symbol;Acc:HGNC:6944]
ENSG00000132780	0.327751	-1.60933	0	0	yes	down	379.363	145.433	393.33	370.59	374.17	146.02	149.04	141.24	NASP	nuclear autoantigenic sperm protein [Source:HGNC Symbol;Acc:HGNC:7644]
ENSG00000109805	0.109621	-3.18941	0	0	yes	down	62.05	7	63.82	60.33	62	6.54	7.48	6.98	NCAPG	non-SMC condensin I complex subunit G [Source:HGNC Symbol;Acc:HGNC:24304]
ENSG00000178999	0.101231	-3.30428	0	0	yes	down	158.583	16.9333	161.9	158.06	155.79	19.25	14.28	17.27	AURKB	aurora kinase B [Source:HGNC Symbol;Acc:HGNC:11390]
ENSG00000124762	2.81502	1.49315	0	0	yes	up	147.963	422.367	152.09	146.14	145.66	425.8	417.73	423.57	CDKN1A	cyclin dependent kinase inhibitor 1A [Source:HGNC Symbol;Acc:HGNC:1784]
ENSG00000169607	0.156838	-2.67265	0	0	yes	down	46.5733	7.87667	45.26	48.61	45.85	8.75	8.48	6.4	CKAP2L	cytoskeleton associated protein 2 like [Source:HGNC Symbol;Acc:HGNC:26877]
ENSG00000113368	0.125676	-2.99222	0	0	yes	down	97.6367	11.6167	99.87	96.54	96.5	10.92	12.98	10.95	LMNB1	lamin B1 [Source:HGNC Symbol;Acc:HGNC:6637]
ENSG00000169679	0.121687	-3.03875	0	0	yes	down	58.4633	7.12667	59.49	56.26	59.64	7.24	6.85	7.29	BUB1	BUB1 mitotic checkpoint serine/threonine kinase [Source:HGNC Symbol;Acc:HGNC:1148]
ENSG00000090615	2.95703	1.56415	0	0	yes	up	22.4933	66.7967	21.96	23.6	21.92	64.68	67.67	68.04	GOLGA3	golgin A3 [Source:HGNC Symbol;Acc:HGNC:4426]
ENSG00000237649	0.0983875	-3.34538	0	0	yes	down	83.7167	8.34	90.11	80	81.04	7.67	8.53	8.82	KIFC1	kinesin family member C1 [Source:HGNC Symbol;Acc:HGNC:6389]
ENSG00000176619	0.342681	-1.54506	0	0	yes	down	227.403	75.12	227.46	228.02	226.73	75.23	76.76	73.37	LMNB2	lamin B2 [Source:HGNC Symbol;Acc:HGNC:6638]
ENSG00000090889	0.110502	-3.17786	0	0	yes	down	34.9333	3.92	35.39	34.54	34.87	3.82	3.86	4.08	KIF4A	kinesin family member 4A [Source:HGNC Symbol;Acc:HGNC:13339]
ENSG00000198826	0.208789	-2.25988	0	0	yes	down	49.6767	11.3667	52.38	48.79	47.86	11.92	11.41	10.77	ARHGAP11A	Rho GTPase activating protein 11A [Source:HGNC Symbol;Acc:HGNC:15783]
ENSG00000189403	0.309632	-1.69137	0	0	yes	down	873.953	256.39	863.73	866.86	891.27	253.54	263.27	252.36	HMGB1	high mobility group box 1 [Source:HGNC Symbol;Acc:HGNC:4983]
ENSG00000138160	0.168268	-2.57117	0	0	yes	down	52.1633	8.92	52.1	50.16	54.23	9.21	8.26	9.29	KIF11	kinesin family member 11 [Source:HGNC Symbol;Acc:HGNC:6388]
ENSG00000168374	4.69184	2.23016	0	0	yes	up	319.133	1341.31	318.91	319.53	318.96	1320.01	1368.32	1335.59	ARF4	ADP ribosylation factor 4 [Source:HGNC Symbol;Acc:HGNC:655]
ENSG00000138182	0.195483	-2.35488	0	0	yes	down	36.2867	7.05333	35.44	35.55	37.87	7.38	6.98	6.8	KIF20B	kinesin family member 20B [Source:HGNC Symbol;Acc:HGNC:7212]
ENSG00000182481	0.278328	-1.84514	0	0	yes	down	355.507	100.093	369.49	351.65	345.38	99.86	99.12	101.3	KPNA2	karyopherin subunit alpha 2 [Source:HGNC Symbol;Acc:HGNC:6395]
ENSG00000138180	0.162385	-2.62251	0	0	yes	down	96.2033	15.7133	91.19	93.63	103.79	16.45	14.96	15.73	CEP55	centrosomal protein 55 [Source:HGNC Symbol;Acc:HGNC:1161]
ENSG00000112984	0.11686	-3.09714	0	0	yes	down	64.0533	7.85667	68.93	64.6	58.63	9.32	7.01	7.24	KIF20A	kinesin family member 20A [Source:HGNC Symbol;Acc:HGNC:9787]
ENSG00000138778	0.159556	-2.64786	0	0	yes	down	22.48	3.55667	22.24	23.65	21.55	3.73	3.19	3.75	CENPE	centromere protein E [Source:HGNC Symbol;Acc:HGNC:1856]
ENSG00000137807	0.104529	-3.25802	0	0	yes	down	56.8967	5.96	59.87	53.44	57.38	6.36	6.27	5.25	KIF23	kinesin family member 23 [Source:HGNC Symbol;Acc:HGNC:6392]
ENSG00000131747	0.124012	-3.01145	0	0	yes	down	202.887	25.24	201.77	203.29	203.6	26.08	24.95	24.69	TOP2A	DNA topoisomerase II alpha [Source:HGNC Symbol;Acc:HGNC:11989]
ENSG00000091409	0.330033	-1.59932	0	0	yes	down	113.69	38.9867	114.85	114.37	111.85	40.6	37.52	38.84	ITGA6	integrin subunit alpha 6 [Source:HGNC Symbol;Acc:HGNC:6142]
ENSG00000126787	0.114362	-3.12833	0	0	yes	down	67.9	7.90667	66.63	69.49	67.58	8.12	7.96	7.64	DLGAP5	DLG associated protein 5 [Source:HGNC Symbol;Acc:HGNC:16864]
ENSG00000080986	0.0956844	-3.38557	0	0	yes	down	79.6267	7.67	78.9	77.63	82.35	7.29	7.11	8.61	NDC80	NDC80, kinetochore complex component [Source:HGNC Symbol;Acc:HGNC:16909]
ENSG00000137962	0.362745	-1.46297	0	0	yes	down	86.8167	33.1933	88.87	84.43	87.15	33.5	31.89	34.19	ARHGAP29	Rho GTPase activating protein 29 [Source:HGNC Symbol;Acc:HGNC:30207]
ENSG00000196230	0.255222	-1.97018	0	0	yes	down	1202.22	311.77	1253.89	1215.19	1137.58	308.47	316.57	310.27	TUBB	tubulin beta class I [Source:HGNC Symbol;Acc:HGNC:20778]
ENSG00000104738	0.236545	-2.07981	0	0	yes	down	252.76	59.4767	251.93	265.9	240.45	50.28	49.99	78.16	MCM4	minichromosome maintenance complex component 4 [Source:HGNC Symbol;Acc:HGNC:6947]
ENSG00000106366	0.456623	-1.13093	2.97593e-304	7.43292e-302	yes	down	721.763	334.87	728.9	734.92	701.47	332.13	344.55	327.93	SERPINE1	serpin family E member 1 [Source:HGNC Symbol;Acc:HGNC:8583]
ENSG00000166508	0.210201	-2.25016	2.9449e-303	7.2668e-301	yes	down	102.413	24.6467	107.72	100.05	99.47	25.67	22.32	25.95	MCM7	minichromosome maintenance complex component 7 [Source:HGNC Symbol;Acc:HGNC:6950]
ENSG00000248323	28.2137	4.81832	5.6304e-302	1.37281e-299	yes	up	2.42333	43.58	2.92	2.53	1.82	41.52	46.91	42.31	LUCAT1	lung cancer associated transcript 1 [Source:HGNC Symbol;Acc:HGNC:48498]
ENSG00000169429	18.7938	4.23219	9.06924e-299	2.18526e-296	yes	up	29.4533	551.99	26.38	29.98	32	542.3	595.58	518.09	CXCL8	C-X-C motif chemokine ligand 8 [Source:HGNC Symbol;Acc:HGNC:6025]
ENSG00000101447	0.166187	-2.58912	4.11409e-297	9.68513e-295	yes	down	67.6967	11.4567	69.93	67.26	65.9	11.46	11.15	11.76	FAM83D	family with sequence similarity 83 member D [Source:HGNC Symbol;Acc:HGNC:16122]
ENSG00000132341	0.4234	-1.23991	2.11679e-294	4.92659e-292	yes	down	825.16	322.247	917.35	745.36	812.77	335.3	340.7	290.74	RAN	RAN, member RAS oncogene family [Source:HGNC Symbol;Acc:HGNC:9846]
ENSG00000115053	0.499231	-1.00222	6.84014e-294	1.57408e-291	yes	down	601.76	301.13	612.1	594.23	598.95	298.48	302.61	302.3	NCL	nucleolin [Source:HGNC Symbol;Acc:HGNC:7667]
ENSG00000136108	0.304033	-1.7177	1.00787e-293	2.29358e-291	yes	down	133.86	40.73	130.66	130.98	139.94	41.48	38.27	42.44	CKAP2	cytoskeleton associated protein 2 [Source:HGNC Symbol;Acc:HGNC:1990]
ENSG00000108854	0.375074	-1.41475	4.49663e-292	1.01204e-289	yes	down	178.747	52.34	180.01	176.95	179.28	54.29	48.95	53.78	SMURF2	SMAD specific E3 ubiquitin protein ligase 2 [Source:HGNC Symbol;Acc:HGNC:16809]
ENSG00000182718	0.487121	-1.03765	3.38596e-291	7.5378e-289	yes	down	2974.21	1477.46	3027.31	3008.44	2886.89	1464.92	1469.92	1497.54	ANXA2	annexin A2 [Source:HGNC Symbol;Acc:HGNC:537]
ENSG00000132182	0.225944	-2.14596	4.11329e-291	9.05853e-289	yes	down	33.3933	7.54	34.88	33.96	31.34	7.94	7.41	7.27	NUP210	nucleoporin 210 [Source:HGNC Symbol;Acc:HGNC:30052]
ENSG00000148773	0.0831025	-3.58897	3.34346e-289	7.28483e-287	yes	down	120.907	9.98	134.31	119.13	109.28	9.87	10.24	9.83	MKI67	marker of proliferation Ki-67 [Source:HGNC Symbol;Acc:HGNC:7107]
ENSG00000089685	0.146594	-2.7701	2.54702e-288	5.4911e-286	yes	down	76.08	10.7867	78.48	68.67	81.09	11.03	11.62	9.71	BIRC5	baculoviral IAP repeat containing 5 [Source:HGNC Symbol;Acc:HGNC:593]
ENSG00000285441	3.56718	1.83478	4.19091e-284	8.94105e-282	yes	up	36.4433	132.187	35.73	38.82	34.78	139.02	131.64	125.9	SOD2	superoxide dismutase 2 [Source:NCBI gene;Acc:6648]
ENSG00000119922	7.12737	2.83337	6.46939e-284	1.36598e-281	yes	up	6.60333	43.24	6.56	6.86	6.39	44.24	43.47	42.01	IFIT2	interferon induced protein with tetratricopeptide repeats 2 [Source:HGNC Symbol;Acc:HGNC:5409]
ENSG00000167900	0.133944	-2.90029	1.75077e-283	3.65894e-281	yes	down	165.4	21.1967	177.31	156.38	162.51	23.52	20.45	19.62	TK1	thymidine kinase 1 [Source:HGNC Symbol;Acc:HGNC:11830]
ENSG00000175573	3.07568	1.62091	2.11614e-280	4.37785e-278	yes	up	68.8333	157.77	68.64	70.27	67.59	162.73	150.82	159.76	C11orf68	chromosome 11 open reading frame 68 [Source:HGNC Symbol;Acc:HGNC:28801]
ENSG00000187514	0.444469	-1.16985	7.26298e-280	1.48753e-277	yes	down	1185.29	525.8	1185.75	1156.22	1213.91	519.35	534.27	523.78	PTMA	prothymosin alpha [Source:HGNC Symbol;Acc:HGNC:9623]
ENSG00000125148	0.458984	-1.12348	1.34505e-279	2.72752e-277	yes	down	16004.2	7466.61	14650.7	16679.2	16682.5	7464.32	7339.03	7596.49	MT2A	metallothionein 2A [Source:HGNC Symbol;Acc:HGNC:7406]
ENSG00000094804	0.193198	-2.37185	1.18264e-277	2.37466e-275	yes	down	79.4333	14.8733	83.36	75.6	79.34	15.67	14.34	14.61	CDC6	cell division cycle 6 [Source:HGNC Symbol;Acc:HGNC:1744]
ENSG00000121152	0.13312	-2.9092	3.41891e-277	6.79831e-275	yes	down	72.95	9.00333	76.03	72.67	70.15	10.8	7.89	8.32	NCAPH	non-SMC condensin I complex subunit H [Source:HGNC Symbol;Acc:HGNC:1112]
ENSG00000087586	0.22067	-2.18004	8.68541e-276	1.71044e-273	yes	down	102.397	24.18	102.92	98.49	105.78	24.43	23.38	24.73	AURKA	aurora kinase A [Source:HGNC Symbol;Acc:HGNC:11393]
ENSG00000138674	2.33862	1.22566	1.33123e-273	2.59665e-271	yes	up	101.127	248.137	107.19	100.57	95.62	243.98	254.05	246.38	SEC31A	SEC31 homolog A, COPII coat complex component [Source:HGNC Symbol;Acc:HGNC:17052]
ENSG00000250337	2.77759	1.47384	1.79165e-273	3.46176e-271	yes	up	18.1967	44	17.24	18.82	18.53	41.88	45.43	44.69	PURPL	p53 upregulated regulator of p53 levels [Source:HGNC Symbol;Acc:HGNC:48995]
ENSG00000114346	0.3481	-1.52243	2.14745e-273	4.11046e-271	yes	down	126.53	49.05	123.98	123.76	131.85	49.46	47.83	49.86	ECT2	epithelial cell transforming 2 [Source:HGNC Symbol;Acc:HGNC:3155]
ENSG00000140525	0.195797	-2.35257	2.03729e-272	3.8635e-270	yes	down	57.7133	9.20333	54.86	55.58	62.7	7.69	10.47	9.45	FANCI	FA complementation group I [Source:HGNC Symbol;Acc:HGNC:25568]
ENSG00000243509	0.356102	-1.48964	2.62635e-272	4.9349e-270	yes	down	533.633	193.147	509.73	539.94	551.23	188.24	194.18	197.02	TNFRSF6B	TNF receptor superfamily member 6b [Source:HGNC Symbol;Acc:HGNC:11921]
ENSG00000234741	2.57952	1.3671	1.00391e-267	1.86919e-265	yes	up	404.94	1244.17	369.86	435.21	409.75	1215.1	1248.28	1269.12	GAS5	growth arrest specific 5 [Source:HGNC Symbol;Acc:HGNC:16355]
ENSG00000092853	0.147338	-2.7628	1.42432e-262	2.62807e-260	yes	down	20.5933	3.41	22.36	20.17	19.25	2.93	3.84	3.46	CLSPN	claspin [Source:HGNC Symbol;Acc:HGNC:19715]
ENSG00000135476	0.237014	-2.07696	2.36563e-255	4.32594e-253	yes	down	33.6	9.67	32.9	34.92	32.98	9.59	9.65	9.77	ESPL1	extra spindle pole bodies like 1, separase [Source:HGNC Symbol;Acc:HGNC:16856]
ENSG00000138166	2.63027	1.39521	3.75839e-253	6.812e-251	yes	up	70.9433	188.033	69.05	73.75	70.03	189.07	186.87	188.16	DUSP5	dual specificity phosphatase 5 [Source:HGNC Symbol;Acc:HGNC:3071]
ENSG00000149503	0.228749	-2.12816	1.36609e-252	2.45429e-250	yes	down	38.4767	8.33333	40.93	36.98	37.52	8.8	8.35	7.85	INCENP	inner centromere protein [Source:HGNC Symbol;Acc:HGNC:6058]
ENSG00000163661	3.40511	1.7677	1.00556e-247	1.79087e-245	yes	up	44.05	152.32	41.94	45.9	44.31	149.24	155.95	151.77	PTX3	pentraxin 3 [Source:HGNC Symbol;Acc:HGNC:9692]
ENSG00000137812	0.173219	-2.52933	3.24286e-247	5.72561e-245	yes	down	25.5567	4.84333	26.16	23.79	26.72	4.75	4.55	5.23	KNL1	kinetochore scaffold 1 [Source:HGNC Symbol;Acc:HGNC:24054]
ENSG00000103257	0.397893	-1.32955	2.22794e-246	3.90005e-244	yes	down	176.89	70.32	186.51	176.95	167.21	71.93	68.55	70.48	SLC7A5	solute carrier family 7 member 5 [Source:HGNC Symbol;Acc:HGNC:11063]
ENSG00000170421	0.48425	-1.04618	5.68452e-245	9.86649e-243	yes	down	620.43	317.777	632.6	614.04	614.65	313.55	325.48	314.3	KRT8	keratin 8 [Source:HGNC Symbol;Acc:HGNC:6446]
ENSG00000076382	0.18166	-2.46069	6.58225e-245	1.13287e-242	yes	down	53.2933	10.1333	56.33	48.19	55.36	10.41	10.46	9.53	SPAG5	sperm associated antigen 5 [Source:HGNC Symbol;Acc:HGNC:13452]
ENSG00000168906	0.491962	-1.02338	4.19112e-242	7.1532e-240	yes	down	345.717	168.473	349.71	346.33	341.11	171.33	163.89	170.2	MAT2A	methionine adenosyltransferase 2A [Source:HGNC Symbol;Acc:HGNC:6904]
ENSG00000184661	0.159702	-2.64654	9.67059e-242	1.63689e-239	yes	down	30.3833	5.27	29.37	29.28	32.5	4.77	4.94	6.1	CDCA2	cell division cycle associated 2 [Source:HGNC Symbol;Acc:HGNC:14623]
ENSG00000075218	0.141328	-2.82288	1.09034e-239	1.83043e-237	yes	down	51.6533	7.13667	50.57	51.16	53.23	8.38	6.19	6.84	GTSE1	G2 and S-phase expressed 1 [Source:HGNC Symbol;Acc:HGNC:13698]
ENSG00000137804	0.174532	-2.51843	5.50597e-237	9.1681e-235	yes	down	122.813	22.95	130.61	119.85	117.98	22.83	20.45	25.57	NUSAP1	nucleolar and spindle associated protein 1 [Source:HGNC Symbol;Acc:HGNC:18538]
ENSG00000104419	3.05534	1.61133	1.89092e-236	3.12322e-234	yes	up	92.5167	291.73	90.44	97.28	89.83	304.25	295.29	275.65	NDRG1	N-myc downstream regulated 1 [Source:HGNC Symbol;Acc:HGNC:7679]
ENSG00000146918	0.179887	-2.47484	4.72952e-235	7.62718e-233	yes	down	34.78	6.44667	36.39	34.6	33.35	5.9	6.55	6.89	NCAPG2	non-SMC condensin II complex subunit G2 [Source:HGNC Symbol;Acc:HGNC:21904]
ENSG00000111665	0.125789	-2.99092	4.72095e-235	7.62718e-233	yes	down	112.977	7.40667	119.44	113.97	105.52	8.07	7.93	6.22	CDCA3	cell division cycle associated 3 [Source:HGNC Symbol;Acc:HGNC:14624]
ENSG00000265808	2.39889	1.26237	3.00927e-232	4.81507e-230	yes	up	34.23	82.08	33.08	34.52	35.09	82.11	82.97	81.16	SEC22B	SEC22 homolog B, vesicle trafficking protein (gene/pseudogene) [Source:HGNC Symbol;Acc:HGNC:10700]
ENSG00000166592	30.5612	4.93363	4.30064e-232	6.82802e-230	yes	up	2.02333	62.0567	1.66	2.05	2.36	60.73	61.2	64.24	RRAD	RRAD, Ras related glycolysis inhibitor and calcium channel regulator [Source:HGNC Symbol;Acc:HGNC:10446]
ENSG00000094916	0.345587	-1.53288	1.67018e-231	2.63131e-229	yes	down	34.84	12.8333	36	33.53	34.99	13.61	12.26	12.63	CBX5	chromobox 5 [Source:HGNC Symbol;Acc:HGNC:1555]
ENSG00000172667	2.40627	1.2668	4.22078e-231	6.59892e-229	yes	up	29.37	75.2067	27.63	31.8	28.68	79.82	70.92	74.88	ZMAT3	zinc finger matrin-type 3 [Source:HGNC Symbol;Acc:HGNC:29983]
ENSG00000146670	0.198695	-2.33137	8.64276e-231	1.341e-228	yes	down	62.59	12.51	64.86	59.98	62.93	12.28	12.76	12.49	CDCA5	cell division cycle associated 5 [Source:HGNC Symbol;Acc:HGNC:14626]
ENSG00000059804	3.07397	1.6201	8.70403e-230	1.34035e-227	yes	up	27.9767	85.96	26.96	29.05	27.92	88.35	88.4	81.13	SLC2A3	solute carrier family 2 member 3 [Source:HGNC Symbol;Acc:HGNC:11007]
ENSG00000112081	0.386948	-1.36979	1.146e-228	1.75158e-226	yes	down	254.21	90.2433	275.04	228.45	259.14	87.79	97.25	85.69	SRSF3	serine and arginine rich splicing factor 3 [Source:HGNC Symbol;Acc:HGNC:10785]
ENSG00000139734	0.2016	-2.31043	1.21587e-228	1.84461e-226	yes	down	27.3067	5.70333	28.24	26.58	27.1	5.78	5.73	5.6	DIAPH3	diaphanous related formin 3 [Source:HGNC Symbol;Acc:HGNC:15480]
ENSG00000101057	0.135348	-2.88525	7.89672e-225	1.18921e-222	yes	down	46.4767	6.31333	51.16	44.04	44.23	6.52	6.26	6.16	MYBL2	MYB proto-oncogene like 2 [Source:HGNC Symbol;Acc:HGNC:7548]
ENSG00000069275	0.453301	-1.14146	1.59644e-224	2.38663e-222	yes	down	105.793	48.6867	104.51	105.24	107.63	47.69	50.11	48.26	NUCKS1	nuclear casein kinase and cyclin dependent kinase substrate 1 [Source:HGNC Symbol;Acc:HGNC:29923]
ENSG00000163739	3.21552	1.68505	7.6266e-224	1.13189e-221	yes	up	173.56	563.877	164.13	179.77	176.78	540.07	600.92	550.64	CXCL1	C-X-C motif chemokine ligand 1 [Source:HGNC Symbol;Acc:HGNC:4602]
ENSG00000146278	6.37117	2.67156	1.46191e-222	2.15405e-220	yes	up	14.9367	93.65	12.04	16.52	16.25	90.59	94.9	95.46	PNRC1	proline rich nuclear receptor coactivator 1 [Source:HGNC Symbol;Acc:HGNC:17278]
ENSG00000100297	0.195757	-2.35287	1.44134e-221	2.10858e-219	yes	down	58.3467	11.7533	62.23	57.2	55.61	10.71	11.94	12.61	MCM5	minichromosome maintenance complex component 5 [Source:HGNC Symbol;Acc:HGNC:6948]
ENSG00000163507	0.217595	-2.20028	2.45965e-218	3.57277e-216	yes	down	45.5267	9.89333	47.07	42.4	47.11	9.77	9.33	10.58	CIP2A	cell proliferation regulating inhibitor of protein phosphatase 2A [Source:HGNC Symbol;Acc:HGNC:29302]
ENSG00000143476	0.162401	-2.62237	3.97935e-218	5.73951e-216	yes	down	30.4967	5.53667	33.43	29.14	28.92	4.54	7.22	4.85	DTL	denticleless E3 ubiquitin protein ligase homolog [Source:HGNC Symbol;Acc:HGNC:30288]
ENSG00000111348	0.352262	-1.50528	9.38447e-218	1.33475e-215	yes	down	297.3	105.767	302.86	303.98	285.06	106.92	104.42	105.96	ARHGDIB	Rho GDP dissociation inhibitor beta [Source:HGNC Symbol;Acc:HGNC:679]
ENSG00000171241	0.171803	-2.54117	1.06898e-217	1.50992e-215	yes	down	26.1567	4.13333	27.8	24.79	25.88	3.81	4.18	4.41	SHCBP1	SHC binding and spindle associated 1 [Source:HGNC Symbol;Acc:HGNC:29547]
ENSG00000138668	0.432431	-1.20946	9.49072e-217	1.33137e-214	yes	down	394.547	166.957	393.89	386.9	402.85	165.21	170.05	165.61	HNRNPD	heterogeneous nuclear ribonucleoprotein D [Source:HGNC Symbol;Acc:HGNC:5036]
ENSG00000130402	0.491087	-1.02595	1.47549e-215	2.05575e-213	yes	down	466.133	213.237	469.95	484.76	443.69	222.94	212.49	204.28	ACTN4	actinin alpha 4 [Source:HGNC Symbol;Acc:HGNC:166]
ENSG00000157456	0.191826	-2.38213	1.22929e-214	1.70116e-212	yes	down	100.907	18.1333	102.51	98.77	101.44	19.3	17.19	17.91	CCNB2	cyclin B2 [Source:HGNC Symbol;Acc:HGNC:1580]
ENSG00000258232	0.323008	-1.63036	3.24218e-214	4.45658e-212	yes	down	915.333	301.427	952.13	929.31	864.56	292.44	287.33	324.51	AC125611.3	novel transcript, antisense to TUBA1C
ENSG00000068489	0.234192	-2.09423	9.65923e-214	1.31887e-211	yes	down	107.173	24.8967	111.7	104.35	105.47	24.96	27.57	22.16	PRR11	proline rich 11 [Source:HGNC Symbol;Acc:HGNC:25619]
ENSG00000124207	0.406049	-1.30028	1.61613e-213	2.19205e-211	yes	down	196.077	83.8067	199.47	184.67	204.09	84.09	81.96	85.37	CSE1L	chromosome segregation 1 like [Source:HGNC Symbol;Acc:HGNC:2431]
ENSG00000136167	5.87237	2.55394	5.10776e-213	6.88237e-211	yes	up	5.63333	33.6233	5.1	6.76	5.04	32.66	33.68	34.53	LCP1	lymphocyte cytosolic protein 1 [Source:HGNC Symbol;Acc:HGNC:6528]
ENSG00000188554	2.14072	1.09809	6.61099e-213	8.84965e-211	yes	up	63.2733	138.567	62.56	64.15	63.11	144.45	137.32	133.93	NBR1	NBR1, autophagy cargo receptor [Source:HGNC Symbol;Acc:HGNC:6746]
ENSG00000143228	0.157192	-2.6694	1.75756e-212	2.33744e-210	yes	down	67.97	10.96	66.03	66.75	71.13	10.22	12.05	10.61	NUF2	NDC80 kinetochore complex component NUF2 [Source:HGNC Symbol;Acc:HGNC:14621]
ENSG00000118193	0.153949	-2.69947	1.05223e-211	1.39037e-209	yes	down	14.4833	2.27	14.44	14.68	14.33	2.55	2.19	2.07	KIF14	kinesin family member 14 [Source:HGNC Symbol;Acc:HGNC:19181]
ENSG00000175216	0.429332	-1.21983	6.23647e-210	8.18777e-208	yes	down	71.0667	31.4833	72.04	70.97	70.19	32.1	29.85	32.5	CKAP5	cytoskeleton associated protein 5 [Source:HGNC Symbol;Acc:HGNC:28959]
ENSG00000133805	5.75951	2.52595	8.28777e-209	1.08116e-206	yes	up	5.87	34.47	5.22	6.29	6.1	35.79	35.28	32.34	AMPD3	adenosine monophosphate deaminase 3 [Source:HGNC Symbol;Acc:HGNC:470]
ENSG00000100906	3.0299	1.59927	1.71701e-208	2.2257e-206	yes	up	63.3733	195.357	61.99	66.21	61.92	197.45	197.76	190.86	NFKBIA	NFKB inhibitor alpha [Source:HGNC Symbol;Acc:HGNC:7797]
ENSG00000112118	0.251237	-1.99288	1.94348e-208	2.50342e-206	yes	down	81.4067	20.4767	86.45	80.3	77.47	20.74	20.59	20.1	MCM3	minichromosome maintenance complex component 3 [Source:HGNC Symbol;Acc:HGNC:6945]
ENSG00000136824	0.295494	-1.7588	2.56252e-208	3.28019e-206	yes	down	36.02	10.43	35.39	35.45	37.22	10.22	11.14	9.93	SMC2	structural maintenance of chromosomes 2 [Source:HGNC Symbol;Acc:HGNC:14011]
ENSG00000104824	0.429753	-1.21842	2.6998e-208	3.43445e-206	yes	down	253.8	108.17	254.92	254.53	251.95	109.88	104.45	110.18	HNRNPL	heterogeneous nuclear ribonucleoprotein L [Source:HGNC Symbol;Acc:HGNC:5045]
ENSG00000065150	0.49078	-1.02685	1.0242e-206	1.29485e-204	yes	down	134.143	68.7333	138.04	129.31	135.08	69.61	67.99	68.6	IPO5	importin 5 [Source:HGNC Symbol;Acc:HGNC:6402]
ENSG00000188486	0.252426	-1.98606	9.23463e-206	1.16033e-203	yes	down	143.173	37.32	146.99	132.06	150.47	35.81	37.67	38.48	H2AFX	H2A histone family member X [Source:HGNC Symbol;Acc:HGNC:4739]
ENSG00000123473	0.232659	-2.10371	1.18116e-204	1.47508e-202	yes	down	34.67	7.87667	35.14	34.55	34.32	8.66	7.8	7.17	STIL	STIL, centriolar assembly protein [Source:HGNC Symbol;Acc:HGNC:10879]
ENSG00000102804	2.41521	1.27215	5.29439e-204	6.57179e-202	yes	up	53.8933	130.467	51.46	53.55	56.67	130.79	129.17	131.44	TSC22D1	TSC22 domain family member 1 [Source:HGNC Symbol;Acc:HGNC:16826]
ENSG00000147274	0.381082	-1.39183	4.43483e-203	5.47167e-201	yes	down	193.117	77.9867	198.84	197.46	183.05	75.36	81.78	76.82	RBMX	RNA binding motif protein X-linked [Source:HGNC Symbol;Acc:HGNC:9910]
ENSG00000150991	2.2562	1.1739	7.15213e-203	8.77143e-201	yes	up	1626.15	3769.75	1647.47	1724.26	1506.71	3733.83	3731.49	3843.94	UBC	ubiquitin C [Source:HGNC Symbol;Acc:HGNC:12468]
ENSG00000145901	2.9152	1.54359	7.25813e-203	8.84844e-201	yes	up	97.8967	323.22	86.64	105.15	101.9	323.38	320.74	325.54	TNIP1	TNFAIP3 interacting protein 1 [Source:HGNC Symbol;Acc:HGNC:16903]
ENSG00000270647	0.360238	-1.47298	7.25125e-202	8.78774e-200	yes	down	180	65.75	182.69	176.18	181.13	66.82	64.05	66.38	TAF15	TATA-box binding protein associated factor 15 [Source:HGNC Symbol;Acc:HGNC:11547]
ENSG00000130816	0.323265	-1.62921	8.84281e-202	1.06535e-199	yes	down	98.6933	31.3267	108.79	93.01	94.28	32.08	30.85	31.05	DNMT1	DNA methyltransferase 1 [Source:HGNC Symbol;Acc:HGNC:2976]
ENSG00000173207	0.259539	-1.94598	1.18274e-201	1.41659e-199	yes	down	280.75	74.6567	281.41	274.08	286.76	73.23	74.57	76.17	CKS1B	CDC28 protein kinase regulatory subunit 1B [Source:HGNC Symbol;Acc:HGNC:19083]
ENSG00000164109	0.221204	-2.17655	3.48942e-200	4.15505e-198	yes	down	64.0467	13.6667	66.05	58.29	67.8	14.7	13.06	13.24	MAD2L1	mitotic arrest deficient 2 like 1 [Source:HGNC Symbol;Acc:HGNC:6763]
ENSG00000285744	6.31717	2.65928	4.04337e-200	4.78683e-198	yes	up	1.26	6.96667	1.07	1.33	1.38	6.92	7.41	6.57	AC083837.1	novel transcript
ENSG00000092201	0.437149	-1.1938	5.35069e-200	6.29813e-198	yes	down	121.047	55.6467	123.2	121.97	117.97	54.6	59.02	53.32	SUPT16H	SPT16 homolog, facilitates chromatin remodeling subunit [Source:HGNC Symbol;Acc:HGNC:11465]
ENSG00000184445	0.280736	-1.83272	1.6611e-199	1.94406e-197	yes	down	37.1667	11.7033	37.29	37.34	36.87	11.66	12.39	11.06	KNTC1	kinetochore associated 1 [Source:HGNC Symbol;Acc:HGNC:17255]
ENSG00000167325	0.29872	-1.74313	3.71647e-199	4.32483e-197	yes	down	81.0733	24.4	85.73	76.92	80.57	24.77	23.04	25.39	RRM1	ribonucleotide reductase catalytic subunit M1 [Source:HGNC Symbol;Acc:HGNC:10451]
ENSG00000184371	3.33313	1.73688	5.55962e-199	6.43314e-197	yes	up	16.01	52.3133	15.17	15.01	17.85	52.66	52.99	51.29	CSF1	colony stimulating factor 1 [Source:HGNC Symbol;Acc:HGNC:2432]
ENSG00000119681	0.299481	-1.73946	7.12034e-199	8.19279e-197	yes	down	30.3633	9.21667	30.3	31.62	29.17	9.7	8.75	9.2	LTBP2	latent transforming growth factor beta binding protein 2 [Source:HGNC Symbol;Acc:HGNC:6715]
ENSG00000175061	2.03193	1.02285	6.30215e-197	7.13118e-195	yes	up	679.733	1467.29	651.07	679.02	709.11	1464.25	1483.73	1453.89	SNHG29	small nucleolar RNA host gene 29 [Source:HGNC Symbol;Acc:HGNC:28619]
ENSG00000228716	0.256052	-1.96549	2.07444e-193	2.33443e-191	yes	down	67.15	15.7167	71.97	57.86	71.62	15.99	15.13	16.03	DHFR	dihydrofolate reductase [Source:HGNC Symbol;Acc:HGNC:2861]
ENSG00000144554	0.189095	-2.40282	5.54987e-193	6.2113e-191	yes	down	34.88	8.91	40.01	34.87	29.76	6.62	11.65	8.46	FANCD2	FA complementation group D2 [Source:HGNC Symbol;Acc:HGNC:3585]
ENSG00000136527	0.469433	-1.09101	4.55985e-191	5.07556e-189	yes	down	257.41	105.83	256.52	255.05	260.66	101.95	106.85	108.69	TRA2B	transformer 2 beta homolog [Source:HGNC Symbol;Acc:HGNC:10781]
ENSG00000137310	0.171925	-2.54014	2.35398e-190	2.60605e-188	yes	down	42.3167	7.32333	45.16	41.74	40.05	7.82	6.33	7.82	TCF19	transcription factor 19 [Source:HGNC Symbol;Acc:HGNC:11629]
ENSG00000161547	0.412659	-1.27698	3.49149e-190	3.84458e-188	yes	down	324.17	130.707	344.74	315.73	312.04	140.83	119.67	131.62	SRSF2	serine and arginine rich splicing factor 2 [Source:HGNC Symbol;Acc:HGNC:10783]
ENSG00000162607	0.331001	-1.59509	2.36623e-188	2.59159e-186	yes	down	80.7633	27.1067	78.05	77.87	86.37	26.54	28	26.78	USP1	ubiquitin specific peptidase 1 [Source:HGNC Symbol;Acc:HGNC:12607]
ENSG00000154319	0.350008	-1.51454	6.44532e-188	7.02163e-186	yes	down	66.1267	23.47	65.73	68.92	63.73	22.61	23.59	24.21	FAM167A	family with sequence similarity 167 member A [Source:HGNC Symbol;Acc:HGNC:15549]
ENSG00000253522	11.4347	3.51535	2.66743e-187	2.87535e-185	yes	up	3.06667	35.2267	2.54	3.28	3.38	34.57	37.15	33.96	MIR3142HG	MIR3142 host gene [Source:HGNC Symbol;Acc:HGNC:51944]
ENSG00000164741	0.462978	-1.11098	1.29556e-185	1.38923e-183	yes	down	107.95	48.0833	110.94	106.19	106.72	47.68	49.17	47.4	DLC1	DLC1 Rho GTPase activating protein [Source:HGNC Symbol;Acc:HGNC:2897]
ENSG00000118816	2.33869	1.2257	1.48945e-184	1.58882e-182	yes	up	102.34	241.06	96.8	103.76	106.46	243.03	240.45	239.7	CCNI	cyclin I [Source:HGNC Symbol;Acc:HGNC:1595]
ENSG00000164032	0.45685	-1.13021	2.14249e-184	2.2736e-182	yes	down	868.187	403.05	888.7	853.66	862.2	407.29	411.33	390.53	H2AFZ	H2A histone family member Z [Source:HGNC Symbol;Acc:HGNC:4741]
ENSG00000162063	0.131937	-2.92208	6.1334e-184	6.47516e-182	yes	down	19.5933	2.61667	20.65	19.06	19.07	2.72	2.53	2.6	CCNF	cyclin F [Source:HGNC Symbol;Acc:HGNC:1591]
ENSG00000111602	0.253655	-1.97906	1.98127e-183	2.08094e-181	yes	down	32.7267	8.75333	35.06	32.76	30.36	8.99	9.19	8.08	TIMELESS	timeless circadian regulator [Source:HGNC Symbol;Acc:HGNC:11813]
ENSG00000117650	0.155895	-2.68135	4.81903e-183	5.03564e-181	yes	down	51.4933	7.67333	50.65	52.11	51.72	8.14	6.94	7.94	NEK2	NIMA related kinase 2 [Source:HGNC Symbol;Acc:HGNC:7745]
ENSG00000176890	0.299717	-1.73833	6.02342e-183	6.26222e-181	yes	down	181.163	54	190.58	170.42	182.49	52.08	59.32	50.6	TYMS	thymidylate synthetase [Source:HGNC Symbol;Acc:HGNC:12441]
ENSG00000178202	0.209876	-2.25239	2.3165e-182	2.38413e-180	yes	down	32.0667	7.04333	33.99	30.43	31.78	7.95	6.51	6.67	KDELC2	KDEL motif containing 2 [Source:HGNC Symbol;Acc:HGNC:28496]
ENSG00000167772	10.6549	3.41344	1.01818e-179	1.03748e-177	yes	up	4.28667	43.8933	4.42	4.23	4.21	45.67	40.33	45.68	ANGPTL4	angiopoietin like 4 [Source:HGNC Symbol;Acc:HGNC:16039]
ENSG00000149948	0.424206	-1.23716	3.48191e-179	3.53034e-177	yes	down	108.657	47.1167	111.18	105.2	109.59	45.54	45.46	50.35	HMGA2	high mobility group AT-hook 2 [Source:HGNC Symbol;Acc:HGNC:5009]
ENSG00000111247	0.180914	-2.46662	4.58438e-179	4.62526e-177	yes	down	72.12	13.5167	73.77	68.06	74.53	15.63	13.8	11.12	RAD51AP1	RAD51 associated protein 1 [Source:HGNC Symbol;Acc:HGNC:16956]
ENSG00000165480	0.172199	-2.53785	9.3099e-179	9.34687e-177	yes	down	34.92	6.50667	34	34.57	36.19	6.76	6.01	6.75	SKA3	spindle and kinetochore associated complex subunit 3 [Source:HGNC Symbol;Acc:HGNC:20262]
ENSG00000041982	0.377513	-1.4054	8.96151e-175	8.9532e-173	yes	down	95.8367	36.4	88.79	101.23	97.49	37.15	35.8	36.25	TNC	tenascin C [Source:HGNC Symbol;Acc:HGNC:5318]
ENSG00000143799	0.425924	-1.23133	2.21431e-173	2.20152e-171	yes	down	90.9	39.02	94.32	89.36	89.02	39.17	38.68	39.21	PARP1	poly(ADP-ribose) polymerase 1 [Source:HGNC Symbol;Acc:HGNC:270]
ENSG00000085999	0.118179	-3.08096	2.73857e-173	2.7096e-171	yes	down	29.56	3.64333	32.02	29.9	26.76	4.58	2.97	3.38	RAD54L	RAD54 like [Source:HGNC Symbol;Acc:HGNC:9826]
ENSG00000163808	0.150407	-2.73306	1.00669e-172	9.91248e-171	yes	down	26.94	4.31333	25.97	29.98	24.87	3.7	4.91	4.33	KIF15	kinesin family member 15 [Source:HGNC Symbol;Acc:HGNC:17273]
ENSG00000142871	0.484495	-1.04545	2.20892e-172	2.16463e-170	yes	down	867.98	423.81	835	865.68	903.26	425.4	402.66	443.37	CCN1	cellular communication network factor 1 [Source:HGNC Symbol;Acc:HGNC:2654]
ENSG00000142731	0.14707	-2.76542	6.70754e-172	6.54177e-170	yes	down	26.4333	4.35333	27.2	23.77	28.33	4.27	4.2	4.59	PLK4	polo like kinase 4 [Source:HGNC Symbol;Acc:HGNC:11397]
ENSG00000198830	0.463567	-1.10915	5.35226e-171	5.19525e-169	yes	down	365.553	179.9	379.74	341.98	374.94	185.59	176.57	177.54	HMGN2	high mobility group nucleosomal binding domain 2 [Source:HGNC Symbol;Acc:HGNC:4986]
ENSG00000071539	0.156409	-2.67661	4.8055e-170	4.64252e-168	yes	down	45.5333	7.43333	49.61	41.12	45.87	7.28	8.77	6.25	TRIP13	thyroid hormone receptor interactor 13 [Source:HGNC Symbol;Acc:HGNC:12307]
ENSG00000138411	3.39518	1.76349	8.7275e-170	8.39192e-168	yes	up	10.6133	38.31	11.19	10.9	9.75	38.85	39.13	36.95	HECW2	HECT, C2 and WW domain containing E3 ubiquitin protein ligase 2 [Source:HGNC Symbol;Acc:HGNC:29853]
ENSG00000077150	2.41295	1.2708	7.68416e-169	7.35417e-167	yes	up	47.9967	125.63	48.33	48.6	47.06	123.58	129.22	124.09	NFKB2	nuclear factor kappa B subunit 2 [Source:HGNC Symbol;Acc:HGNC:7795]
ENSG00000095002	0.314527	-1.66875	3.00941e-168	2.86677e-166	yes	down	63.1633	19.9133	65.96	59.64	63.89	20.88	18.71	20.15	MSH2	mutS homolog 2 [Source:HGNC Symbol;Acc:HGNC:7325]
ENSG00000237596	9.50332	3.24843	3.06685e-168	2.90797e-166	yes	up	2.31333	22.7433	2.41	2.21	2.32	20.1	25.45	22.68	AL138828.1	novel transcript
ENSG00000222009	5.35256	2.42023	2.79097e-167	2.6221e-165	yes	up	7.63	32.32	6.89	8.15	7.85	30.24	30.91	35.81	BTBD19	BTB domain containing 19 [Source:HGNC Symbol;Acc:HGNC:27145]
ENSG00000112742	0.200781	-2.31631	4.91276e-166	4.59444e-164	yes	down	41.26	7.76	42.99	40.13	40.66	7.71	7.29	8.28	TTK	TTK protein kinase [Source:HGNC Symbol;Acc:HGNC:12401]
ENSG00000040275	0.312831	-1.67654	1.71924e-164	1.60054e-162	yes	down	80.3167	25.95	80.3	81.76	78.89	23.24	25.58	29.03	SPDL1	spindle apparatus coiled-coil protein 1 [Source:HGNC Symbol;Acc:HGNC:26010]
ENSG00000099901	0.308796	-1.69528	6.85835e-162	6.35592e-160	yes	down	256.47	80.7267	249.55	253.31	266.55	83.89	79.2	79.09	RANBP1	RAN binding protein 1 [Source:HGNC Symbol;Acc:HGNC:9847]
ENSG00000170540	0.472265	-1.08233	2.11749e-161	1.95353e-159	yes	down	222.083	106.057	220.61	217.03	228.61	102.98	106.23	108.96	ARL6IP1	ADP ribosylation factor like GTPase 6 interacting protein 1 [Source:HGNC Symbol;Acc:HGNC:697]
ENSG00000151725	0.239001	-2.06491	9.48289e-160	8.67049e-158	yes	down	71.07	16.4833	73.03	69.44	70.74	15.38	16.41	17.66	CENPU	centromere protein U [Source:HGNC Symbol;Acc:HGNC:21348]
ENSG00000164649	0.390033	-1.35833	4.11381e-159	3.74467e-157	yes	down	88.89	35.76	88.43	88.02	90.22	35.08	35.77	36.43	CDCA7L	cell division cycle associated 7 like [Source:HGNC Symbol;Acc:HGNC:30777]
ENSG00000110048	2.25512	1.1732	5.95652e-159	5.39803e-157	yes	up	27.3433	61.9267	28.43	26.64	26.96	62.3	61.75	61.73	OSBP	oxysterol binding protein [Source:HGNC Symbol;Acc:HGNC:8503]
ENSG00000161011	2.12374	1.08661	3.2999e-158	2.97733e-156	yes	up	1279.6	2733.11	1401.46	1187.4	1249.94	2743.58	2735.23	2720.51	SQSTM1	sequestosome 1 [Source:HGNC Symbol;Acc:HGNC:11280]
ENSG00000258366	0.279451	-1.83933	6.34182e-158	5.69679e-156	yes	down	25.71	8.76	26.06	25.07	26	8.04	8.43	9.81	RTEL1	regulator of telomere elongation helicase 1 [Source:HGNC Symbol;Acc:HGNC:15888]
ENSG00000177084	0.217787	-2.19901	1.13692e-157	1.01682e-155	yes	down	26.5367	6.56667	32.43	23.53	23.65	7.23	6.3	6.17	POLE	DNA polymerase epsilon, catalytic subunit [Source:HGNC Symbol;Acc:HGNC:9177]
ENSG00000165304	0.235828	-2.08419	2.45373e-157	2.18499e-155	yes	down	59.8033	14.5967	61.84	57.2	60.37	13.89	13.97	15.93	MELK	maternal embryonic leucine zipper kinase [Source:HGNC Symbol;Acc:HGNC:16870]
ENSG00000112029	0.189391	-2.40056	5.0442e-157	4.47231e-155	yes	down	46.1067	8.59	45.21	44.56	48.55	9.18	8.08	8.51	FBXO5	F-box protein 5 [Source:HGNC Symbol;Acc:HGNC:13584]
ENSG00000171658	6.04154	2.59492	3.06781e-156	2.70826e-154	yes	up	12.7967	49.53	16.75	11.06	10.58	46.95	42.3	59.34	NMRAL2P	NmrA like redox sensor 2, pseudogene [Source:HGNC Symbol;Acc:HGNC:52332]
ENSG00000100526	0.172069	-2.53894	3.23483e-156	2.84346e-154	yes	down	135.613	25.9433	132.91	134.05	139.88	24.93	25.61	27.29	CDKN3	cyclin dependent kinase inhibitor 3 [Source:HGNC Symbol;Acc:HGNC:1791]
ENSG00000102265	2.69252	1.42895	4.48367e-156	3.92436e-154	yes	up	154.86	429.99	158.08	161.04	145.46	429.53	439.53	420.91	TIMP1	TIMP metallopeptidase inhibitor 1 [Source:HGNC Symbol;Acc:HGNC:11820]
ENSG00000257732	8.68261	3.11813	4.63613e-155	4.04054e-153	yes	up	4.2	39.3833	4.8	3.28	4.52	37.65	38.14	42.36	AC089983.1	novel transcript, antisense to TXNRD1
ENSG00000115875	0.373273	-1.4217	1.70152e-154	1.47665e-152	yes	down	161.903	53.45	167.72	157.55	160.44	54.3	55.93	50.12	SRSF7	serine and arginine rich splicing factor 7 [Source:HGNC Symbol;Acc:HGNC:10789]
ENSG00000073605	6.30191	2.65579	2.90924e-154	2.5141e-152	yes	up	6.65333	38.6067	6.46	8.53	4.97	39.07	36.38	40.37	GSDMB	gasdermin B [Source:HGNC Symbol;Acc:HGNC:23690]
ENSG00000091986	0.348075	-1.52253	4.34933e-154	3.7428e-152	yes	down	83.67	27.97	90.27	85.14	75.6	26.25	29.22	28.44	CCDC80	coiled-coil domain containing 80 [Source:HGNC Symbol;Acc:HGNC:30649]
ENSG00000065328	0.124193	-3.00935	1.02386e-153	8.73737e-152	yes	down	19.6167	2.38	22.48	18.46	17.91	2.4	2.31	2.43	MCM10	minichromosome maintenance 10 replication initiation factor [Source:HGNC Symbol;Acc:HGNC:18043]
ENSG00000124795	0.427538	-1.22587	1.07812e-153	9.1622e-152	yes	down	180.3	75.9367	172.23	175.02	193.65	76.85	76.3	74.66	DEK	DEK proto-oncogene [Source:HGNC Symbol;Acc:HGNC:2768]
ENSG00000171793	0.296637	-1.75323	2.90941e-153	2.45216e-151	yes	down	96.7533	30.0667	106.32	98.5	85.44	28.42	30.54	31.24	CTPS1	CTP synthase 1 [Source:HGNC Symbol;Acc:HGNC:2519]
ENSG00000170779	0.389227	-1.36132	4.15432e-152	3.45872e-150	yes	down	92.8167	35.1867	93.61	89.05	95.79	34.52	34.76	36.28	CDCA4	cell division cycle associated 4 [Source:HGNC Symbol;Acc:HGNC:14625]
ENSG00000166340	2.04321	1.03084	4.97101e-152	4.12192e-150	yes	up	81.3467	172.967	82.49	83.55	78	173.45	169	176.45	TPP1	tripeptidyl peptidase 1 [Source:HGNC Symbol;Acc:HGNC:2073]
ENSG00000168496	0.31481	-1.66745	1.08996e-151	9.00138e-150	yes	down	123.98	39.4967	136.48	116.22	119.24	39.41	40.73	38.35	FEN1	flap structure-specific endonuclease 1 [Source:HGNC Symbol;Acc:HGNC:3650]
ENSG00000119917	3.8097	1.92968	3.97566e-150	3.2701e-148	yes	up	12.9267	49.89	13.06	12.29	13.43	48.47	50.08	51.12	IFIT3	interferon induced protein with tetratricopeptide repeats 3 [Source:HGNC Symbol;Acc:HGNC:5411]
ENSG00000102384	0.149757	-2.73931	5.86015e-150	4.80087e-148	yes	down	29.0033	3.68667	28.54	27.33	31.14	4.37	3.14	3.55	CENPI	centromere protein I [Source:HGNC Symbol;Acc:HGNC:3968]
ENSG00000112096	3.16483	1.66213	6.72861e-150	5.49038e-148	yes	up	53.8033	161.463	52.34	55.88	53.19	149.33	169.94	165.12	SOD2	superoxide dismutase 2 [Source:HGNC Symbol;Acc:HGNC:11180]
ENSG00000175197	4.06358	2.02275	1.01716e-149	8.26684e-148	yes	up	48.1333	199.113	43.75	53.88	46.77	203.89	204.43	189.02	DDIT3	DNA damage inducible transcript 3 [Source:HGNC Symbol;Acc:HGNC:2726]
ENSG00000198961	2.09447	1.06659	8.72538e-148	7.03561e-146	yes	up	52.38	112.317	49.61	53.81	53.72	112.76	112.7	111.49	PJA2	praja ring finger ubiquitin ligase 2 [Source:HGNC Symbol;Acc:HGNC:17481]
ENSG00000187741	0.157247	-2.6689	9.12633e-148	7.33006e-146	yes	down	42.2067	6.41333	47.37	41.19	38.06	5.65	6.64	6.95	FANCA	FA complementation group A [Source:HGNC Symbol;Acc:HGNC:3582]
ENSG00000079616	0.222478	-2.16826	1.2415e-147	9.89385e-146	yes	down	53.1433	12.6233	56.68	51.86	50.89	12.22	12.28	13.37	KIF22	kinesin family member 22 [Source:HGNC Symbol;Acc:HGNC:6391]
ENSG00000089280	0.457944	-1.12676	1.36321e-147	1.08216e-145	yes	down	496.343	214.4	524.41	482.47	482.15	217.24	220.13	205.83	FUS	FUS RNA binding protein [Source:HGNC Symbol;Acc:HGNC:4010]
ENSG00000198743	2.6524	1.4073	8.86861e-147	7.01305e-145	yes	up	6.61333	17.7933	6.65	6.28	6.91	18.19	17.21	17.98	SLC5A3	solute carrier family 5 member 3 [Source:HGNC Symbol;Acc:HGNC:11038]
ENSG00000125944	0.480845	-1.05635	1.15479e-146	9.09662e-145	yes	down	183.193	85.8267	186.46	178.41	184.71	86.02	82.86	88.6	HNRNPR	heterogeneous nuclear ribonucleoprotein R [Source:HGNC Symbol;Acc:HGNC:5047]
ENSG00000137965	4.45458	2.15529	1.18421e-146	9.29266e-145	yes	up	14.0467	55.29	12.92	14.11	15.11	51.78	55.48	58.61	IFI44	interferon induced protein 44 [Source:HGNC Symbol;Acc:HGNC:16938]
ENSG00000168078	0.146111	-2.77486	3.28523e-146	2.56812e-144	yes	down	52.65	7.82	55.22	45.88	56.85	8.66	7.53	7.27	PBK	PDZ binding kinase [Source:HGNC Symbol;Acc:HGNC:18282]
ENSG00000163874	4.676	2.22528	3.76887e-146	2.93499e-144	yes	up	10.9967	49.0333	9.12	11.9	11.97	51.26	47.19	48.65	ZC3H12A	zinc finger CCCH-type containing 12A [Source:HGNC Symbol;Acc:HGNC:26259]
ENSG00000149136	0.465363	-1.10357	3.78723e-146	2.93812e-144	yes	down	170.437	77.3167	169.95	176.06	165.3	73.38	81.52	77.05	SSRP1	structure specific recognition protein 1 [Source:HGNC Symbol;Acc:HGNC:11327]
ENSG00000054654	0.376532	-1.40916	8.41365e-146	6.50264e-144	yes	down	24.1	10.1233	26.68	24.35	21.27	9.35	12.55	8.47	SYNE2	spectrin repeat containing nuclear envelope protein 2 [Source:HGNC Symbol;Acc:HGNC:17084]
ENSG00000100647	3.20716	1.68129	1.71181e-145	1.31803e-143	yes	up	7.29333	24.0533	7.09	7.46	7.33	23.78	25.07	23.31	SUSD6	sushi domain containing 6 [Source:HGNC Symbol;Acc:HGNC:19956]
ENSG00000100714	0.371255	-1.42952	1.80711e-145	1.38619e-143	yes	down	119.407	46.32	130.82	112.75	114.65	44.6	48.01	46.35	MTHFD1	methylenetetrahydrofolate dehydrogenase, cyclohydrolase and formyltetrahydrofolate synthetase 1 [Source:HGNC Symbol;Acc:HGNC:7432]
ENSG00000134871	0.49784	-1.00625	1.24433e-144	9.50937e-143	yes	down	71.9833	35.98	74.85	70.86	70.24	36.64	34.61	36.69	COL4A2	collagen type IV alpha 2 chain [Source:HGNC Symbol;Acc:HGNC:2203]
ENSG00000105011	0.199669	-2.32431	3.51515e-142	2.66644e-140	yes	down	64.7633	13.0433	70.65	61.55	62.09	12.13	13.65	13.35	ASF1B	anti-silencing function 1B histone chaperone [Source:HGNC Symbol;Acc:HGNC:20996]
ENSG00000105968	0.455781	-1.13359	4.44549e-142	3.35971e-140	yes	down	292.737	123.563	291.77	303.9	282.54	128.24	124.13	118.32	H2AFV	H2A histone family member V [Source:HGNC Symbol;Acc:HGNC:20664]
ENSG00000135446	0.438136	-1.19055	2.19619e-140	1.65368e-138	yes	down	246.9	104.63	263.95	243.89	232.86	101.15	105.15	107.59	CDK4	cyclin dependent kinase 4 [Source:HGNC Symbol;Acc:HGNC:1773]
ENSG00000133119	0.194757	-2.36026	2.4987e-140	1.87457e-138	yes	down	43.6533	8.81	48.28	42.28	40.4	8.44	8.65	9.34	RFC3	replication factor C subunit 3 [Source:HGNC Symbol;Acc:HGNC:9971]
ENSG00000093009	0.127765	-2.96844	1.43891e-139	1.07556e-137	yes	down	38.76	4.64667	40.24	38.36	37.68	4.82	4.7	4.42	CDC45	cell division cycle 45 [Source:HGNC Symbol;Acc:HGNC:1739]
ENSG00000048392	2.3345	1.22312	7.07971e-139	5.27271e-137	yes	up	75.5767	189.77	68.9	75.82	82.01	194.8	187.76	186.75	RRM2B	ribonucleotide reductase regulatory TP53 inducible subunit M2B [Source:HGNC Symbol;Acc:HGNC:17296]
ENSG00000083223	2.23623	1.16107	9.25214e-139	6.86569e-137	yes	up	30.32	71.8467	29.77	30.65	30.54	71.98	72.15	71.41	TUT7	terminal uridylyl transferase 7 [Source:HGNC Symbol;Acc:HGNC:25817]
ENSG00000010818	2.12503	1.08749	7.37227e-138	5.45095e-136	yes	up	14.2733	28.8333	13.21	13.59	16.02	29.04	28.93	28.53	HIVEP2	human immunodeficiency virus type I enhancer binding protein 2 [Source:HGNC Symbol;Acc:HGNC:4921]
ENSG00000131389	2.19541	1.13449	8.30397e-138	6.11775e-136	yes	up	32.3767	69.6	35.84	31.66	29.63	69.17	69.87	69.76	SLC6A6	solute carrier family 6 member 6 [Source:HGNC Symbol;Acc:HGNC:11052]
ENSG00000198563	0.429258	-1.22008	9.04715e-138	6.64139e-136	yes	down	214.987	89.9567	225.99	216.12	202.85	92.38	93.2	84.29	DDX39B	DExD-box helicase 39B [Source:HGNC Symbol;Acc:HGNC:13917]
ENSG00000101412	0.154831	-2.69124	1.67948e-137	1.22848e-135	yes	down	33.4567	5.28	38.13	31.18	31.06	5.45	5.1	5.29	E2F1	E2F transcription factor 1 [Source:HGNC Symbol;Acc:HGNC:3113]
ENSG00000013297	0.486867	-1.0384	5.37831e-137	3.92004e-135	yes	down	215.567	106.45	222.53	207.3	216.87	106.07	108.07	105.21	CLDN11	claudin 11 [Source:HGNC Symbol;Acc:HGNC:8514]
ENSG00000283445	2.39781	1.26172	6.26671e-137	4.55137e-135	yes	up	31.1967	82.5067	33.55	34.42	25.62	83.91	88.06	75.55	AL136985.3	novel transcript
ENSG00000128050	0.417019	-1.26182	1.09562e-136	7.90123e-135	yes	down	120.543	47.93	127.28	117.47	116.88	47.72	44.54	51.53	PAICS	phosphoribosylaminoimidazole carboxylase and phosphoribosylaminoimidazolesuccinocarboxamide synthase [Source:HGNC Symbol;Acc:HGNC:8587]
ENSG00000142230	0.467938	-1.09561	4.21172e-136	3.02667e-134	yes	down	185.893	87.4933	190.79	176.24	190.65	85.36	92.87	84.25	SAE1	SUMO1 activating enzyme subunit 1 [Source:HGNC Symbol;Acc:HGNC:30660]
ENSG00000171617	0.468943	-1.09252	3.08354e-135	2.20818e-133	yes	down	69.0933	32.8467	71.92	69.67	65.69	33.52	31.61	33.41	ENC1	ectodermal-neural cortex 1 [Source:HGNC Symbol;Acc:HGNC:3345]
ENSG00000132507	0.499267	-1.00212	6.12076e-135	4.36792e-133	yes	down	753.137	387.043	786.81	728.42	744.18	385.8	391.92	383.41	EIF5A	eukaryotic translation initiation factor 5A [Source:HGNC Symbol;Acc:HGNC:3300]
ENSG00000163683	3.89125	1.96023	3.30412e-134	2.34158e-132	yes	up	8.75333	26.49	7.7	8.49	10.07	26.14	25.77	27.56	SMIM14	small integral membrane protein 14 [Source:HGNC Symbol;Acc:HGNC:27321]
ENSG00000102317	0.283286	-1.81967	4.05835e-134	2.86617e-132	yes	down	100.617	26.5967	108.22	89.72	103.91	24.52	29.56	25.71	RBM3	RNA binding motif protein 3 [Source:HGNC Symbol;Acc:HGNC:9900]
ENSG00000023608	0.354189	-1.49741	5.47233e-134	3.85151e-132	yes	down	70.6433	25.4067	69.27	69.14	73.52	24.77	26.83	24.62	SNAPC1	small nuclear RNA activating complex polypeptide 1 [Source:HGNC Symbol;Acc:HGNC:11134]
ENSG00000175305	0.119504	-3.06487	2.06247e-133	1.44169e-131	yes	down	29.1433	4.32667	30.86	27.27	29.3	4.17	5.44	3.37	CCNE2	cyclin E2 [Source:HGNC Symbol;Acc:HGNC:1590]
ENSG00000172731	0.304341	-1.71624	8.98772e-133	6.26114e-131	yes	down	38.93	12.01	38.82	40.05	37.92	11.95	12.25	11.83	LRRC20	leucine rich repeat containing 20 [Source:HGNC Symbol;Acc:HGNC:23421]
ENSG00000164463	3.43258	1.77929	9.44891e-133	6.53794e-131	yes	up	5.63	18.75	5.31	5.29	6.29	17.46	18.23	20.56	CREBRF	CREB3 regulatory factor [Source:HGNC Symbol;Acc:HGNC:24050]
ENSG00000167670	0.249209	-2.00457	1.11431e-132	7.68422e-131	yes	down	39.2467	9.83667	43.2	36.48	38.06	10.21	9.99	9.31	CHAF1A	chromatin assembly factor 1 subunit A [Source:HGNC Symbol;Acc:HGNC:1910]
ENSG00000123240	2.12601	1.08815	2.2734e-132	1.56247e-130	yes	up	88.0133	175.68	83.96	91.49	88.59	173.91	176.55	176.58	OPTN	optineurin [Source:HGNC Symbol;Acc:HGNC:17142]
ENSG00000119969	0.205102	-2.28559	1.56503e-131	1.07202e-129	yes	down	44.7433	8.67667	47.69	46.54	40	8.64	7.98	9.41	HELLS	helicase, lymphoid specific [Source:HGNC Symbol;Acc:HGNC:4861]
ENSG00000171320	0.151858	-2.71921	1.1031e-130	7.48101e-129	yes	down	24.3967	4.91	24.5	28.87	19.82	4.28	5.22	5.23	ESCO2	establishment of sister chromatid cohesion N-acetyltransferase 2 [Source:HGNC Symbol;Acc:HGNC:27230]
ENSG00000139354	0.293292	-1.76959	2.30529e-130	1.55824e-128	yes	down	26.19	7.49333	26.13	25.58	26.86	8.17	7.46	6.85	GAS2L3	growth arrest specific 2 like 3 [Source:HGNC Symbol;Acc:HGNC:27475]
ENSG00000119326	0.416892	-1.26226	3.68454e-130	2.4742e-128	yes	down	147.597	61.03	156.83	135.79	150.17	63.86	60.35	58.88	CTNNAL1	catenin alpha like 1 [Source:HGNC Symbol;Acc:HGNC:2512]
ENSG00000129534	0.316054	-1.66176	6.48508e-130	4.34055e-128	yes	down	46.26	15.82	45.57	44.41	48.8	18.3	17.2	11.96	MIS18BP1	MIS18 binding protein 1 [Source:HGNC Symbol;Acc:HGNC:20190]
ENSG00000028277	3.12809	1.64528	2.2787e-129	1.51526e-127	yes	up	10.73	22.5833	13.29	9.61	9.29	24.27	21.25	22.23	POU2F2	POU class 2 homeobox 2 [Source:HGNC Symbol;Acc:HGNC:9213]
ENSG00000035499	0.14788	-2.75751	4.14942e-129	2.7503e-127	yes	down	28.6633	4.36667	26	27.98	32.01	3.94	4.42	4.74	DEPDC1B	DEP domain containing 1B [Source:HGNC Symbol;Acc:HGNC:24902]
ENSG00000131459	2.2907	1.19579	1.1914e-128	7.84603e-127	yes	up	38.93	93.2433	38.15	39.83	38.81	94.49	91.44	93.8	GFPT2	glutamine-fructose-6-phosphate transaminase 2 [Source:HGNC Symbol;Acc:HGNC:4242]
ENSG00000128944	0.238514	-2.06785	3.70935e-128	2.42719e-126	yes	down	72.1467	18.4667	72	68.59	75.85	19.02	16.11	20.27	KNSTRN	kinetochore localized astrin (SPAG5) binding protein [Source:HGNC Symbol;Acc:HGNC:30767]
ENSG00000160949	0.192091	-2.38014	2.5853e-127	1.67562e-125	yes	down	18.0133	3.39333	19.78	17.69	16.57	3.28	3.16	3.74	TONSL	tonsoku like, DNA repair protein [Source:HGNC Symbol;Acc:HGNC:7801]
ENSG00000075340	0.37971	-1.39703	2.69257e-127	1.73964e-125	yes	down	28.6867	12.8533	27.77	33.79	24.5	12.26	11.68	14.62	ADD2	adducin 2 [Source:HGNC Symbol;Acc:HGNC:244]
ENSG00000130513	5.48084	2.4544	1.34464e-126	8.66022e-125	yes	up	13.4767	74.57	11.36	13.99	15.08	74.97	74.84	73.9	GDF15	growth differentiation factor 15 [Source:HGNC Symbol;Acc:HGNC:30142]
ENSG00000165244	0.128953	-2.95509	2.74581e-126	1.75193e-124	yes	down	21.2567	2.79	20.7	20.39	22.68	3.19	1.99	3.19	ZNF367	zinc finger protein 367 [Source:HGNC Symbol;Acc:HGNC:18320]
ENSG00000101361	0.342607	-1.54537	4.92753e-126	3.13418e-124	yes	down	140.18	50.67	154.05	137.82	128.67	48.65	51.85	51.51	NOP56	NOP56 ribonucleoprotein [Source:HGNC Symbol;Acc:HGNC:15911]
ENSG00000186871	0.131611	-2.92565	4.41877e-124	2.80188e-122	yes	down	12.73	1.70667	13.68	12.36	12.15	1.79	1.53	1.8	ERCC6L	ERCC excision repair 6 like, spindle assembly checkpoint helicase [Source:HGNC Symbol;Acc:HGNC:20794]
ENSG00000012822	2.74595	1.4573	2.59603e-123	1.64103e-121	yes	up	34.87	88.41	32.96	36.6	35.05	94.09	87.52	83.62	CALCOCO1	calcium binding and coiled-coil domain 1 [Source:HGNC Symbol;Acc:HGNC:29306]
ENSG00000132967	0.304605	-1.71499	3.46732e-123	2.18505e-121	yes	down	254.597	78.92	265.76	242.86	255.17	79.24	77.27	80.25	HMGB1P5	high mobility group box 1 pseudogene 5 [Source:HGNC Symbol;Acc:HGNC:4997]
ENSG00000260916	2.47445	1.30711	3.67219e-123	2.30706e-121	yes	up	24.47	60.6867	22.75	25.26	25.4	62.34	61.64	58.08	CCPG1	cell cycle progression 1 [Source:HGNC Symbol;Acc:HGNC:24227]
ENSG00000062822	0.246188	-2.02217	1.28129e-122	8.0251e-121	yes	down	42.9067	12.0667	49.23	40.95	38.54	11.51	10.95	13.74	POLD1	DNA polymerase delta 1, catalytic subunit [Source:HGNC Symbol;Acc:HGNC:9175]
ENSG00000135114	19.3051	4.27091	1.694e-122	1.05777e-120	yes	up	0.763333	17.75	0.81	0.59	0.89	15.79	18.23	19.23	OASL	2'-5'-oligoadenylate synthetase like [Source:HGNC Symbol;Acc:HGNC:8090]
ENSG00000139618	0.269241	-1.89303	2.96588e-122	1.84633e-120	yes	down	15.85	3.54	16.39	14.69	16.47	3.28	5.09	2.25	BRCA2	BRCA2, DNA repair associated [Source:HGNC Symbol;Acc:HGNC:1101]
ENSG00000151503	0.345908	-1.53154	7.14999e-121	4.39757e-119	yes	down	35.2767	12.8633	38.31	33.51	34.01	12.78	13.93	11.88	NCAPD3	non-SMC condensin II complex subunit D3 [Source:HGNC Symbol;Acc:HGNC:28952]
ENSG00000108448	3.69379	1.8851	2.47483e-120	1.51758e-118	yes	up	17.5867	69.8033	20.86	16.68	15.22	72.27	66.02	71.12	TRIM16L	tripartite motif containing 16 like [Source:HGNC Symbol;Acc:HGNC:32670]
ENSG00000182628	0.351075	-1.51015	5.40092e-120	3.30198e-118	yes	down	143.87	52.6267	145.35	140.83	145.43	52.2	53.8	51.88	SKA2	spindle and kinetochore associated complex subunit 2 [Source:HGNC Symbol;Acc:HGNC:28006]
ENSG00000134222	0.132698	-2.91378	6.15531e-120	3.75199e-118	yes	down	37.02	5.21667	38.09	35.15	37.82	5.81	5.61	4.23	PSRC1	proline and serine rich coiled-coil 1 [Source:HGNC Symbol;Acc:HGNC:24472]
ENSG00000148019	0.362411	-1.4643	9.31509e-120	5.6612e-118	yes	down	31.1633	10.29	31.24	29.7	32.55	10.3	10.52	10.05	CEP78	centrosomal protein 78 [Source:HGNC Symbol;Acc:HGNC:25740]
ENSG00000135451	0.138327	-2.85384	1.45424e-119	8.8119e-118	yes	down	68.37	11.6233	72.33	69.88	62.9	9.88	13.01	11.98	TROAP	trophinin associated protein [Source:HGNC Symbol;Acc:HGNC:12327]
ENSG00000100749	0.304355	-1.71617	2.32815e-119	1.40657e-117	yes	down	67.8	20.9467	68.37	67.6	67.43	21.69	20.13	21.02	VRK1	VRK serine/threonine kinase 1 [Source:HGNC Symbol;Acc:HGNC:12718]
ENSG00000119397	0.282433	-1.82402	2.61316e-119	1.57412e-117	yes	down	18.16	5.14667	18.08	18.42	17.98	5.09	4.94	5.41	CNTRL	centriolin [Source:HGNC Symbol;Acc:HGNC:1858]
ENSG00000092470	0.133632	-2.90366	2.85995e-119	1.71773e-117	yes	down	16.77	2.77333	17.64	15.42	17.25	3.04	3.24	2.04	WDR76	WD repeat domain 76 [Source:HGNC Symbol;Acc:HGNC:25773]
ENSG00000136450	0.368323	-1.44096	6.60068e-119	3.95288e-117	yes	down	104.24	37.6367	104.54	90.95	117.23	38.18	39.34	35.39	SRSF1	serine and arginine rich splicing factor 1 [Source:HGNC Symbol;Acc:HGNC:10780]
ENSG00000177697	0.49486	-1.01491	2.47923e-118	1.48038e-116	yes	down	266.73	134.457	267.75	270.68	261.76	131.29	136.67	135.41	CD151	CD151 molecule (Raph blood group) [Source:HGNC Symbol;Acc:HGNC:1630]
ENSG00000080839	0.292229	-1.77483	5.60972e-118	3.33022e-116	yes	down	18.1	5.48667	18.8	17.1	18.4	5.46	5.73	5.27	RBL1	RB transcriptional corepressor like 1 [Source:HGNC Symbol;Acc:HGNC:9893]
ENSG00000164611	0.368672	-1.43959	6.08648e-118	3.60281e-116	yes	down	370.053	140.357	348.2	368.06	393.9	138.22	141.82	141.03	PTTG1	pituitary tumor-transforming 1 [Source:HGNC Symbol;Acc:HGNC:9690]
ENSG00000123374	0.358621	-1.47947	1.04235e-117	6.15229e-116	yes	down	74.6867	26.3833	76.57	73.42	74.07	24.63	27.38	27.14	CDK2	cyclin dependent kinase 2 [Source:HGNC Symbol;Acc:HGNC:1771]
ENSG00000174371	0.191855	-2.38191	1.06883e-117	6.29044e-116	yes	down	21.0333	4.06667	23.18	19.74	20.18	4.56	3.91	3.73	EXO1	exonuclease 1 [Source:HGNC Symbol;Acc:HGNC:3511]
ENSG00000115355	0.436828	-1.19486	1.30829e-117	7.67766e-116	yes	down	44.2533	19.7767	44.63	42.68	45.45	20.52	19.41	19.4	CCDC88A	coiled-coil domain containing 88A [Source:HGNC Symbol;Acc:HGNC:25523]
ENSG00000179532	3.22372	1.68873	1.49107e-117	8.72531e-116	yes	up	5.85333	17.6433	6.33	5.4	5.83	18.75	15.83	18.35	DNHD1	dynein heavy chain domain 1 [Source:HGNC Symbol;Acc:HGNC:26532]
ENSG00000104856	3.80972	1.92969	2.14254e-117	1.25018e-115	yes	up	11.8333	43.75	12.94	11.26	11.3	42.08	45.41	43.76	RELB	RELB proto-oncogene, NF-kB subunit [Source:HGNC Symbol;Acc:HGNC:9956]
ENSG00000259781	0.282323	-1.82458	1.183e-116	6.84435e-115	yes	down	242.08	69.7167	234.79	242.07	249.38	71.83	63.62	73.7	HMGB1P6	high mobility group box 1 pseudogene 6 [Source:HGNC Symbol;Acc:HGNC:4998]
ENSG00000161010	2.50895	1.32708	1.77383e-116	1.02338e-114	yes	up	24.6567	60.52	27.38	24.94	21.65	61.62	59.34	60.6	MRNIP	MRN complex interacting protein [Source:HGNC Symbol;Acc:HGNC:30817]
ENSG00000134802	0.446212	-1.1642	2.36358e-116	1.35979e-114	yes	down	119.65	53.73	122.77	126.59	109.59	52.67	54.16	54.36	SLC43A3	solute carrier family 43 member 3 [Source:HGNC Symbol;Acc:HGNC:17466]
ENSG00000128335	3.10178	1.6331	5.81887e-116	3.33827e-114	yes	up	16.4167	47.94	16.74	17.22	15.29	48.21	47.11	48.5	APOL2	apolipoprotein L2 [Source:HGNC Symbol;Acc:HGNC:619]
ENSG00000189057	0.0885524	-3.49732	1.06586e-115	6.08077e-114	yes	down	16.1167	1.43667	19.7	14.52	14.13	1.19	1.62	1.5	FAM111B	family with sequence similarity 111 member B [Source:HGNC Symbol;Acc:HGNC:24200]
ENSG00000239306	0.311844	-1.6811	1.46876e-115	8.35602e-114	yes	down	56.9267	18.1167	62	54.66	54.12	17.4	18.16	18.79	RBM14	RNA binding motif protein 14 [Source:HGNC Symbol;Acc:HGNC:14219]
ENSG00000113916	3.97595	1.9913	2.52309e-115	1.43145e-113	yes	up	7.68	32.2433	7.71	7.73	7.6	34.53	32.53	29.67	BCL6	BCL6, transcription repressor [Source:HGNC Symbol;Acc:HGNC:1001]
ENSG00000076003	0.346307	-1.52988	5.21226e-115	2.94896e-113	yes	down	42.9033	15.21	45.73	40.68	42.3	15.8	15.39	14.44	MCM6	minichromosome maintenance complex component 6 [Source:HGNC Symbol;Acc:HGNC:6949]
ENSG00000116962	0.357176	-1.48529	8.92295e-115	5.03446e-113	yes	down	27.6033	9.98	28.23	28.96	25.62	10.48	9.85	9.61	NID1	nidogen 1 [Source:HGNC Symbol;Acc:HGNC:7821]
ENSG00000106624	0.332231	-1.58974	4.02325e-114	2.26374e-112	yes	down	38.97	13.6433	37.95	40.41	38.55	13.01	14.08	13.84	AEBP1	AE binding protein 1 [Source:HGNC Symbol;Acc:HGNC:303]
ENSG00000121621	0.194901	-2.35918	9.33929e-114	5.24049e-112	yes	down	21.5767	4.26	21.68	20.08	22.97	4.24	3.85	4.69	KIF18A	kinesin family member 18A [Source:HGNC Symbol;Acc:HGNC:29441]
ENSG00000234465	8.73944	3.12754	3.24064e-113	1.81343e-111	yes	up	3.68333	34.5267	4.03	3.77	3.25	37.38	33.06	33.14	PINLYP	phospholipase A2 inhibitor and LY6/PLAUR domain containing [Source:HGNC Symbol;Acc:HGNC:44206]
ENSG00000167378	2.76701	1.46833	4.2911e-113	2.39471e-111	yes	up	6.2	17.45	6.65	6.15	5.8	17.16	17.55	17.64	IRGQ	immunity related GTPase Q [Source:HGNC Symbol;Acc:HGNC:24868]
ENSG00000198554	0.307419	-1.70172	7.49187e-113	4.16959e-111	yes	down	22.2467	6.69667	22.51	20.15	24.08	6.63	7.16	6.3	WDHD1	WD repeat and HMG-box DNA binding protein 1 [Source:HGNC Symbol;Acc:HGNC:23170]
ENSG00000136492	0.14293	-2.80662	2.17689e-112	1.20826e-110	yes	down	9.86333	1.37667	9.57	9.58	10.44	1.53	1.12	1.48	BRIP1	BRCA1 interacting protein C-terminal helicase 1 [Source:HGNC Symbol;Acc:HGNC:20473]
ENSG00000077514	0.29928	-1.74043	3.43181e-112	1.89964e-110	yes	down	27.31	8.24	27.28	27.57	27.08	8.5	9.18	7.04	POLD3	DNA polymerase delta 3, accessory subunit [Source:HGNC Symbol;Acc:HGNC:20932]
ENSG00000198380	2.174	1.12035	8.18909e-112	4.50862e-110	yes	up	16.1	35.59	15.18	16.04	17.08	36.71	35.42	34.64	GFPT1	glutamine--fructose-6-phosphate transaminase 1 [Source:HGNC Symbol;Acc:HGNC:4241]
ENSG00000051341	0.217482	-2.20103	1.66407e-111	9.1372e-110	yes	down	9.30333	2.08	9.87	8.6	9.44	2.03	2.21	2	POLQ	DNA polymerase theta [Source:HGNC Symbol;Acc:HGNC:9186]
ENSG00000160957	0.277726	-1.84827	5.49934e-111	3.00352e-109	yes	down	46.0267	12.82	46.68	46.1	45.3	11.48	13.79	13.19	RECQL4	RecQ like helicase 4 [Source:HGNC Symbol;Acc:HGNC:9949]
ENSG00000179889	2.14948	1.10398	6.8316e-111	3.72122e-109	yes	up	31.2567	63.18	32.9	32.33	28.54	62.68	61.36	65.5	PDXDC1	pyridoxal dependent decarboxylase domain containing 1 [Source:HGNC Symbol;Acc:HGNC:28995]
ENSG00000279208	3.96528	1.98742	9.26084e-111	5.03107e-109	yes	up	11.8	57.6333	13.01	12.43	9.96	59.06	56.07	57.77	CR381653.2	ankyrin repeat domain 18A (ANKRD18A) pseudogene
ENSG00000029363	0.497049	-1.00854	9.41192e-111	5.09962e-109	yes	down	82.9533	37.0933	87.79	80.44	80.63	38.16	34.14	38.98	BCLAF1	BCL2 associated transcription factor 1 [Source:HGNC Symbol;Acc:HGNC:16863]
ENSG00000145817	2.12343	1.08639	1.20132e-110	6.49191e-109	yes	up	45.0533	83.5133	47.82	46.59	40.75	83.69	85.03	81.82	YIPF5	Yip1 domain family member 5 [Source:HGNC Symbol;Acc:HGNC:24877]
ENSG00000128245	0.435595	-1.19894	1.20721e-110	6.50654e-109	yes	down	125.237	55.5833	127.36	122.61	125.74	53.87	54.24	58.64	YWHAH	tyrosine 3-monooxygenase/tryptophan 5-monooxygenase activation protein eta [Source:HGNC Symbol;Acc:HGNC:12853]
ENSG00000101773	0.346371	-1.52961	4.09162e-110	2.19373e-108	yes	down	47.85	17.41	45.54	46.41	51.6	18.25	16.5	17.48	RBBP8	RB binding protein 8, endonuclease [Source:HGNC Symbol;Acc:HGNC:9891]
ENSG00000123505	0.378996	-1.39974	5.90055e-110	3.15533e-108	yes	down	54.5033	21.06	57.4	51.36	54.75	19.9	20.82	22.46	AMD1	adenosylmethionine decarboxylase 1 [Source:HGNC Symbol;Acc:HGNC:457]
ENSG00000178719	2.06279	1.0446	1.10813e-109	5.89496e-108	yes	up	104.75	208.733	100.94	110.52	102.79	209.14	207.32	209.74	GRINA	glutamate ionotropic receptor NMDA type subunit associated protein 1 [Source:HGNC Symbol;Acc:HGNC:4589]
ENSG00000173705	0.341203	-1.5513	1.37929e-109	7.31845e-108	yes	down	26.2467	8.79333	26.97	26.53	25.24	8.56	9.21	8.61	SUSD5	sushi domain containing 5 [Source:HGNC Symbol;Acc:HGNC:29061]
ENSG00000106628	0.413373	-1.27448	4.23843e-109	2.2373e-107	yes	down	132.933	54.6667	128.81	134.59	135.4	55.06	53.16	55.78	POLD2	DNA polymerase delta 2, accessory subunit [Source:HGNC Symbol;Acc:HGNC:9176]
ENSG00000113615	2.34249	1.22804	4.26489e-109	2.24548e-107	yes	up	11.8767	27.02	12.55	11.86	11.22	27.25	26.95	26.86	SEC24A	SEC24 homolog A, COPII coat complex component [Source:HGNC Symbol;Acc:HGNC:10703]
ENSG00000135924	3.05633	1.6118	6.5331e-109	3.43088e-107	yes	up	17	51.8467	14.92	18.78	17.3	52.07	53.76	49.71	DNAJB2	DnaJ heat shock protein family (Hsp40) member B2 [Source:HGNC Symbol;Acc:HGNC:5228]
ENSG00000149289	2.13018	1.09097	8.22495e-109	4.30832e-107	yes	up	11.3967	24.5667	11	11.52	11.67	24.84	24.51	24.35	ZC3H12C	zinc finger CCCH-type containing 12C [Source:HGNC Symbol;Acc:HGNC:29362]
ENSG00000129566	2.44234	1.28826	2.86845e-108	1.49869e-106	yes	up	12.1933	35.72	12.63	12.47	11.48	36.88	38.3	31.98	TEP1	telomerase associated protein 1 [Source:HGNC Symbol;Acc:HGNC:11726]
ENSG00000172009	0.380096	-1.39557	4.52938e-108	2.35447e-106	yes	down	123.613	48.9167	135.65	115.86	119.33	51.13	46.23	49.39	THOP1	thimet oligopeptidase 1 [Source:HGNC Symbol;Acc:HGNC:11793]
ENSG00000134070	2.8098	1.49047	4.78953e-108	2.4834e-106	yes	up	12.34	35.21	11.95	12.96	12.11	34.9	35.25	35.48	IRAK2	interleukin 1 receptor associated kinase 2 [Source:HGNC Symbol;Acc:HGNC:6113]
ENSG00000160447	0.302789	-1.72361	5.36982e-108	2.77725e-106	yes	down	30.3667	8.84667	32.89	30.11	28.1	9.08	9.18	8.28	PKN3	protein kinase N3 [Source:HGNC Symbol;Acc:HGNC:17999]
ENSG00000108055	0.464457	-1.10638	1.53988e-107	7.90432e-106	yes	down	69.1	32.6	69.23	67.36	70.71	32.7	30.59	34.51	SMC3	structural maintenance of chromosomes 3 [Source:HGNC Symbol;Acc:HGNC:2468]
ENSG00000141556	0.435698	-1.1986	2.49317e-107	1.27338e-105	yes	down	51.76	20.6767	52.99	50.13	52.16	19.87	19.38	22.78	TBCD	tubulin folding cofactor D [Source:HGNC Symbol;Acc:HGNC:11581]
ENSG00000130826	0.391916	-1.35138	5.2764e-107	2.68821e-105	yes	down	82.9033	32.4767	89.88	80.14	78.69	31.01	33.79	32.63	DKC1	dyskerin pseudouridine synthase 1 [Source:HGNC Symbol;Acc:HGNC:2890]
ENSG00000172167	0.270755	-1.88494	8.00888e-107	4.07022e-105	yes	down	27.64	7.67	27.12	27.08	28.72	7.07	8.55	7.39	MTBP	MDM2 binding protein [Source:HGNC Symbol;Acc:HGNC:7417]
ENSG00000099622	0.451607	-1.14686	4.07238e-106	2.05942e-104	yes	down	304.403	134.177	314.43	325.36	273.42	129.31	141.07	132.15	CIRBP	cold inducible RNA binding protein [Source:HGNC Symbol;Acc:HGNC:1982]
ENSG00000012048	0.343176	-1.54298	4.5342e-106	2.28731e-104	yes	down	33.4633	9.66	36.34	31.7	32.35	9.9	10.02	9.06	BRCA1	BRCA1, DNA repair associated [Source:HGNC Symbol;Acc:HGNC:1100]
ENSG00000177706	0.427871	-1.22475	8.77752e-106	4.39542e-104	yes	down	82.2333	32.8833	85.08	82.86	78.76	32.35	33.09	33.21	FAM20C	FAM20C, golgi associated secretory pathway kinase [Source:HGNC Symbol;Acc:HGNC:22140]
ENSG00000114796	2.73793	1.45309	1.55202e-105	7.73403e-104	yes	up	16.3633	38.6433	16.52	14.35	18.22	34.33	39.71	41.89	KLHL24	kelch like family member 24 [Source:HGNC Symbol;Acc:HGNC:25947]
ENSG00000102316	2.06576	1.04668	2.38931e-105	1.18775e-103	yes	up	68.6867	148.303	65.55	73.67	66.84	145.89	150.14	148.88	MAGED2	MAGE family member D2 [Source:HGNC Symbol;Acc:HGNC:16353]
ENSG00000103018	0.443178	-1.17404	5.09091e-105	2.52462e-103	yes	down	105.757	47.4567	122.67	97.79	96.81	48.71	46.41	47.25	CYB5B	cytochrome b5 type B [Source:HGNC Symbol;Acc:HGNC:24374]
ENSG00000145604	0.340107	-1.55594	6.98372e-105	3.45492e-103	yes	down	29.8133	10.34	31.84	28.96	28.64	9.59	11.31	10.12	SKP2	S-phase kinase associated protein 2 [Source:HGNC Symbol;Acc:HGNC:10901]
ENSG00000179242	0.361578	-1.46762	1.65229e-104	8.15436e-103	yes	down	25.88	9.51333	27.86	26.26	23.52	10.02	9.03	9.49	CDH4	cadherin 4 [Source:HGNC Symbol;Acc:HGNC:1763]
ENSG00000138092	0.244947	-2.02946	3.71536e-104	1.82919e-102	yes	down	26.8	6.52667	26.78	28.5	25.12	6.15	5.92	7.51	CENPO	centromere protein O [Source:HGNC Symbol;Acc:HGNC:28152]
ENSG00000123219	0.243071	-2.04055	6.93648e-104	3.40686e-102	yes	down	56.12	13.73	51.39	55.49	61.48	13.49	14.25	13.45	CENPK	centromere protein K [Source:HGNC Symbol;Acc:HGNC:29479]
ENSG00000152253	0.127109	-2.97586	9.81394e-104	4.8086e-102	yes	down	40.7167	5.02667	38.6	36.7	46.85	4.75	5.07	5.26	SPC25	SPC25, NDC80 kinetochore complex component [Source:HGNC Symbol;Acc:HGNC:24031]
ENSG00000123136	0.377836	-1.40417	2.30858e-103	1.12576e-101	yes	down	118.257	44.6667	123.61	111.83	119.33	44.65	44.55	44.8	DDX39A	DExD-box helicase 39A [Source:HGNC Symbol;Acc:HGNC:17821]
ENSG00000167088	0.413922	-1.27257	5.32014e-103	2.58817e-101	yes	down	73.4567	32.73	71.54	71.7	77.13	34.19	36.06	27.94	SNRPD1	small nuclear ribonucleoprotein D1 polypeptide [Source:HGNC Symbol;Acc:HGNC:11158]
ENSG00000221829	0.181444	-2.4624	7.8956e-103	3.82293e-101	yes	down	32.8933	5.73333	36.17	31.29	31.22	5.55	6.51	5.14	FANCG	FA complementation group G [Source:HGNC Symbol;Acc:HGNC:3588]
ENSG00000169594	0.404264	-1.30663	4.94857e-102	2.39037e-100	yes	down	33.2867	13.54	33.12	34.49	32.25	14.3	13.03	13.29	BNC1	basonuclin 1 [Source:HGNC Symbol;Acc:HGNC:1081]
ENSG00000163535	0.230282	-2.11853	5.24877e-102	2.52941e-100	yes	down	15.5167	3.49333	15.08	14.81	16.66	3.81	3.67	3	SGO2	shugoshin 2 [Source:HGNC Symbol;Acc:HGNC:30812]
ENSG00000113569	0.429671	-1.2187	1.87294e-101	8.94163e-100	yes	down	32.8967	12.9633	33.21	31.06	34.42	14.72	13.29	10.88	NUP155	nucleoporin 155 [Source:HGNC Symbol;Acc:HGNC:8063]
ENSG00000132383	0.485781	-1.04162	3.03557e-101	1.44249e-99	yes	down	82.03	39.59	86.91	76.95	82.23	40.12	38.87	39.78	RPA1	replication protein A1 [Source:HGNC Symbol;Acc:HGNC:10289]
ENSG00000136052	3.20928	1.68225	5.46538e-101	2.59112e-99	yes	up	10.3433	38.5933	10.2	11.05	9.78	38.85	39.24	37.69	SLC41A2	solute carrier family 41 member 2 [Source:HGNC Symbol;Acc:HGNC:31045]
ENSG00000170581	2.39256	1.25856	9.90357e-101	4.68441e-99	yes	up	21.6767	50.52	22.81	22.35	19.87	50.24	49.67	51.65	STAT2	signal transducer and activator of transcription 2 [Source:HGNC Symbol;Acc:HGNC:11363]
ENSG00000069020	2.55238	1.35184	1.51799e-100	7.16358e-99	yes	up	5.86667	14.84	5.78	6.3	5.52	15.34	14.14	15.04	MAST4	microtubule associated serine/threonine kinase family member 4 [Source:HGNC Symbol;Acc:HGNC:19037]
ENSG00000104332	0.363437	-1.46022	1.67557e-100	7.88904e-99	yes	down	26.4367	9.67667	25.95	26.45	26.91	9.75	9.97	9.31	SFRP1	secreted frizzled related protein 1 [Source:HGNC Symbol;Acc:HGNC:10776]
ENSG00000134291	0.47219	-1.08256	1.90994e-100	8.97188e-99	yes	down	190.62	94.35	191.97	193.63	186.26	94.04	94.69	94.32	TMEM106C	transmembrane protein 106C [Source:HGNC Symbol;Acc:HGNC:28775]
ENSG00000058804	0.441169	-1.1806	2.25902e-100	1.05874e-98	yes	down	41.39	18.5567	41.1	40.23	42.84	19.46	18.12	18.09	NDC1	NDC1 transmembrane nucleoporin [Source:HGNC Symbol;Acc:HGNC:25525]
ENSG00000186193	0.173002	-2.53114	2.41405e-99	1.12882e-97	yes	down	16.38	2.74667	16.93	16.89	15.32	2.64	2.53	3.07	SAPCD2	suppressor APC domain containing 2 [Source:HGNC Symbol;Acc:HGNC:28055]
ENSG00000144354	0.22948	-2.12356	2.46558e-99	1.15029e-97	yes	down	27.4667	6.65667	29.16	25.42	27.82	6.46	6.78	6.73	CDCA7	cell division cycle associated 7 [Source:HGNC Symbol;Acc:HGNC:14628]
ENSG00000166046	5.51624	2.46368	3.67516e-99	1.7107e-97	yes	up	4	16.68	3.73	4.45	3.82	17.23	16.91	15.9	TCP11L2	t-complex 11 like 2 [Source:HGNC Symbol;Acc:HGNC:28627]
ENSG00000026036	0.321835	-1.63561	7.93792e-99	3.68654e-97	yes	down	84.5167	20.7333	85.95	86.31	81.29	23.8	19.45	18.95	RTEL1-TNFRSF6B	RTEL1-TNFRSF6B readthrough (NMD candidate) [Source:HGNC Symbol;Acc:HGNC:44095]
ENSG00000116062	0.493411	-1.01914	1.40852e-98	6.51195e-97	yes	down	47.4833	23.2167	47.85	46.65	47.95	23.91	23.27	22.47	MSH6	mutS homolog 6 [Source:HGNC Symbol;Acc:HGNC:7329]
ENSG00000117425	8.91804	3.15673	6.17989e-98	2.85068e-96	yes	up	0.903333	9.44667	1.2	0.86	0.65	9.01	8.78	10.55	PTCH2	patched 2 [Source:HGNC Symbol;Acc:HGNC:9586]
ENSG00000143401	0.38615	-1.37277	6.48627e-98	2.98529e-96	yes	down	63.05	23.5533	61.08	59.42	68.65	21.95	26.13	22.58	ANP32E	acidic nuclear phosphoprotein 32 family member E [Source:HGNC Symbol;Acc:HGNC:16673]
ENSG00000265972	7.07373	2.82247	8.47913e-98	3.89374e-96	yes	up	19.3733	139.293	15.83	22.03	20.26	137.78	139.92	140.18	TXNIP	thioredoxin interacting protein [Source:HGNC Symbol;Acc:HGNC:16952]
ENSG00000077044	2.68836	1.42673	8.96658e-98	4.10838e-96	yes	up	13.32	36.9933	14.69	13.79	11.48	32.87	35.21	42.9	DGKD	diacylglycerol kinase delta [Source:HGNC Symbol;Acc:HGNC:2851]
ENSG00000186591	2.0497	1.03541	1.56069e-97	7.11906e-96	yes	up	22.6233	44.5667	22.81	22.12	22.94	44.41	43.96	45.33	UBE2H	ubiquitin conjugating enzyme E2 H [Source:HGNC Symbol;Acc:HGNC:12484]
ENSG00000115163	0.122081	-3.03408	1.60003e-97	7.28228e-96	yes	down	40.1967	5.01	38.42	40.28	41.89	4.81	4.79	5.43	CENPA	centromere protein A [Source:HGNC Symbol;Acc:HGNC:1851]
ENSG00000186951	2.54418	1.3472	1.98699e-97	9.02341e-96	yes	up	5.86667	16.24	5.54	5.81	6.25	14.32	15.92	18.48	PPARA	peroxisome proliferator activated receptor alpha [Source:HGNC Symbol;Acc:HGNC:9232]
ENSG00000178295	0.257886	-1.95519	3.12598e-97	1.41332e-95	yes	down	10.3367	2.50333	11.35	10.1	9.56	2.5	1.99	3.02	GEN1	GEN1, Holliday junction 5' flap endonuclease [Source:HGNC Symbol;Acc:HGNC:26881]
ENSG00000162772	5.76745	2.52793	3.91684e-97	1.76698e-95	yes	up	5.99667	43.8067	4.93	7.59	5.47	48.44	41.43	41.55	ATF3	activating transcription factor 3 [Source:HGNC Symbol;Acc:HGNC:785]
ENSG00000123975	0.432927	-1.2078	7.11588e-97	3.20308e-95	yes	down	492.217	217.373	498.8	475.98	501.87	222.56	206.67	222.89	CKS2	CDC28 protein kinase regulatory subunit 2 [Source:HGNC Symbol;Acc:HGNC:2000]
ENSG00000231290	2.23012	1.15712	6.31142e-96	2.81009e-94	yes	up	58.5567	85.7833	61.32	53.38	60.97	82.74	79.64	94.97	APCDD1L-DT	APCDD1L divergent transcript [Source:HGNC Symbol;Acc:HGNC:27152]
ENSG00000133103	2.42358	1.27714	8.50373e-96	3.77798e-94	yes	up	16.1233	39.3267	16.18	16.06	16.13	38.78	39.97	39.23	COG6	component of oligomeric golgi complex 6 [Source:HGNC Symbol;Acc:HGNC:18621]
ENSG00000013573	0.262375	-1.9303	8.83885e-96	3.91837e-94	yes	down	52.8833	13.6733	62.57	48.46	47.62	13.33	12.56	15.13	DDX11	DEAD/H-box helicase 11 [Source:HGNC Symbol;Acc:HGNC:2736]
ENSG00000105486	0.294198	-1.76514	9.37613e-96	4.14757e-94	yes	down	31.5267	8.76	33.22	30.42	30.94	8.63	8.39	9.26	LIG1	DNA ligase 1 [Source:HGNC Symbol;Acc:HGNC:6598]
ENSG00000256618	3.49388	1.80483	9.63094e-96	4.25111e-94	yes	up	18.1	64.26	18.91	16.77	18.62	63.17	68.6	61.01	MTRNR2L1	MT-RNR2 like 1 [Source:HGNC Symbol;Acc:HGNC:37155]
ENSG00000161888	0.0855141	-3.54769	1.48194e-95	6.52722e-94	yes	down	27.9067	3.15667	27.79	25.25	30.68	1.84	5.12	2.51	SPC24	SPC24, NDC80 kinetochore complex component [Source:HGNC Symbol;Acc:HGNC:26913]
ENSG00000178607	2.65359	1.40794	5.28535e-95	2.32295e-93	yes	up	7.39333	25.2	7.19	6.87	8.12	25.42	25.51	24.67	ERN1	endoplasmic reticulum to nucleus signaling 1 [Source:HGNC Symbol;Acc:HGNC:3449]
ENSG00000107201	3.18846	1.67286	5.55375e-95	2.43568e-93	yes	up	7.23667	23.41	6.42	7.48	7.81	22.44	23.94	23.85	DDX58	DExD/H-box helicase 58 [Source:HGNC Symbol;Acc:HGNC:19102]
ENSG00000076248	0.213341	-2.22876	6.58413e-95	2.8814e-93	yes	down	45.0367	9.64333	52.46	40.42	42.23	8.82	9.49	10.62	UNG	uracil DNA glycosylase [Source:HGNC Symbol;Acc:HGNC:12572]
ENSG00000120686	2.22963	1.1568	1.17181e-94	5.10633e-93	yes	up	44.6433	103.817	41.41	42.97	49.55	100.77	107.54	103.14	UFM1	ubiquitin fold modifier 1 [Source:HGNC Symbol;Acc:HGNC:20597]
ENSG00000197457	0.406636	-1.29819	1.18968e-94	5.17322e-93	yes	down	88.4867	36.08	90.68	90.9	83.88	33.19	36.66	38.39	STMN3	stathmin 3 [Source:HGNC Symbol;Acc:HGNC:15926]
ENSG00000168393	0.333981	-1.58216	1.8432e-94	7.99799e-93	yes	down	110.687	37.6967	114.15	109.48	108.43	39.48	36.56	37.05	DTYMK	deoxythymidylate kinase [Source:HGNC Symbol;Acc:HGNC:3061]
ENSG00000143815	0.44239	-1.17661	5.32545e-94	2.30593e-92	yes	down	54.6	23.8833	50.33	52.63	60.84	22.84	25.07	23.74	LBR	lamin B receptor [Source:HGNC Symbol;Acc:HGNC:6518]
ENSG00000239672	0.350788	-1.51133	7.59624e-94	3.28225e-92	yes	down	147.68	52.3633	151.87	150.95	140.22	54.32	49.25	53.52	NME1	NME/NM23 nucleoside diphosphate kinase 1 [Source:HGNC Symbol;Acc:HGNC:7849]
ENSG00000130517	3.48511	1.80121	1.27522e-93	5.4985e-92	yes	up	13.4133	39.0367	11.48	13.34	15.42	40.26	36.46	40.39	PGPEP1	pyroglutamyl-peptidase I [Source:HGNC Symbol;Acc:HGNC:13568]
ENSG00000168411	0.450633	-1.14998	2.39246e-93	1.02641e-91	yes	down	44.4467	19.9767	46.98	42.51	43.85	20.69	19.03	20.21	RFWD3	ring finger and WD repeat domain 3 [Source:HGNC Symbol;Acc:HGNC:25539]
ENSG00000111581	0.470026	-1.08919	8.81367e-93	3.75287e-91	yes	down	95.1467	41.1867	92.55	94.62	98.27	38.57	41.8	43.19	NUP107	nucleoporin 107 [Source:HGNC Symbol;Acc:HGNC:29914]
ENSG00000105327	4.97499	2.31469	1.11442e-92	4.73535e-91	yes	up	9.31	45.1267	8.63	11.26	8.04	44.97	44.5	45.91	BBC3	BCL2 binding component 3 [Source:HGNC Symbol;Acc:HGNC:17868]
ENSG00000100439	2.59785	1.37732	1.61528e-92	6.84939e-91	yes	up	17.9667	45.65	20.17	17.65	16.08	45.9	43.89	47.16	ABHD4	abhydrolase domain containing 4 [Source:HGNC Symbol;Acc:HGNC:20154]
ENSG00000079308	0.345743	-1.53223	2.02403e-92	8.56492e-91	yes	down	14.5067	4.02333	14.66	16.4	12.46	4.14	3.91	4.02	TNS1	tensin 1 [Source:HGNC Symbol;Acc:HGNC:11973]
ENSG00000185480	0.272875	-1.87369	2.70419e-92	1.14195e-90	yes	down	34.39	9.35333	35.04	34.39	33.74	9.03	9.25	9.78	PARPBP	PARP1 binding protein [Source:HGNC Symbol;Acc:HGNC:26074]
ENSG00000197299	0.17638	-2.50324	4.20375e-92	1.77154e-90	yes	down	11.5	2.79	10.56	9.53	14.41	3.34	2.61	2.42	BLM	BLM RecQ like helicase [Source:HGNC Symbol;Acc:HGNC:1058]
ENSG00000158402	0.125638	-2.99266	4.99333e-91	2.09567e-89	yes	down	22.52	2.90667	21.65	23.37	22.54	3.17	3.11	2.44	CDC25C	cell division cycle 25C [Source:HGNC Symbol;Acc:HGNC:1727]
ENSG00000258602	21.9029	4.45305	1.44193e-90	6.0393e-89	yes	up	1.64333	33.4833	1.46	1.37	2.1	31.64	36.92	31.89	LINC01629	long intergenic non-protein coding RNA 1629 [Source:HGNC Symbol;Acc:HGNC:52260]
ENSG00000189091	0.466689	-1.09947	3.62752e-90	1.51623e-88	yes	down	102.343	43.6	108.06	95.77	103.2	51.24	41.5	38.06	SF3B3	splicing factor 3b subunit 3 [Source:HGNC Symbol;Acc:HGNC:10770]
ENSG00000197451	0.47057	-1.08752	9.21662e-90	3.84451e-88	yes	down	207.797	98.4533	212.91	190.45	220.03	95.37	100.11	99.88	HNRNPAB	heterogeneous nuclear ribonucleoprotein A/B [Source:HGNC Symbol;Acc:HGNC:5034]
ENSG00000253368	2.4221	1.27626	1.31178e-89	5.46068e-88	yes	up	36.8467	88.6233	37.61	35.08	37.85	88.51	85.12	92.24	TRNP1	TMF1-regulated nuclear protein 1 [Source:HGNC Symbol;Acc:HGNC:34348]
ENSG00000129810	0.195099	-2.35772	1.96023e-89	8.14352e-88	yes	down	18.4667	3.90333	18.28	19.33	17.79	3.76	3.62	4.33	SGO1	shugoshin 1 [Source:HGNC Symbol;Acc:HGNC:25088]
ENSG00000027869	5.91477	2.56432	2.99761e-89	1.24028e-87	yes	up	6.01667	33.2467	4.98	6.83	6.24	32.02	35	32.72	SH2D2A	SH2 domain containing 2A [Source:HGNC Symbol;Acc:HGNC:10821]
ENSG00000029993	0.379832	-1.39657	6.46996e-89	2.66087e-87	yes	down	113.813	45.89	115.02	106.55	119.87	48.43	43.31	45.93	HMGB3	high mobility group box 3 [Source:HGNC Symbol;Acc:HGNC:5004]
ENSG00000197530	3.04522	1.60655	6.18659e-88	2.53415e-86	yes	up	14.1	43.2333	12.95	15.86	13.49	41	42.84	45.86	MIB2	mindbomb E3 ubiquitin protein ligase 2 [Source:HGNC Symbol;Acc:HGNC:30577]
ENSG00000130713	0.338693	-1.56195	1.71694e-87	7.00489e-86	yes	down	49.31	16.38	48.25	52	47.68	14.35	18.15	16.64	EXOSC2	exosome component 2 [Source:HGNC Symbol;Acc:HGNC:17097]
ENSG00000139112	2.54422	1.34722	3.12567e-87	1.2727e-85	yes	up	38.1333	98.6167	33.55	41.49	39.36	99.15	99.13	97.57	GABARAPL1	GABA type A receptor associated protein like 1 [Source:HGNC Symbol;Acc:HGNC:4068]
ENSG00000089006	0.445712	-1.16582	4.1463e-87	1.68493e-85	yes	down	99.2033	49.6633	106.5	94.63	96.48	47.64	52.28	49.07	SNX5	sorting nexin 5 [Source:HGNC Symbol;Acc:HGNC:14969]
ENSG00000154767	2.03304	1.02364	4.32716e-87	1.75494e-85	yes	up	27.9567	58.4867	28.56	28.55	26.76	57.28	59.18	59	XPC	XPC complex subunit, DNA damage recognition and repair factor [Source:HGNC Symbol;Acc:HGNC:12816]
ENSG00000121957	0.378486	-1.40169	6.04816e-87	2.44807e-85	yes	down	46.4833	14.6	46.03	46.47	46.95	13.3	16.96	13.54	GPSM2	G protein signaling modulator 2 [Source:HGNC Symbol;Acc:HGNC:29501]
ENSG00000178921	0.351501	-1.5084	8.59291e-87	3.47123e-85	yes	down	33.8033	12.3	37.76	33.08	30.57	13.55	10.33	13.02	PFAS	phosphoribosylformylglycinamidine synthase [Source:HGNC Symbol;Acc:HGNC:8863]
ENSG00000154734	0.364161	-1.45735	8.83245e-87	3.56097e-85	yes	down	37.7333	14.34	41.61	37.11	34.48	15.08	12.45	15.49	ADAMTS1	ADAM metallopeptidase with thrombospondin type 1 motif 1 [Source:HGNC Symbol;Acc:HGNC:217]
ENSG00000109674	0.126472	-2.98311	1.4411e-86	5.79867e-85	yes	down	16.4	2.11667	16.55	15.71	16.94	2.46	1.73	2.16	NEIL3	nei like DNA glycosylase 3 [Source:HGNC Symbol;Acc:HGNC:24573]
ENSG00000159259	0.179027	-2.48175	1.46258e-86	5.87355e-85	yes	down	11.4967	1.98667	12.81	10.97	10.71	2	1.93	2.03	CHAF1B	chromatin assembly factor 1 subunit B [Source:HGNC Symbol;Acc:HGNC:1911]
ENSG00000285565	2.5311	1.33977	1.56396e-86	6.2684e-85	yes	up	33.32	85.8467	34.28	32.51	33.17	85.59	76.82	95.13	AL671762.1	novel transcript
ENSG00000169715	0.422053	-1.2445	2.44456e-86	9.75967e-85	yes	down	329	140.377	314.85	332.29	339.86	136.26	147.02	137.85	MT1E	metallothionein 1E [Source:HGNC Symbol;Acc:HGNC:7397]
ENSG00000261716	4.23786	2.08334	3.3274e-86	1.32585e-84	yes	up	1.85	7.97667	1.88	1.85	1.82	8.25	7.65	8.03	AC239868.1	histone cluster 2, H2bc (pseudogene)
ENSG00000133216	0.420004	-1.25153	4.09233e-86	1.62432e-84	yes	down	26.71	10.7	26.55	27.65	25.93	10.77	10.64	10.69	EPHB2	EPH receptor B2 [Source:HGNC Symbol;Acc:HGNC:3393]
ENSG00000144802	2.49677	1.32006	2.02706e-85	8.01472e-84	yes	up	16.5133	39.4267	15.35	17.5	16.69	37.46	42.33	38.49	NFKBIZ	NFKB inhibitor zeta [Source:HGNC Symbol;Acc:HGNC:29805]
ENSG00000059728	2.79604	1.48338	2.14147e-85	8.45077e-84	yes	up	7.24	19.72	7.12	6.7	7.9	19.08	20.12	19.96	MXD1	MAX dimerization protein 1 [Source:HGNC Symbol;Acc:HGNC:6761]
ENSG00000112312	0.285937	-1.80623	3.85649e-85	1.51602e-83	yes	down	68.1067	19.93	68.07	64	72.25	20.16	19.82	19.81	GMNN	geminin, DNA replication inhibitor [Source:HGNC Symbol;Acc:HGNC:17493]
ENSG00000159388	4.91749	2.29792	4.03618e-85	1.58362e-83	yes	up	3.70333	17.8133	3.61	3.37	4.13	17.68	17.33	18.43	BTG2	BTG anti-proliferation factor 2 [Source:HGNC Symbol;Acc:HGNC:1131]
ENSG00000179630	2.75757	1.4634	6.90973e-85	2.70073e-83	yes	up	9.70333	27.9367	8.93	9.79	10.39	27.42	28.43	27.96	LACC1	laccase domain containing 1 [Source:HGNC Symbol;Acc:HGNC:26789]
ENSG00000146263	0.277502	-1.84943	1.08794e-84	4.22811e-83	yes	down	14.13	3.52	14.39	13.51	14.49	4.15	3.54	2.87	MMS22L	MMS22 like, DNA repair protein [Source:HGNC Symbol;Acc:HGNC:21475]
ENSG00000198700	0.461808	-1.11463	3.47127e-84	1.34142e-82	yes	down	35.1167	12.6767	35.28	34.45	35.62	12.58	12.32	13.13	IPO9	importin 9 [Source:HGNC Symbol;Acc:HGNC:19425]
ENSG00000150961	2.17656	1.12205	3.75305e-84	1.44758e-82	yes	up	22.31	51.44	22.98	23.71	20.24	52.7	51.29	50.33	SEC24D	SEC24 homolog D, COPII coat complex component [Source:HGNC Symbol;Acc:HGNC:10706]
ENSG00000083720	0.386668	-1.37083	4.8319e-84	1.8567e-82	yes	down	31.92	12.37	33.66	31.51	30.59	12.3	12.4	12.41	OXCT1	3-oxoacid CoA-transferase 1 [Source:HGNC Symbol;Acc:HGNC:8527]
ENSG00000163584	0.400113	-1.32152	5.2446e-84	2.01151e-82	yes	down	561.043	226.517	541.79	507.97	633.37	231.1	237.22	211.23	RPL22L1	ribosomal protein L22 like 1 [Source:HGNC Symbol;Acc:HGNC:27610]
ENSG00000090339	17.5153	4.13054	1.07538e-83	4.07867e-82	yes	up	9.56667	170.603	6.96	11.76	9.98	171.25	177.32	163.24	ICAM1	intercellular adhesion molecule 1 [Source:HGNC Symbol;Acc:HGNC:5344]
ENSG00000262001	2.83135	1.50149	2.32363e-83	8.79671e-82	yes	up	18.5267	50.31	17.24	19.39	18.95	52.15	50.91	47.87	DLGAP1-AS2	DLGAP1 antisense RNA 2 [Source:HGNC Symbol;Acc:HGNC:28146]
ENSG00000075702	0.171626	-2.54266	6.21436e-83	2.33964e-81	yes	down	9.90667	1.69667	10.86	9.33	9.53	1.46	1.78	1.85	WDR62	WD repeat domain 62 [Source:HGNC Symbol;Acc:HGNC:24502]
ENSG00000118503	3.19403	1.67538	1.17688e-82	4.42271e-81	yes	up	7.43	21.0533	6.76	8.23	7.3	21.79	20.53	20.84	TNFAIP3	TNF alpha induced protein 3 [Source:HGNC Symbol;Acc:HGNC:11896]
ENSG00000168056	2.29021	1.19548	2.48015e-82	9.28627e-81	yes	up	27.5267	60.96	24.17	29.38	29.03	62.73	58.86	61.29	LTBP3	latent transforming growth factor beta binding protein 3 [Source:HGNC Symbol;Acc:HGNC:6716]
ENSG00000146242	2.48323	1.31222	5.36399e-82	2.00474e-80	yes	up	17.81	45.4333	16.12	18.21	19.1	46.34	45.78	44.18	TPBG	trophoblast glycoprotein [Source:HGNC Symbol;Acc:HGNC:12004]
ENSG00000162496	3.98755	1.9955	6.78885e-82	2.53265e-80	yes	up	11.81	39.8067	9.1	13.79	12.54	38.79	41.49	39.14	DHRS3	dehydrogenase/reductase 3 [Source:HGNC Symbol;Acc:HGNC:17693]
ENSG00000146038	0.31349	-1.67351	7.83445e-82	2.91741e-80	yes	down	14.7033	4.68333	14.97	14.32	14.82	4.9	4.64	4.51	DCDC2	doublecortin domain containing 2 [Source:HGNC Symbol;Acc:HGNC:18141]
ENSG00000077312	0.378835	-1.40036	2.35714e-81	8.71418e-80	yes	down	95.9067	36.87	93.24	99.29	95.19	38.46	35.79	36.36	SNRPA	small nuclear ribonucleoprotein polypeptide A [Source:HGNC Symbol;Acc:HGNC:11151]
ENSG00000197275	0.208132	-2.26443	3.01357e-81	1.1081e-79	yes	down	21.2433	4.40667	21.13	20.69	21.91	5.08	3.97	4.17	RAD54B	RAD54 homolog B [Source:HGNC Symbol;Acc:HGNC:17228]
ENSG00000127564	0.111192	-3.16888	3.94846e-81	1.44925e-79	yes	down	24.4	3.19667	30.04	21.82	21.34	2.5	3.95	3.14	PKMYT1	protein kinase, membrane associated tyrosine/threonine 1 [Source:HGNC Symbol;Acc:HGNC:29650]
ENSG00000135074	0.395902	-1.33679	6.27786e-81	2.29601e-79	yes	down	22.7067	9.35333	24.11	23.42	20.59	8.4	9.38	10.28	ADAM19	ADAM metallopeptidase domain 19 [Source:HGNC Symbol;Acc:HGNC:197]
ENSG00000164400	25.6387	4.68025	8.66827e-81	3.15898e-79	yes	up	1.88667	48.81	1.29	2.59	1.78	49.01	52.57	44.85	CSF2	colony stimulating factor 2 [Source:HGNC Symbol;Acc:HGNC:2434]
ENSG00000163734	4.64586	2.21594	1.10445e-80	4.01781e-79	yes	up	9.68333	52.6833	9.58	10.38	9.09	50.76	51.41	55.88	CXCL3	C-X-C motif chemokine ligand 3 [Source:HGNC Symbol;Acc:HGNC:4604]
ENSG00000095319	0.454323	-1.13821	1.9485e-80	7.07574e-79	yes	down	52.4467	24.05	60.16	51.81	45.37	24.54	23.23	24.38	NUP188	nucleoporin 188 [Source:HGNC Symbol;Acc:HGNC:17859]
ENSG00000125520	0.311026	-1.68489	7.64453e-80	2.76621e-78	yes	down	51.2767	17.2067	51.21	42.97	59.65	14.65	19.03	17.94	SLC2A4RG	SLC2A4 regulator [Source:HGNC Symbol;Acc:HGNC:15930]
ENSG00000250753	4.68114	2.22686	1.26981e-79	4.58679e-78	yes	up	3.19667	18.47	3.06	3.89	2.64	14.79	17.3	23.32	AC119751.4	coiled-coil domain containing 144A (CCDC144A) pseudogene
ENSG00000104889	0.249422	-2.00334	1.29021e-79	4.65227e-78	yes	down	35.52	8.94667	34.37	31.72	40.47	9.58	7.72	9.54	RNASEH2A	ribonuclease H2 subunit A [Source:HGNC Symbol;Acc:HGNC:18518]
ENSG00000177410	2.15286	1.10626	5.35442e-79	1.92393e-77	yes	up	232.013	502.32	233.81	214.1	248.13	492.6	533.14	481.22	ZFAS1	ZNFX1 antisense RNA 1 [Source:HGNC Symbol;Acc:HGNC:33101]
ENSG00000105499	6.53954	2.70919	5.54796e-79	1.98303e-77	yes	up	4.10333	23.2133	3.87	4.1	4.34	21.36	25.12	23.16	PLA2G4C	phospholipase A2 group IVC [Source:HGNC Symbol;Acc:HGNC:9037]
ENSG00000244879	2.86352	1.51779	5.69446e-79	2.03185e-77	yes	up	4.32667	9.87	4.91	3.21	4.86	10.72	9.12	9.77	GABPB1-AS1	GABPB1 antisense RNA 1 [Source:HGNC Symbol;Acc:HGNC:44157]
ENSG00000184992	0.379099	-1.39935	9.67516e-79	3.44022e-77	yes	down	14.5933	5.60333	15.11	13.99	14.68	5.54	5.59	5.68	BRI3BP	BRI3 binding protein [Source:HGNC Symbol;Acc:HGNC:14251]
ENSG00000112343	2.2549	1.17306	1.07589e-78	3.81232e-77	yes	up	5.82667	13.35	5.9	6.04	5.54	13.19	13.49	13.37	TRIM38	tripartite motif containing 38 [Source:HGNC Symbol;Acc:HGNC:10059]
ENSG00000187608	5.8599	2.55088	1.29154e-78	4.56858e-77	yes	up	18.3567	111.133	20.09	15.39	19.59	102.36	116.36	114.68	ISG15	ISG15 ubiquitin-like modifier [Source:HGNC Symbol;Acc:HGNC:4053]
ENSG00000104936	2.52808	1.33804	1.3236e-78	4.67391e-77	yes	up	22.21	52.27	22.14	22.23	22.26	58.68	52.06	46.07	DMPK	DM1 protein kinase [Source:HGNC Symbol;Acc:HGNC:2933]
ENSG00000107984	0.271786	-1.87946	5.03072e-78	1.76731e-76	yes	down	62.35	16.7433	71.01	57.92	58.12	14.33	16.77	19.13	DKK1	dickkopf WNT signaling pathway inhibitor 1 [Source:HGNC Symbol;Acc:HGNC:2891]
ENSG00000143067	2.00019	1.00014	7.06612e-78	2.4781e-76	yes	up	12.3367	21.1933	12.49	12.25	12.27	21.52	21.01	21.05	ZNF697	zinc finger protein 697 [Source:HGNC Symbol;Acc:HGNC:32034]
ENSG00000184900	0.498962	-1.003	2.81067e-77	9.82344e-76	yes	down	110.057	55.7533	111.45	107.13	111.59	53.9	56.35	57.01	SUMO3	small ubiquitin-like modifier 3 [Source:HGNC Symbol;Acc:HGNC:11124]
ENSG00000120885	5.60488	2.48668	2.91433e-77	1.01684e-75	yes	up	13.2	80.13	13.98	13.65	11.97	88.43	70.4	81.56	CLU	clusterin [Source:HGNC Symbol;Acc:HGNC:2095]
ENSG00000171208	0.467178	-1.09796	2.94045e-77	1.02421e-75	yes	down	63.3333	30.5933	64.85	62.46	62.69	31.12	29.99	30.67	NETO2	neuropilin and tolloid like 2 [Source:HGNC Symbol;Acc:HGNC:14644]
ENSG00000197905	0.406313	-1.29934	3.47126e-77	1.20704e-75	yes	down	58.05	23.6867	60.82	56.77	56.56	24.73	23.98	22.35	TEAD4	TEA domain transcription factor 4 [Source:HGNC Symbol;Acc:HGNC:11717]
ENSG00000077152	0.267153	-1.90426	4.50703e-77	1.5619e-75	yes	down	84.9833	23.5767	89.72	82.64	82.59	22.06	24.05	24.62	UBE2T	ubiquitin conjugating enzyme E2 T [Source:HGNC Symbol;Acc:HGNC:25009]
ENSG00000048052	2.12903	1.0902	5.85555e-77	2.02239e-75	yes	up	17.65	39.3633	17.61	18.05	17.29	39.26	39.13	39.7	HDAC9	histone deacetylase 9 [Source:HGNC Symbol;Acc:HGNC:14065]
ENSG00000259207	0.176829	-2.49957	8.23063e-77	2.83313e-75	yes	down	10.7567	1.88	9.93	11.78	10.56	1.76	1.94	1.94	ITGB3	integrin subunit beta 3 [Source:HGNC Symbol;Acc:HGNC:6156]
ENSG00000177602	0.192787	-2.37492	3.54774e-76	1.21507e-74	yes	down	13.1933	2.65333	13.98	11.43	14.17	2.48	2.75	2.73	HASPIN	histone H3 associated protein kinase [Source:HGNC Symbol;Acc:HGNC:19682]
ENSG00000255717	0.449964	-1.15212	6.96076e-76	2.38002e-74	yes	down	219.017	105.5	223.9	210.04	223.11	105.99	106.65	103.86	SNHG1	small nucleolar RNA host gene 1 [Source:HGNC Symbol;Acc:HGNC:32688]
ENSG00000164687	0.392344	-1.34981	7.22073e-76	2.4648e-74	yes	down	268.413	107.293	283.31	263.12	258.81	103.93	113.65	104.3	FABP5	fatty acid binding protein 5 [Source:HGNC Symbol;Acc:HGNC:3560]
ENSG00000243742	13.6597	3.77185	1.57283e-75	5.351e-74	yes	up	0.796667	8.29333	0.42	0.59	1.38	8.61	7.65	8.62	RPLP0P2	ribosomal protein lateral stalk subunit P0 pseudogene 2 [Source:HGNC Symbol;Acc:HGNC:17960]
ENSG00000164045	0.17084	-2.54928	3.53801e-75	1.20169e-73	yes	down	11.6467	2.02333	13.22	10.14	11.58	1.89	2.16	2.02	CDC25A	cell division cycle 25A [Source:HGNC Symbol;Acc:HGNC:1725]
ENSG00000204389	2.63668	1.39872	5.87482e-75	1.99209e-73	yes	up	37.4467	100.61	42.55	35.95	33.84	105.96	105.56	90.31	HSPA1A	heat shock protein family A (Hsp70) member 1A [Source:HGNC Symbol;Acc:HGNC:5232]
ENSG00000205476	0.403871	-1.30803	9.96302e-75	3.3672e-73	yes	down	31.3233	9.29667	33.74	30.35	29.88	8.81	10.36	8.72	CCDC85C	coiled-coil domain containing 85C [Source:HGNC Symbol;Acc:HGNC:35459]
ENSG00000261236	0.462787	-1.11158	1.84949e-74	6.20974e-73	yes	down	69.5367	30.1033	76.01	67.4	65.2	31.54	29.41	29.36	BOP1	BOP1 ribosomal biogenesis factor [Source:HGNC Symbol;Acc:HGNC:15519]
ENSG00000104356	0.363849	-1.45859	5.79164e-74	1.9319e-72	yes	down	21.6933	8.25333	23.01	20.73	21.34	8.91	9	6.85	POP1	POP1 homolog, ribonuclease P/MRP subunit [Source:HGNC Symbol;Acc:HGNC:30129]
ENSG00000163918	0.338324	-1.56352	6.12219e-74	2.03884e-72	yes	down	106.787	35.4133	107.82	97.58	114.96	36.81	38.6	30.83	RFC4	replication factor C subunit 4 [Source:HGNC Symbol;Acc:HGNC:9972]
ENSG00000166803	0.186322	-2.42413	1.46366e-73	4.84285e-72	yes	down	86.66	16.53	98.14	74.91	86.93	12.95	16.27	20.37	PCLAF	PCNA clamp associated factor [Source:HGNC Symbol;Acc:HGNC:28961]
ENSG00000111445	0.389172	-1.36152	2.15066e-73	7.09302e-72	yes	down	50.2567	20.7333	51.7	48.47	50.6	20.22	20.4	21.58	RFC5	replication factor C subunit 5 [Source:HGNC Symbol;Acc:HGNC:9973]
ENSG00000131462	0.452874	-1.14282	2.17078e-73	7.14788e-72	yes	down	103.887	48.48	110.77	104.93	95.96	51.51	45.9	48.03	TUBG1	tubulin gamma 1 [Source:HGNC Symbol;Acc:HGNC:12417]
ENSG00000134574	2.22191	1.1518	4.81168e-73	1.57174e-71	yes	up	33.1633	70.18	34.45	36.12	28.92	64.57	76.49	69.48	DDB2	damage specific DNA binding protein 2 [Source:HGNC Symbol;Acc:HGNC:2718]
ENSG00000115884	0.405497	-1.30224	8.32927e-73	2.7078e-71	yes	down	46.09	19.4367	45.91	45.79	46.57	18.45	17.93	21.93	SDC1	syndecan 1 [Source:HGNC Symbol;Acc:HGNC:10658]
ENSG00000122483	0.268883	-1.89495	1.15109e-72	3.7362e-71	yes	down	20.0167	5.80333	19.62	19.79	20.64	4.22	6.14	7.05	CCDC18	coiled-coil domain containing 18 [Source:HGNC Symbol;Acc:HGNC:30370]
ENSG00000177169	2.02252	1.01616	1.64771e-72	5.33966e-71	yes	up	19.73	41.92	20	19.26	19.93	40.82	41.24	43.7	ULK1	unc-51 like autophagy activating kinase 1 [Source:HGNC Symbol;Acc:HGNC:12558]
ENSG00000123933	2.67253	1.41821	3.9758e-72	1.28436e-70	yes	up	9.77	23.44	10.64	10.46	8.21	25.08	21.58	23.66	MXD4	MAX dimerization protein 4 [Source:HGNC Symbol;Acc:HGNC:13906]
ENSG00000197608	3.06605	1.61638	9.28462e-72	2.98522e-70	yes	up	6.79333	17.21	6.39	7.92	6.07	17.37	15.7	18.56	ZNF841	zinc finger protein 841 [Source:HGNC Symbol;Acc:HGNC:27611]
ENSG00000172071	2.75554	1.46233	1.20836e-71	3.8549e-70	yes	up	7.86333	19.04	7.19	7.5	8.9	18.32	21.34	17.46	EIF2AK3	eukaryotic translation initiation factor 2 alpha kinase 3 [Source:HGNC Symbol;Acc:HGNC:3255]
ENSG00000210151	0.473107	-1.07976	1.8873e-71	6.01149e-70	yes	down	217.79	104.643	229.64	218.66	205.07	102.65	108.08	103.2	MT-TS1	mitochondrially encoded tRNA-Ser (UCN) 1 [Source:HGNC Symbol;Acc:HGNC:7497]
ENSG00000265415	0.217001	-2.20422	2.34642e-71	7.46227e-70	yes	down	68.8133	14.7367	64.43	67.35	74.66	14.18	16.24	13.79	AC099850.3	novel transcript, antisense to PRR11
ENSG00000156804	5.6543	2.49935	2.89129e-71	9.18085e-70	yes	up	14.0033	59.57	13.24	13.48	15.29	58.87	61.62	58.22	FBXO32	F-box protein 32 [Source:HGNC Symbol;Acc:HGNC:16731]
ENSG00000147536	0.283659	-1.81777	2.98916e-71	9.47694e-70	yes	down	29.67	8.98333	30.45	29.93	28.63	10.75	7.67	8.53	GINS4	GINS complex subunit 4 [Source:HGNC Symbol;Acc:HGNC:28226]
ENSG00000132510	3.34473	1.74189	3.38593e-71	1.07183e-69	yes	up	3.14333	9.86667	2.62	3.95	2.86	9.55	10.15	9.9	KDM6B	lysine demethylase 6B [Source:HGNC Symbol;Acc:HGNC:29012]
ENSG00000120539	0.397456	-1.33113	4.68118e-71	1.47728e-69	yes	down	28.8833	11.47	29.72	28.3	28.63	11.15	11.76	11.5	MASTL	microtubule associated serine/threonine kinase like [Source:HGNC Symbol;Acc:HGNC:19042]
ENSG00000066455	2.05174	1.03685	5.09706e-71	1.60358e-69	yes	up	27.7667	58.99	26.94	26.94	29.42	58.6	57.96	60.41	GOLGA5	golgin A5 [Source:HGNC Symbol;Acc:HGNC:4428]
ENSG00000185551	0.450801	-1.14944	6.29623e-71	1.97478e-69	yes	down	41.25	18.8267	41.65	39.18	42.92	20.68	18.74	17.06	NR2F2	nuclear receptor subfamily 2 group F member 2 [Source:HGNC Symbol;Acc:HGNC:7976]
ENSG00000124587	2.9964	1.58323	6.56605e-71	2.05626e-69	yes	up	6.81	20.7967	6.83	7.11	6.49	19.7	20.9	21.79	PEX6	peroxisomal biogenesis factor 6 [Source:HGNC Symbol;Acc:HGNC:8859]
ENSG00000171792	0.428272	-1.2234	9.54179e-71	2.98359e-69	yes	down	61.43	27.49	61.59	62.16	60.54	27.58	27.59	27.3	RHNO1	RAD9-HUS1-RAD1 interacting nuclear orphan 1 [Source:HGNC Symbol;Acc:HGNC:28206]
ENSG00000274512	4.51533	2.17483	2.19999e-70	6.84772e-69	yes	up	4.11	19.2433	4.03	4.15	4.15	19.18	19.2	19.35	TBC1D3L	TBC1 domain family member 3L [Source:HGNC Symbol;Acc:HGNC:51246]
ENSG00000168394	2.69277	1.42909	4.21912e-70	1.31126e-68	yes	up	13.5567	37.16	13.31	13.73	13.63	39.39	34.28	37.81	TAP1	transporter 1, ATP binding cassette subfamily B member [Source:HGNC Symbol;Acc:HGNC:43]
ENSG00000272068	5.2096	2.38117	8.42684e-70	2.61105e-68	yes	up	2.56333	13.59	2.47	2.81	2.41	14.78	11.66	14.33	AL365181.2	novel transcript
ENSG00000128973	0.215729	-2.21271	1.3752e-69	4.23541e-68	yes	down	30.6067	7.37667	36.49	29.45	25.88	8.48	6.94	6.71	CLN6	CLN6, transmembrane ER protein [Source:HGNC Symbol;Acc:HGNC:2077]
ENSG00000136982	0.216037	-2.21065	1.55775e-69	4.79043e-68	yes	down	20.5	4.51333	20.43	19.72	21.35	5.22	4.23	4.09	DSCC1	DNA replication and sister chromatid cohesion 1 [Source:HGNC Symbol;Acc:HGNC:24453]
ENSG00000137821	5.12877	2.35861	1.62793e-69	4.99873e-68	yes	up	3.57667	21.2833	3.28	3.57	3.88	19.91	23.44	20.5	LRRC49	leucine rich repeat containing 49 [Source:HGNC Symbol;Acc:HGNC:25965]
ENSG00000124788	2.55258	1.35195	2.99792e-69	9.16425e-68	yes	up	4.72333	11.4767	4.44	4.59	5.14	11.83	10.26	12.34	ATXN1	ataxin 1 [Source:HGNC Symbol;Acc:HGNC:10548]
ENSG00000064687	2.81652	1.49391	3.29595e-69	1.00602e-67	yes	up	7.78667	20.1533	8.98	6.99	7.39	20.2	17.39	22.87	ABCA7	ATP binding cassette subfamily A member 7 [Source:HGNC Symbol;Acc:HGNC:37]
ENSG00000130363	3.02409	1.5965	8.12614e-69	2.47666e-67	yes	up	4.21333	11.89	3.65	4.71	4.28	12.93	11.18	11.56	RSPH3	radial spoke head 3 homolog [Source:HGNC Symbol;Acc:HGNC:21054]
ENSG00000138346	0.249714	-2.00165	3.73586e-68	1.13187e-66	yes	down	12.9467	3.26333	12.2	12.3	14.34	3.58	3.39	2.82	DNA2	DNA replication helicase/nuclease 2 [Source:HGNC Symbol;Acc:HGNC:2939]
ENSG00000085840	0.220149	-2.18345	4.13497e-68	1.24725e-66	yes	down	18.4167	4.12667	21.79	17.69	15.77	3.94	4.19	4.25	ORC1	origin recognition complex subunit 1 [Source:HGNC Symbol;Acc:HGNC:8487]
ENSG00000106785	0.394023	-1.34365	7.45768e-68	2.23632e-66	yes	down	19.8633	7.86	20.02	19.7	19.87	7.35	8.22	8.01	TRIM14	tripartite motif containing 14 [Source:HGNC Symbol;Acc:HGNC:16283]
ENSG00000140534	0.260786	-1.93906	1.14849e-67	3.4339e-66	yes	down	8.78	2.16333	9.25	8.51	8.58	2.17	2.02	2.3	TICRR	TOPBP1 interacting checkpoint and replication regulator [Source:HGNC Symbol;Acc:HGNC:28704]
ENSG00000186815	2.26	1.17632	1.54004e-67	4.57123e-66	yes	up	13.5333	32.3733	12.63	13.33	14.64	30.43	34.11	32.58	TPCN1	two pore segment channel 1 [Source:HGNC Symbol;Acc:HGNC:18182]
ENSG00000183287	0.366643	-1.44755	2.15195e-67	6.36909e-66	yes	down	15.2733	4.66	14.47	13.08	18.27	5.13	4.1	4.75	CCBE1	collagen and calcium binding EGF domains 1 [Source:HGNC Symbol;Acc:HGNC:29426]
ENSG00000258947	0.396035	-1.3363	2.33692e-67	6.90657e-66	yes	down	68.8133	28.7767	74.34	66.88	65.22	27.08	30.56	28.69	TUBB3	tubulin beta 3 class III [Source:HGNC Symbol;Acc:HGNC:20772]
ENSG00000110427	0.465042	-1.10457	2.84253e-67	8.38875e-66	yes	down	16.1067	7.66667	17.31	16.86	14.15	7.99	7.1	7.91	KIAA1549L	KIAA1549 like [Source:HGNC Symbol;Acc:HGNC:24836]
ENSG00000120800	0.405796	-1.30117	3.17762e-67	9.36414e-66	yes	down	15.6833	6.47	17.44	14.46	15.15	6.99	6.25	6.17	UTP20	UTP20, small subunit processome component [Source:HGNC Symbol;Acc:HGNC:17897]
ENSG00000108786	3.41482	1.77181	3.63726e-67	1.07033e-65	yes	up	3.93	10.36	4.3	3.91	3.58	10.46	10.16	10.46	HSD17B1	hydroxysteroid 17-beta dehydrogenase 1 [Source:HGNC Symbol;Acc:HGNC:5210]
ENSG00000162377	0.446117	-1.1645	3.80688e-67	1.11863e-65	yes	down	30.7467	15.69	31.17	29.95	31.12	15.32	15.38	16.37	COA7	cytochrome c oxidase assembly factor 7 (putative) [Source:HGNC Symbol;Acc:HGNC:25716]
ENSG00000113356	0.432743	-1.20842	6.16616e-67	1.80671e-65	yes	down	40.8067	17.8033	40.34	39.77	42.31	17.24	16.66	19.51	POLR3G	RNA polymerase III subunit G [Source:HGNC Symbol;Acc:HGNC:30075]
ENSG00000168827	0.484792	-1.04456	7.09259e-67	2.07519e-65	yes	down	55.5467	28.7633	57.33	53.48	55.83	28.03	27.48	30.78	GFM1	G elongation factor mitochondrial 1 [Source:HGNC Symbol;Acc:HGNC:13780]
ENSG00000150893	0.126817	-2.97918	1.70523e-66	4.95387e-65	yes	down	1.93	0.23	1.91	1.94	1.94	0.21	0.2	0.28	FREM2	FRAS1 related extracellular matrix protein 2 [Source:HGNC Symbol;Acc:HGNC:25396]
ENSG00000138376	0.210993	-2.24474	3.17951e-66	9.19768e-65	yes	down	23.3633	1.76667	10.65	9.43	50.01	2.25	1.37	1.68	BARD1	BRCA1 associated RING domain 1 [Source:HGNC Symbol;Acc:HGNC:952]
ENSG00000152409	2.43653	1.28483	3.68874e-66	1.06557e-64	yes	up	6.60333	16.3167	5.71	7.22	6.88	16.19	16.23	16.53	JMY	junction mediating and regulatory protein, p53 cofactor [Source:HGNC Symbol;Acc:HGNC:28916]
ENSG00000107566	0.495951	-1.01173	3.74064e-66	1.07904e-64	yes	down	53.66	27.7167	54.8	52.26	53.92	27.39	27.69	28.07	ERLIN1	ER lipid raft associated 1 [Source:HGNC Symbol;Acc:HGNC:16947]
ENSG00000221963	2.12538	1.08772	4.55316e-66	1.30974e-64	yes	up	5.60667	12.1633	5.56	5.7	5.56	11.71	12.42	12.36	APOL6	apolipoprotein L6 [Source:HGNC Symbol;Acc:HGNC:14870]
ENSG00000173546	0.402263	-1.31379	4.81522e-66	1.38318e-64	yes	down	11.9233	4.87333	12.47	12.4	10.9	4.67	5.02	4.93	CSPG4	chondroitin sulfate proteoglycan 4 [Source:HGNC Symbol;Acc:HGNC:2466]
ENSG00000154839	0.166528	-2.58617	8.1752e-66	2.33849e-64	yes	down	15.3067	2.60667	15.65	14.26	16.01	2.5	3	2.32	SKA1	spindle and kinetochore associated complex subunit 1 [Source:HGNC Symbol;Acc:HGNC:28109]
ENSG00000101868	0.289417	-1.78878	1.32571e-65	3.77633e-64	yes	down	9.76333	2.94667	9.59	9.48	10.22	2.86	2.82	3.16	POLA1	DNA polymerase alpha 1, catalytic subunit [Source:HGNC Symbol;Acc:HGNC:9173]
ENSG00000010404	2.14226	1.09913	1.38644e-65	3.94383e-64	yes	up	22.6267	34.3733	23.09	24.12	20.67	34.81	35.62	32.69	IDS	iduronate 2-sulfatase [Source:HGNC Symbol;Acc:HGNC:5389]
ENSG00000100242	0.421931	-1.24492	3.09976e-65	8.78095e-64	yes	down	37.7067	19.6367	37.13	39.43	36.56	17.95	22.39	18.57	SUN2	Sad1 and UNC84 domain containing 2 [Source:HGNC Symbol;Acc:HGNC:14210]
ENSG00000234616	0.33827	-1.56375	6.01878e-65	1.70263e-63	yes	down	13.7533	4.57	14.98	14.01	12.27	4.78	4.45	4.48	JRK	Jrk helix-turn-helix protein [Source:HGNC Symbol;Acc:HGNC:6199]
ENSG00000154928	0.366823	-1.44684	2.4744e-64	6.96129e-63	yes	down	16.5167	6.38667	16.46	16.93	16.16	5.52	7.44	6.2	EPHB1	EPH receptor B1 [Source:HGNC Symbol;Acc:HGNC:3392]
ENSG00000065618	0.123743	-3.01458	2.75188e-64	7.73132e-63	yes	down	13.52	1.75667	13.38	13.29	13.89	1.63	1.59	2.05	COL17A1	collagen type XVII alpha 1 chain [Source:HGNC Symbol;Acc:HGNC:2194]
ENSG00000131080	2.46216	1.29992	3.13019e-64	8.7821e-63	yes	up	9.76667	24.44	9.59	10.19	9.52	24.43	24.4	24.49	EDA2R	ectodysplasin A2 receptor [Source:HGNC Symbol;Acc:HGNC:17756]
ENSG00000132199	0.413689	-1.27338	3.51241e-64	9.82756e-63	yes	down	46.3567	18.58	44.66	48.77	45.64	23.37	17.32	15.05	ENOSF1	enolase superfamily member 1 [Source:HGNC Symbol;Acc:HGNC:30365]
ENSG00000072657	0.420699	-1.24914	7.35454e-64	2.04658e-62	yes	down	11.25	3.88333	12.75	8.56	12.44	3.48	4.46	3.71	TRHDE	thyrotropin releasing hormone degrading enzyme [Source:HGNC Symbol;Acc:HGNC:30748]
ENSG00000138796	0.301432	-1.7301	8.01837e-64	2.22828e-62	yes	down	29.33	8.79	28.83	28.75	30.41	8.5	8.47	9.4	HADH	hydroxyacyl-CoA dehydrogenase [Source:HGNC Symbol;Acc:HGNC:4799]
ENSG00000204767	0.329731	-1.60064	1.8507e-63	5.12912e-62	yes	down	15.2567	5.10667	17.6	14.33	13.84	5.28	5.01	5.03	INSYN2B	inhibitory synaptic factor family member 2B [Source:HGNC Symbol;Acc:HGNC:37271]
ENSG00000136928	0.327797	-1.60913	6.21541e-63	1.7156e-61	yes	down	12.2333	3.44667	12.18	12.67	11.85	3.33	3.49	3.52	GABBR2	gamma-aminobutyric acid type B receptor subunit 2 [Source:HGNC Symbol;Acc:HGNC:4507]
ENSG00000253846	2.23136	1.15792	6.74428e-63	1.85908e-61	yes	up	11.29	25.6433	11.77	11.76	10.34	26.6	25.24	25.09	PCDHGA10	protocadherin gamma subfamily A, 10 [Source:HGNC Symbol;Acc:HGNC:8697]
ENSG00000198517	2.09417	1.06638	1.09015e-62	2.99293e-61	yes	up	16.3033	32.5233	15.27	16.18	17.46	33.19	31.93	32.45	MAFK	MAF bZIP transcription factor K [Source:HGNC Symbol;Acc:HGNC:6782]
ENSG00000162302	0.462032	-1.11394	1.30061e-62	3.55644e-61	yes	down	36.9433	17.1667	37.83	36.81	36.19	17.49	16.93	17.08	RPS6KA4	ribosomal protein S6 kinase A4 [Source:HGNC Symbol;Acc:HGNC:10433]
ENSG00000179041	0.489931	-1.02935	1.87373e-62	5.10316e-61	yes	down	89.29	44.4733	92.77	85.49	89.61	44.76	45.54	43.12	RRS1	ribosome biogenesis regulator homolog [Source:HGNC Symbol;Acc:HGNC:17083]
ENSG00000140365	0.353133	-1.50172	2.09208e-62	5.68275e-61	yes	down	102.15	35.27	110.15	100.91	95.39	35.68	35.93	34.2	COMMD4	COMM domain containing 4 [Source:HGNC Symbol;Acc:HGNC:26027]
ENSG00000072501	0.473201	-1.07947	9.58444e-62	2.57949e-60	yes	down	26.4267	15.11	30.85	24.1	24.33	14.45	14.88	16	SMC1A	structural maintenance of chromosomes 1A [Source:HGNC Symbol;Acc:HGNC:11111]
ENSG00000111275	3.27652	1.71216	1.15141e-61	3.09071e-60	yes	up	7.42333	23.41	6.54	8.32	7.41	22.99	23.92	23.32	ALDH2	aldehyde dehydrogenase 2 family member [Source:HGNC Symbol;Acc:HGNC:404]
ENSG00000051180	0.213608	-2.22696	1.57786e-61	4.21881e-60	yes	down	22.08	4.71667	23.35	20.91	21.98	4.58	4.53	5.04	RAD51	RAD51 recombinase [Source:HGNC Symbol;Acc:HGNC:9817]
ENSG00000081041	2.97539	1.57308	1.97786e-61	5.28142e-60	yes	up	33.22	97.39	25.44	34.84	39.38	93.17	98.24	100.76	CXCL2	C-X-C motif chemokine ligand 2 [Source:HGNC Symbol;Acc:HGNC:4603]
ENSG00000248508	4.45309	2.15481	2.2727e-61	6.06083e-60	yes	up	1.33333	5.01	1.39	1.17	1.44	5.09	4.9	5.04	SRP14-AS1	SRP14 antisense RNA1 (head to head) [Source:HGNC Symbol;Acc:HGNC:48619]
ENSG00000151651	2.32088	1.21467	2.48352e-61	6.61442e-60	yes	up	14.8233	38.32	13.28	16.34	14.85	36.27	41.42	37.27	ADAM8	ADAM metallopeptidase domain 8 [Source:HGNC Symbol;Acc:HGNC:215]
ENSG00000137331	2.05383	1.03832	3.10709e-61	8.25373e-60	yes	up	145.607	304.773	129.21	146.78	160.83	292.13	317.37	304.82	IER3	immediate early response 3 [Source:HGNC Symbol;Acc:HGNC:5392]
ENSG00000164087	0.271353	-1.88176	3.20996e-61	8.51596e-60	yes	down	25.8833	6.96	25.97	25.9	25.78	6.13	7.19	7.56	POC1A	POC1 centriolar protein A [Source:HGNC Symbol;Acc:HGNC:24488]
ENSG00000122741	2.26836	1.18165	3.91389e-61	1.03566e-59	yes	up	9.15	17.4633	9.39	8.55	9.51	18.34	17.76	16.29	DCAF10	DDB1 and CUL4 associated factor 10 [Source:HGNC Symbol;Acc:HGNC:23686]
ENSG00000120437	0.440975	-1.18123	4.08961e-61	1.08076e-59	yes	down	63.9633	27.5067	69.84	63.65	58.4	25.63	27.01	29.88	ACAT2	acetyl-CoA acetyltransferase 2 [Source:HGNC Symbol;Acc:HGNC:94]
ENSG00000164744	9.51114	3.24962	4.92702e-61	1.30039e-59	yes	up	4.04333	39.72	3.73	3.74	4.66	37.35	37.66	44.15	SUN3	Sad1 and UNC84 domain containing 3 [Source:HGNC Symbol;Acc:HGNC:22429]
ENSG00000131876	0.425092	-1.23415	7.8105e-61	2.05086e-59	yes	down	99.3333	40.4367	98.81	98.1	101.09	39.51	39.2	42.6	SNRPA1	small nuclear ribonucleoprotein polypeptide A' [Source:HGNC Symbol;Acc:HGNC:11152]
ENSG00000166451	0.431822	-1.21149	9.73228e-61	2.54894e-59	yes	down	119.847	45.9133	118.02	99.08	142.44	48.01	51.66	38.07	CENPN	centromere protein N [Source:HGNC Symbol;Acc:HGNC:30873]
ENSG00000185697	0.445751	-1.16569	1.07901e-60	2.82236e-59	yes	down	23.88	10.4467	24.26	21.3	26.08	10.63	10.63	10.08	MYBL1	MYB proto-oncogene like 1 [Source:HGNC Symbol;Acc:HGNC:7547]
ENSG00000131153	0.100444	-3.31553	1.32875e-60	3.47119e-59	yes	down	10.3033	1.26667	12.42	9.81	8.68	1.41	0.86	1.53	GINS2	GINS complex subunit 2 [Source:HGNC Symbol;Acc:HGNC:24575]
ENSG00000126216	0.403526	-1.30927	1.37228e-60	3.58034e-59	yes	down	23.76	10.2867	23.62	23.34	24.32	10.35	9.06	11.45	TUBGCP3	tubulin gamma complex associated protein 3 [Source:HGNC Symbol;Acc:HGNC:18598]
ENSG00000105856	2.54201	1.34597	1.43923e-60	3.74548e-59	yes	up	13.77	34.3633	12.48	15.48	13.35	31.91	37.25	33.93	HBP1	HMG-box transcription factor 1 [Source:HGNC Symbol;Acc:HGNC:23200]
ENSG00000166250	0.408135	-1.29288	2.67276e-60	6.938e-59	yes	down	20.0567	8.69667	19.91	20.28	19.98	8.56	9.29	8.24	CLMP	CXADR like membrane protein [Source:HGNC Symbol;Acc:HGNC:24039]
ENSG00000127663	2.38963	1.25679	3.80344e-60	9.86054e-59	yes	up	6.17	14.4367	6.05	5.96	6.5	14.57	14.47	14.27	KDM4B	lysine demethylase 4B [Source:HGNC Symbol;Acc:HGNC:29136]
ENSG00000231298	0.398926	-1.32581	3.97923e-60	1.02902e-58	yes	down	36.6	14.0567	40.46	34.55	34.79	13.03	16.47	12.67	MANCR	mitotically associated long non coding RNA [Source:HGNC Symbol;Acc:HGNC:44678]
ENSG00000109084	0.195032	-2.35822	4.13453e-60	1.06784e-58	yes	down	15.3167	3.34	17.29	13.29	15.37	3.08	3.94	3	TMEM97	transmembrane protein 97 [Source:HGNC Symbol;Acc:HGNC:28106]
ENSG00000129667	2.61126	1.38474	4.49153e-60	1.15858e-58	yes	up	13.77	38.1467	14.92	13.62	12.77	34.97	37.62	41.85	RHBDF2	rhomboid 5 homolog 2 [Source:HGNC Symbol;Acc:HGNC:20788]
ENSG00000108840	2.59193	1.37403	5.03222e-60	1.29641e-58	yes	up	10.6267	28.3967	9.11	12.59	10.18	29.34	28.49	27.36	HDAC5	histone deacetylase 5 [Source:HGNC Symbol;Acc:HGNC:14068]
ENSG00000156509	0.114976	-3.1206	1.53681e-59	3.91973e-58	yes	down	5.48667	0.693333	4.94	5.85	5.67	0.53	0.88	0.67	FBXO43	F-box protein 43 [Source:HGNC Symbol;Acc:HGNC:28521]
ENSG00000165490	0.287901	-1.79635	1.56451e-59	3.98541e-58	yes	down	15.1233	4.51	15.6	14.44	15.33	4.13	4.46	4.94	DDIAS	DNA damage induced apoptosis suppressor [Source:HGNC Symbol;Acc:HGNC:26351]
ENSG00000020922	0.468851	-1.0928	2.8837e-59	7.32767e-58	yes	down	35.14	12.1033	36.62	37.65	31.15	12.57	10.7	13.04	MRE11	MRE11 homolog, double strand break repair nuclease [Source:HGNC Symbol;Acc:HGNC:7230]
ENSG00000101224	0.489869	-1.02953	3.65417e-59	9.25105e-58	yes	down	39.5967	14.2	38.44	40.42	39.93	14.15	14.12	14.33	CDC25B	cell division cycle 25B [Source:HGNC Symbol;Acc:HGNC:1726]
ENSG00000138031	0.247183	-2.01635	4.09453e-59	1.03531e-57	yes	down	13.8333	3.27333	12.29	16.2	13.01	2.87	3.46	3.49	ADCY3	adenylate cyclase 3 [Source:HGNC Symbol;Acc:HGNC:234]
ENSG00000167513	0.284222	-1.81491	4.90029e-59	1.236e-57	yes	down	21.2167	6.43	23.13	20.06	20.46	6.45	6.43	6.41	CDT1	chromatin licensing and DNA replication factor 1 [Source:HGNC Symbol;Acc:HGNC:24576]
ENSG00000114784	2.03362	1.02405	4.95948e-59	1.24939e-57	yes	up	94.5767	197.003	85.66	98.31	99.76	192.01	198.68	200.32	EIF1B	eukaryotic translation initiation factor 1B [Source:HGNC Symbol;Acc:HGNC:30792]
ENSG00000167747	0.491262	-1.02544	6.37268e-59	1.60146e-57	yes	down	131.84	65.5567	137.26	133.6	124.66	66.85	62.18	67.64	C19orf48	chromosome 19 open reading frame 48 [Source:HGNC Symbol;Acc:HGNC:29667]
ENSG00000162298	2.15936	1.1106	6.70918e-59	1.68396e-57	yes	up	16.7733	36.5933	17.17	16.41	16.74	35.66	35.89	38.23	SYVN1	synoviolin 1 [Source:HGNC Symbol;Acc:HGNC:20738]
ENSG00000115267	3.69401	1.88519	7.87759e-59	1.9748e-57	yes	up	4.47667	15.5867	4.23	4.79	4.41	16.44	14.86	15.46	IFIH1	interferon induced with helicase C domain 1 [Source:HGNC Symbol;Acc:HGNC:18873]
ENSG00000196584	0.194798	-2.35995	9.13244e-59	2.28657e-57	yes	down	4.97333	1.01667	5.52	4.61	4.79	0.89	1.02	1.14	XRCC2	X-ray repair cross complementing 2 [Source:HGNC Symbol;Acc:HGNC:12829]
ENSG00000102900	0.495361	-1.01345	9.47226e-59	2.36876e-57	yes	down	64.8933	35.14	65.78	64.28	64.62	39.3	30.89	35.23	NUP93	nucleoporin 93 [Source:HGNC Symbol;Acc:HGNC:28958]
ENSG00000119669	2.09642	1.06793	1.165e-58	2.90625e-57	yes	up	14.11	30.1367	13.89	14.21	14.23	29.48	29.08	31.85	IRF2BPL	interferon regulatory factor 2 binding protein like [Source:HGNC Symbol;Acc:HGNC:14282]
ENSG00000138658	0.225313	-2.15	1.16825e-58	2.91081e-57	yes	down	9.14667	2.68333	9.9	8.33	9.21	2.32	2.95	2.78	ZGRF1	zinc finger GRF-type containing 1 [Source:HGNC Symbol;Acc:HGNC:25654]
ENSG00000104951	8.11609	3.02078	1.18991e-58	2.96119e-57	yes	up	1.90333	14.77	1.52	2.25	1.94	15.48	15.65	13.18	IL4I1	interleukin 4 induced 1 [Source:HGNC Symbol;Acc:HGNC:19094]
ENSG00000055163	2.06241	1.04433	1.64264e-58	4.07299e-57	yes	up	14.8567	30.0267	17.73	14.42	12.42	29.87	30.26	29.95	CYFIP2	cytoplasmic FMR1 interacting protein 2 [Source:HGNC Symbol;Acc:HGNC:13760]
ENSG00000132003	2.44197	1.28805	1.72221e-58	4.26512e-57	yes	up	9.47	22.23	9.08	9.58	9.75	21.66	22.2	22.83	ZSWIM4	zinc finger SWIM-type containing 4 [Source:HGNC Symbol;Acc:HGNC:25704]
ENSG00000198857	5.9691	2.57751	1.8182e-58	4.49741e-57	yes	up	0.33	1.96667	0.32	0.3	0.37	2.23	1.75	1.92	HSD3BP5	hydroxy-delta-5-steroid dehydrogenase, 3 beta, pseudogene 5 [Source:HGNC Symbol;Acc:HGNC:5223]
ENSG00000258590	29.1314	4.86451	2.13412e-58	5.27248e-57	yes	up	0.206667	4.92667	0.16	0.22	0.24	5.12	5.23	4.43	NBEAP1	neurobeachin pseudogene 1 [Source:HGNC Symbol;Acc:HGNC:1007]
ENSG00000116120	0.490039	-1.02903	2.34195e-58	5.77897e-57	yes	down	31.09	15.2967	33.5	30.18	29.59	14.96	15.58	15.35	FARSB	phenylalanyl-tRNA synthetase subunit beta [Source:HGNC Symbol;Acc:HGNC:17800]
ENSG00000091651	0.292087	-1.77553	2.5584e-58	6.30548e-57	yes	down	44.1233	12.4867	47.37	38.8	46.2	10.93	12.21	14.32	ORC6	origin recognition complex subunit 6 [Source:HGNC Symbol;Acc:HGNC:17151]
ENSG00000025770	0.345929	-1.53145	3.87302e-58	9.4998e-57	yes	down	25.55	10.3533	26.33	25.77	24.55	10.53	10.29	10.24	NCAPH2	non-SMC condensin II complex subunit H2 [Source:HGNC Symbol;Acc:HGNC:25071]
ENSG00000258727	6.49634	2.69963	9.02079e-58	2.19946e-56	yes	up	1.34667	9.21333	1.41	1.61	1.02	9.85	8.26	9.53	AL135999.1	novel transcript, antisense to AP1G2
ENSG00000188610	0.187223	-2.41717	9.66433e-58	2.35357e-56	yes	down	15.3367	3.50667	16.77	15.2	14.04	3.25	4.87	2.4	FAM72B	family with sequence similarity 72 member B [Source:HGNC Symbol;Acc:HGNC:24805]
ENSG00000140451	0.0492402	-4.34402	2.8297e-57	6.87487e-56	yes	down	10.7067	0.493333	10.19	9.84	12.09	0.44	0.52	0.52	PIF1	PIF1 5'-to-3' DNA helicase [Source:HGNC Symbol;Acc:HGNC:26220]
ENSG00000198056	0.454334	-1.13817	3.55719e-57	8.61168e-56	yes	down	64.44	25.0667	64.41	62.92	65.99	25.99	22.88	26.33	PRIM1	DNA primase subunit 1 [Source:HGNC Symbol;Acc:HGNC:9369]
ENSG00000119801	2.00452	1.00325	4.99776e-57	1.20706e-55	yes	up	33.6433	67.0667	31.42	34.57	34.94	67.57	63.62	70.01	YPEL5	yippee like 5 [Source:HGNC Symbol;Acc:HGNC:18329]
ENSG00000132274	2.46565	1.30197	7.06745e-57	1.70292e-55	yes	up	18.49	40.97	18.99	18.06	18.42	43.37	37.06	42.48	TRIM22	tripartite motif containing 22 [Source:HGNC Symbol;Acc:HGNC:16379]
ENSG00000274049	4.83062	2.27221	7.27975e-57	1.75202e-55	yes	up	3.88667	18.7233	5.12	3.21	3.33	17.23	20.4	18.54	INO80B-WBP1	INO80B-WBP1 readthrough (NMD candidate) [Source:HGNC Symbol;Acc:HGNC:49199]
ENSG00000144655	2.13347	1.0932	1.12845e-56	2.71266e-55	yes	up	15.4633	33.2867	15.66	15.61	15.12	34.59	32.68	32.59	CSRNP1	cysteine and serine rich nuclear protein 1 [Source:HGNC Symbol;Acc:HGNC:14300]
ENSG00000213853	0.159736	-2.64624	2.99618e-56	7.16879e-55	yes	down	7.45333	1.28333	7.61	7.33	7.42	1.14	1.72	0.99	EMP2	epithelial membrane protein 2 [Source:HGNC Symbol;Acc:HGNC:3334]
ENSG00000131778	0.420269	-1.25062	4.38116e-56	1.04703e-54	yes	down	38.2433	15.0233	37.36	39.22	38.15	13.42	15.88	15.77	CHD1L	chromodomain helicase DNA binding protein 1 like [Source:HGNC Symbol;Acc:HGNC:1916]
ENSG00000012963	0.450994	-1.14882	4.85002e-56	1.15773e-54	yes	down	33.23	14.3333	36.18	31.78	31.73	14.17	14.38	14.45	UBR7	ubiquitin protein ligase E3 component n-recognin 7 (putative) [Source:HGNC Symbol;Acc:HGNC:20344]
ENSG00000114270	3.32926	1.7352	5.34405e-56	1.27269e-54	yes	up	3.08667	10.35	2.73	3.39	3.14	9.35	10.6	11.1	COL7A1	collagen type VII alpha 1 chain [Source:HGNC Symbol;Acc:HGNC:2214]
ENSG00000125450	0.459119	-1.12306	5.93496e-56	1.41178e-54	yes	down	55.27	27.4867	55.47	55.99	54.35	32.03	23.81	26.62	NUP85	nucleoporin 85 [Source:HGNC Symbol;Acc:HGNC:8734]
ENSG00000073150	3.72577	1.89754	7.6777e-56	1.8221e-54	yes	up	3.44667	13.07	3.64	3.23	3.47	13.39	13.32	12.5	PANX2	pannexin 2 [Source:HGNC Symbol;Acc:HGNC:8600]
ENSG00000150782	2.33264	1.22197	9.03235e-56	2.14111e-54	yes	up	35.4833	90.5933	34.45	34.82	37.18	86.74	94.16	90.88	IL18	interleukin 18 [Source:HGNC Symbol;Acc:HGNC:5986]
ENSG00000104823	2.32908	1.21976	1.32223e-55	3.12708e-54	yes	up	55.4067	129.853	62.87	55.75	47.6	134.4	129.13	126.03	ECH1	enoyl-CoA hydratase 1 [Source:HGNC Symbol;Acc:HGNC:3149]
ENSG00000169826	2.09689	1.06825	2.08748e-55	4.93122e-54	yes	up	13.5967	28.7967	13.83	12.97	13.99	28.22	29.58	28.59	CSGALNACT2	chondroitin sulfate N-acetylgalactosaminyltransferase 2 [Source:HGNC Symbol;Acc:HGNC:24292]
ENSG00000100162	0.11259	-3.15084	2.21559e-55	5.22182e-54	yes	down	39.6567	4.5	44.84	37.25	36.88	5.1	5.77	2.63	CENPM	centromere protein M [Source:HGNC Symbol;Acc:HGNC:18352]
ENSG00000132436	0.423087	-1.24097	2.2372e-55	5.26667e-54	yes	down	33.1267	13.4833	31.61	35.36	32.41	12.93	14.12	13.4	FIGNL1	fidgetin like 1 [Source:HGNC Symbol;Acc:HGNC:13286]
ENSG00000108106	0.460445	-1.1189	3.17043e-55	7.42946e-54	yes	down	122.483	96.3567	99.36	95.83	172.26	81.98	115.35	91.74	UBE2S	ubiquitin conjugating enzyme E2 S [Source:HGNC Symbol;Acc:HGNC:17895]
ENSG00000257242	2.0703	1.04984	4.74357e-55	1.10779e-53	yes	up	28.8333	60.77	26.42	28.66	31.42	57.49	61.45	63.37	LINC01619	long intergenic non-protein coding RNA 1619 [Source:HGNC Symbol;Acc:HGNC:27409]
ENSG00000097046	0.342937	-1.54398	5.36661e-55	1.25044e-53	yes	down	19.21	6.64333	18.55	19.1	19.98	7.06	6.85	6.02	CDC7	cell division cycle 7 [Source:HGNC Symbol;Acc:HGNC:1745]
ENSG00000053372	0.404374	-1.30624	1.17206e-54	2.72475e-53	yes	down	40.19	15.8467	42.77	38.17	39.63	14.58	16.43	16.53	MRTO4	MRT4 homolog, ribosome maturation factor [Source:HGNC Symbol;Acc:HGNC:18477]
ENSG00000101003	0.18936	-2.4008	1.54038e-54	3.56884e-53	yes	down	10.7133	2.29	11.13	10.63	10.38	1.94	2.61	2.32	GINS1	GINS complex subunit 1 [Source:HGNC Symbol;Acc:HGNC:28980]
ENSG00000162430	0.385874	-1.3738	1.92227e-54	4.44356e-53	yes	down	19.8133	7.91333	20.82	20.59	18.03	8.36	8.21	7.17	SELENON	selenoprotein N [Source:HGNC Symbol;Acc:HGNC:15999]
ENSG00000080608	0.41125	-1.28191	2.55673e-54	5.8969e-53	yes	down	47.5867	19.7067	47.28	44.26	51.22	18.92	20.76	19.44	PUM3	pumilio RNA binding family member 3 [Source:HGNC Symbol;Acc:HGNC:29676]
ENSG00000160179	4.47292	2.16122	2.68597e-54	6.18801e-53	yes	up	2.72333	12.7167	2.25	3.03	2.89	13.21	12.64	12.3	ABCG1	ATP binding cassette subfamily G member 1 [Source:HGNC Symbol;Acc:HGNC:73]
ENSG00000136153	0.378386	-1.40207	2.76314e-54	6.35863e-53	yes	down	19.8433	7.77	19.68	18.87	20.98	9.02	7.09	7.2	LMO7	LIM domain 7 [Source:HGNC Symbol;Acc:HGNC:6646]
ENSG00000205918	2.99941	1.58468	2.92403e-54	6.72134e-53	yes	up	1.97	4.87	2.14	2.01	1.76	4.41	4.26	5.94	PDPK2P	3-phosphoinositide dependent protein kinase 2, pseudogene [Source:HGNC Symbol;Acc:HGNC:49897]
ENSG00000049249	10.5889	3.40448	4.03177e-54	9.23654e-53	yes	up	0.596667	8.42	0.32	0.6	0.87	16.47	4.49	4.3	TNFRSF9	TNF receptor superfamily member 9 [Source:HGNC Symbol;Acc:HGNC:11924]
ENSG00000138193	0.390467	-1.35673	6.23643e-54	1.42078e-52	yes	down	7.26667	2.47667	8.13	7.06	6.61	2.91	2.44	2.08	PLCE1	phospholipase C epsilon 1 [Source:HGNC Symbol;Acc:HGNC:17175]
ENSG00000109861	0.492593	-1.02153	6.37142e-54	1.44992e-52	yes	down	73.3	34.7133	81.38	69.17	69.35	31.18	36.46	36.5	CTSC	cathepsin C [Source:HGNC Symbol;Acc:HGNC:2528]
ENSG00000164576	2.38429	1.25356	1.31926e-53	2.98232e-52	yes	up	17.6467	22.5	12.85	22.07	18.02	25.49	20.27	21.74	SAP30L	SAP30 like [Source:HGNC Symbol;Acc:HGNC:25663]
ENSG00000162616	2.31814	1.21297	1.43269e-53	3.2316e-52	yes	up	24.5933	52.0367	28.25	22.61	22.92	49.77	53.84	52.5	DNAJB4	DnaJ heat shock protein family (Hsp40) member B4 [Source:HGNC Symbol;Acc:HGNC:14886]
ENSG00000154920	0.181538	-2.46166	1.45601e-53	3.2806e-52	yes	down	16.3967	3.05667	18.07	16.17	14.95	3.85	3.14	2.18	EME1	essential meiotic structure-specific endonuclease 1 [Source:HGNC Symbol;Acc:HGNC:24965]
ENSG00000186594	2.14466	1.10075	4.11188e-53	9.18379e-52	yes	up	21.5233	62.49	22.83	21.49	20.25	59.99	64.53	62.95	MIR22HG	MIR22 host gene [Source:HGNC Symbol;Acc:HGNC:28219]
ENSG00000175155	3.91596	1.96936	5.10694e-53	1.13814e-51	yes	up	1.73	6.91	1.77	1.65	1.77	7.4	6.21	7.12	YPEL2	yippee like 2 [Source:HGNC Symbol;Acc:HGNC:18326]
ENSG00000286033	2.5416	1.34574	8.39422e-53	1.86872e-51	yes	up	60.83	142.8	59.27	55.04	68.18	148.93	136.84	142.63	CR381670.2	novel transcript
ENSG00000197977	0.292139	-1.77527	1.16645e-52	2.59392e-51	yes	down	9.77667	2.90333	9.74	9.69	9.9	3.07	2.83	2.81	ELOVL2	ELOVL fatty acid elongase 2 [Source:HGNC Symbol;Acc:HGNC:14416]
ENSG00000213859	3.05801	1.61259	1.51278e-52	3.3568e-51	yes	up	5.33	16.4167	5.54	5.18	5.27	17.12	16.56	15.57	KCTD11	potassium channel tetramerization domain containing 11 [Source:HGNC Symbol;Acc:HGNC:21302]
ENSG00000000460	0.346073	-1.53085	3.05649e-52	6.76025e-51	yes	down	14.2567	5.5	15.46	13.09	14.22	5.87	4.88	5.75	C1orf112	chromosome 1 open reading frame 112 [Source:HGNC Symbol;Acc:HGNC:25565]
ENSG00000131470	0.259979	-1.94353	3.6708e-52	8.11022e-51	yes	down	39.5667	10.35	41.79	39.76	37.15	9.88	12.2	8.97	PSMC3IP	PSMC3 interacting protein [Source:HGNC Symbol;Acc:HGNC:17928]
ENSG00000262814	0.441665	-1.17898	5.66663e-52	1.2466e-50	yes	down	127.22	57.1233	131.54	121.28	128.84	52.32	61.71	57.34	MRPL12	mitochondrial ribosomal protein L12 [Source:HGNC Symbol;Acc:HGNC:10378]
ENSG00000038427	0.318896	-1.64884	7.10166e-52	1.55727e-50	yes	down	7.31667	2.21	6.11	9.06	6.78	2.75	2.2	1.68	VCAN	versican [Source:HGNC Symbol;Acc:HGNC:2464]
ENSG00000183048	0.188292	-2.40895	1.50958e-51	3.29965e-50	yes	down	15.5267	3.1	15.99	16.67	13.92	2.65	3.64	3.01	SLC25A10	solute carrier family 25 member 10 [Source:HGNC Symbol;Acc:HGNC:10980]
ENSG00000136158	2.10634	1.07474	1.5245e-51	3.32871e-50	yes	up	31	66.3267	27.36	31.74	33.9	67.16	66.08	65.74	SPRY2	sprouty RTK signaling antagonist 2 [Source:HGNC Symbol;Acc:HGNC:11270]
ENSG00000183684	0.411533	-1.28092	1.62629e-51	3.54717e-50	yes	down	127.76	54.04	146.15	121.48	115.65	56.97	50.54	54.61	ALYREF	Aly/REF export factor [Source:HGNC Symbol;Acc:HGNC:19071]
ENSG00000160299	0.497108	-1.00837	4.26379e-51	9.25071e-50	yes	down	19.5867	9.57	22.96	18.78	17.02	9.46	8.58	10.67	PCNT	pericentrin [Source:HGNC Symbol;Acc:HGNC:16068]
ENSG00000169136	2.41286	1.27074	4.54166e-51	9.83273e-50	yes	up	19.6133	47.88	22.22	19.7	16.92	47.31	51.38	44.95	ATF5	activating transcription factor 5 [Source:HGNC Symbol;Acc:HGNC:790]
ENSG00000161999	0.361669	-1.46726	6.53203e-51	1.40824e-49	yes	down	38.7	13.89	36.6	39.42	40.08	12.26	14.49	14.92	JMJD8	jumonji domain containing 8 [Source:HGNC Symbol;Acc:HGNC:14148]
ENSG00000138772	0.439311	-1.18669	1.72524e-50	3.70383e-49	yes	down	64.5467	27.8633	66.55	63.65	63.44	26.96	27.72	28.91	ANXA3	annexin A3 [Source:HGNC Symbol;Acc:HGNC:541]
ENSG00000236453	2.02032	1.01459	1.99112e-50	4.26126e-49	yes	up	29.1867	60.67	32.67	25.78	29.11	56.23	63.1	62.68	AC003092.1	novel transcript
ENSG00000137501	0.373011	-1.42271	2.20725e-50	4.71393e-49	yes	down	33.57	13.14	33.2	32.48	35.03	12.11	12.65	14.66	SYTL2	synaptotagmin like 2 [Source:HGNC Symbol;Acc:HGNC:15585]
ENSG00000123080	0.285433	-1.80878	2.53025e-50	5.38691e-49	yes	down	25.7233	10.3867	28.05	22.52	26.6	9.25	10.47	11.44	CDKN2C	cyclin dependent kinase inhibitor 2C [Source:HGNC Symbol;Acc:HGNC:1789]
ENSG00000214706	0.469261	-1.09154	3.01307e-50	6.40818e-49	yes	down	69.7967	32.98	77.23	66.54	65.62	34.02	32.25	32.67	IFRD2	interferon related developmental regulator 2 [Source:HGNC Symbol;Acc:HGNC:5457]
ENSG00000078804	2.84366	1.50775	4.54363e-50	9.63335e-49	yes	up	5.82333	17.2567	5.03	6.12	6.32	18.74	15.54	17.49	TP53INP2	tumor protein p53 inducible nuclear protein 2 [Source:HGNC Symbol;Acc:HGNC:16104]
ENSG00000139343	0.478551	-1.06325	5.1323e-50	1.08702e-48	yes	down	77.1933	37.32	77.09	77.29	77.2	36.83	38.93	36.2	SNRPF	small nuclear ribonucleoprotein polypeptide F [Source:HGNC Symbol;Acc:HGNC:11162]
ENSG00000132603	0.499225	-1.00224	5.4071e-50	1.14404e-48	yes	down	65.2533	33.76	67.47	63.38	64.91	34.48	30.99	35.81	NIP7	NIP7, nucleolar pre-rRNA processing protein [Source:HGNC Symbol;Acc:HGNC:24328]
ENSG00000014138	0.254487	-1.97433	8.46327e-50	1.78513e-48	yes	down	18.6133	4.81667	21.11	15.08	19.65	4.16	5.67	4.62	POLA2	DNA polymerase alpha 2, accessory subunit [Source:HGNC Symbol;Acc:HGNC:30073]
ENSG00000059769	2.22785	1.15565	9.34275e-50	1.96659e-48	yes	up	10.29	21.64	9.78	10.04	11.05	21.18	22.83	20.91	DNAJC25	DnaJ heat shock protein family (Hsp40) member C25 [Source:HGNC Symbol;Acc:HGNC:34187]
ENSG00000168016	2.70895	1.43773	1.17168e-49	2.46378e-48	yes	up	5.31	13.9233	5.14	7.71	3.08	14.91	15.07	11.79	TRANK1	tetratricopeptide repeat and ankyrin repeat containing 1 [Source:HGNC Symbol;Acc:HGNC:29011]
ENSG00000117139	2.00261	1.00188	1.64049e-49	3.44251e-48	yes	up	11.18	21.45	10.63	11.33	11.58	21.3	21.1	21.95	KDM5B	lysine demethylase 5B [Source:HGNC Symbol;Acc:HGNC:18039]
ENSG00000128590	2.81811	1.49473	2.64714e-49	5.50416e-48	yes	up	8.11	21.59	7.5	8.42	8.41	22.04	21.62	21.11	DNAJB9	DnaJ heat shock protein family (Hsp40) member B9 [Source:HGNC Symbol;Acc:HGNC:6968]
ENSG00000149554	0.436935	-1.19451	3.39374e-49	7.04227e-48	yes	down	40.8133	17.8033	43.03	42.01	37.4	17.94	16.25	19.22	CHEK1	checkpoint kinase 1 [Source:HGNC Symbol;Acc:HGNC:1925]
ENSG00000161692	0.345544	-1.53306	4.47955e-49	9.28599e-48	yes	down	18.73	7.01333	19.48	19.38	17.33	6.73	7.54	6.77	DBF4B	DBF4 zinc finger B [Source:HGNC Symbol;Acc:HGNC:17883]
ENSG00000127586	0.334867	-1.57834	5.95336e-49	1.23162e-47	yes	down	24.9933	9.02667	30.38	25.29	19.31	11.16	7.48	8.44	CHTF18	chromosome transmission fidelity factor 18 [Source:HGNC Symbol;Acc:HGNC:18435]
ENSG00000214826	0.327548	-1.61022	8.50371e-49	1.75746e-47	yes	down	8.41667	2.97	8.75	8.54	7.96	2.81	2.79	3.31	DDX12P	DEAD/H-box helicase 12, pseudogene [Source:HGNC Symbol;Acc:HGNC:2737]
ENSG00000156136	0.414285	-1.2713	8.56797e-49	1.76896e-47	yes	down	28.07	11.67	28.1	26.26	29.85	11.56	11.76	11.69	DCK	deoxycytidine kinase [Source:HGNC Symbol;Acc:HGNC:2704]
ENSG00000166483	0.325878	-1.6176	9.11273e-49	1.87953e-47	yes	down	22.0633	6.94	23.42	19.74	23.03	7.68	5.94	7.2	WEE1	WEE1 G2 checkpoint kinase [Source:HGNC Symbol;Acc:HGNC:12761]
ENSG00000234771	4.62623	2.20984	1.50827e-48	3.10149e-47	yes	up	1.17	5.20667	1.3	0.96	1.25	5.2	5.12	5.3	SLC25A25-AS1	SLC25A25 antisense RNA 1 [Source:HGNC Symbol;Acc:HGNC:27844]
ENSG00000137414	2.93855	1.5551	1.55125e-48	3.18349e-47	yes	up	3.63333	10.81	3.27	3.74	3.89	10.07	11.13	11.23	FAM8A1	family with sequence similarity 8 member A1 [Source:HGNC Symbol;Acc:HGNC:16372]
ENSG00000125657	3.4958	1.80562	2.07107e-48	4.22908e-47	yes	up	7.02667	24.9633	6.99	6.99	7.1	24.66	23.42	26.81	TNFSF9	TNF superfamily member 9 [Source:HGNC Symbol;Acc:HGNC:11939]
ENSG00000140263	0.417275	-1.26093	2.31335e-48	4.71909e-47	yes	down	24.6467	9.85333	26.1	23.93	23.91	10.08	10.81	8.67	SORD	sorbitol dehydrogenase [Source:HGNC Symbol;Acc:HGNC:11184]
ENSG00000215784	0.123016	-3.02308	2.42776e-48	4.94756e-47	yes	down	9.26667	1.17	10.22	8.64	8.94	1.62	0.96	0.93	FAM72D	family with sequence similarity 72 member D [Source:HGNC Symbol;Acc:HGNC:33593]
ENSG00000125730	6.45669	2.6908	2.70067e-48	5.49824e-47	yes	up	7.29667	45.3867	6.44	8.28	7.17	41.23	42.53	52.4	C3	complement C3 [Source:HGNC Symbol;Acc:HGNC:1318]
ENSG00000186638	0.20376	-2.29506	2.98933e-48	6.0799e-47	yes	down	4.25333	0.89	4.42	4.22	4.12	0.72	1	0.95	KIF24	kinesin family member 24 [Source:HGNC Symbol;Acc:HGNC:19916]
ENSG00000173846	2.22414	1.15325	5.28191e-48	1.06685e-46	yes	up	24.1033	47.9667	23.91	24.7	23.7	48.81	42.64	52.45	PLK3	polo like kinase 3 [Source:HGNC Symbol;Acc:HGNC:2154]
ENSG00000095383	0.494487	-1.01599	1.0964e-47	2.20801e-46	yes	down	49.8367	24.55	55.32	49.97	44.22	25.38	23.63	24.64	TBC1D2	TBC1 domain family member 2 [Source:HGNC Symbol;Acc:HGNC:18026]
ENSG00000149636	0.483567	-1.04821	1.86664e-47	3.73711e-46	yes	down	41.4167	19.5067	42.9	40.27	41.08	20.48	18.85	19.19	DSN1	DSN1 homolog, MIS12 kinetochore complex component [Source:HGNC Symbol;Acc:HGNC:16165]
ENSG00000158089	0.387425	-1.36801	2.98683e-47	5.96231e-46	yes	down	30.0633	11.4633	31.55	30.89	27.75	11.86	10.47	12.06	GALNT14	polypeptide N-acetylgalactosaminyltransferase 14 [Source:HGNC Symbol;Acc:HGNC:22946]
ENSG00000135365	2.33407	1.22285	5.31073e-47	1.05806e-45	yes	up	9.01	20.49	8.18	8.66	10.19	20.77	21.78	18.92	PHF21A	PHD finger protein 21A [Source:HGNC Symbol;Acc:HGNC:24156]
ENSG00000176974	0.423245	-1.24044	5.54079e-47	1.10283e-45	yes	down	32.2133	12.79	34.78	29.41	32.45	11.48	12.88	14.01	SHMT1	serine hydroxymethyltransferase 1 [Source:HGNC Symbol;Acc:HGNC:10850]
ENSG00000175105	2.29406	1.1979	5.76566e-47	1.14647e-45	yes	up	5.77667	13.9067	5.75	5.45	6.13	13.28	15.01	13.43	ZNF654	zinc finger protein 654 [Source:HGNC Symbol;Acc:HGNC:25612]
ENSG00000070540	2.03956	1.02826	7.44574e-47	1.47625e-45	yes	up	30.3567	63.9833	29.25	32.32	29.5	62.44	65.8	63.71	WIPI1	WD repeat domain, phosphoinositide interacting 1 [Source:HGNC Symbol;Acc:HGNC:25471]
ENSG00000165704	0.453014	-1.14237	1.03667e-46	2.0514e-45	yes	down	85.9033	40.3633	95.1	75.73	86.88	45.63	39.28	36.18	HPRT1	hypoxanthine phosphoribosyltransferase 1 [Source:HGNC Symbol;Acc:HGNC:5157]
ENSG00000239779	2.31214	1.20923	1.17153e-46	2.31604e-45	yes	up	32.64	67.66	31.52	35.66	30.74	69.27	65.78	67.93	WBP1	WW domain binding protein 1 [Source:HGNC Symbol;Acc:HGNC:12737]
ENSG00000160886	0.344009	-1.53948	1.49588e-46	2.95155e-45	yes	down	38.8233	12.15	40.75	33.94	41.78	12.32	12.26	11.87	LY6K	lymphocyte antigen 6 family member K [Source:HGNC Symbol;Acc:HGNC:24225]
ENSG00000181938	0.257385	-1.958	1.95132e-46	3.83174e-45	yes	down	15.82	4.06667	16.34	16.2	14.92	3.98	4.72	3.5	GINS3	GINS complex subunit 3 [Source:HGNC Symbol;Acc:HGNC:25851]
ENSG00000163235	2.0568	1.0404	2.39568e-46	4.6953e-45	yes	up	14.73	30.57	13.91	15.67	14.61	30.74	29.48	31.49	TGFA	transforming growth factor alpha [Source:HGNC Symbol;Acc:HGNC:11765]
ENSG00000174307	2.11682	1.0819	3.37797e-46	6.57644e-45	yes	up	29.7833	58.5967	30.67	27.36	31.32	58.43	57.51	59.85	PHLDA3	pleckstrin homology like domain family A member 3 [Source:HGNC Symbol;Acc:HGNC:8934]
ENSG00000131471	17.5804	4.1359	3.73472e-46	7.26408e-45	yes	up	0.206667	4.16667	0.19	0.23	0.2	3.88	4.39	4.23	AOC3	amine oxidase, copper containing 3 [Source:HGNC Symbol;Acc:HGNC:550]
ENSG00000112715	2.13219	1.09234	4.54484e-46	8.82302e-45	yes	up	33.0233	70.28	28.93	36.53	33.61	72.76	70.62	67.46	VEGFA	vascular endothelial growth factor A [Source:HGNC Symbol;Acc:HGNC:12680]
ENSG00000123358	3.7393	1.90277	8.54492e-46	1.65102e-44	yes	up	3.82333	15.1167	4.03	3.55	3.89	15.83	13.57	15.95	NR4A1	nuclear receptor subfamily 4 group A member 1 [Source:HGNC Symbol;Acc:HGNC:7980]
ENSG00000174851	2.00195	1.0014	1.24347e-45	2.39582e-44	yes	up	68.2867	156.597	71.71	64.1	69.05	162.45	156.08	151.26	YIF1A	Yip1 interacting factor homolog A, membrane trafficking protein [Source:HGNC Symbol;Acc:HGNC:16688]
ENSG00000073060	0.482175	-1.05237	1.91505e-45	3.67249e-44	yes	down	26.1433	12.3633	28.64	26.19	23.6	14.14	11.43	11.52	SCARB1	scavenger receptor class B member 1 [Source:HGNC Symbol;Acc:HGNC:1664]
ENSG00000129195	0.11578	-3.11054	2.5057e-45	4.79619e-44	yes	down	12.7	1.78	10.98	14.25	12.87	2.42	1.47	1.45	PIMREG	PICALM interacting mitotic regulator [Source:HGNC Symbol;Acc:HGNC:25483]
ENSG00000112759	0.475988	-1.071	2.74426e-45	5.23325e-44	yes	down	49.3333	22.5567	51.29	51.56	45.15	22.66	21.83	23.18	SLC29A1	solute carrier family 29 member 1 (Augustine blood group) [Source:HGNC Symbol;Acc:HGNC:11003]
ENSG00000115159	0.392999	-1.3474	2.87356e-45	5.47473e-44	yes	down	19.8467	12.19	16.15	26.35	17.04	6.15	7.64	22.78	GPD2	glycerol-3-phosphate dehydrogenase 2 [Source:HGNC Symbol;Acc:HGNC:4456]
ENSG00000079931	0.319538	-1.64594	3.8224e-45	7.25548e-44	yes	down	15.8033	5.46333	14.16	17.18	16.07	6.2	4.89	5.3	MOXD1	monooxygenase DBH like 1 [Source:HGNC Symbol;Acc:HGNC:21063]
ENSG00000126215	0.364508	-1.45598	5.34142e-45	1.012e-43	yes	down	30.21	8.09	31.02	30.15	29.46	9.05	7.1	8.12	XRCC3	X-ray repair cross complementing 3 [Source:HGNC Symbol;Acc:HGNC:12830]
ENSG00000105519	5.25845	2.39464	5.98645e-45	1.13003e-43	yes	up	1.73667	7.50333	1.38	1.35	2.48	8.86	6.18	7.47	CAPS	calcyphosine [Source:HGNC Symbol;Acc:HGNC:1487]
ENSG00000186567	4.17701	2.06247	6.50665e-45	1.2271e-43	yes	up	3.49333	16.55	4.34	3.11	3.03	15.3	16.77	17.58	CEACAM19	carcinoembryonic antigen related cell adhesion molecule 19 [Source:HGNC Symbol;Acc:HGNC:31951]
ENSG00000168495	2.10612	1.07459	7.02212e-45	1.32309e-43	yes	up	15.78	29.9833	16.93	15.77	14.64	29.46	28.73	31.76	POLR3D	RNA polymerase III subunit D [Source:HGNC Symbol;Acc:HGNC:1080]
ENSG00000092140	0.489819	-1.02968	7.26139e-45	1.36692e-43	yes	down	18.86	9.34667	18.07	20.65	17.86	9.69	9.31	9.04	G2E3	G2/M-phase specific E3 ubiquitin protein ligase [Source:HGNC Symbol;Acc:HGNC:20338]
ENSG00000158373	3.71981	1.89523	1.17995e-44	2.20901e-43	yes	up	15.6	57.1867	16.79	15.94	14.07	57.16	54.09	60.31	HIST1H2BD	histone cluster 1 H2B family member d [Source:HGNC Symbol;Acc:HGNC:4747]
ENSG00000258017	0.225325	-2.14992	1.48668e-44	2.77816e-43	yes	down	204.37	47.09	224.57	214.66	173.88	43.41	43.11	54.75	AC011603.2	novel transcript, antisense to TUBA1B
ENSG00000075188	0.476774	-1.06862	3.82439e-44	7.1142e-43	yes	down	109.233	47.81	111.06	104.85	111.79	41.96	51.24	50.23	NUP37	nucleoporin 37 [Source:HGNC Symbol;Acc:HGNC:29929]
ENSG00000213390	0.396938	-1.33302	4.50257e-44	8.36057e-43	yes	down	10.6867	4.31667	10.85	10.72	10.49	4.26	4.38	4.31	ARHGAP19	Rho GTPase activating protein 19 [Source:HGNC Symbol;Acc:HGNC:23724]
ENSG00000145293	0.472677	-1.08107	4.99403e-44	9.25636e-43	yes	down	44.7733	21.23	43.4	44.04	46.88	19.98	22.54	21.17	ENOPH1	enolase-phosphatase 1 [Source:HGNC Symbol;Acc:HGNC:24599]
ENSG00000156453	2.01846	1.01325	5.48333e-44	1.01358e-42	yes	up	18.3	35.6367	17.03	18.76	19.11	32.67	36.97	37.27	PCDH1	protocadherin 1 [Source:HGNC Symbol;Acc:HGNC:8655]
ENSG00000221926	2.32549	1.21753	7.1015e-44	1.30914e-42	yes	up	20.98	47.7333	23.86	19.22	19.86	50.99	45.77	46.44	TRIM16	tripartite motif containing 16 [Source:HGNC Symbol;Acc:HGNC:17241]
ENSG00000130204	0.495688	-1.0125	7.15542e-44	1.3179e-42	yes	down	70.4067	35.2	77.81	69.08	64.33	35.43	35.51	34.66	AC011481.1	translocase of outer mitochondrial membrane 40 [Source:NCBI gene;Acc:10452]
ENSG00000080546	2.60737	1.38259	7.83856e-44	1.44113e-42	yes	up	8.88667	24.5933	8.67	8.19	9.8	23.26	25.93	24.59	SESN1	sestrin 1 [Source:HGNC Symbol;Acc:HGNC:21595]
ENSG00000185347	0.293479	-1.76867	8.42882e-44	1.54826e-42	yes	down	27.6467	8.79333	28.12	27.27	27.55	8.82	10.39	7.17	TEDC1	tubulin epsilon and delta complex 1 [Source:HGNC Symbol;Acc:HGNC:20127]
ENSG00000168685	2.76111	1.46525	9.49751e-44	1.73832e-42	yes	up	4.67333	10.8133	4.87	4.13	5.02	10.56	11.11	10.77	IL7R	interleukin 7 receptor [Source:HGNC Symbol;Acc:HGNC:6024]
ENSG00000184470	0.350439	-1.51276	1.07868e-43	1.97079e-42	yes	down	42.8633	13.3467	48.32	41.34	38.93	13.44	12.4	14.2	TXNRD2	thioredoxin reductase 2 [Source:HGNC Symbol;Acc:HGNC:18155]
ENSG00000130522	2.28166	1.19008	1.13087e-43	2.06428e-42	yes	up	24.6033	51.9867	21.43	25.82	26.56	43.71	61.09	51.16	JUND	JunD proto-oncogene, AP-1 transcription factor subunit [Source:HGNC Symbol;Acc:HGNC:6206]
ENSG00000051825	0.466298	-1.10068	1.7422e-43	3.16892e-42	yes	down	35.5067	15.2733	35.89	33.11	37.52	15.31	18.92	11.59	MPHOSPH9	M-phase phosphoprotein 9 [Source:HGNC Symbol;Acc:HGNC:7215]
ENSG00000096060	0.361835	-1.4666	2.20963e-43	4.012e-42	yes	down	14.24	5.2	15.63	13.25	13.84	5.39	4.57	5.64	FKBP5	FKBP prolyl isomerase 5 [Source:HGNC Symbol;Acc:HGNC:3721]
ENSG00000154146	0.149983	-2.73713	3.94257e-43	7.1269e-42	yes	down	20.9733	3.21667	18.6	20.78	23.54	3.3	3.83	2.52	NRGN	neurogranin [Source:HGNC Symbol;Acc:HGNC:8000]
ENSG00000108798	0.242611	-2.04328	4.15363e-43	7.49519e-42	yes	down	16.99	4.12667	16.57	17.28	17.12	4.32	4.48	3.58	ABI3	ABI family member 3 [Source:HGNC Symbol;Acc:HGNC:29859]
ENSG00000180573	2.3336	1.22256	4.91176e-43	8.84765e-42	yes	up	17.5733	41.8267	18.35	17	17.37	40.14	41.81	43.53	HIST1H2AC	histone cluster 1 H2A family member c [Source:HGNC Symbol;Acc:HGNC:4733]
ENSG00000196562	2.48723	1.31454	5.68233e-43	1.02177e-41	yes	up	5.78	15.8433	5.59	5.85	5.9	15.41	15.15	16.97	SULF2	sulfatase 2 [Source:HGNC Symbol;Acc:HGNC:20392]
ENSG00000205208	0.355356	-1.49266	7.3174e-43	1.30889e-41	yes	down	14.64	5.37	14.26	14.11	15.55	5.04	5.68	5.39	C4orf46	chromosome 4 open reading frame 46 [Source:HGNC Symbol;Acc:HGNC:27320]
ENSG00000251562	2.94385	1.5577	7.78448e-43	1.39122e-41	yes	up	140.97	397.487	142.8	127.98	152.13	401.66	369.58	421.22	MALAT1	metastasis associated lung adenocarcinoma transcript 1 [Source:HGNC Symbol;Acc:HGNC:29665]
ENSG00000125347	2.14124	1.09844	8.2841e-43	1.47793e-41	yes	up	23.9033	47.7767	23.52	24.31	23.88	48.58	49.3	45.45	IRF1	interferon regulatory factor 1 [Source:HGNC Symbol;Acc:HGNC:6116]
ENSG00000006634	0.329185	-1.60303	1.36745e-42	2.43114e-41	yes	down	18.9467	6.01333	20.93	16.08	19.83	5.92	5.97	6.15	DBF4	DBF4 zinc finger [Source:HGNC Symbol;Acc:HGNC:17364]
ENSG00000198860	0.480554	-1.05723	2.14812e-42	3.80256e-41	yes	down	42.1133	20.7733	42.54	41.82	41.98	20.94	21.16	20.22	TSEN15	tRNA splicing endonuclease subunit 15 [Source:HGNC Symbol;Acc:HGNC:16791]
ENSG00000278704	2.74007	1.45421	2.22373e-42	3.93301e-41	yes	up	5.33667	18.3367	6.19	4.56	5.26	19.4	18.82	16.79	BX004987.1
ENSG00000076242	0.499661	-1.00098	2.24597e-42	3.96891e-41	yes	down	39.44	24.66	38	38.68	41.64	22.95	27.73	23.3	MLH1	mutL homolog 1 [Source:HGNC Symbol;Acc:HGNC:7127]
ENSG00000120699	0.49813	-1.00541	2.93879e-42	5.18427e-41	yes	down	88.9567	44.3233	98.7	82.32	85.85	45.02	43.04	44.91	EXOSC8	exosome component 8 [Source:HGNC Symbol;Acc:HGNC:17035]
ENSG00000152495	0.3333	-1.58511	3.7005e-42	6.50557e-41	yes	down	11.9933	2.85667	13.27	11.14	11.57	2.69	2.67	3.21	CAMK4	calcium/calmodulin dependent protein kinase IV [Source:HGNC Symbol;Acc:HGNC:1464]
ENSG00000284946	0.186789	-2.42052	4.39503e-42	7.71333e-41	yes	down	4.13667	1.06	4	3.91	4.5	1.6	0.86	0.72	AC068831.7	novel transcript
ENSG00000082497	0.122969	-3.02364	5.99055e-42	1.04865e-40	yes	down	3.92333	0.5	4.87	3.11	3.79	0.38	0.4	0.72	SERTAD4	SERTA domain containing 4 [Source:HGNC Symbol;Acc:HGNC:25236]
ENSG00000126458	2.08825	1.0623	6.56802e-42	1.14876e-40	yes	up	58.34	123.047	52.15	59.01	63.86	120.85	124.95	123.34	RRAS	RAS related [Source:HGNC Symbol;Acc:HGNC:10447]
ENSG00000149256	0.477924	-1.06515	7.65694e-42	1.33579e-40	yes	down	16.6667	6.45	9.02	31.45	9.53	4.61	6.47	8.27	TENM4	teneurin transmembrane protein 4 [Source:HGNC Symbol;Acc:HGNC:29945]
ENSG00000136261	0.48615	-1.04053	1.66305e-41	2.89142e-40	yes	down	49.77	24.2067	49.09	51.17	49.05	24.6	24.95	23.07	BZW2	basic leucine zipper and W2 domains 2 [Source:HGNC Symbol;Acc:HGNC:18808]
ENSG00000011638	3.76181	1.91143	1.73277e-41	3.00753e-40	yes	up	8.09667	29.0567	7.15	8.41	8.73	30.67	26.46	30.04	TMEM159	transmembrane protein 159 [Source:HGNC Symbol;Acc:HGNC:30136]
ENSG00000143303	2.60441	1.38096	2.80059e-41	4.83632e-40	yes	up	12.7233	32.5767	12.36	11.43	14.38	33.22	32.72	31.79	RRNAD1	ribosomal RNA adenine dimethylase domain containing 1 [Source:HGNC Symbol;Acc:HGNC:24273]
ENSG00000162073	0.386739	-1.37057	4.14789e-41	7.15695e-40	yes	down	19.8567	7.68667	21.08	19.15	19.34	7.71	7.54	7.81	PAQR4	progestin and adipoQ receptor family member 4 [Source:HGNC Symbol;Acc:HGNC:26386]
ENSG00000002079	4.97146	2.31367	9.93499e-41	1.70133e-39	yes	up	1.65333	6.69667	1.69	1.69	1.58	6.87	6.26	6.96	MYH16	myosin heavy chain 16 pseudogene [Source:HGNC Symbol;Acc:HGNC:31038]
ENSG00000179431	0.423917	-1.23815	1.01391e-40	1.73339e-39	yes	down	25.6	10.9367	27.25	25.1	24.45	10.65	10.96	11.2	FJX1	four-jointed box kinase 1 [Source:HGNC Symbol;Acc:HGNC:17166]
ENSG00000188681	3.39678	1.76417	1.09205e-40	1.86541e-39	yes	up	33.9933	122.5	38.96	32.79	30.23	128.72	117.4	121.38	TEKT4P2	tektin 4 pseudogene 2 [Source:HGNC Symbol;Acc:HGNC:40046]
ENSG00000177646	0.488551	-1.03342	1.39081e-40	2.37377e-39	yes	down	38.83	19.1133	38.9	38.93	38.66	17.81	21.18	18.35	ACAD9	acyl-CoA dehydrogenase family member 9 [Source:HGNC Symbol;Acc:HGNC:21497]
ENSG00000143631	20.7661	4.37616	1.62328e-40	2.76593e-39	yes	up	0.0466667	0.983333	0.05	0.03	0.06	1.15	0.93	0.87	FLG	filaggrin [Source:HGNC Symbol;Acc:HGNC:3748]
ENSG00000111196	0.436256	-1.19675	1.7142e-40	2.91599e-39	yes	down	58.7833	25.2367	64.28	50.42	61.65	24.43	26.08	25.2	MAGOHB	mago homolog B, exon junction complex subunit [Source:HGNC Symbol;Acc:HGNC:25504]
ENSG00000160161	4.15634	2.05531	1.78878e-40	3.04034e-39	yes	up	0.583333	2.43333	0.63	0.64	0.48	2.22	2.69	2.39	CILP2	cartilage intermediate layer protein 2 [Source:HGNC Symbol;Acc:HGNC:24213]
ENSG00000196550	0.203632	-2.29596	2.47744e-40	4.18651e-39	yes	down	12.5867	3.35333	11.57	12.94	13.25	4.04	3.43	2.59	FAM72A	family with sequence similarity 72 member A [Source:HGNC Symbol;Acc:HGNC:24044]
ENSG00000159128	2.09217	1.065	2.72074e-40	4.59385e-39	yes	up	22.2267	44.7367	22.76	21.78	22.14	44.96	46.19	43.06	IFNGR2	interferon gamma receptor 2 [Source:HGNC Symbol;Acc:HGNC:5440]
ENSG00000122863	0.490814	-1.02675	3.04202e-40	5.12787e-39	yes	down	12.7667	6.38	13.57	13.02	11.71	6.58	6.19	6.37	CHST3	carbohydrate sulfotransferase 3 [Source:HGNC Symbol;Acc:HGNC:1971]
ENSG00000186854	0.408758	-1.29068	4.07426e-40	6.85661e-39	yes	down	15.21	7.92667	17.3	14.42	13.91	7.55	7.2	9.03	TRABD2A	TraB domain containing 2A [Source:HGNC Symbol;Acc:HGNC:27013]
ENSG00000130707	4.8667	2.28294	4.47483e-40	7.51222e-39	yes	up	4.36	22.37	3.17	5.36	4.55	19.46	22.45	25.2	ASS1	argininosuccinate synthase 1 [Source:HGNC Symbol;Acc:HGNC:758]
ENSG00000119899	2.29745	1.20003	6.71921e-40	1.1234e-38	yes	up	9.35	21.1733	8.34	9.61	10.1	20.45	21.85	21.22	SLC17A5	solute carrier family 17 member 5 [Source:HGNC Symbol;Acc:HGNC:10933]
ENSG00000006459	2.63441	1.39748	6.845e-40	1.14349e-38	yes	up	1.92333	5.31667	1.73	2.13	1.91	5.15	5.17	5.63	KDM7A	lysine demethylase 7A [Source:HGNC Symbol;Acc:HGNC:22224]
ENSG00000257167	0.179835	-2.47526	6.85897e-40	1.14489e-38	yes	down	9.36333	2.26	8.93	10.08	9.08	2.61	1.87	2.3	TMPO-AS1	TMPO antisense RNA 1 [Source:HGNC Symbol;Acc:HGNC:44158]
ENSG00000100626	0.185596	-2.42977	1.24785e-39	2.07952e-38	yes	down	4.24667	0.826667	4.28	4.34	4.12	0.73	0.86	0.89	GALNT16	polypeptide N-acetylgalactosaminyltransferase 16 [Source:HGNC Symbol;Acc:HGNC:23233]
ENSG00000188315	17.5436	4.13287	1.58198e-39	2.63205e-38	yes	up	0.56	4.49333	0.12	0.37	1.19	3.37	5.66	4.45	C3orf62	chromosome 3 open reading frame 62 [Source:HGNC Symbol;Acc:HGNC:24771]
ENSG00000136122	0.401281	-1.31731	1.71933e-39	2.85593e-38	yes	down	22.7	10.14	23.63	21.46	23.01	11.25	9.67	9.5	BORA	bora, aurora kinase A activator [Source:HGNC Symbol;Acc:HGNC:24724]
ENSG00000146143	0.434818	-1.20152	1.91659e-39	3.18101e-38	yes	down	28.7567	11.93	26.75	30.42	29.1	12.13	11.97	11.69	PRIM2	DNA primase subunit 2 [Source:HGNC Symbol;Acc:HGNC:9370]
ENSG00000021355	2.03417	1.02444	1.99532e-39	3.30632e-38	yes	up	16.74	37.01	16.61	15.37	18.24	38.91	38.01	34.11	SERPINB1	serpin family B member 1 [Source:HGNC Symbol;Acc:HGNC:3311]
ENSG00000177830	0.465912	-1.10187	2.23513e-39	3.69772e-38	yes	down	43.4667	22.6833	43.67	44.38	42.35	25.31	21.45	21.29	CHID1	chitinase domain containing 1 [Source:HGNC Symbol;Acc:HGNC:28474]
ENSG00000070950	0.456093	-1.1326	2.36009e-39	3.9013e-38	yes	down	18.96	6.95	19.96	18.06	18.86	7.25	7.06	6.54	RAD18	RAD18, E3 ubiquitin protein ligase [Source:HGNC Symbol;Acc:HGNC:18278]
ENSG00000140848	0.381703	-1.38948	3.21227e-39	5.29714e-38	yes	down	25.7067	9.13333	24.69	26.1	26.33	10.03	8.91	8.46	CPNE2	copine 2 [Source:HGNC Symbol;Acc:HGNC:2315]
ENSG00000272405	2.0393	1.02808	4.10079e-39	6.72983e-38	yes	up	15.9	32.9667	14.81	17.21	15.68	35.9	31.01	31.99	AL365181.3	novel transcript, antisense to BCAN
ENSG00000118655	0.421797	-1.24538	4.29645e-39	7.03965e-38	yes	down	16.08	6.5	15.31	15.53	17.4	5.8	6.49	7.21	DCLRE1B	DNA cross-link repair 1B [Source:HGNC Symbol;Acc:HGNC:17641]
ENSG00000120334	0.399943	-1.32213	7.64155e-39	1.24508e-37	yes	down	17.9733	6.76667	18.84	16.82	18.26	8.02	6.31	5.97	CENPL	centromere protein L [Source:HGNC Symbol;Acc:HGNC:17879]
ENSG00000214357	0.0938343	-3.41374	7.7299e-39	1.25847e-37	yes	down	2.64	0.236667	2.28	2.84	2.8	0.27	0.27	0.17	NEURL1B	neuralized E3 ubiquitin protein ligase 1B [Source:HGNC Symbol;Acc:HGNC:35422]
ENSG00000183763	0.212793	-2.23248	1.13187e-38	1.83401e-37	yes	down	14.8767	4.75667	14.35	15.86	14.42	2.92	8.82	2.53	TRAIP	TRAF interacting protein [Source:HGNC Symbol;Acc:HGNC:30764]
ENSG00000117877	0.340023	-1.5563	1.58117e-38	2.55798e-37	yes	down	18.5467	5.69667	21.07	16.69	17.88	6.78	5.27	5.04	CD3EAP	CD3e molecule associated protein [Source:HGNC Symbol;Acc:HGNC:24219]
ENSG00000258667	0.493597	-1.0186	1.84539e-38	2.98071e-37	yes	down	13.06	7.34333	14.23	12.76	12.19	7.22	7.46	7.35	HIF1A-AS2	HIF1A antisense RNA 2 [Source:HGNC Symbol;Acc:HGNC:43015]
ENSG00000143195	0.403813	-1.30824	1.93382e-38	3.12109e-37	yes	down	7.58	3.33667	9.28	6.96	6.5	4.54	2.59	2.88	ILDR2	immunoglobulin like domain containing receptor 2 [Source:HGNC Symbol;Acc:HGNC:18131]
ENSG00000135241	2.18676	1.12879	3.08924e-38	4.9663e-37	yes	up	8.44667	19.1	8.03	8.56	8.75	20.51	18.44	18.35	PNPLA8	patatin like phospholipase domain containing 8 [Source:HGNC Symbol;Acc:HGNC:28900]
ENSG00000047346	2.37567	1.24834	3.75506e-38	6.02251e-37	yes	up	7.84	15.95	7.1	7.79	8.63	15.66	16.15	16.04	FAM214A	family with sequence similarity 214 member A [Source:HGNC Symbol;Acc:HGNC:25609]
ENSG00000198910	0.293325	-1.76943	5.13002e-38	8.20202e-37	yes	down	7.19	2.28333	6.35	8.15	7.07	2.23	2.94	1.68	L1CAM	L1 cell adhesion molecule [Source:HGNC Symbol;Acc:HGNC:6470]
ENSG00000120875	2.23388	1.15955	6.00419e-38	9.57724e-37	yes	up	4.63333	10.45	4.8	4.48	4.62	10.35	10.89	10.11	DUSP4	dual specificity phosphatase 4 [Source:HGNC Symbol;Acc:HGNC:3070]
ENSG00000170949	2.02036	1.01462	9.18256e-38	1.45789e-36	yes	up	10.8667	24.07	11.56	11.35	9.69	25.86	23.07	23.28	ZNF160	zinc finger protein 160 [Source:HGNC Symbol;Acc:HGNC:12948]
ENSG00000137494	2.38039	1.2512	1.98157e-37	3.12189e-36	yes	up	8.01	17.51	7.02	9.47	7.54	17.67	17.49	17.37	ANKRD42	ankyrin repeat domain 42 [Source:HGNC Symbol;Acc:HGNC:26752]
ENSG00000119820	2.04494	1.03206	2.02388e-37	3.18609e-36	yes	up	28.8333	50.3567	25.14	28.14	33.22	49.96	49.72	51.39	YIPF4	Yip1 domain family member 4 [Source:HGNC Symbol;Acc:HGNC:28145]
ENSG00000137404	0.207229	-2.2707	3.17843e-37	4.98832e-36	yes	down	16.4333	3.61	16.6	17.26	15.44	3.81	3.13	3.89	NRM	nurim [Source:HGNC Symbol;Acc:HGNC:8003]
ENSG00000104369	0.355744	-1.49109	5.89165e-37	9.19717e-36	yes	down	8.83667	3.21	8.52	9.57	8.42	3	2.71	3.92	JPH1	junctophilin 1 [Source:HGNC Symbol;Acc:HGNC:14201]
ENSG00000270276	3.81433	1.93143	6.5455e-37	1.02101e-35	yes	up	6.24667	23.4333	5.88	5.58	7.28	25.03	18.4	26.87	HIST2H4B	histone cluster 2 H4 family member b [Source:HGNC Symbol;Acc:HGNC:29607]
ENSG00000188312	0.304547	-1.71526	6.69844e-37	1.04407e-35	yes	down	5.18667	2	4.73	4.24	6.59	1.6	2.65	1.75	CENPP	centromere protein P [Source:HGNC Symbol;Acc:HGNC:32933]
ENSG00000285077	0.341875	-1.54846	7.06175e-37	1.09986e-35	yes	down	7.31	2.15333	6.98	7.72	7.23	2	2.16	2.3	AC091057.6	Rho GTPase-activating protein 11B [Source:UniProtKB/Swiss-Prot;Acc:Q3KRB8]
ENSG00000100350	0.345184	-1.53456	8.14357e-37	1.26739e-35	yes	down	8.97667	3.87	10.45	8.29	8.19	5.7	2.71	3.2	FOXRED2	FAD dependent oxidoreductase domain containing 2 [Source:HGNC Symbol;Acc:HGNC:26264]
ENSG00000214021	2.71852	1.44282	8.7433e-37	1.35866e-35	yes	up	5.27667	12.7933	4.61	5.29	5.93	12.82	13.32	12.24	TTLL3	tubulin tyrosine ligase like 3 [Source:HGNC Symbol;Acc:HGNC:24483]
ENSG00000163071	2.60817	1.38304	1.04915e-36	1.62416e-35	yes	up	4.57667	12.44	4.6	4.64	4.49	11.62	12.25	13.45	SPATA18	spermatogenesis associated 18 [Source:HGNC Symbol;Acc:HGNC:29579]
ENSG00000244694	2.16383	1.11359	1.0528e-36	1.62858e-35	yes	up	4.24	10.0933	3.91	4.16	4.65	10.62	9.75	9.91	PTCHD4	patched domain containing 4 [Source:HGNC Symbol;Acc:HGNC:21345]
ENSG00000101439	2.16449	1.11403	1.08273e-36	1.67235e-35	yes	up	68.1967	145.913	63.76	61.67	79.16	142.45	143.48	151.81	CST3	cystatin C [Source:HGNC Symbol;Acc:HGNC:2475]
ENSG00000157741	2.31586	1.21155	1.22233e-36	1.88656e-35	yes	up	1.91667	4.77667	1.57	1.63	2.55	6.41	3.55	4.37	UBN2	ubinuclein 2 [Source:HGNC Symbol;Acc:HGNC:21931]
ENSG00000171004	0.426828	-1.22827	1.24025e-36	1.91133e-35	yes	down	15.08	5.64333	16.06	14.97	14.21	5.57	5.81	5.55	HS6ST2	heparan sulfate 6-O-sulfotransferase 2 [Source:HGNC Symbol;Acc:HGNC:19133]
ENSG00000142185	0.374424	-1.41726	1.47958e-36	2.27502e-35	yes	down	16.0267	6.60333	17.19	16.08	14.81	6.94	6.96	5.91	TRPM2	transient receptor potential cation channel subfamily M member 2 [Source:HGNC Symbol;Acc:HGNC:12339]
ENSG00000148848	0.464437	-1.10645	1.79948e-36	2.75656e-35	yes	down	8.46333	3.84667	9.09	8.36	7.94	4.27	3.69	3.58	ADAM12	ADAM metallopeptidase domain 12 [Source:HGNC Symbol;Acc:HGNC:190]
ENSG00000249751	0.490406	-1.02795	2.32616e-36	3.55273e-35	yes	down	89.3267	44.5567	88.89	91.46	87.63	40.85	46.7	46.12	ECSCR	endothelial cell surface expressed chemotaxis and apoptosis regulator [Source:HGNC Symbol;Acc:HGNC:35454]
ENSG00000177000	2.73824	1.45325	2.36482e-36	3.60908e-35	yes	up	3.3	6.95333	2.62	4.46	2.82	6.13	7.7	7.03	MTHFR	methylenetetrahydrofolate reductase [Source:HGNC Symbol;Acc:HGNC:7436]
ENSG00000111801	3.54469	1.82566	3.46585e-36	5.26197e-35	yes	up	3.68333	11.7367	4.14	4.17	2.74	11.14	12.07	12	BTN3A3	butyrophilin subfamily 3 member A3 [Source:HGNC Symbol;Acc:HGNC:1140]
ENSG00000177888	2.09159	1.0646	3.72079e-36	5.64068e-35	yes	up	4.79	10.0367	4.57	4.4	5.4	10.55	9.75	9.81	ZBTB41	zinc finger and BTB domain containing 41 [Source:HGNC Symbol;Acc:HGNC:24819]
ENSG00000145246	2.03028	1.02168	3.8887e-36	5.89086e-35	yes	up	6.60667	12.52	6.63	7.02	6.17	12.31	12.56	12.69	ATP10D	ATPase phospholipid transporting 10D (putative) [Source:HGNC Symbol;Acc:HGNC:13549]
ENSG00000134955	2.41781	1.2737	4.50121e-36	6.79361e-35	yes	up	7.79	19.2567	7.47	8.62	7.28	19.82	18.31	19.64	SLC37A2	solute carrier family 37 member 2 [Source:HGNC Symbol;Acc:HGNC:20644]
ENSG00000188985	0.208216	-2.26385	4.68032e-36	7.05874e-35	yes	down	59.6767	12.7133	59.46	60.85	58.72	13.1	13.06	11.98	DHFRP1	dihydrofolate reductase pseudogene 1 [Source:HGNC Symbol;Acc:HGNC:2862]
ENSG00000126522	0.416988	-1.26192	4.71384e-36	7.10406e-35	yes	down	32.1367	14.0367	33.42	32.51	30.48	15.4	12.11	14.6	ASL	argininosuccinate lyase [Source:HGNC Symbol;Acc:HGNC:746]
ENSG00000129646	5.23896	2.38928	4.754e-36	7.15932e-35	yes	up	1.71333	8.33667	1.15	2.01	1.98	9.64	7.89	7.48	QRICH2	glutamine rich 2 [Source:HGNC Symbol;Acc:HGNC:25326]
ENSG00000007047	2.11907	1.08343	4.84468e-36	7.29051e-35	yes	up	9.22	19.5333	8.66	9.9	9.1	20.25	19.77	18.58	MARK4	microtubule affinity regulating kinase 4 [Source:HGNC Symbol;Acc:HGNC:13538]
ENSG00000169689	0.415943	-1.26554	5.04872e-36	7.58086e-35	yes	down	91.43	39.5133	86.4	92.7	95.19	38.31	40.53	39.7	CENPX	centromere protein X [Source:HGNC Symbol;Acc:HGNC:11422]
ENSG00000161981	0.245185	-2.02806	6.70438e-36	1.00448e-34	yes	down	28.6167	7.04667	32.31	27.17	26.37	6.01	8.12	7.01	SNRNP25	small nuclear ribonucleoprotein U11/U12 subunit 25 [Source:HGNC Symbol;Acc:HGNC:14161]
ENSG00000107731	4.06966	2.02491	7.16179e-36	1.07066e-34	yes	up	0.77	3.17333	0.83	0.74	0.74	3.37	3.1	3.05	UNC5B	unc-5 netrin receptor B [Source:HGNC Symbol;Acc:HGNC:12568]
ENSG00000131351	0.266095	-1.90999	7.31417e-36	1.09185e-34	yes	down	19.5133	5.53	19.86	19.32	19.36	5.6	5.26	5.73	HAUS8	HAUS augmin like complex subunit 8 [Source:HGNC Symbol;Acc:HGNC:30532]
ENSG00000157306	4.37432	2.12906	8.77212e-36	1.30758e-34	yes	up	1.24667	5.55667	1.37	0.88	1.49	5.67	4.61	6.39	ZFHX2-AS1	ZFHX2 antisense RNA 1 [Source:HGNC Symbol;Acc:HGNC:52658]
ENSG00000139292	0.115974	-3.10812	1.15474e-35	1.71752e-34	yes	down	4.05	0.483333	3.18	4.47	4.5	0.46	0.3	0.69	LGR5	leucine rich repeat containing G protein-coupled receptor 5 [Source:HGNC Symbol;Acc:HGNC:4504]
ENSG00000249328	6.1087	2.61087	2.8044e-35	4.13215e-34	yes	up	1.04333	6.8	1.18	0.92	1.03	5.37	7.93	7.1	AC036214.1	novel transcript
ENSG00000167775	0.310273	-1.68839	2.93084e-35	4.31535e-34	yes	down	31.0567	10.4367	32.93	33.21	27.03	11.88	9.4	10.03	CD320	CD320 molecule [Source:HGNC Symbol;Acc:HGNC:16692]
ENSG00000127589	0.305643	-1.71008	3.66887e-35	5.39427e-34	yes	down	19.7533	6.13333	20.44	19.01	19.81	6.04	6.91	5.45	TUBBP1	tubulin beta pseudogene 1 [Source:HGNC Symbol;Acc:HGNC:12414]
ENSG00000171425	2.53263	1.34064	4.6794e-35	6.86524e-34	yes	up	18.8967	48.42	17.86	21.91	16.92	52.11	46.39	46.76	ZNF581	zinc finger protein 581 [Source:HGNC Symbol;Acc:HGNC:25017]
ENSG00000163644	2.6162	1.38747	4.96628e-35	7.2757e-34	yes	up	3.80333	9.54	3.32	4.43	3.66	10.24	8.84	9.54	PPM1K	protein phosphatase, Mg2+/Mn2+ dependent 1K [Source:HGNC Symbol;Acc:HGNC:25415]
ENSG00000225138	2.94096	1.55629	4.9932e-35	7.30992e-34	yes	up	6.96667	21.4367	8.33	6.56	6.01	19.39	20.75	24.17	SLC9A3-AS1	SLC9A3 antisense RNA 1 [Source:HGNC Symbol;Acc:HGNC:40550]
ENSG00000171960	0.468152	-1.09495	5.60858e-35	8.20495e-34	yes	down	113.62	53.8467	114.15	117.89	108.82	52.42	52.01	57.11	PPIH	peptidylprolyl isomerase H [Source:HGNC Symbol;Acc:HGNC:14651]
ENSG00000156787	0.48076	-1.05661	7.3763e-35	1.07679e-33	yes	down	24.9733	16.32	28.69	23.1	23.13	16.57	15.99	16.4	TBC1D31	TBC1 domain family member 31 [Source:HGNC Symbol;Acc:HGNC:30888]
ENSG00000197594	0.438645	-1.18888	8.02217e-35	1.16858e-33	yes	down	6.87	3.22333	6.72	7.1	6.79	2.84	3.72	3.11	ENPP1	ectonucleotide pyrophosphatase/phosphodiesterase 1 [Source:HGNC Symbol;Acc:HGNC:3356]
ENSG00000026950	2.38462	1.25376	9.48271e-35	1.37839e-33	yes	up	6.70333	16.6033	6.53	7.08	6.5	17.38	16.36	16.07	BTN3A1	butyrophilin subfamily 3 member A1 [Source:HGNC Symbol;Acc:HGNC:1138]
ENSG00000196497	0.482077	-1.05266	1.03668e-34	1.50583e-33	yes	down	32.17	20.7033	30.17	35.62	30.72	24.41	16.29	21.41	IPO4	importin 4 [Source:HGNC Symbol;Acc:HGNC:19426]
ENSG00000119333	0.442053	-1.17771	1.14685e-34	1.66232e-33	yes	down	44.48	20.5133	43.37	45.8	44.27	19.74	18.3	23.5	WDR34	WD repeat domain 34 [Source:HGNC Symbol;Acc:HGNC:28296]
ENSG00000171791	0.282218	-1.82512	1.65121e-34	2.37489e-33	yes	down	3.47333	1.01667	3.33	3.38	3.71	1.06	1.03	0.96	BCL2	BCL2, apoptosis regulator [Source:HGNC Symbol;Acc:HGNC:990]
ENSG00000064763	0.427447	-1.22618	1.8402e-34	2.64486e-33	yes	down	19.39	8.57333	18.56	18.84	20.77	8.64	9.6	7.48	FAR2	fatty acyl-CoA reductase 2 [Source:HGNC Symbol;Acc:HGNC:25531]
ENSG00000178809	10.144	3.34256	3.20739e-34	4.57774e-33	yes	up	0.52	5.72667	0.63	0.29	0.64	5.12	4.64	7.42	TRIM73	tripartite motif containing 73 [Source:HGNC Symbol;Acc:HGNC:18162]
ENSG00000178966	0.415292	-1.2678	3.399e-34	4.84446e-33	yes	down	20.1333	8.29667	20.49	18.93	20.98	8.01	9.16	7.72	RMI1	RecQ mediated genome instability 1 [Source:HGNC Symbol;Acc:HGNC:25764]
ENSG00000260549	0.347271	-1.52586	4.15438e-34	5.90874e-33	yes	down	227.657	80.6067	207.38	224.77	250.82	75	78.73	88.09	MT1L	metallothionein 1L, pseudogene [Source:HGNC Symbol;Acc:HGNC:7404]
ENSG00000114423	2.31371	1.21021	4.40983e-34	6.26771e-33	yes	up	4.89333	12.5333	4.18	5.66	4.84	13.1	12.3	12.2	CBLB	Cbl proto-oncogene B [Source:HGNC Symbol;Acc:HGNC:1542]
ENSG00000278259	0.441118	-1.18076	4.73571e-34	6.72621e-33	yes	down	25.7667	13.0967	26.35	26.94	24.01	12.53	12.87	13.89	MYO19	myosin XIX [Source:HGNC Symbol;Acc:HGNC:26234]
ENSG00000140961	2.66726	1.41536	5.42614e-34	7.69618e-33	yes	up	11.1733	30.0567	13.22	11.38	8.92	29.38	28.97	31.82	OSGIN1	oxidative stress induced growth inhibitor 1 [Source:HGNC Symbol;Acc:HGNC:30093]
ENSG00000167695	0.392931	-1.34765	5.59347e-34	7.92802e-33	yes	down	19.4	9.55	19.87	17.83	20.5	8.32	8.2	12.13	FAM57A	family with sequence similarity 57 member A [Source:HGNC Symbol;Acc:HGNC:29646]
ENSG00000160352	0.384656	-1.37836	6.3637e-34	9.00725e-33	yes	down	11.0367	3.75333	11.35	9.71	12.05	4.47	3.28	3.51	ZNF714	zinc finger protein 714 [Source:HGNC Symbol;Acc:HGNC:27124]
ENSG00000109452	0.448986	-1.15526	6.6234e-34	9.36836e-33	yes	down	12.12	5.44667	13.11	11.53	11.72	4.35	6.02	5.97	INPP4B	inositol polyphosphate-4-phosphatase type II B [Source:HGNC Symbol;Acc:HGNC:6075]
ENSG00000220323	2.69993	1.43292	9.17509e-34	1.29418e-32	yes	up	4.55	11.53	4.81	5.24	3.6	10.57	12.27	11.75	HIST2H2BD	histone cluster 2 H2B family member d (pseudogene) [Source:HGNC Symbol;Acc:HGNC:20517]
ENSG00000146410	0.255137	-1.97066	9.80742e-34	1.38242e-32	yes	down	14.3833	4.52333	14.19	14.61	14.35	3.78	4.76	5.03	MTFR2	mitochondrial fission regulator 2 [Source:HGNC Symbol;Acc:HGNC:21115]
ENSG00000253910	2.38571	1.25442	1.2744e-33	1.79265e-32	yes	up	5.04333	12.12	4.55	5.7	4.88	11.66	12.38	12.32	PCDHGB2	protocadherin gamma subfamily B, 2 [Source:HGNC Symbol;Acc:HGNC:8709]
ENSG00000144063	0.371144	-1.42995	1.35318e-33	1.89955e-32	yes	down	16.5167	6.10667	19.23	14.13	16.19	6.26	5.8	6.26	MALL	mal, T cell differentiation protein like [Source:HGNC Symbol;Acc:HGNC:6818]
ENSG00000120896	0.483956	-1.04705	1.60562e-33	2.24776e-32	yes	down	49.72	24.99	46.26	48.07	54.83	24.63	23.55	26.79	SORBS3	sorbin and SH3 domain containing 3 [Source:HGNC Symbol;Acc:HGNC:30907]
ENSG00000169231	3.30302	1.72379	1.75363e-33	2.44993e-32	yes	up	4.07333	12.3667	3.06	5.08	4.08	11.87	12.16	13.07	THBS3	thrombospondin 3 [Source:HGNC Symbol;Acc:HGNC:11787]
ENSG00000130684	2.28714	1.19355	2.27313e-33	3.17139e-32	yes	up	3.29	8.33333	2.83	4.05	2.99	7.68	8.17	9.15	ZNF337	zinc finger protein 337 [Source:HGNC Symbol;Acc:HGNC:15809]
ENSG00000160570	2.21551	1.14764	2.78443e-33	3.88209e-32	yes	up	17.89	34.11	18.37	18.47	16.83	36.87	30.76	34.7	DEDD2	death effector domain containing 2 [Source:HGNC Symbol;Acc:HGNC:24450]
ENSG00000182054	0.449895	-1.15234	2.86041e-33	3.9853e-32	yes	down	28.3233	11.7167	28.5	30.81	25.66	13.32	11.2	10.63	IDH2	isocitrate dehydrogenase (NADP(+)) 2, mitochondrial [Source:HGNC Symbol;Acc:HGNC:5383]
ENSG00000072864	0.499641	-1.00104	3.40205e-33	4.73674e-32	yes	down	39.7467	14.9267	36.57	39.18	43.49	14.88	15.38	14.52	NDE1	nudE neurodevelopment protein 1 [Source:HGNC Symbol;Acc:HGNC:17619]
ENSG00000103335	0.447701	-1.15939	3.97214e-33	5.52673e-32	yes	down	161.36	72.25	173	158.33	152.75	76.34	72.3	68.11	PIEZO1	piezo type mechanosensitive ion channel component 1 [Source:HGNC Symbol;Acc:HGNC:28993]
ENSG00000148926	3.0068	1.58823	5.06966e-33	7.03944e-32	yes	up	9.76667	29.8767	8.65	9.54	11.11	28.7	34.02	26.91	ADM	adrenomedullin [Source:HGNC Symbol;Acc:HGNC:259]
ENSG00000123737	0.461589	-1.11532	5.30903e-33	7.36682e-32	yes	down	47.75	23.0867	51.51	41.23	50.51	22.73	24.17	22.36	EXOSC9	exosome component 9 [Source:HGNC Symbol;Acc:HGNC:9137]
ENSG00000008517	3.66987	1.87573	5.90651e-33	8.16822e-32	yes	up	9.61667	34.2333	8.43	9.79	10.63	33.98	36.3	32.42	IL32	interleukin 32 [Source:HGNC Symbol;Acc:HGNC:16830]
ENSG00000160223	10.7534	3.42672	5.97872e-33	8.26249e-32	yes	up	0.156667	1.72333	0.11	0.19	0.17	1.61	1.67	1.89	ICOSLG	inducible T cell costimulator ligand [Source:HGNC Symbol;Acc:HGNC:17087]
ENSG00000158023	0.431949	-1.21107	6.1829e-33	8.5389e-32	yes	down	32.8167	13.47	33.03	30.75	34.67	13.63	14.01	12.77	WDR66	WD repeat domain 66 [Source:HGNC Symbol;Acc:HGNC:28506]
ENSG00000100196	2.41496	1.272	6.99937e-33	9.64698e-32	yes	up	15.9867	37.5267	15.66	18.06	14.24	35.33	37.61	39.64	KDELR3	KDEL endoplasmic reticulum protein retention receptor 3 [Source:HGNC Symbol;Acc:HGNC:6306]
ENSG00000110031	3.61163	1.85265	7.22433e-33	9.95033e-32	yes	up	3.96667	14.41	3.46	3.85	4.59	14.18	14.02	15.03	LPXN	leupaxin [Source:HGNC Symbol;Acc:HGNC:14061]
ENSG00000003989	0.444966	-1.16823	7.38168e-33	1.01534e-31	yes	down	6.5	2.94	6.35	6.27	6.88	2.87	3.12	2.83	SLC7A2	solute carrier family 7 member 2 [Source:HGNC Symbol;Acc:HGNC:11060]
ENSG00000173727	4.88222	2.28754	1.15098e-32	1.57997e-31	yes	up	12.58	35.3067	3.01	8.03	26.7	45.78	31.28	28.86	AP000769.1	Finkel-Biskis-Reilly murine sarcoma virus (FBR-MuSV) ubiquitously expressed (FAU) pseudogene
ENSG00000198924	0.459862	-1.12073	1.5074e-32	2.06233e-31	yes	down	12.0733	5.54	12.31	11.54	12.37	5.7	5.44	5.48	DCLRE1A	DNA cross-link repair 1A [Source:HGNC Symbol;Acc:HGNC:17660]
ENSG00000150630	2.54094	1.34536	1.91228e-32	2.60929e-31	yes	up	7.12	18.8133	7.71	7.04	6.61	17.93	18.51	20	VEGFC	vascular endothelial growth factor C [Source:HGNC Symbol;Acc:HGNC:12682]
ENSG00000121005	0.471742	-1.08393	1.91404e-32	2.60996e-31	yes	down	12.8967	5.86667	13	13.28	12.41	5.65	5.8	6.15	CRISPLD1	cysteine rich secretory protein LCCL domain containing 1 [Source:HGNC Symbol;Acc:HGNC:18206]
ENSG00000149577	2.38525	1.25414	2.36036e-32	3.21e-31	yes	up	4.81667	10.14	5.8	4.65	4	9.94	9.12	11.36	SIDT2	SID1 transmembrane family member 2 [Source:HGNC Symbol;Acc:HGNC:24272]
ENSG00000177675	2.11572	1.08115	2.39549e-32	3.25344e-31	yes	up	9.44333	22.2033	10.12	10.47	7.74	22.97	19.1	24.54	CD163L1	CD163 molecule like 1 [Source:HGNC Symbol;Acc:HGNC:30375]
ENSG00000129173	0.0757967	-3.72172	2.79948e-32	3.79458e-31	yes	down	3.21	0.243333	3.8	3.17	2.66	0.16	0.27	0.3	E2F8	E2F transcription factor 8 [Source:HGNC Symbol;Acc:HGNC:24727]
ENSG00000106868	0.48682	-1.03854	3.21731e-32	4.35805e-31	yes	down	18.14	9.42333	18.47	18.19	17.76	8.05	10.12	10.1	SUSD1	sushi domain containing 1 [Source:HGNC Symbol;Acc:HGNC:25413]
ENSG00000100726	0.464423	-1.10649	3.71264e-32	5.02568e-31	yes	down	22.9967	12.04	22.39	21.74	24.86	11.23	13.01	11.88	TELO2	telomere maintenance 2 [Source:HGNC Symbol;Acc:HGNC:29099]
ENSG00000188396	8.01198	3.00216	3.78398e-32	5.11886e-31	yes	up	0.826667	9.91333	0.71	0.94	0.83	11.16	8.42	10.16	TCTEX1D4	Tctex1 domain containing 4 [Source:HGNC Symbol;Acc:HGNC:32315]
ENSG00000185745	2.957	1.56414	4.12202e-32	5.5688e-31	yes	up	4.26667	14.0733	3.83	4.09	4.88	14.26	13.8	14.16	IFIT1	interferon induced protein with tetratricopeptide repeats 1 [Source:HGNC Symbol;Acc:HGNC:5407]
ENSG00000115687	0.292812	-1.77195	4.57359e-32	6.16666e-31	yes	down	7.30333	2.51333	7.34	8.56	6.01	1.85	2.91	2.78	PASK	PAS domain containing serine/threonine kinase [Source:HGNC Symbol;Acc:HGNC:17270]
ENSG00000184584	2.04305	1.03073	4.77557e-32	6.43476e-31	yes	up	16.9733	34.7233	16.49	16.93	17.5	33.01	36.26	34.9	TMEM173	transmembrane protein 173 [Source:HGNC Symbol;Acc:HGNC:27962]
ENSG00000274180	2.55128	1.35122	7.12157e-32	9.52069e-31	yes	up	3.39333	8.83	3.42	3.89	2.87	9.2	8.56	8.73	NATD1	N-acetyltransferase domain containing 1 [Source:HGNC Symbol;Acc:HGNC:30770]
ENSG00000051620	2.30549	1.20507	8.05696e-32	1.07361e-30	yes	up	9.13	27.58	6.92	8.45	12.02	22.32	32.64	27.78	HEBP2	heme binding protein 2 [Source:HGNC Symbol;Acc:HGNC:15716]
ENSG00000132763	0.290023	-1.78576	1.04205e-31	1.38317e-30	yes	down	8.09	2.04667	8.59	7.75	7.93	1.87	2.36	1.91	MMACHC	metabolism of cobalamin associated C [Source:HGNC Symbol;Acc:HGNC:24525]
ENSG00000172159	0.443968	-1.17147	1.17461e-31	1.55409e-30	yes	down	8.89	4.13333	8.91	9.13	8.63	4.3	4.22	3.88	FRMD3	FERM domain containing 3 [Source:HGNC Symbol;Acc:HGNC:24125]
ENSG00000118596	0.494976	-1.01457	1.26112e-31	1.66638e-30	yes	down	4.62	2.92	4.72	4.44	4.7	4.06	2.26	2.44	SLC16A7	solute carrier family 16 member 7 [Source:HGNC Symbol;Acc:HGNC:10928]
ENSG00000100629	0.332612	-1.58809	1.35433e-31	1.78494e-30	yes	down	7.73667	2.6	7.87	6.75	8.59	2.12	3.24	2.44	CEP128	centrosomal protein 128 [Source:HGNC Symbol;Acc:HGNC:20359]
ENSG00000164932	2.04487	1.03201	1.53395e-31	2.01907e-30	yes	up	58.8567	121.607	47.98	63.77	64.82	125.84	115.9	123.08	CTHRC1	collagen triple helix repeat containing 1 [Source:HGNC Symbol;Acc:HGNC:18831]
ENSG00000110090	3.26808	1.70844	1.99503e-31	2.61925e-30	yes	up	1.69333	5.65667	1.89	1.44	1.75	5.38	6.1	5.49	CPT1A	carnitine palmitoyltransferase 1A [Source:HGNC Symbol;Acc:HGNC:2328]
ENSG00000275216	0.458213	-1.12591	2.04195e-31	2.67912e-30	yes	down	22.1433	10.23	26	21.62	18.81	10.03	11.39	9.27	AL161431.1	novel transcript
ENSG00000113369	2.15367	1.1068	2.24444e-31	2.94104e-30	yes	up	6.04	12.94	5.95	6.44	5.73	14.21	12.47	12.14	ARRDC3	arrestin domain containing 3 [Source:HGNC Symbol;Acc:HGNC:29263]
ENSG00000248583	2.79094	1.48075	2.49712e-31	3.26587e-30	yes	up	42.44	120.327	42.3	39.18	45.84	131.57	112.85	116.56	AC119751.3	ankyrin repeat domain family (ANKRD) pseudogene
ENSG00000160214	0.475382	-1.07284	3.03575e-31	3.96526e-30	yes	down	20.89	9.43667	21.14	21.52	20.01	9.45	9.36	9.5	RRP1	ribosomal RNA processing 1 [Source:HGNC Symbol;Acc:HGNC:18785]
ENSG00000145569	0.355262	-1.49304	3.54754e-31	4.62785e-30	yes	down	5.33667	1.59333	4.92	6.22	4.87	1.6	1.51	1.67	OTULINL	OTU deubiquitinase with linear linkage specificity like [Source:HGNC Symbol;Acc:HGNC:25629]
ENSG00000179409	0.480897	-1.0562	5.85018e-31	7.58819e-30	yes	down	19.94	9.87667	22.67	18.81	18.34	10.4	9.39	9.84	GEMIN4	gem nuclear organelle associated protein 4 [Source:HGNC Symbol;Acc:HGNC:15717]
ENSG00000264668	2.00671	1.00483	6.62489e-31	8.58762e-30	yes	up	6.83	14.9467	7.76	6.78	5.95	14.87	14.52	15.45	AC138696.1	Zinc finger protein 41 homolog [Source:UniProtKB/Swiss-Prot;Acc:Q8N8Y5]
ENSG00000169683	0.313604	-1.67299	6.72727e-31	8.71481e-30	yes	down	14.3133	4.95	12.61	14.96	15.37	3.93	5.72	5.2	LRRC45	leucine rich repeat containing 45 [Source:HGNC Symbol;Acc:HGNC:28302]
ENSG00000100479	0.253746	-1.97855	1.16478e-30	1.50415e-29	yes	down	16.86	3.17333	18.49	16.39	15.7	3.32	3.13	3.07	POLE2	DNA polymerase epsilon 2, accessory subunit [Source:HGNC Symbol;Acc:HGNC:9178]
ENSG00000213903	3.02532	1.59709	1.35859e-30	1.74891e-29	yes	up	4.26333	11.5	2.9	3.84	6.05	11.23	12.18	11.09	LTB4R	leukotriene B4 receptor [Source:HGNC Symbol;Acc:HGNC:6713]
ENSG00000031691	0.2955	-1.75877	1.51708e-30	1.9505e-29	yes	down	16.8133	5.03667	15.75	15.99	18.7	4.65	5.93	4.53	CENPQ	centromere protein Q [Source:HGNC Symbol;Acc:HGNC:21347]
ENSG00000231607	0.191947	-2.38122	1.69866e-30	2.18121e-29	yes	down	14.15	3.13667	13.42	14.21	14.82	2.75	2.73	3.93	DLEU2	deleted in lymphocytic leukemia 2 [Source:HGNC Symbol;Acc:HGNC:13748]
ENSG00000188596	0.377877	-1.40401	1.76591e-30	2.26614e-29	yes	down	7.29333	2.64333	5.65	8.13	8.1	2.67	2.63	2.63	CFAP54	cilia and flagella associated protein 54 [Source:HGNC Symbol;Acc:HGNC:26456]
ENSG00000153233	3.05045	1.60902	2.67534e-30	3.42033e-29	yes	up	5.31667	16.45	5.22	5.44	5.29	16.19	15.54	17.62	PTPRR	protein tyrosine phosphatase, receptor type R [Source:HGNC Symbol;Acc:HGNC:9680]
ENSG00000178031	0.467179	-1.09795	2.76549e-30	3.53337e-29	yes	down	16.9967	8.35	18.74	17.96	14.29	8.04	8.77	8.24	ADAMTSL1	ADAMTS like 1 [Source:HGNC Symbol;Acc:HGNC:14632]
ENSG00000103047	0.435931	-1.19783	3.207e-30	4.09237e-29	yes	down	8.40333	3.82	8.63	7.74	8.84	4.4	3.42	3.64	TANGO6	transport and golgi organization 6 homolog [Source:HGNC Symbol;Acc:HGNC:25749]
ENSG00000169750	0.244442	-2.03244	3.46951e-30	4.42185e-29	yes	down	24.66	6.29	23.66	25.1	25.22	4.75	6.51	7.61	RAC3	Rac family small GTPase 3 [Source:NCBI gene;Acc:5881]
ENSG00000105146	3.23572	1.69409	3.74034e-30	4.75812e-29	yes	up	1.50667	3.94333	1.22	2.12	1.18	3.75	3.7	4.38	AURKC	aurora kinase C [Source:HGNC Symbol;Acc:HGNC:11391]
ENSG00000259316	0.102143	-3.29134	5.58039e-30	7.0507e-29	yes	down	95.8567	7.66333	105.36	111.53	70.68	8.27	11.53	3.19	AC087632.1	novel transcript
ENSG00000250081	0.266312	-1.90881	6.49992e-30	8.1923e-29	yes	down	3.17333	0.97	1.93	4.82	2.77	0.49	1.46	0.96	AC025176.1	novel transcript
ENSG00000179958	0.374424	-1.41726	7.65662e-30	9.62057e-29	yes	down	39.0267	15.2467	42.54	35.05	39.49	13.32	16.75	15.67	DCTPP1	dCTP pyrophosphatase 1 [Source:HGNC Symbol;Acc:HGNC:28777]
ENSG00000077942	0.26325	-1.9255	1.04763e-29	1.31393e-28	yes	down	9.18	2.40667	9.76	9.27	8.51	2.49	2.53	2.2	FBLN1	fibulin 1 [Source:HGNC Symbol;Acc:HGNC:3600]
ENSG00000106617	0.489146	-1.03166	1.19751e-29	1.50099e-28	yes	down	30.73	14.1067	31.38	28.6	32.21	14.53	13.46	14.33	PRKAG2	protein kinase AMP-activated non-catalytic subunit gamma 2 [Source:HGNC Symbol;Acc:HGNC:9386]
ENSG00000224032	2.01352	1.00972	1.24564e-29	1.55845e-28	yes	up	16.5967	42.4833	16.08	18.96	14.75	43.14	37.6	46.71	EPB41L4A-AS1	EPB41L4A antisense RNA 1 [Source:HGNC Symbol;Acc:HGNC:30749]
ENSG00000104147	0.218143	-2.19666	1.50348e-29	1.87418e-28	yes	down	21.9233	4.78667	26.58	19.03	20.16	5.89	4.01	4.46	OIP5	Opa interacting protein 5 [Source:HGNC Symbol;Acc:HGNC:20300]
ENSG00000175567	0.17315	-2.52991	1.78929e-29	2.221e-28	yes	down	11.6533	2.49333	10.16	12.27	12.53	2.65	3.01	1.82	UCP2	uncoupling protein 2 [Source:HGNC Symbol;Acc:HGNC:12518]
ENSG00000177917	0.492405	-1.02208	1.9585e-29	2.42661e-28	yes	down	31.6167	17.1267	29.16	31.32	34.37	19.47	14.84	17.07	ARL6IP6	ADP ribosylation factor like GTPase 6 interacting protein 6 [Source:HGNC Symbol;Acc:HGNC:24048]
ENSG00000135931	2.28898	1.1947	2.86466e-29	3.53228e-28	yes	up	8.77333	18.3733	7.44	9.64	9.24	17.88	18.3	18.94	ARMC9	armadillo repeat containing 9 [Source:HGNC Symbol;Acc:HGNC:20730]
ENSG00000166938	0.395973	-1.33653	3.75276e-29	4.61069e-28	yes	down	13.43	4.69333	16.73	10.71	12.85	4.65	5.33	4.1	DIS3L	DIS3 like exosome 3'-5' exoribonuclease [Source:HGNC Symbol;Acc:HGNC:28698]
ENSG00000106638	2.00379	1.00273	3.77907e-29	4.64024e-28	yes	up	16.5533	32.0667	18.95	16.33	14.38	34.29	26.88	35.03	TBL2	transducin beta like 2 [Source:HGNC Symbol;Acc:HGNC:11586]
ENSG00000198157	0.400929	-1.31858	4.16599e-29	5.11226e-28	yes	down	54.8333	22.1833	53.94	58.89	51.67	22.52	22.85	21.18	HMGN5	high mobility group nucleosome binding domain 5 [Source:HGNC Symbol;Acc:HGNC:8013]
ENSG00000272668	3.28197	1.71456	4.29689e-29	5.26974e-28	yes	up	0.96	3.18333	0.82	0.96	1.1	3.16	3.13	3.26	AL590560.2	novel transcript, antisense to VSIG8
ENSG00000137135	0.139236	-2.84439	5.14674e-29	6.30068e-28	yes	down	4.45667	0.656667	4.74	4.93	3.7	0.97	0.59	0.41	ARHGEF39	Rho guanine nucleotide exchange factor 39 [Source:HGNC Symbol;Acc:HGNC:25909]
ENSG00000185361	0.345526	-1.53313	6.10733e-29	7.45437e-28	yes	down	7.52	2.67	7.19	8.31	7.06	2.85	2.65	2.51	TNFAIP8L1	TNF alpha induced protein 8 like 1 [Source:HGNC Symbol;Acc:HGNC:28279]
ENSG00000126453	0.408953	-1.28999	6.70865e-29	8.18343e-28	yes	down	52.67	21.7267	55.57	49.87	52.57	22.27	18.31	24.6	BCL2L12	BCL2 like 12 [Source:HGNC Symbol;Acc:HGNC:13787]
ENSG00000104081	15.56	3.95977	7.72952e-29	9.37846e-28	yes	up	0.743333	11.9133	0.5	0.96	0.77	12.16	11.91	11.67	BMF	Bcl2 modifying factor [Source:HGNC Symbol;Acc:HGNC:24132]
ENSG00000173638	0.411114	-1.28239	9.39752e-29	1.13753e-27	yes	down	12.7433	5.37333	10.93	12.8	14.5	5.95	5.09	5.08	SLC19A1	solute carrier family 19 member 1 [Source:HGNC Symbol;Acc:HGNC:10937]
ENSG00000132773	0.40743	-1.29538	9.49319e-29	1.14843e-27	yes	down	24.53	10.0567	24.72	23.49	25.38	8.93	10.87	10.37	TOE1	target of EGR1, exonuclease [Source:HGNC Symbol;Acc:HGNC:15954]
ENSG00000283265	2.70278	1.43444	1.09502e-28	1.32158e-27	yes	up	2.62333	6.01333	3.28	2.46	2.13	5.4	6.79	5.85	AL356234.3	novel transcript
ENSG00000076770	0.248901	-2.00635	1.36854e-28	1.64683e-27	yes	down	2.17	0.723333	1.61	2.22	2.68	0.96	0.63	0.58	MBNL3	muscleblind like splicing regulator 3 [Source:HGNC Symbol;Acc:HGNC:20564]
ENSG00000109083	2.02159	1.01549	1.72338e-28	2.07018e-27	yes	up	35.18	76.63	33.71	36.27	35.56	78.63	76.62	74.64	IFT20	intraflagellar transport 20 [Source:HGNC Symbol;Acc:HGNC:30989]
ENSG00000151466	0.48008	-1.05865	1.75442e-28	2.105e-27	yes	down	21.4667	10.31	21.47	20.68	22.25	10.16	10.79	9.98	SCLT1	sodium channel and clathrin linker 1 [Source:HGNC Symbol;Acc:HGNC:26406]
ENSG00000101945	0.205322	-2.28404	1.97807e-28	2.37055e-27	yes	down	6.75333	1.33667	7.09	5.4	7.77	1.02	1.28	1.71	SUV39H1	suppressor of variegation 3-9 homolog 1 [Source:HGNC Symbol;Acc:HGNC:11479]
ENSG00000268089	0.240061	-2.05852	1.9906e-28	2.38418e-27	yes	down	2.61667	0.64	2.39	2.9	2.56	0.68	0.67	0.57	GABRQ	gamma-aminobutyric acid type A receptor theta subunit [Source:HGNC Symbol;Acc:HGNC:14454]
ENSG00000135698	0.481937	-1.05308	2.31194e-28	2.7642e-27	yes	down	63.0467	31.59	61.75	65.88	61.51	28.43	34.16	32.18	MPHOSPH6	M-phase phosphoprotein 6 [Source:HGNC Symbol;Acc:HGNC:7214]
ENSG00000197982	2.29946	1.20129	2.38261e-28	2.84538e-27	yes	up	21.4367	49.4467	19.53	21.41	23.37	50.3	44.92	53.12	C1orf122	chromosome 1 open reading frame 122 [Source:HGNC Symbol;Acc:HGNC:24789]
ENSG00000159055	0.341892	-1.54839	2.47259e-28	2.94767e-27	yes	down	21.2367	7.24	19.24	21.95	22.52	6.66	8.26	6.8	MIS18A	MIS18 kinetochore protein A [Source:HGNC Symbol;Acc:HGNC:1286]
ENSG00000187123	0.310368	-1.68795	3.4919e-28	4.14835e-27	yes	down	5.52	1.72333	5.56	5.68	5.32	1.67	1.88	1.62	LYPD6	LY6/PLAUR domain containing 6 [Source:HGNC Symbol;Acc:HGNC:28751]
ENSG00000060762	2.31058	1.20826	4.30288e-28	5.08818e-27	yes	up	23.1767	54.9867	23.8	23.77	21.96	53.7	52.08	59.18	MPC1	mitochondrial pyruvate carrier 1 [Source:HGNC Symbol;Acc:HGNC:21606]
ENSG00000120742	2.12483	1.08735	4.50294e-28	5.31861e-27	yes	up	116.553	286.46	92.93	116.74	139.99	296.48	268.89	294.01	SERP1	stress associated endoplasmic reticulum protein 1 [Source:HGNC Symbol;Acc:HGNC:10759]
ENSG00000176208	0.312362	-1.67871	5.50194e-28	6.48735e-27	yes	down	3.34667	1.58333	3.74	3.23	3.07	1.25	2.1	1.4	ATAD5	ATPase family, AAA domain containing 5 [Source:HGNC Symbol;Acc:HGNC:25752]
ENSG00000081803	2.34667	1.23061	5.86433e-28	6.91066e-27	yes	up	4.39333	11.0533	5.27	4.13	3.78	10.61	10.86	11.69	CADPS2	calcium dependent secretion activator 2 [Source:HGNC Symbol;Acc:HGNC:16018]
ENSG00000125968	0.402652	-1.3124	8.31622e-28	9.73283e-27	yes	down	58.68	24.5833	66.07	51.04	58.93	27.49	23.03	23.23	ID1	inhibitor of DNA binding 1, HLH protein [Source:HGNC Symbol;Acc:HGNC:5360]
ENSG00000049541	0.382474	-1.38657	1.00252e-27	1.17196e-26	yes	down	26.0467	9.91667	29.36	24.93	23.85	9.36	9.79	10.6	RFC2	replication factor C subunit 2 [Source:HGNC Symbol;Acc:HGNC:9970]
ENSG00000095752	3.4508	1.78693	1.22795e-27	1.43058e-26	yes	up	4.16	12.7167	3.93	3.45	5.1	13.13	13.15	11.87	IL11	interleukin 11 [Source:HGNC Symbol;Acc:HGNC:5966]
ENSG00000171703	2.43499	1.28391	1.26203e-27	1.46945e-26	yes	up	15.9433	35.9	15.27	17.19	15.37	37.06	33.58	37.06	TCEA2	transcription elongation factor A2 [Source:HGNC Symbol;Acc:HGNC:11614]
ENSG00000187957	0.462161	-1.11353	1.32918e-27	1.54676e-26	yes	down	14.84	6.85333	14.27	15.63	14.62	6.26	7.13	7.17	DNER	delta/notch like EGF repeat containing [Source:HGNC Symbol;Acc:HGNC:24456]
ENSG00000106355	0.481251	-1.05514	1.66752e-27	1.9328e-26	yes	down	53.63	25.4333	54.9	45.88	60.11	23.93	25.15	27.22	LSM5	LSM5 homolog, U6 small nuclear RNA and mRNA degradation associated [Source:HGNC Symbol;Acc:HGNC:17162]
ENSG00000160783	0.424215	-1.23713	1.88291e-27	2.17752e-26	yes	down	44.9733	19.6967	45.45	45.31	44.16	20.99	20.98	17.12	PMF1	polyamine modulated factor 1 [Source:HGNC Symbol;Acc:HGNC:9112]
ENSG00000106462	0.495538	-1.01293	2.37826e-27	2.74264e-26	yes	down	24.4267	11.66	24.82	25.04	23.42	10.71	11.34	12.93	EZH2	enhancer of zeste 2 polycomb repressive complex 2 subunit [Source:HGNC Symbol;Acc:HGNC:3527]
ENSG00000171223	3.58524	1.84207	2.46236e-27	2.83642e-26	yes	up	27.38	99.7033	21.46	28.22	32.46	103	97.43	98.68	JUNB	JunB proto-oncogene, AP-1 transcription factor subunit [Source:HGNC Symbol;Acc:HGNC:6205]
ENSG00000152240	0.368077	-1.44192	2.78288e-27	3.19844e-26	yes	down	36.4367	14.6033	34.34	36.31	38.66	14.68	16.91	12.22	HAUS1	HAUS augmin like complex subunit 1 [Source:HGNC Symbol;Acc:HGNC:25174]
ENSG00000100100	4.31359	2.10889	3.02026e-27	3.46694e-26	yes	up	1.63667	7.18	1.3	1.74	1.87	8.3	6.58	6.66	PIK3IP1	phosphoinositide-3-kinase interacting protein 1 [Source:HGNC Symbol;Acc:HGNC:24942]
ENSG00000284753	2.36454	1.24156	3.61054e-27	4.13114e-26	yes	up	9.78333	23.6067	10.5	10.5	8.35	23.64	23.88	23.3	EEF1AKMT4	EEF1A lysine methyltransferase 4 [Source:HGNC Symbol;Acc:HGNC:53611]
ENSG00000279497	0.379382	-1.39828	3.67696e-27	4.20244e-26	yes	down	3.9	1.44333	4.75	3.54	3.41	1.42	1.49	1.42	AP003784.1	novel transcript
ENSG00000150456	0.246072	-2.02285	3.8088e-27	4.3507e-26	yes	down	20.18	5.16667	21.37	20.04	19.13	5.72	5.31	4.47	EEF1AKMT1	EEF1A lysine methyltransferase 1 [Source:HGNC Symbol;Acc:HGNC:27351]
ENSG00000165501	0.420485	-1.24988	5.36279e-27	6.08506e-26	yes	down	35.9167	15.2967	36.7	32.04	39.01	14.27	17.48	14.14	LRR1	leucine rich repeat protein 1 [Source:HGNC Symbol;Acc:HGNC:19742]
ENSG00000155755	0.473325	-1.0791	9.28769e-27	1.04632e-25	yes	down	27.7567	12.18	27.87	25.31	30.09	11.9	12.73	11.91	TMEM237	transmembrane protein 237 [Source:HGNC Symbol;Acc:HGNC:14432]
ENSG00000173085	0.299211	-1.74076	9.55139e-27	1.07485e-25	yes	down	19.36	5.81667	18.34	19.21	20.53	4.7	5.13	7.62	COQ2	coenzyme Q2, polyprenyltransferase [Source:HGNC Symbol;Acc:HGNC:25223]
ENSG00000281883	3.59647	1.84658	1.01559e-26	1.14162e-25	yes	up	2.25667	8.36667	2.25	2.28	2.24	7.72	7.18	10.2	AL512506.3	novel transcript
ENSG00000166845	0.45629	-1.13198	1.11542e-26	1.2504e-25	yes	down	10.76	4.19667	10.55	10	11.73	4.35	4	4.24	C18orf54	chromosome 18 open reading frame 54 [Source:HGNC Symbol;Acc:HGNC:13796]
ENSG00000132017	0.445017	-1.16807	1.13433e-26	1.27091e-25	yes	down	20.6833	9.59	22.2	19.53	20.32	10.75	9.23	8.79	DCAF15	DDB1 and CUL4 associated factor 15 [Source:HGNC Symbol;Acc:HGNC:25095]
ENSG00000278599	4.02826	2.01016	1.16347e-26	1.30284e-25	yes	up	2.40333	10.13	2.43	2.34	2.44	10.7	11.09	8.6	TBC1D3E	TBC1 domain family member 3E [Source:HGNC Symbol;Acc:HGNC:27071]
ENSG00000106399	0.454251	-1.13844	1.92351e-26	2.14106e-25	yes	down	60.05	23.7833	58.84	62.08	59.23	22.84	26.43	22.08	RPA3	replication protein A3 [Source:HGNC Symbol;Acc:HGNC:10291]
ENSG00000164532	0.394472	-1.34201	2.5853e-26	2.87456e-25	yes	down	5.03667	2.01	5.49	4.98	4.64	2.05	2.1	1.88	TBX20	T-box 20 [Source:HGNC Symbol;Acc:HGNC:11598]
ENSG00000240024	2.5597	1.35597	2.8811e-26	3.19134e-25	yes	up	12.3333	30.73	11.55	11.46	13.99	30.81	31.86	29.52	LINC00888	long intergenic non-protein coding RNA 888 [Source:HGNC Symbol;Acc:HGNC:48575]
ENSG00000166257	4.97243	2.31395	3.90326e-26	4.30262e-25	yes	up	0.506667	2.58	0.54	0.35	0.63	2.76	2.35	2.63	SCN3B	sodium voltage-gated channel beta subunit 3 [Source:HGNC Symbol;Acc:HGNC:20665]
ENSG00000173918	2.92587	1.54886	4.5318e-26	4.9901e-25	yes	up	3.46667	10.6367	3.34	3.49	3.57	9.42	11.38	11.11	C1QTNF1	C1q and TNF related 1 [Source:HGNC Symbol;Acc:HGNC:14324]
ENSG00000088340	3.33729	1.73868	7.51953e-26	8.2401e-25	yes	up	3.15667	9.67333	2.8	2.99	3.68	9.54	9.47	10.01	FER1L4	fer-1 like family member 4, pseudogene [Source:HGNC Symbol;Acc:HGNC:15801]
ENSG00000187134	2.05482	1.03901	7.85869e-26	8.60256e-25	yes	up	43.2933	82.1	58.6	31.23	40.05	84.42	81.51	80.37	AKR1C1	aldo-keto reductase family 1 member C1 [Source:HGNC Symbol;Acc:HGNC:384]
ENSG00000152455	0.436281	-1.19667	8.49982e-26	9.2994e-25	yes	down	24.7933	10.9733	25.17	19.8	29.41	9.6	13.04	10.28	SUV39H2	suppressor of variegation 3-9 homolog 2 [Source:HGNC Symbol;Acc:HGNC:17287]
ENSG00000118777	0.210981	-2.24482	8.85217e-26	9.6694e-25	yes	down	4.06	0.846667	4.24	4.11	3.83	0.74	1.06	0.74	ABCG2	ATP binding cassette subfamily G member 2 (Junior blood group) [Source:HGNC Symbol;Acc:HGNC:74]
ENSG00000110042	3.35588	1.74669	1.01554e-25	1.10753e-24	yes	up	1.25333	3.22	0.81	0.99	1.96	3.28	3.27	3.11	DTX4	deltex E3 ubiquitin ligase 4 [Source:HGNC Symbol;Acc:HGNC:29151]
ENSG00000069667	2.82641	1.49897	1.16226e-25	1.26349e-24	yes	up	4.13	8.89333	2.85	5.59	3.95	9.37	10.01	7.3	RORA	RAR related orphan receptor A [Source:HGNC Symbol;Acc:HGNC:10258]
ENSG00000158286	3.04023	1.60418	1.32795e-25	1.44056e-24	yes	up	4.07	13.1367	3.83	5.94	2.44	11.59	11.1	16.72	RNF207	ring finger protein 207 [Source:HGNC Symbol;Acc:HGNC:32947]
ENSG00000125885	0.391219	-1.35395	1.37358e-25	1.48848e-24	yes	down	7.41	3.03667	7.25	8.42	6.56	2.86	3.27	2.98	MCM8	minichromosome maintenance 8 homologous recombination repair factor [Source:HGNC Symbol;Acc:HGNC:16147]
ENSG00000119138	2.36939	1.24451	1.45951e-25	1.57993e-24	yes	up	3.13667	7.53333	2.71	3.46	3.24	7.95	7.66	6.99	KLF9	Kruppel like factor 9 [Source:HGNC Symbol;Acc:HGNC:1123]
ENSG00000179862	3.7157	1.89363	1.60557e-25	1.73437e-24	yes	up	6.71	21.7867	5.8	5.93	8.4	19.81	22.7	22.85	CITED4	Cbp/p300 interacting transactivator with Glu/Asp rich carboxy-terminal domain 4 [Source:HGNC Symbol;Acc:HGNC:18696]
ENSG00000181104	0.475341	-1.07297	1.69588e-25	1.83e-24	yes	down	12.65	6.10667	11.77	12.72	13.46	6.63	5.81	5.88	F2R	coagulation factor II thrombin receptor [Source:HGNC Symbol;Acc:HGNC:3537]
ENSG00000121211	0.238449	-2.06825	2.12365e-25	2.28557e-24	yes	down	26.31	6.31	25.33	27.38	26.22	5.75	8.59	4.59	MND1	meiotic nuclear divisions 1 [Source:HGNC Symbol;Acc:HGNC:24839]
ENSG00000125247	0.441533	-1.17941	2.65328e-25	2.84661e-24	yes	down	15.1767	6.91	15.85	15.03	14.65	6.83	7.81	6.09	TMTC4	transmembrane and tetratricopeptide repeat containing 4 [Source:HGNC Symbol;Acc:HGNC:25904]
ENSG00000258634	2.35164	1.23367	3.77856e-25	4.04541e-24	yes	up	3.23333	7.74	3.39	3.33	2.98	7.45	7.93	7.84	AL160006.1	novel transcript, antisense to ALX3
ENSG00000160298	0.318364	-1.65125	4.02387e-25	4.3058e-24	yes	down	5.89333	2.30667	6.41	5.59	5.68	2.28	1.88	2.76	C21orf58	chromosome 21 open reading frame 58 [Source:HGNC Symbol;Acc:HGNC:1300]
ENSG00000205707	2.27201	1.18397	4.13656e-25	4.42363e-24	yes	up	17.7967	41.0467	17.76	18.1	17.53	43.25	40.31	39.58	ETFRF1	electron transfer flavoprotein regulatory factor 1 [Source:HGNC Symbol;Acc:HGNC:27052]
ENSG00000177337	2.10295	1.07242	5.02103e-25	5.35882e-24	yes	up	15.6133	29.2233	20.88	12.37	13.59	28.1	30.9	28.67	DLGAP1-AS1	DLGAP1 antisense RNA 1 [Source:HGNC Symbol;Acc:HGNC:31676]
ENSG00000196295	2.13481	1.09411	5.71496e-25	6.08358e-24	yes	up	9.13	9.99667	7.88	10.87	8.64	8.86	10.99	10.14	GARS-DT	GARS divergent transcript [Source:HGNC Symbol;Acc:HGNC:48951]
ENSG00000159147	0.489612	-1.03029	6.37896e-25	6.77281e-24	yes	down	26.7067	13.25	27.22	25.83	27.07	13.96	14.74	11.05	DONSON	downstream neighbor of SON [Source:HGNC Symbol;Acc:HGNC:2993]
ENSG00000179094	4.3627	2.12522	6.50079e-25	6.89858e-24	yes	up	1.74	6.47667	1.03	1.99	2.2	6.16	5.51	7.76	AC129492.1	period circadian regulator 1 [Source:NCBI gene;Acc:5187]
ENSG00000144395	0.216798	-2.20558	7.40431e-25	7.8452e-24	yes	down	6.37333	1.29667	6.94	6.6	5.58	1.34	1.3	1.25	CCDC150	coiled-coil domain containing 150 [Source:HGNC Symbol;Acc:HGNC:26834]
ENSG00000170919	2.13409	1.09362	8.93734e-25	9.45973e-24	yes	up	16.9033	34.1267	17.3	18.01	15.4	36.2	31.81	34.37	TPT1-AS1	TPT1 antisense RNA 1 [Source:HGNC Symbol;Acc:HGNC:43686]
ENSG00000281571	3.58976	1.84389	9.536e-25	1.00726e-23	yes	up	6.34667	22.8167	5.4	5.65	7.99	22.62	23.72	22.11	AC241585.2	TEC
ENSG00000182010	0.165779	-2.59266	1.05172e-24	1.10861e-23	yes	down	2.52	0.5	2.5	2.51	2.55	0.4	0.42	0.68	RTKN2	rhotekin 2 [Source:HGNC Symbol;Acc:HGNC:19364]
ENSG00000182742	0.448763	-1.15597	1.12158e-24	1.18164e-23	yes	down	26.88	12.24	28.03	23.39	29.22	11.39	11.59	13.74	HOXB4	homeobox B4 [Source:HGNC Symbol;Acc:HGNC:5115]
ENSG00000140092	0.165168	-2.59799	1.22384e-24	1.28673e-23	yes	down	5.59333	1.09667	6.28	5.14	5.36	1.15	1.45	0.69	FBLN5	fibulin 5 [Source:HGNC Symbol;Acc:HGNC:3602]
ENSG00000007968	0.0680525	-3.87721	1.28519e-24	1.34985e-23	yes	down	1.48	0.103333	1.7	1.27	1.47	0.13	0.07	0.11	E2F2	E2F transcription factor 2 [Source:HGNC Symbol;Acc:HGNC:3114]
ENSG00000285269	5.79155	2.53395	1.35426e-24	1.4202e-23	yes	up	0.87	5.02	0.7	0.61	1.3	4.34	4.89	5.83	AL160269.1	solute carrier family 35 member D2 [Source:NCBI gene;Acc:11046]
ENSG00000139508	2.76306	1.46627	1.67236e-24	1.74753e-23	yes	up	3.50667	10.2733	2.99	3.6	3.93	10.23	10.76	9.83	SLC46A3	solute carrier family 46 member 3 [Source:HGNC Symbol;Acc:HGNC:27501]
ENSG00000148384	0.474158	-1.07656	1.76655e-24	1.84126e-23	yes	down	11.6933	5.57667	12.05	11.41	11.62	5.19	5.92	5.62	INPP5E	inositol polyphosphate-5-phosphatase E [Source:HGNC Symbol;Acc:HGNC:21474]
ENSG00000163710	0.339964	-1.55655	1.88216e-24	1.95976e-23	yes	down	17.9267	6.30667	19.35	15.24	19.19	5.4	6.37	7.15	PCOLCE2	procollagen C-endopeptidase enhancer 2 [Source:HGNC Symbol;Acc:HGNC:8739]
ENSG00000101000	0.458857	-1.12388	1.99868e-24	2.08002e-23	yes	down	34.08	15.5467	33.72	36.15	32.37	15.89	16.27	14.48	PROCR	protein C receptor [Source:HGNC Symbol;Acc:HGNC:9452]
ENSG00000130477	2.05053	1.036	2.03714e-24	2.11682e-23	yes	up	2.6	6.06	2.18	3.45	2.17	5.6	6.19	6.39	UNC13A	unc-13 homolog A [Source:HGNC Symbol;Acc:HGNC:23150]
ENSG00000153956	0.361535	-1.46779	3.06615e-24	3.16681e-23	yes	down	5.4	1.85667	6.54	3.3	6.36	1.05	3.27	1.25	CACNA2D1	calcium voltage-gated channel auxiliary subunit alpha2delta 1 [Source:HGNC Symbol;Acc:HGNC:1399]
ENSG00000120738	6.53135	2.70738	3.86195e-24	3.97471e-23	yes	up	3.03	20.06	1.99	3.79	3.31	19.59	21.38	19.21	EGR1	early growth response 1 [Source:HGNC Symbol;Acc:HGNC:3238]
ENSG00000184949	4.54666	2.18481	4.51309e-24	4.62626e-23	yes	up	0.57	2.69333	0.55	0.43	0.73	2	3.33	2.75	FAM227A	family with sequence similarity 227 member A [Source:HGNC Symbol;Acc:HGNC:44197]
ENSG00000100311	4.16426	2.05806	4.5861e-24	4.69874e-23	yes	up	1.72667	6.16333	0.94	2.55	1.69	6.05	6.93	5.51	PDGFB	platelet derived growth factor subunit B [Source:HGNC Symbol;Acc:HGNC:8800]
ENSG00000176225	0.423225	-1.2405	4.6556e-24	4.76757e-23	yes	down	6.39	2.8	6.98	5.67	6.52	2.74	3.11	2.55	RTTN	rotatin [Source:HGNC Symbol;Acc:HGNC:18654]
ENSG00000162174	0.324473	-1.62383	4.83402e-24	4.9478e-23	yes	down	12.84	5.21333	14.62	11.72	12.18	4.41	5.47	5.76	ASRGL1	asparaginase like 1 [Source:HGNC Symbol;Acc:HGNC:16448]
ENSG00000155629	0.416622	-1.26319	5.58629e-24	5.70637e-23	yes	down	6.56333	2.74667	6.89	6.05	6.75	2.94	2.82	2.48	PIK3AP1	phosphoinositide-3-kinase adaptor protein 1 [Source:HGNC Symbol;Acc:HGNC:30034]
ENSG00000153044	0.387315	-1.36842	5.89006e-24	6.01068e-23	yes	down	37.1167	15.1733	34.58	35.12	41.65	13.82	19.85	11.85	CENPH	centromere protein H [Source:HGNC Symbol;Acc:HGNC:17268]
ENSG00000198203	3.21412	1.68442	7.61186e-24	7.74458e-23	yes	up	1.75333	4.72	1.58	1.35	2.33	4.21	5.68	4.27	SULT1C2	sulfotransferase family 1C member 2 [Source:HGNC Symbol;Acc:HGNC:11456]
ENSG00000166788	0.410741	-1.2837	9.30228e-24	9.41304e-23	yes	down	22.9	10.42	22.4	21.72	24.58	11.85	9.67	9.74	SAAL1	serum amyloid A like 1 [Source:HGNC Symbol;Acc:HGNC:25158]
ENSG00000141480	0.414419	-1.27084	1.13298e-23	1.14421e-22	yes	down	21.8733	10.4033	20.66	22.65	22.31	12.7	8.88	9.63	ARRB2	arrestin beta 2 [Source:HGNC Symbol;Acc:HGNC:712]
ENSG00000158406	5.44626	2.44526	1.14397e-23	1.15474e-22	yes	up	3.48	14.7833	5.24	2.26	2.94	15.89	16.23	12.23	HIST1H4H	histone cluster 1 H4 family member h [Source:HGNC Symbol;Acc:HGNC:4788]
ENSG00000149929	0.408292	-1.29233	1.48204e-23	1.49379e-22	yes	down	18.1433	7.20333	17.82	17.82	18.79	8.5	8.14	4.97	HIRIP3	HIRA interacting protein 3 [Source:HGNC Symbol;Acc:HGNC:4917]
ENSG00000232956	0.428897	-1.2213	1.57276e-23	1.58211e-22	yes	down	31.4033	13.8333	33.8	29.96	30.45	14.74	12.89	13.87	SNHG15	small nucleolar RNA host gene 15 [Source:HGNC Symbol;Acc:HGNC:27797]
ENSG00000204524	2.57302	1.36346	1.70505e-23	1.7135e-22	yes	up	1.41	2.92333	1.69	1.26	1.28	3.24	2.85	2.68	ZNF805	zinc finger protein 805 [Source:HGNC Symbol;Acc:HGNC:23272]
ENSG00000056972	2.78954	1.48003	1.75557e-23	1.76254e-22	yes	up	4.94333	11.5133	4.45	4.55	5.83	12.02	12.32	10.2	TRAF3IP2	TRAF3 interacting protein 2 [Source:HGNC Symbol;Acc:HGNC:1343]
ENSG00000005189	0.160631	-2.63817	2.17329e-23	2.17764e-22	yes	down	6.55333	1.50333	6.85	7.16	5.65	2.4	1.54	0.57	REXO5	RNA exonuclease 5 [Source:HGNC Symbol;Acc:HGNC:24661]
ENSG00000167528	2.64097	1.40107	2.91918e-23	2.91363e-22	yes	up	3.15667	6.61333	2	5.04	2.43	7.29	7.44	5.11	ZNF641	zinc finger protein 641 [Source:HGNC Symbol;Acc:HGNC:31834]
ENSG00000167702	2.03273	1.02342	3.08345e-23	3.0731e-22	yes	up	9.40667	19.9833	8.25	10.11	9.86	19.68	19.78	20.49	KIFC2	kinesin family member C2 [Source:HGNC Symbol;Acc:HGNC:29530]
ENSG00000256269	0.433838	-1.20477	3.13651e-23	3.12446e-22	yes	down	29.5067	11.6267	27.95	28.71	31.86	12.44	11.78	10.66	HMBS	hydroxymethylbilane synthase [Source:HGNC Symbol;Acc:HGNC:4982]
ENSG00000203760	0.282842	-1.82193	3.30791e-23	3.29359e-22	yes	down	35.1833	10.0533	35.41	33.19	36.95	10.67	11.2	8.29	CENPW	centromere protein W [Source:HGNC Symbol;Acc:HGNC:21488]
ENSG00000137168	0.475533	-1.07238	3.35228e-23	3.33453e-22	yes	down	38.5667	18.6633	42.1	35.56	38.04	19.43	20.36	16.2	PPIL1	peptidylprolyl isomerase like 1 [Source:HGNC Symbol;Acc:HGNC:9260]
ENSG00000112578	0.49392	-1.01765	3.36401e-23	3.34457e-22	yes	down	27.17	13.6067	27.7	27.69	26.12	13.23	13.86	13.73	BYSL	bystin like [Source:HGNC Symbol;Acc:HGNC:1157]
ENSG00000105676	0.447161	-1.16113	3.73113e-23	3.70777e-22	yes	down	22.7867	10.7367	26.74	19.97	21.65	9.8	10.46	11.95	ARMC6	armadillo repeat containing 6 [Source:HGNC Symbol;Acc:HGNC:25049]
ENSG00000090238	3.30714	1.72558	3.9979e-23	3.9671e-22	yes	up	10.21	37.5933	7.84	10.9	11.89	33.64	37.99	41.15	YPEL3	yippee like 3 [Source:HGNC Symbol;Acc:HGNC:18327]
ENSG00000261556	2.39382	1.25931	4.0822e-23	4.04879e-22	yes	up	4.32	10.0333	3.83	4.17	4.96	9.69	8.62	11.79	SMG1P7	SMG1 pseudogene 7 [Source:HGNC Symbol;Acc:HGNC:49864]
ENSG00000171388	0.147518	-2.76104	4.14975e-23	4.1138e-22	yes	down	3.07333	0.463333	3.4	2.68	3.14	0.57	0.48	0.34	APLN	apelin [Source:HGNC Symbol;Acc:HGNC:16665]
ENSG00000111906	0.474109	-1.07671	5.23511e-23	5.16227e-22	yes	down	56.1067	25.2367	58.45	54.32	55.55	23.87	27.03	24.81	HDDC2	HD domain containing 2 [Source:HGNC Symbol;Acc:HGNC:21078]
ENSG00000251369	2.18741	1.12922	8.4765e-23	8.29862e-22	yes	up	4.57	9.42333	4.47	4.95	4.29	8.48	9.66	10.13	ZNF550	zinc finger protein 550 [Source:HGNC Symbol;Acc:HGNC:28643]
ENSG00000137801	0.461011	-1.11713	8.7723e-23	8.58412e-22	yes	down	6.12667	2.35333	7.22	6.62	4.54	2.68	2.21	2.17	THBS1	thrombospondin 1 [Source:HGNC Symbol;Acc:HGNC:11785]
ENSG00000251201	2.1316	1.09194	1.61202e-22	1.56473e-21	yes	up	5.07667	11.2767	5.4	4.67	5.16	11.3	10.95	11.58	TMED7-TICAM2	TMED7-TICAM2 readthrough [Source:HGNC Symbol;Acc:HGNC:33945]
ENSG00000157470	0.227512	-2.13599	1.66433e-22	1.61398e-21	yes	down	4.58	0.976667	4.2	4.53	5.01	0.87	0.85	1.21	FAM81A	family with sequence similarity 81 member A [Source:HGNC Symbol;Acc:HGNC:28379]
ENSG00000172244	0.415245	-1.26797	2.32823e-22	2.24715e-21	yes	down	15.9367	6.56667	18.43	14.7	14.68	5.67	7.77	6.26	C5orf34	chromosome 5 open reading frame 34 [Source:HGNC Symbol;Acc:HGNC:24738]
ENSG00000239305	2.29903	1.20103	2.63038e-22	2.534e-21	yes	up	7.98667	15.3	6.68	8.41	8.87	14.46	14.61	16.83	RNF103	ring finger protein 103 [Source:HGNC Symbol;Acc:HGNC:12859]
ENSG00000254860	3.40159	1.76621	2.75489e-22	2.65021e-21	yes	up	2.39	8.33	2.27	2.7	2.2	7.67	9.32	8	TMEM9B-AS1	TMEM9B antisense RNA 1 [Source:HGNC Symbol;Acc:HGNC:19230]
ENSG00000156876	0.463876	-1.10819	2.83749e-22	2.72838e-21	yes	down	9.52667	4.47667	9.37	8.91	10.3	4.52	4.16	4.75	SASS6	SAS-6 centriolar assembly protein [Source:HGNC Symbol;Acc:HGNC:25403]
ENSG00000241399	0.324908	-1.6219	3.02124e-22	2.89827e-21	yes	down	5.60667	1.85333	5.11	6.74	4.97	1.91	1.87	1.78	CD302	CD302 molecule [Source:HGNC Symbol;Acc:HGNC:30843]
ENSG00000164796	3.24821	1.69965	3.5432e-22	3.3958e-21	yes	up	1.09	3.30667	1.27	1.01	0.99	3.52	3.16	3.24	CSMD3	CUB and Sushi multiple domains 3 [Source:HGNC Symbol;Acc:HGNC:19291]
ENSG00000189410	0.32455	-1.62349	3.93531e-22	3.76104e-21	yes	down	7.19	1.89667	8.08	6.59	6.9	1.8	1.92	1.97	SH2D5	SH2 domain containing 5 [Source:HGNC Symbol;Acc:HGNC:28819]
ENSG00000280385	2.43895	1.28626	4.08439e-22	3.89807e-21	yes	up	2.45667	6.11667	2.55	2.65	2.17	6.51	5.81	6.03	AP000648.3	novel transcript
ENSG00000161980	0.356937	-1.48626	4.63049e-22	4.40488e-21	yes	down	21.1567	7.74667	23.66	20.9	18.91	9.19	6.51	7.54	POLR3K	RNA polymerase III subunit K [Source:HGNC Symbol;Acc:HGNC:14121]
ENSG00000137124	0.473824	-1.07758	5.06626e-22	4.81718e-21	yes	down	13.34	6.44333	14.67	12.3	13.05	6.14	7.02	6.17	ALDH1B1	aldehyde dehydrogenase 1 family member B1 [Source:HGNC Symbol;Acc:HGNC:407]
ENSG00000175938	2.44473	1.28967	5.10704e-22	4.85371e-21	yes	up	6.70333	20.96	5.53	6.84	7.74	20.7	20.97	21.21	ORAI3	ORAI calcium release-activated calcium modulator 3 [Source:HGNC Symbol;Acc:HGNC:28185]
ENSG00000056558	12.4987	3.6437	5.18462e-22	4.92287e-21	yes	up	1.3	15.9267	1.55	0.74	1.61	14.28	16.19	17.31	TRAF1	TNF receptor associated factor 1 [Source:HGNC Symbol;Acc:HGNC:12031]
ENSG00000137959	6.07807	2.60361	6.14761e-22	5.82913e-21	yes	up	0.68	3.61	0.52	0.88	0.64	3.66	3.62	3.55	IFI44L	interferon induced protein 44 like [Source:HGNC Symbol;Acc:HGNC:17817]
ENSG00000180596	3.32228	1.73218	6.24546e-22	5.91917e-21	yes	up	13.7367	45.26	12.6	12.12	16.49	46.49	38.99	50.3	HIST1H2BC	histone cluster 1 H2B family member c [Source:HGNC Symbol;Acc:HGNC:4757]
ENSG00000123096	2.70535	1.43581	7.40533e-22	6.99256e-21	yes	up	2.96	7.70333	3.06	2.75	3.07	7.4	6.86	8.85	SSPN	sarcospan [Source:HGNC Symbol;Acc:HGNC:11322]
ENSG00000254901	0.310162	-1.6889	9.53503e-22	8.97871e-21	yes	down	18.68	5.74	19.31	18.76	17.97	5.61	6.28	5.33	BORCS8	BLOC-1 related complex subunit 8 [Source:HGNC Symbol;Acc:HGNC:37247]
ENSG00000163913	0.461525	-1.11552	1.04005e-21	9.78017e-21	yes	down	12.72	6.15667	14.59	12.33	11.24	7.22	5.09	6.16	IFT122	intraflagellar transport 122 [Source:HGNC Symbol;Acc:HGNC:13556]
ENSG00000173432	6.24091	2.64176	1.18221e-21	1.10864e-20	yes	up	5.67667	36.6833	4.51	8.23	4.29	35.36	36	38.69	SAA1	serum amyloid A1 [Source:HGNC Symbol;Acc:HGNC:10513]
ENSG00000143375	0.218622	-2.19349	1.24763e-21	1.16839e-20	yes	down	3.07333	0.803333	2.65	3.72	2.85	0.86	1.12	0.43	CGN	cingulin [Source:HGNC Symbol;Acc:HGNC:17429]
ENSG00000137700	0.460155	-1.11981	1.29508e-21	1.20951e-20	yes	down	16.1033	13.7467	16.22	17.85	14.24	7.37	8.29	25.58	SLC37A4	solute carrier family 37 member 4 [Source:HGNC Symbol;Acc:HGNC:4061]
ENSG00000225383	6.11255	2.61177	1.30096e-21	1.21444e-20	yes	up	4.19667	25.3933	4.05	4.88	3.66	24.3	22.61	29.27	SFTA1P	surfactant associated 1, pseudogene [Source:HGNC Symbol;Acc:HGNC:18383]
ENSG00000272734	2.18587	1.1282	1.5676e-21	1.4587e-20	yes	up	6.64667	13.6567	5.59	7.15	7.2	14.31	12.62	14.04	ADIRF-AS1	ADIRF antisense RNA 1 [Source:HGNC Symbol;Acc:HGNC:45127]
ENSG00000184162	0.360212	-1.47308	1.65992e-21	1.5418e-20	yes	down	20.95	7.71333	21.84	20.12	20.89	6.37	7.41	9.36	NR2C2AP	nuclear receptor 2C2 associated protein [Source:HGNC Symbol;Acc:HGNC:30763]
ENSG00000173083	0.286086	-1.80548	1.69201e-21	1.5709e-20	yes	down	4.37667	1.18333	4.38	4.91	3.84	1.11	1.15	1.29	HPSE	heparanase [Source:HGNC Symbol;Acc:HGNC:5164]
ENSG00000123095	2.70309	1.43461	1.96836e-21	1.82498e-20	yes	up	3.79667	10.26	2.58	5.35	3.46	9.98	10.89	9.91	BHLHE41	basic helix-loop-helix family member e41 [Source:HGNC Symbol;Acc:HGNC:16617]
ENSG00000106772	0.306583	-1.70565	2.01777e-21	1.86995e-20	yes	down	3.21333	0.72	2.64	2.62	4.38	0.68	0.86	0.62	PRUNE2	prune homolog 2 with BCH domain [Source:HGNC Symbol;Acc:HGNC:25209]
ENSG00000244165	4.68842	2.2291	2.18555e-21	2.02178e-20	yes	up	2.61	9.79667	2.21	2.6	3.02	10.09	10.95	8.35	P2RY11	purinergic receptor P2Y11 [Source:HGNC Symbol;Acc:HGNC:8540]
ENSG00000106404	3.64153	1.86455	2.54344e-21	2.34861e-20	yes	up	1.39	4.83333	1.27	1.11	1.79	4.82	4.11	5.57	CLDN15	claudin 15 [Source:HGNC Symbol;Acc:HGNC:2036]
ENSG00000104524	0.435744	-1.19845	2.60063e-21	2.40034e-20	yes	down	11.7133	5.12333	11.33	11.78	12.03	4.43	5.18	5.76	PYCR3	pyrroline-5-carboxylate reductase 3 [Source:HGNC Symbol;Acc:HGNC:25846]
ENSG00000185760	0.383057	-1.38437	2.75448e-21	2.54005e-20	yes	down	4.10333	1.9	4.13	4.43	3.75	1.81	2.16	1.73	KCNQ5	potassium voltage-gated channel subfamily Q member 5 [Source:HGNC Symbol;Acc:HGNC:6299]
ENSG00000134809	0.451206	-1.14814	2.81769e-21	2.596e-20	yes	down	72.4367	33.7967	76.14	70.6	70.57	34.15	34.4	32.84	TIMM10	translocase of inner mitochondrial membrane 10 [Source:HGNC Symbol;Acc:HGNC:11814]
ENSG00000073536	0.493433	-1.01907	3.14881e-21	2.89326e-20	yes	down	17.3467	7.36333	16.57	18.29	17.18	7.88	6.25	7.96	NLE1	notchless homolog 1 [Source:HGNC Symbol;Acc:HGNC:19889]
ENSG00000145911	2.71111	1.43888	3.24222e-21	2.97776e-20	yes	up	1.24333	3.43333	1.33	1.17	1.23	3.57	3.18	3.55	N4BP3	NEDD4 binding protein 3 [Source:HGNC Symbol;Acc:HGNC:29852]
ENSG00000165312	2.49969	1.32175	3.32328e-21	3.04947e-20	yes	up	3.71333	9.4	3.15	3.96	4.03	9.13	9.93	9.14	OTUD1	OTU deubiquitinase 1 [Source:HGNC Symbol;Acc:HGNC:27346]
ENSG00000137449	2.14363	1.10006	3.64703e-21	3.34205e-20	yes	up	3.28	6.56667	3.96	3.01	2.87	6.48	6.23	6.99	CPEB2	cytoplasmic polyadenylation element binding protein 2 [Source:HGNC Symbol;Acc:HGNC:21745]
ENSG00000095397	2.50518	1.32491	4.19827e-21	3.84203e-20	yes	up	3.25333	6.94667	2.89	3.75	3.12	7.1	7.38	6.36	WHRN	whirlin [Source:HGNC Symbol;Acc:HGNC:16361]
ENSG00000153029	2.16711	1.11577	4.59452e-21	4.20278e-20	yes	up	5.14	7.26333	5.03	5	5.39	7.42	6.35	8.02	MR1	major histocompatibility complex, class I-related [Source:HGNC Symbol;Acc:HGNC:4975]
ENSG00000235437	2.28284	1.19083	4.76804e-21	4.35956e-20	yes	up	9.45	19.67	10.97	9.93	7.45	20.93	17.76	20.32	LINC01278	long intergenic non-protein coding RNA 1278 [Source:HGNC Symbol;Acc:HGNC:28090]
ENSG00000196611	21.3999	4.41953	6.15023e-21	5.59835e-20	yes	up	0.16	3.48667	0.08	0.28	0.12	3.06	3.73	3.67	MMP1	matrix metallopeptidase 1 [Source:HGNC Symbol;Acc:HGNC:7155]
ENSG00000250786	2.85545	1.51372	6.66519e-21	6.05903e-20	yes	up	4.80667	13.99	4.57	4.81	5.04	13.27	12.9	15.8	SNHG18	small nucleolar RNA host gene 18 [Source:HGNC Symbol;Acc:HGNC:49007]
ENSG00000186767	0.461279	-1.11629	8.35826e-21	7.57123e-20	yes	down	9.12667	4.28	9.12	8.61	9.65	4.75	3.62	4.47	SPIN4	spindlin family member 4 [Source:HGNC Symbol;Acc:HGNC:27040]
ENSG00000250571	2.00302	1.00218	9.44969e-21	8.541e-20	yes	up	11.0467	21.8167	10.27	11.35	11.52	19.83	22.62	23	GLI4	GLI family zinc finger 4 [Source:HGNC Symbol;Acc:HGNC:4320]
ENSG00000185507	2.54752	1.34909	1.04544e-20	9.43659e-20	yes	up	6.37667	16.1933	6.53	6.79	5.81	17.7	14	16.88	IRF7	interferon regulatory factor 7 [Source:HGNC Symbol;Acc:HGNC:6122]
ENSG00000119714	2.54395	1.34707	1.07805e-20	9.72666e-20	yes	up	3.00333	8.29	3	3.44	2.57	8.64	8.86	7.37	GPR68	G protein-coupled receptor 68 [Source:HGNC Symbol;Acc:HGNC:4519]
ENSG00000068971	2.19507	1.13427	1.21245e-20	1.09296e-19	yes	up	6.09667	12.6367	6.53	6.84	4.92	12.59	12.33	12.99	PPP2R5B	protein phosphatase 2 regulatory subunit B'beta [Source:HGNC Symbol;Acc:HGNC:9310]
ENSG00000254887	6.45611	2.69066	1.44372e-20	1.29744e-19	yes	up	2.02333	9.29333	2.63	1.42	2.02	8.49	10.43	8.96	AC010247.1	novel transcript, antisense to POU2F2
ENSG00000233822	4.75753	2.25021	1.57215e-20	1.41101e-19	yes	up	1.41333	3.55333	2.02	0.65	1.57	3.37	3.39	3.9	HIST1H2BN	histone cluster 1 H2B family member n [Source:HGNC Symbol;Acc:HGNC:4749]
ENSG00000044459	0.391411	-1.35324	1.57631e-20	1.41412e-19	yes	down	6.17	1.98667	5.87	5	7.64	2.24	1.93	1.79	CNTLN	centlein [Source:HGNC Symbol;Acc:HGNC:23432]
ENSG00000111788	0.411593	-1.28071	2.22023e-20	1.98484e-19	yes	down	6.7	2.77	7.3	6.58	6.22	2.85	2.7	2.76	AC009533.1	DEAD/H (Asp-Glu-Ala-Asp/His) box polypeptide like pseudogene
ENSG00000156398	0.200105	-2.32117	2.68373e-20	2.39084e-19	yes	down	7.01333	0.863333	9.42	6.44	5.18	0.9	0.74	0.95	SFXN2	sideroflexin 2 [Source:HGNC Symbol;Acc:HGNC:16086]
ENSG00000204856	0.447511	-1.16	3.44562e-20	3.05101e-19	yes	down	31.9767	13.8067	33.99	28.89	33.05	14.3	14.1	13.02	FAM216A	family with sequence similarity 216 member A [Source:HGNC Symbol;Acc:HGNC:30180]
ENSG00000164684	0.262738	-1.9283	3.51957e-20	3.11245e-19	yes	down	0.946667	0.226667	0.86	0.88	1.1	0.22	0.2	0.26	ZNF704	zinc finger protein 704 [Source:HGNC Symbol;Acc:HGNC:32291]
ENSG00000185640	5.73156	2.51893	3.57068e-20	3.15628e-19	yes	up	1.04333	6.20667	0.77	1.18	1.18	5.55	5.79	7.28	KRT79	keratin 79 [Source:HGNC Symbol;Acc:HGNC:28930]
ENSG00000141994	0.446136	-1.16444	4.03684e-20	3.55913e-19	yes	down	21.9633	10.0333	21.98	22.96	20.95	12.59	8.49	9.02	DUS3L	dihydrouridine synthase 3 like [Source:HGNC Symbol;Acc:HGNC:26920]
ENSG00000161618	0.457111	-1.12938	4.45845e-20	3.9224e-19	yes	down	12.57	6.99667	13.69	13.25	10.77	6.11	8.51	6.37	ALDH16A1	aldehyde dehydrogenase 16 family member A1 [Source:HGNC Symbol;Acc:HGNC:28114]
ENSG00000273802	4.50678	2.1721	4.78135e-20	4.20287e-19	yes	up	1.37667	5.93	1.38	1.43	1.32	5.34	6.58	5.87	HIST1H2BG	histone cluster 1 H2B family member g [Source:HGNC Symbol;Acc:HGNC:4746]
ENSG00000179886	2.12702	1.08884	5.65805e-20	4.95013e-19	yes	up	2.72333	5.90333	2.96	2.77	2.44	5.93	5.76	6.02	TIGD5	tigger transposable element derived 5 [Source:HGNC Symbol;Acc:HGNC:18336]
ENSG00000263513	0.149301	-2.74371	5.92983e-20	5.18126e-19	yes	down	4.82	0.726667	3.59	5.06	5.81	0.7	1	0.48	FAM72C	family with sequence similarity 72 member C [Source:HGNC Symbol;Acc:HGNC:30602]
ENSG00000114771	2.12973	1.09067	6.45603e-20	5.62664e-19	yes	up	6.56667	13.6033	8.09	5.43	6.18	12.66	13.4	14.75	AADAC	arylacetamide deacetylase [Source:HGNC Symbol;Acc:HGNC:17]
ENSG00000274750	4.41768	2.14329	8.65252e-20	7.52494e-19	yes	up	1.04667	4.83	1.03	0.97	1.14	4.07	4.64	5.78	HIST1H3E	histone cluster 1 H3 family member e [Source:HGNC Symbol;Acc:HGNC:4769]
ENSG00000259431	2.18161	1.1254	9.30339e-20	8.08412e-19	yes	up	6.43667	14.6933	6.19	6.97	6.15	15.99	13.35	14.74	THTPA	thiamine triphosphatase [Source:HGNC Symbol;Acc:HGNC:18987]
ENSG00000197020	0.312113	-1.67986	9.39e-20	8.15592e-19	yes	down	4.28	1.40333	4.62	4.36	3.86	1.23	1.09	1.89	ZNF100	zinc finger protein 100 [Source:HGNC Symbol;Acc:HGNC:12880]
ENSG00000179241	0.497917	-1.00602	1.00424e-19	8.71884e-19	yes	down	10.51	5.57	10.09	10.17	11.27	5.28	6.5	4.93	LDLRAD3	low density lipoprotein receptor class A domain containing 3 [Source:HGNC Symbol;Acc:HGNC:27046]
ENSG00000264112	2.46909	1.30398	1.016e-19	8.81723e-19	yes	up	3.16667	7.71	2.83	3.06	3.61	7.16	8.21	7.76	AC015813.1	novel transcript
ENSG00000178538	3.81919	1.93327	1.02576e-19	8.89816e-19	yes	up	0.883333	3.03333	0.97	0.89	0.79	3.19	2.63	3.28	CA8	carbonic anhydrase 8 [Source:HGNC Symbol;Acc:HGNC:1382]
ENSG00000139998	0.479077	-1.06167	1.03686e-19	8.97944e-19	yes	down	10.7533	5.47667	11.02	10.9	10.34	4.65	6.05	5.73	RAB15	RAB15, member RAS oncogene family [Source:HGNC Symbol;Acc:HGNC:20150]
ENSG00000187068	0.227368	-2.1369	1.05727e-19	9.15212e-19	yes	down	1.52	0.346667	1.79	1.41	1.36	0.32	0.35	0.37	C3orf70	chromosome 3 open reading frame 70 [Source:HGNC Symbol;Acc:HGNC:33731]
ENSG00000261618	4.52544	2.17806	1.2185e-19	1.053e-18	yes	up	0.413333	1.92	0.45	0.38	0.41	2.05	1.88	1.83	LINC02605	long intergenic non-protein coding RNA 2605 [Source:HGNC Symbol;Acc:HGNC:53974]
ENSG00000157823	2.18579	1.12815	1.46892e-19	1.2662e-18	yes	up	17.67	19.7567	20.04	16.47	16.5	18.35	21.13	19.79	AP3S2	adaptor related protein complex 3 subunit sigma 2 [Source:HGNC Symbol;Acc:HGNC:571]
ENSG00000175287	0.337781	-1.56584	1.5521e-19	1.33734e-18	yes	down	19.41	6.69667	20.13	16.91	21.19	6.81	7.53	5.75	PHYHD1	phytanoyl-CoA dioxygenase domain containing 1 [Source:HGNC Symbol;Acc:HGNC:23396]
ENSG00000164331	2.00109	1.00079	2.18849e-19	1.87385e-18	yes	up	11.0733	21.6533	10.04	11.14	12.04	23.2	21.74	20.02	ANKRA2	ankyrin repeat family A member 2 [Source:HGNC Symbol;Acc:HGNC:13208]
ENSG00000050730	4.00102	2.00037	2.38341e-19	2.03649e-18	yes	up	1.82	6.32	2.19	1.3	1.97	6.59	6.46	5.91	TNIP3	TNFAIP3 interacting protein 3 [Source:HGNC Symbol;Acc:HGNC:19315]
ENSG00000134245	3.48792	1.80237	2.53958e-19	2.16631e-18	yes	up	0.746667	2.65667	0.82	0.73	0.69	2.87	2.22	2.88	WNT2B	Wnt family member 2B [Source:HGNC Symbol;Acc:HGNC:12781]
ENSG00000128394	3.76107	1.91114	2.53901e-19	2.16631e-18	yes	up	2.61667	5.42667	2.53	2.88	2.44	6.12	4.75	5.41	APOBEC3F	apolipoprotein B mRNA editing enzyme catalytic subunit 3F [Source:HGNC Symbol;Acc:HGNC:17356]
ENSG00000169126	0.31917	-1.6476	2.80974e-19	2.39079e-18	yes	down	4.79	1.97	4.49	4.3	5.58	2.19	2.15	1.57	ARMC4	armadillo repeat containing 4 [Source:HGNC Symbol;Acc:HGNC:25583]
ENSG00000100979	0.479691	-1.05982	3.00946e-19	2.5586e-18	yes	down	17.9633	8.89	17.71	18.63	17.55	9.23	8.57	8.87	PLTP	phospholipid transfer protein [Source:HGNC Symbol;Acc:HGNC:9093]
ENSG00000109576	0.297666	-1.74823	3.12019e-19	2.65054e-18	yes	down	5.35667	1.91333	6.22	4.89	4.96	2.03	1.53	2.18	AADAT	aminoadipate aminotransferase [Source:HGNC Symbol;Acc:HGNC:17929]
ENSG00000137656	0.498768	-1.00356	3.25474e-19	2.75912e-18	yes	down	18.9433	9.61667	20.67	18.87	17.29	9.69	10.29	8.87	BUD13	BUD13 homolog [Source:HGNC Symbol;Acc:HGNC:28199]
ENSG00000168209	2.37474	1.24777	4.16594e-19	3.51556e-18	yes	up	106.827	254.96	85.68	120.14	114.66	260.13	261.23	243.52	DDIT4	DNA damage inducible transcript 4 [Source:HGNC Symbol;Acc:HGNC:24944]
ENSG00000107614	0.492211	-1.02265	5.3701e-19	4.50205e-18	yes	down	14.41	6.34333	13.37	13.78	16.08	6.4	4.58	8.05	TRDMT1	tRNA aspartic acid methyltransferase 1 [Source:HGNC Symbol;Acc:HGNC:2977]
ENSG00000198771	12.119	3.5992	5.54861e-19	4.6422e-18	yes	up	0.213333	1.97	0.09	0.29	0.26	1.84	1.7	2.37	RCSD1	RCSD domain containing 1 [Source:HGNC Symbol;Acc:HGNC:28310]
ENSG00000258183	74.3465	6.21619	5.71131e-19	4.77637e-18	yes	up	0.08	8.56667	0.12	0.12	0	8.49	8.59	8.62	LINC02392	long intergenic non-protein coding RNA 2392 [Source:HGNC Symbol;Acc:HGNC:53319]
ENSG00000152463	26.353	4.7199	5.90144e-19	4.93336e-18	yes	up	0.186667	4.12	0.1	0.26	0.2	3.8	4.07	4.49	OLAH	oleoyl-ACP hydrolase [Source:HGNC Symbol;Acc:HGNC:25625]
ENSG00000143878	2.04561	1.03253	6.476e-19	5.38947e-18	yes	up	9.04667	18.7433	7.55	9.63	9.96	19.91	18.18	18.14	RHOB	ras homolog family member B [Source:HGNC Symbol;Acc:HGNC:668]
ENSG00000154589	3.11157	1.63764	7.44495e-19	6.17829e-18	yes	up	15.1167	45.2267	12.68	14.93	17.74	39.53	46.8	49.35	LY96	lymphocyte antigen 96 [Source:HGNC Symbol;Acc:HGNC:17156]
ENSG00000148459	0.331384	-1.59343	8.72287e-19	7.18926e-18	yes	down	13.57	4.58	14	12.55	14.16	4.21	5.61	3.92	PDSS1	decaprenyl diphosphate synthase subunit 1 [Source:HGNC Symbol;Acc:HGNC:17759]
ENSG00000196247	0.469705	-1.09017	9.87429e-19	8.1219e-18	yes	down	5.57333	2.70333	5.78	5.4	5.54	2.29	3.02	2.8	ZNF107	zinc finger protein 107 [Source:HGNC Symbol;Acc:HGNC:12887]
ENSG00000144355	0.389455	-1.36047	1.11435e-18	9.13652e-18	yes	down	13.46	5.53667	13.84	13.26	13.28	6.54	5.29	4.78	DLX1	distal-less homeobox 1 [Source:HGNC Symbol;Acc:HGNC:2914]
ENSG00000162390	0.254514	-1.97419	1.17035e-18	9.58412e-18	yes	down	4.03333	0.943333	4.37	4.21	3.52	1.08	0.8	0.95	ACOT11	acyl-CoA thioesterase 11 [Source:HGNC Symbol;Acc:HGNC:18156]
ENSG00000136943	0.220876	-2.17869	1.28816e-18	1.05279e-17	yes	down	2.45667	0.68	2.9	2.1	2.37	0.49	1.06	0.49	CTSV	cathepsin V [Source:HGNC Symbol;Acc:HGNC:2538]
ENSG00000196967	2.11541	1.08094	1.34205e-18	1.09552e-17	yes	up	10.2667	24.03	9.08	10.08	11.64	22.37	25.79	23.93	ZNF585A	zinc finger protein 585A [Source:HGNC Symbol;Acc:HGNC:26305]
ENSG00000205560	3.31275	1.72803	1.39203e-18	1.13586e-17	yes	up	3.16667	11.1367	3.63	2.7	3.17	7.21	10.84	15.36	CPT1B	carnitine palmitoyltransferase 1B [Source:HGNC Symbol;Acc:HGNC:2329]
ENSG00000127423	0.218993	-2.19104	1.41862e-18	1.1571e-17	yes	down	6.94333	1.45333	6.57	6.22	8.04	1.93	0.89	1.54	AUNIP	aurora kinase A and ninein interacting protein [Source:HGNC Symbol;Acc:HGNC:28363]
ENSG00000127946	0.469907	-1.08955	1.46683e-18	1.19499e-17	yes	down	3.54333	2.13667	3.61	3.43	3.59	2.48	2.03	1.9	HIP1	huntingtin interacting protein 1 [Source:HGNC Symbol;Acc:HGNC:4913]
ENSG00000158270	0.247707	-2.01329	1.47274e-18	1.19933e-17	yes	down	2.33667	0.586667	1.76	2.37	2.88	0.61	0.62	0.53	COLEC12	collectin subfamily member 12 [Source:HGNC Symbol;Acc:HGNC:16016]
ENSG00000149809	2.2192	1.15004	1.58592e-18	1.28945e-17	yes	up	10.87	23.4667	11.77	9.92	10.92	21.43	24.01	24.96	TM7SF2	transmembrane 7 superfamily member 2 [Source:HGNC Symbol;Acc:HGNC:11863]
ENSG00000086544	2.22182	1.15174	1.77983e-18	1.4431e-17	yes	up	3.6	8.01	3.79	3.51	3.5	8.2	7.43	8.4	ITPKC	inositol-trisphosphate 3-kinase C [Source:HGNC Symbol;Acc:HGNC:14897]
ENSG00000134575	0.438469	-1.18945	2.11438e-18	1.70827e-17	yes	down	13.4367	6.09	13.27	12.71	14.33	6.29	5.51	6.47	ACP2	acid phosphatase 2, lysosomal [Source:HGNC Symbol;Acc:HGNC:123]
ENSG00000204388	2.55934	1.35577	2.6463e-18	2.13214e-17	yes	up	49.2767	127.443	66.3	46	35.53	110.9	130.12	141.31	HSPA1B	heat shock protein family A (Hsp70) member 1B [Source:HGNC Symbol;Acc:HGNC:5233]
ENSG00000106034	0.433051	-1.20739	3.19314e-18	2.56566e-17	yes	down	6.23333	2.7	5.33	6.36	7.01	3.29	2.25	2.56	CPED1	cadherin like and PC-esterase domain containing 1 [Source:HGNC Symbol;Acc:HGNC:26159]
ENSG00000258839	3.07273	1.61952	3.28243e-18	2.63637e-17	yes	up	1.67667	5.33	1.47	1.54	2.02	5.45	5.11	5.43	MC1R	melanocortin 1 receptor [Source:HGNC Symbol;Acc:HGNC:6929]
ENSG00000101335	0.30896	-1.69451	3.34858e-18	2.68529e-17	yes	down	9.71333	2.79333	9.63	9.36	10.15	3.08	2.1	3.2	MYL9	myosin light chain 9 [Source:HGNC Symbol;Acc:HGNC:15754]
ENSG00000170085	0.469322	-1.09135	3.52443e-18	2.82299e-17	yes	down	9.91	4.83333	9.14	9.72	10.87	4.68	4.2	5.62	SIMC1	SUMO interacting motifs containing 1 [Source:HGNC Symbol;Acc:HGNC:24779]
ENSG00000120278	2.1913	1.13179	3.73121e-18	2.98395e-17	yes	up	1.89667	3.86333	2.03	1.92	1.74	3.35	3.52	4.72	PLEKHG1	pleckstrin homology and RhoGEF domain containing G1 [Source:HGNC Symbol;Acc:HGNC:20884]
ENSG00000258791	5.31523	2.41013	3.96187e-18	3.16594e-17	yes	up	5.76667	22.9967	5.53	4.71	7.06	24.73	21.99	22.27	LINC00520	long intergenic non-protein coding RNA 520 [Source:HGNC Symbol;Acc:HGNC:19843]
ENSG00000204611	2.08581	1.06061	4.55626e-18	3.63525e-17	yes	up	3.62	8.87333	3.3	3.76	3.8	10.17	8.05	8.4	ZNF616	zinc finger protein 616 [Source:HGNC Symbol;Acc:HGNC:28062]
ENSG00000160781	5.46028	2.44898	5.68934e-18	4.51816e-17	yes	up	0.923333	5.33	0.74	1.11	0.92	4.2	5.46	6.33	PAQR6	progestin and adipoQ receptor family member 6 [Source:HGNC Symbol;Acc:HGNC:30132]
ENSG00000188215	2.01294	1.00931	5.79027e-18	4.59654e-17	yes	up	3.40667	5.84667	3.47	2.45	4.3	5.63	5.88	6.03	DCUN1D3	defective in cullin neddylation 1 domain containing 3 [Source:HGNC Symbol;Acc:HGNC:28734]
ENSG00000257365	0.466831	-1.09903	6.68391e-18	5.2933e-17	yes	down	12.16	6.72	13.91	11.73	10.84	6.35	7.88	5.93	FNTB	farnesyltransferase, CAAX box, beta [Source:HGNC Symbol;Acc:HGNC:3785]
ENSG00000064692	0.144748	-2.78838	6.84937e-18	5.41838e-17	yes	down	2.87	0.6	3.54	2.32	2.75	0.54	0.42	0.84	SNCAIP	synuclein alpha interacting protein [Source:HGNC Symbol;Acc:HGNC:11139]
ENSG00000075826	2.38127	1.25173	7.3415e-18	5.79427e-17	yes	up	3.06	6.31333	3.38	2.81	2.99	6.32	5.57	7.05	SEC31B	SEC31 homolog B, COPII coat complex component [Source:HGNC Symbol;Acc:HGNC:23197]
ENSG00000216775	0.386534	-1.37133	7.54609e-18	5.95345e-17	yes	down	5.23	2.06	5.07	5.71	4.91	1.91	2.17	2.1	AL109918.1	heterogeneous nuclear ribonucleoprotein A/B (HNRNPAB) pseudogene
ENSG00000167889	0.343628	-1.54108	8.79112e-18	6.92238e-17	yes	down	4.83333	1.83667	5.52	4.22	4.76	1.7	1.92	1.89	MGAT5B	alpha-1,6-mannosylglycoprotein 6-beta-N-acetylglucosaminyltransferase B [Source:HGNC Symbol;Acc:HGNC:24140]
ENSG00000146555	0.493261	-1.01958	9.49561e-18	7.4685e-17	yes	down	3.76333	1.61667	3.15	3.84	4.3	1.61	1.72	1.52	SDK1	sidekick cell adhesion molecule 1 [Source:HGNC Symbol;Acc:HGNC:19307]
ENSG00000196358	6.06217	2.59983	9.51868e-18	7.48377e-17	yes	up	0.593333	3.49333	0.5	0.53	0.75	3.2	2.59	4.69	NTNG2	netrin G2 [Source:HGNC Symbol;Acc:HGNC:14288]
ENSG00000126249	0.340224	-1.55544	1.01602e-17	7.96982e-17	yes	down	16.07	6.05	16.38	15.36	16.47	6.89	5.83	5.43	PDCD2L	programmed cell death 2 like [Source:HGNC Symbol;Acc:HGNC:28194]
ENSG00000172197	0.330261	-1.59832	1.1062e-17	8.65728e-17	yes	down	4.81667	1.61	5.06	4.9	4.49	1.7	1.7	1.43	MBOAT1	membrane bound O-acyltransferase domain containing 1 [Source:HGNC Symbol;Acc:HGNC:21579]
ENSG00000198053	0.493882	-1.01776	1.1756e-17	9.19339e-17	yes	down	9.19	4.54	8.78	10.19	8.6	5.06	4.33	4.23	SIRPA	signal regulatory protein alpha [Source:HGNC Symbol;Acc:HGNC:9662]
ENSG00000264343	0.372091	-1.42627	1.79116e-17	1.3901e-16	yes	down	14.97	7.81333	13.21	16.28	15.42	11.5	7.35	4.59	NOTCH2NLA	notch 2 N-terminal like A [Source:HGNC Symbol;Acc:HGNC:31862]
ENSG00000075131	0.388577	-1.36373	1.80618e-17	1.40123e-16	yes	down	19.0467	8.60667	18.66	20.59	17.89	6.92	8.66	10.24	TIPIN	TIMELESS interacting protein [Source:HGNC Symbol;Acc:HGNC:30750]
ENSG00000223745	2.1358	1.09478	2.00551e-17	1.55469e-16	yes	up	5.22333	10.46	6.46	5.06	4.15	9.03	11.82	10.53	CCDC18-AS1	CCDC18 antisense RNA 1 [Source:HGNC Symbol;Acc:HGNC:52262]
ENSG00000240065	2.17113	1.11845	2.09141e-17	1.61944e-16	yes	up	14.8967	32.6333	15.56	14.27	14.86	30.56	33.09	34.25	PSMB9	proteasome subunit beta 9 [Source:HGNC Symbol;Acc:HGNC:9546]
ENSG00000164002	0.468638	-1.09346	2.19314e-17	1.69757e-16	yes	down	19.4667	9.81667	19.27	21.01	18.12	8.98	11.66	8.81	EXO5	exonuclease 5 [Source:HGNC Symbol;Acc:HGNC:26115]
ENSG00000131652	0.382068	-1.3881	2.36769e-17	1.83198e-16	yes	down	17.51	6.96333	15.76	19.96	16.81	5.88	5.77	9.24	THOC6	THO complex 6 [Source:HGNC Symbol;Acc:HGNC:28369]
ENSG00000135951	2.6398	1.40043	2.49082e-17	1.9258e-16	yes	up	5.07333	11.84	4.58	5.34	5.3	11.92	12.6	11	TSGA10	testis specific 10 [Source:HGNC Symbol;Acc:HGNC:14927]
ENSG00000277639	7.49205	2.90536	2.74153e-17	2.11565e-16	yes	up	0.926667	7.15667	0.88	1.58	0.32	6.53	8.52	6.42	AC007906.2	novel protein
ENSG00000226859	91.2248	6.51135	2.8275e-17	2.17953e-16	yes	up	0.163333	16.1	0.23	0.26	0	15.13	16.35	16.82	LINC02051	long intergenic non-protein coding RNA 2051 [Source:HGNC Symbol;Acc:HGNC:52891]
ENSG00000185561	2.62329	1.39138	3.4329e-17	2.63528e-16	yes	up	1.45333	3.80333	1.31	1.79	1.26	4.14	4.05	3.22	TLCD2	TLC domain containing 2 [Source:HGNC Symbol;Acc:HGNC:33522]
ENSG00000130413	0.378521	-1.40155	4.21455e-17	3.22323e-16	yes	down	9.03667	3.82	7.62	9.81	9.68	4.31	2.83	4.32	STK33	serine/threonine kinase 33 [Source:HGNC Symbol;Acc:HGNC:14568]
ENSG00000168389	2.29282	1.19712	4.49211e-17	3.43423e-16	yes	up	4.98333	12.3267	5.07	4.91	4.97	13.58	11.74	11.66	MFSD2A	major facilitator superfamily domain containing 2A [Source:HGNC Symbol;Acc:HGNC:25897]
ENSG00000004660	0.341272	-1.551	4.94056e-17	3.76862e-16	yes	down	4.2	1.48	4	4.27	4.33	1.69	1.32	1.43	CAMKK1	calcium/calmodulin dependent protein kinase kinase 1 [Source:HGNC Symbol;Acc:HGNC:1469]
ENSG00000165617	4.16384	2.05791	5.2198e-17	3.97571e-16	yes	up	0.74	2.94333	0.59	0.95	0.68	3.1	3.08	2.65	DACT1	dishevelled binding antagonist of beta catenin 1 [Source:HGNC Symbol;Acc:HGNC:17748]
ENSG00000129354	0.338578	-1.56244	5.71048e-17	4.34298e-16	yes	down	14.6833	5.47667	15.66	14.06	14.33	4.98	5.59	5.86	AP1M2	adaptor related protein complex 1 subunit mu 2 [Source:HGNC Symbol;Acc:HGNC:558]
ENSG00000273230	4.52159	2.17683	7.10026e-17	5.38195e-16	yes	up	0.703333	3.28333	0.82	0.84	0.45	3.08	3.2	3.57	AC102953.2	novel transcript
ENSG00000269867	2.90655	1.53931	7.31994e-17	5.54641e-16	yes	up	1.45333	4.31333	1.53	1.5	1.33	4.06	4.36	4.52	AC010326.3	novel transcript, sense intronic to ZNF814
ENSG00000262580	4.44998	2.1538	7.32914e-17	5.55133e-16	yes	up	1.34	6.62333	1.57	1.16	1.29	4.72	7.28	7.87	AC087741.1	novel transcript, antisense to CARD14
ENSG00000157657	0.448639	-1.15637	7.81139e-17	5.90787e-16	yes	down	3.55333	1.54667	3.22	4.17	3.27	1.7	1.42	1.52	ZNF618	zinc finger protein 618 [Source:HGNC Symbol;Acc:HGNC:29416]
ENSG00000170634	2.38538	1.25422	7.95873e-17	6.01486e-16	yes	up	9.95333	22.3533	11.03	8.91	9.92	21.84	23.07	22.15	ACYP2	acylphosphatase 2 [Source:HGNC Symbol;Acc:HGNC:180]
ENSG00000110002	3.32278	1.73239	1.05465e-16	7.92381e-16	yes	up	1.85667	6.49	1.43	2.28	1.86	5.69	6.95	6.83	VWA5A	von Willebrand factor A domain containing 5A [Source:HGNC Symbol;Acc:HGNC:6658]
ENSG00000136531	3.16181	1.66075	1.09071e-16	8.19171e-16	yes	up	0.586667	1.68333	0.49	0.57	0.7	1.48	1.8	1.77	SCN2A	sodium voltage-gated channel alpha subunit 2 [Source:HGNC Symbol;Acc:HGNC:10588]
ENSG00000125319	0.334421	-1.58026	1.13902e-16	8.53891e-16	yes	down	6.98667	2.84	8.88	6.11	5.97	3.07	3	2.45	C17orf53	chromosome 17 open reading frame 53 [Source:HGNC Symbol;Acc:HGNC:28460]
ENSG00000183814	0.428849	-1.22146	1.15663e-16	8.66459e-16	yes	down	7.10667	3.07667	7.26	6.26	7.8	3.01	3.36	2.86	LIN9	lin-9 DREAM MuvB core complex component [Source:HGNC Symbol;Acc:HGNC:30830]
ENSG00000108846	2.31709	1.21231	1.15796e-16	8.6714e-16	yes	up	4.08667	9.43667	6.18	2.47	3.61	8.2	11.1	9.01	ABCC3	ATP binding cassette subfamily C member 3 [Source:HGNC Symbol;Acc:HGNC:54]
ENSG00000174370	0.41496	-1.26895	1.21013e-16	9.05543e-16	yes	down	9.82333	3.92333	10.75	9.69	9.03	3.48	4.53	3.76	C11orf45	chromosome 11 open reading frame 45 [Source:HGNC Symbol;Acc:HGNC:28584]
ENSG00000128833	0.280946	-1.83163	1.22713e-16	9.17929e-16	yes	down	1.68333	0.503333	1.44	1.77	1.84	0.52	0.43	0.56	MYO5C	myosin VC [Source:HGNC Symbol;Acc:HGNC:7604]
ENSG00000006042	0.442685	-1.17565	1.28883e-16	9.62676e-16	yes	down	18.98	8.65667	18.95	18.82	19.17	8.04	10.54	7.39	TMEM98	transmembrane protein 98 [Source:HGNC Symbol;Acc:HGNC:24529]
ENSG00000151150	0.434933	-1.20113	1.49533e-16	1.1157e-15	yes	down	5.27333	2.70667	4.87	5.48	5.47	2.76	3.13	2.23	ANK3	ankyrin 3 [Source:HGNC Symbol;Acc:HGNC:494]
ENSG00000164099	0.488926	-1.03231	1.56268e-16	1.1651e-15	yes	down	8.04	4.00333	6.95	9.94	7.23	3.57	4.14	4.3	PRSS12	serine protease 12 [Source:HGNC Symbol;Acc:HGNC:9477]
ENSG00000183605	0.493397	-1.01918	1.56262e-16	1.1651e-15	yes	down	25.7433	13.04	27.04	23.75	26.44	12.68	13.94	12.5	SFXN4	sideroflexin 4 [Source:HGNC Symbol;Acc:HGNC:16088]
ENSG00000099992	2.11452	1.08033	1.59973e-16	1.19229e-15	yes	up	8.44667	19.78	7.18	9.2	8.96	21.26	15.93	22.15	TBC1D10A	TBC1 domain family member 10A [Source:HGNC Symbol;Acc:HGNC:23609]
ENSG00000212724	0.128865	-2.95607	1.65659e-16	1.23377e-15	yes	down	14.6533	1.88	14.56	17	12.4	0.82	2.57	2.25	KRTAP2-3	keratin associated protein 2-3 [Source:HGNC Symbol;Acc:HGNC:18906]
ENSG00000101220	0.449052	-1.15505	1.73132e-16	1.28849e-15	yes	down	16.7167	8.10667	17.77	15.64	16.74	8.79	7.01	8.52	C20orf27	chromosome 20 open reading frame 27 [Source:HGNC Symbol;Acc:HGNC:15873]
ENSG00000005249	0.415251	-1.26795	1.74603e-16	1.29896e-15	yes	down	5.84	2.45333	5.17	5.79	6.56	2.3	2.6	2.46	PRKAR2B	protein kinase cAMP-dependent type II regulatory subunit beta [Source:HGNC Symbol;Acc:HGNC:9392]
ENSG00000184005	0.386086	-1.37301	1.81016e-16	1.34619e-15	yes	down	4.08667	1.5	4.11	4.83	3.32	1.35	1.98	1.17	ST6GALNAC3	ST6 N-acetylgalactosaminide alpha-2,6-sialyltransferase 3 [Source:HGNC Symbol;Acc:HGNC:19343]
ENSG00000150347	2.16214	1.11246	2.04855e-16	1.51796e-15	yes	up	1.89333	3.97333	1.71	2.23	1.74	3.52	4.19	4.21	ARID5B	AT-rich interaction domain 5B [Source:HGNC Symbol;Acc:HGNC:17362]
ENSG00000105711	0.488693	-1.033	2.09096e-16	1.54771e-15	yes	down	18.8333	8.73667	20.19	17.61	18.7	8.63	9.51	8.07	SCN1B	sodium voltage-gated channel beta subunit 1 [Source:HGNC Symbol;Acc:HGNC:10586]
ENSG00000069399	2.73712	1.45266	2.53019e-16	1.86809e-15	yes	up	5.53667	13.2833	5.19	6.84	4.58	13.68	15.16	11.01	BCL3	BCL3, transcription coactivator [Source:HGNC Symbol;Acc:HGNC:998]
ENSG00000079462	0.437881	-1.19139	2.5479e-16	1.88048e-15	yes	down	33.88	14.1333	29.07	31.59	40.98	14.55	13.77	14.08	PAFAH1B3	platelet activating factor acetylhydrolase 1b catalytic subunit 3 [Source:HGNC Symbol;Acc:HGNC:8576]
ENSG00000184785	0.293384	-1.76914	2.80045e-16	2.06317e-15	yes	down	8.96	2.67	9.32	7.74	9.82	2.51	2.76	2.74	SMIM10	small integral membrane protein 10 [Source:HGNC Symbol;Acc:HGNC:41913]
ENSG00000177576	2.14552	1.10133	3.53239e-16	2.59122e-15	yes	up	13.1767	29.4333	10.67	12.74	16.12	29.32	30.07	28.91	C18orf32	chromosome 18 open reading frame 32 [Source:HGNC Symbol;Acc:HGNC:31690]
ENSG00000003137	0.485101	-1.04364	4.02993e-16	2.9467e-15	yes	down	9.8	4.15333	10.63	10.92	7.85	4.68	4.1	3.68	CYP26B1	cytochrome P450 family 26 subfamily B member 1 [Source:HGNC Symbol;Acc:HGNC:20581]
ENSG00000093217	0.363604	-1.45956	4.36852e-16	3.18972e-15	yes	down	7.26333	2.74667	8.33	6.61	6.85	2.35	2.2	3.69	XYLB	xylulokinase [Source:HGNC Symbol;Acc:HGNC:12839]
ENSG00000153982	2.42706	1.27921	4.6453e-16	3.38698e-15	yes	up	3.94	10.0233	3.11	3.91	4.8	9.74	9.81	10.52	GDPD1	glycerophosphodiester phosphodiesterase domain containing 1 [Source:HGNC Symbol;Acc:HGNC:20883]
ENSG00000261373	0.404491	-1.30582	4.81223e-16	3.50745e-15	yes	down	11.47	4.04667	11.33	10.89	12.19	3.81	4.51	3.82	VPS9D1-AS1	VPS9D1 antisense RNA 1 [Source:HGNC Symbol;Acc:HGNC:48915]
ENSG00000136842	2.65269	1.40746	4.98136e-16	3.62685e-15	yes	up	2.16667	5.73667	1.68	2.32	2.5	6.11	5.39	5.71	TMOD1	tropomodulin 1 [Source:HGNC Symbol;Acc:HGNC:11871]
ENSG00000161677	2.14219	1.09909	6.40075e-16	4.63393e-15	yes	up	20.46	43.5467	21.8	20.07	19.51	42.62	46.24	41.78	JOSD2	Josephin domain containing 2 [Source:HGNC Symbol;Acc:HGNC:28853]
ENSG00000240476	2.66033	1.4116	6.52577e-16	4.7211e-15	yes	up	5.52667	16.16	5.51	5.9	5.17	15.33	16.12	17.03	LINC00973	long intergenic non-protein coding RNA 973 [Source:HGNC Symbol;Acc:HGNC:48868]
ENSG00000128482	21.4856	4.4253	7.0414e-16	5.08695e-15	yes	up	0.19	1.14667	0.12	0.03	0.42	0.93	0.8	1.71	RNF112	ring finger protein 112 [Source:HGNC Symbol;Acc:HGNC:12968]
ENSG00000260729	3.76614	1.91309	7.33977e-16	5.30063e-15	yes	up	1.32667	5.99667	0.99	1.83	1.16	6.84	5.77	5.38	AC009690.1	novel transcript
ENSG00000187650	6.60519	2.7236	7.71251e-16	5.56393e-15	yes	up	0.46	3.07667	0.33	0.66	0.39	3.19	2.99	3.05	VMAC	vimentin type intermediate filament associated coiled-coil protein [Source:HGNC Symbol;Acc:HGNC:33803]
ENSG00000118894	0.413272	-1.27484	1.04541e-15	7.4969e-15	yes	down	10.2033	4.55333	10.23	10.79	9.59	4.89	4.46	4.31	EEF2KMT	eukaryotic elongation factor 2 lysine methyltransferase [Source:HGNC Symbol;Acc:HGNC:32221]
ENSG00000149557	2.42249	1.27649	1.06391e-15	7.6215e-15	yes	up	8.93	18.0267	7.48	10.94	8.37	18.69	16.28	19.11	FEZ1	fasciculation and elongation protein zeta 1 [Source:HGNC Symbol;Acc:HGNC:3659]
ENSG00000162542	0.419707	-1.25255	1.37216e-15	9.81258e-15	yes	down	8.7	3.59	9.49	9.1	7.51	4.09	3.2	3.48	TMCO4	transmembrane and coiled-coil domains 4 [Source:HGNC Symbol;Acc:HGNC:27393]
ENSG00000178343	0.139246	-2.84429	1.74442e-15	1.2427e-14	yes	down	2.59667	0.366667	2.58	2.88	2.33	0.33	0.36	0.41	SHISA3	shisa family member 3 [Source:HGNC Symbol;Acc:HGNC:25159]
ENSG00000196689	2.11897	1.08336	2.12183e-15	1.50579e-14	yes	up	2.47667	5.2	2.34	2.28	2.81	5.04	4.82	5.74	TRPV1	transient receptor potential cation channel subfamily V member 1 [Source:HGNC Symbol;Acc:HGNC:12716]
ENSG00000256087	2.17413	1.12044	2.30451e-15	1.6343e-14	yes	up	4.29	7.94333	3.86	5.02	3.99	7.47	8.55	7.81	ZNF432	zinc finger protein 432 [Source:HGNC Symbol;Acc:HGNC:20810]
ENSG00000061918	0.27285	-1.87382	2.37816e-15	1.68479e-14	yes	down	3.23333	0.893333	3.18	3.36	3.16	0.89	0.86	0.93	GUCY1B1	guanylate cyclase 1 soluble subunit beta 1 [Source:HGNC Symbol;Acc:HGNC:4687]
ENSG00000233476	2.07479	1.05296	2.44674e-15	1.73277e-14	yes	up	16.54	29.9667	18.23	13.97	17.42	31	32.29	26.61	EEF1A1P6	eukaryotic translation elongation factor 1 alpha 1 pseudogene 6 [Source:HGNC Symbol;Acc:HGNC:3201]
ENSG00000253304	0.128878	-2.95592	3.11508e-15	2.19546e-14	yes	down	2.24333	0.286667	2.56	2.06	2.11	0.27	0.29	0.3	TMEM200B	transmembrane protein 200B [Source:HGNC Symbol;Acc:HGNC:33785]
ENSG00000174939	2.2765	1.18682	3.11945e-15	2.19703e-14	yes	up	9.18333	23.9467	9.23	8.99	9.33	26.21	24.96	20.67	ASPHD1	aspartate beta-hydroxylase domain containing 1 [Source:HGNC Symbol;Acc:HGNC:27380]
ENSG00000224321	7.20281	2.84856	3.21606e-15	2.26214e-14	yes	up	0.906667	6.04	1.18	1.29	0.25	6.84	6.61	4.67	RPL12P14	ribosomal protein L12 pseudogene 14 [Source:HGNC Symbol;Acc:HGNC:36495]
ENSG00000247679	3.17393	1.66627	3.44166e-15	2.41896e-14	yes	up	0.43	1.57667	0.35	0.42	0.52	1.52	1.81	1.4	AC139795.2	novel transcript
ENSG00000236675	2.77944	1.47479	3.47926e-15	2.44456e-14	yes	up	2.67667	7.49333	3.09	2.55	2.39	9.35	6.66	6.47	MTX1P1	metaxin 1 pseudogene 1 [Source:HGNC Symbol;Acc:HGNC:7505]
ENSG00000278932	2.01423	1.01023	3.80711e-15	2.6685e-14	yes	up	15.2667	51.4833	10.81	22.36	12.63	51.45	50.97	52.03	CR381653.1	novel transcript
ENSG00000254064	4.44211	2.15124	4.02131e-15	2.81478e-14	yes	up	0.493333	3.66	0.48	0.73	0.27	3.72	3.92	3.34	AC105206.2	novel transcript
ENSG00000158467	2.00246	1.00177	4.72272e-15	3.28777e-14	yes	up	2.49	5.18667	2.52	2.65	2.3	5.13	5.01	5.42	AHCYL2	adenosylhomocysteinase like 2 [Source:HGNC Symbol;Acc:HGNC:22204]
ENSG00000004777	0.220456	-2.18143	5.13801e-15	3.56717e-14	yes	down	3.15333	0.87	3.86	2.01	3.59	1.48	0.45	0.68	ARHGAP33	Rho GTPase activating protein 33 [Source:HGNC Symbol;Acc:HGNC:23085]
ENSG00000102878	2.67854	1.42145	5.33316e-15	3.69765e-14	yes	up	6.49333	18.33	5.58	7.35	6.55	15.72	20.75	18.52	HSF4	heat shock transcription factor 4 [Source:HGNC Symbol;Acc:HGNC:5227]
ENSG00000286140	0.375759	-1.41212	5.43738e-15	3.76735e-14	yes	down	12.2633	4.69	16.12	12.45	8.22	5.04	4.23	4.8	DERPC	DERPC, proline and glycine rich nuclear protein [Source:HGNC Symbol;Acc:HGNC:54084]
ENSG00000178445	0.114404	-3.1278	5.65692e-15	3.91682e-14	yes	down	2.06	0.523333	2.43	1.97	1.78	0.32	0.58	0.67	GLDC	glycine decarboxylase [Source:HGNC Symbol;Acc:HGNC:4313]
ENSG00000169302	8.19967	3.03557	5.70913e-15	3.95163e-14	yes	up	0.286667	1.57333	0.12	0.14	0.6	1.44	2.15	1.13	STK32A	serine/threonine kinase 32A [Source:HGNC Symbol;Acc:HGNC:28317]
ENSG00000114790	0.354682	-1.4954	5.84704e-15	4.04299e-14	yes	down	3.57333	1.34333	4.31	3.13	3.28	1	1.74	1.29	ARHGEF26	Rho guanine nucleotide exchange factor 26 [Source:HGNC Symbol;Acc:HGNC:24490]
ENSG00000110063	0.467197	-1.0979	5.95199e-15	4.11417e-14	yes	down	4.96667	2.27	6.17	4.4	4.33	1.94	2.53	2.34	DCPS	decapping enzyme, scavenger [Source:HGNC Symbol;Acc:HGNC:29812]
ENSG00000232810	3.48784	1.80233	6.2881e-15	4.34356e-14	yes	up	2.52	8.94333	2.12	3.35	2.09	7.01	10.26	9.56	TNF	tumor necrosis factor [Source:HGNC Symbol;Acc:HGNC:11892]
ENSG00000272419	2.15279	1.10621	6.37934e-15	4.40362e-14	yes	up	10.76	20.72	14.52	9.02	8.74	20.69	22.51	18.96	LINC01145	long intergenic non-protein coding RNA 1145 [Source:HGNC Symbol;Acc:HGNC:49462]
ENSG00000110881	0.38211	-1.38794	6.90114e-15	4.759e-14	yes	down	4.77667	1.89	4.4	5.66	4.27	1.91	1.54	2.22	ASIC1	acid sensing ion channel subunit 1 [Source:HGNC Symbol;Acc:HGNC:100]
ENSG00000178752	0.247745	-2.01307	7.84625e-15	5.39802e-14	yes	down	5.41	1.59	4.74	5.88	5.61	1.83	1.63	1.31	ERFE	erythroferrone [Source:HGNC Symbol;Acc:HGNC:26727]
ENSG00000167995	2.25113	1.17065	8.01651e-15	5.51145e-14	yes	up	5.16	9.51	5.08	5.42	4.98	9.47	8.87	10.19	BEST1	bestrophin 1 [Source:HGNC Symbol;Acc:HGNC:12703]
ENSG00000272711	0.137178	-2.86588	9.71346e-15	6.64911e-14	yes	down	4.71667	0.66	4.57	4.84	4.74	0.7	0.48	0.8	AC019069.1	novel transcript
ENSG00000203812	2.82671	1.49912	1.01223e-14	6.92431e-14	yes	up	15.8767	45.7267	15.3	15.61	16.72	51.65	44.24	41.29	HIST2H2AA3	histone cluster 2 H2A family member a3 [Source:HGNC Symbol;Acc:HGNC:4736]
ENSG00000224536	2.20568	1.14123	1.24759e-14	8.49182e-14	yes	up	2.71	6.11667	2.79	3.12	2.22	7.26	5.08	6.01	AC096677.1	novel transcript
ENSG00000161509	10.5658	3.40133	1.27193e-14	8.65175e-14	yes	up	0.0866667	0.92	0.08	0.11	0.07	1.03	0.81	0.92	GRIN2C	glutamate ionotropic receptor NMDA type subunit 2C [Source:HGNC Symbol;Acc:HGNC:4587]
ENSG00000103269	7.38108	2.88383	1.3515e-14	9.17777e-14	yes	up	0.366667	3.02333	0.44	0.19	0.47	2.76	3.31	3	RHBDL1	rhomboid like 1 [Source:HGNC Symbol;Acc:HGNC:10007]
ENSG00000261087	5.65582	2.49974	1.42997e-14	9.69456e-14	yes	up	0.426667	2.46	0.43	0.39	0.46	2.31	1.97	3.1	AP003469.4	novel transcript
ENSG00000237753	2.05519	1.03927	1.443e-14	9.77963e-14	yes	up	9.30667	19.4867	9.62	9.81	8.49	17.76	20.48	20.22	AC079922.2	novel transcript (FLJ42351)
ENSG00000106477	0.456586	-1.13104	1.58428e-14	1.07017e-13	yes	down	10.7467	4.81333	10.59	11.96	9.69	3.38	5.9	5.16	CEP41	centrosomal protein 41 [Source:HGNC Symbol;Acc:HGNC:12370]
ENSG00000203852	6.94665	2.79632	1.71961e-14	1.15911e-13	yes	up	0.52	3.79333	0.45	0.76	0.35	3.91	3.55	3.92	HIST2H3A	histone cluster 2 H3 family member a [Source:HGNC Symbol;Acc:HGNC:20505]
ENSG00000203811	6.94665	2.79632	1.71961e-14	1.15911e-13	yes	up	0.52	3.79333	0.45	0.76	0.35	3.91	3.55	3.92	HIST2H3C	histone cluster 2 H3 family member c [Source:HGNC Symbol;Acc:HGNC:20503]
ENSG00000140488	11.3297	3.50204	1.84729e-14	1.24332e-13	yes	up	0.18	1.83667	0.19	0.11	0.24	1.32	2.28	1.91	CELF6	CUGBP Elav-like family member 6 [Source:HGNC Symbol;Acc:HGNC:14059]
ENSG00000250510	0.25639	-1.96359	1.90471e-14	1.28071e-13	yes	down	4.41	1.24667	4.73	4.36	4.14	1.33	1.37	1.04	GPR162	G protein-coupled receptor 162 [Source:HGNC Symbol;Acc:HGNC:16693]
ENSG00000107821	2.86293	1.51749	2.03246e-14	1.36392e-13	yes	up	2.36333	6.81333	2.67	2.82	1.6	7.81	6.68	5.95	KAZALD1	Kazal type serine peptidase inhibitor domain 1 [Source:HGNC Symbol;Acc:HGNC:25460]
ENSG00000110200	0.415095	-1.26849	2.51064e-14	1.67712e-13	yes	down	29.03	11.6467	31.87	31.26	23.96	10.99	11.29	12.66	ANAPC15	anaphase promoting complex subunit 15 [Source:HGNC Symbol;Acc:HGNC:24531]
ENSG00000068615	0.388743	-1.36311	2.74781e-14	1.83137e-13	yes	down	4.82333	2.30667	5.16	4.78	4.53	2.33	2.82	1.77	REEP1	receptor accessory protein 1 [Source:HGNC Symbol;Acc:HGNC:25786]
ENSG00000102967	0.423497	-1.23958	2.7686e-14	1.84342e-13	yes	down	7.84333	3.58667	8.84	6.04	8.65	3.86	3.56	3.34	DHODH	dihydroorotate dehydrogenase (quinone) [Source:HGNC Symbol;Acc:HGNC:2867]
ENSG00000132423	0.415764	-1.26616	3.09148e-14	2.05507e-13	yes	down	18.68	7.77	20.47	17.39	18.18	9.07	6.15	8.09	COQ3	coenzyme Q3, methyltransferase [Source:HGNC Symbol;Acc:HGNC:18175]
ENSG00000132688	0.344681	-1.53667	3.30182e-14	2.18708e-13	yes	down	2.62333	0.916667	2.36	2.38	3.13	1.06	0.72	0.97	NES	nestin [Source:HGNC Symbol;Acc:HGNC:7756]
ENSG00000164199	0.480514	-1.05735	3.73743e-14	2.47083e-13	yes	down	3.06333	2.08667	3.15	3.06	2.98	1.91	2.18	2.17	ADGRV1	adhesion G protein-coupled receptor V1 [Source:HGNC Symbol;Acc:HGNC:17416]
ENSG00000128298	0.339915	-1.55675	3.76393e-14	2.48755e-13	yes	down	9.63333	3.72667	9.46	8.16	11.28	3.56	3.79	3.83	BAIAP2L2	BAI1 associated protein 2 like 2 [Source:HGNC Symbol;Acc:HGNC:26203]
ENSG00000242028	2.91578	1.54388	3.84651e-14	2.54048e-13	yes	up	2.71333	4.10333	3.18	2.32	2.64	4.05	4.04	4.22	HYPK	huntingtin interacting protein K [Source:HGNC Symbol;Acc:HGNC:18418]
ENSG00000197249	2.33933	1.2261	3.96735e-14	2.61861e-13	yes	up	4.30667	11.1733	4.42	4.6	3.9	10.42	11.06	12.04	SERPINA1	serpin family A member 1 [Source:HGNC Symbol;Acc:HGNC:8941]
ENSG00000278948	2.10607	1.07455	4.02838e-14	2.65632e-13	yes	up	6.11667	13.05	5.53	6.09	6.73	13.53	12.88	12.74	AL031587.5	TEC
ENSG00000197714	3.11336	1.63847	4.2574e-14	2.80553e-13	yes	up	1.45333	3.54333	1.23	1.34	1.79	4.09	2.78	3.76	ZNF460	zinc finger protein 460 [Source:HGNC Symbol;Acc:HGNC:21628]
ENSG00000204410	0.334492	-1.57996	4.379e-14	2.8801e-13	yes	down	9.61667	3.38667	9.97	8.88	10	2.87	2.53	4.76	MSH5	mutS homolog 5 [Source:HGNC Symbol;Acc:HGNC:7328]
ENSG00000179528	2.06253	1.04442	4.45216e-14	2.92727e-13	yes	up	8.28	12.77	7.39	9.17	8.28	12.4	10.31	15.6	LBX2	ladybird homeobox 2 [Source:HGNC Symbol;Acc:HGNC:15525]
ENSG00000117461	0.362484	-1.46401	4.82263e-14	3.16679e-13	yes	down	2.56333	0.956667	2.7	2.18	2.81	1.12	0.89	0.86	PIK3R3	phosphoinositide-3-kinase regulatory subunit 3 [Source:HGNC Symbol;Acc:HGNC:8981]
ENSG00000285796	2.36215	1.2401	5.3286e-14	3.49568e-13	yes	up	0.813333	1.94667	0.82	0.77	0.85	2.17	1.81	1.86	AL162458.1	novel transcript
ENSG00000165118	0.477662	-1.06594	6.27629e-14	4.10424e-13	yes	down	9.44	4.57667	9.3	9.35	9.67	4.15	5.15	4.43	C9orf64	chromosome 9 open reading frame 64 [Source:HGNC Symbol;Acc:HGNC:28144]
ENSG00000128284	2.53583	1.34246	6.68303e-14	4.36464e-13	yes	up	3.98333	9.61	4.21	3.73	4.01	8.66	11.52	8.65	APOL3	apolipoprotein L3 [Source:HGNC Symbol;Acc:HGNC:14868]
ENSG00000242147	2.83237	1.50201	7.85434e-14	5.11656e-13	yes	up	9.01	26.0433	9.63	9.97	7.43	26.88	25.88	25.37	LINC02657	long intergenic non-protein coding RNA 2657 [Source:HGNC Symbol;Acc:HGNC:54143]
ENSG00000153363	0.328966	-1.60399	8.53534e-14	5.55312e-13	yes	down	7.04333	1.97	7.62	6.8	6.71	2.3	1.98	1.63	LINC00467	long intergenic non-protein coding RNA 467 [Source:HGNC Symbol;Acc:HGNC:28227]
ENSG00000171408	5.59262	2.48352	8.93752e-14	5.80556e-13	yes	up	0.306667	2.31667	0.39	0.22	0.31	2.21	2.4	2.34	PDE7B	phosphodiesterase 7B [Source:HGNC Symbol;Acc:HGNC:8792]
ENSG00000249279	0.420359	-1.25031	9.1752e-14	5.95618e-13	yes	down	11.25	4.62667	12.23	10.8	10.72	4.13	5.31	4.44	LINC02057	long intergenic non-protein coding RNA 2057 [Source:HGNC Symbol;Acc:HGNC:52900]
ENSG00000155846	0.494247	-1.0167	1.00192e-13	6.48968e-13	yes	down	2.42667	1.21	2.73	2.32	2.23	1.35	1.1	1.18	PPARGC1B	PPARG coactivator 1 beta [Source:HGNC Symbol;Acc:HGNC:30022]
ENSG00000079841	0.147134	-2.7648	1.08699e-13	7.02957e-13	yes	down	2.35333	0.4	2.41	1.48	3.17	0.24	0.41	0.55	RIMS1	regulating synaptic membrane exocytosis 1 [Source:HGNC Symbol;Acc:HGNC:17282]
ENSG00000109255	0.274443	-1.86542	1.10784e-13	7.15989e-13	yes	down	16.6667	4.53667	15.84	17.78	16.38	3.99	3.78	5.84	NMU	neuromedin U [Source:HGNC Symbol;Acc:HGNC:7859]
ENSG00000159261	2.44465	1.28963	1.28919e-13	8.30313e-13	yes	up	5.92	15.05	5.48	5.9	6.38	13.48	14.71	16.96	CLDN14	claudin 14 [Source:HGNC Symbol;Acc:HGNC:2035]
ENSG00000280043	3.064	1.61542	1.49567e-13	9.60316e-13	yes	up	2.42333	7.61667	2.97	2.35	1.95	8.52	7.38	6.95	AC118282.4	tec
ENSG00000127415	2.39055	1.25734	1.57127e-13	1.00755e-12	yes	up	4.83	12.48	4.83	4.43	5.23	10.53	13.21	13.7	IDUA	iduronidase, alpha-L- [Source:HGNC Symbol;Acc:HGNC:5391]
ENSG00000197363	2.26303	1.17826	1.57357e-13	1.00871e-12	yes	up	3.21667	7.61667	3.2	3.44	3.01	6.92	7.68	8.25	ZNF517	zinc finger protein 517 [Source:HGNC Symbol;Acc:HGNC:27984]
ENSG00000088766	2.01026	1.00738	1.61594e-13	1.03457e-12	yes	up	13.0433	18.15	14.5	13.08	11.55	16.02	17.66	20.77	CRLS1	cardiolipin synthase 1 [Source:HGNC Symbol;Acc:HGNC:16148]
ENSG00000164342	2.08042	1.05688	1.70227e-13	1.08916e-12	yes	up	2.90667	5.03333	3.13	2.26	3.33	6.49	4.84	3.77	TLR3	toll like receptor 3 [Source:HGNC Symbol;Acc:HGNC:11849]
ENSG00000154274	0.347744	-1.5239	1.82824e-13	1.1694e-12	yes	down	4.4	1.41667	4.37	4.67	4.16	1.44	1.4	1.41	C4orf19	chromosome 4 open reading frame 19 [Source:HGNC Symbol;Acc:HGNC:25618]
ENSG00000186395	2.35359	1.23486	1.97526e-13	1.26147e-12	yes	up	13.82	28.0067	14.51	9.42	17.53	28.74	29.79	25.49	KRT10	keratin 10 [Source:HGNC Symbol;Acc:HGNC:6413]
ENSG00000243225	17.5623	4.13441	2.03825e-13	1.30129e-12	yes	up	1.02333	18.6167	0.97	1.42	0.68	16.14	18.19	21.52	AC007686.1	ribosomal protein, large, P1 (RPLP1) pseudogene
ENSG00000151468	0.139981	-2.8367	2.08426e-13	1.32983e-12	yes	down	1.86	0.26	1.81	2.17	1.6	0.23	0.28	0.27	CCDC3	coiled-coil domain containing 3 [Source:HGNC Symbol;Acc:HGNC:23813]
ENSG00000213397	0.424503	-1.23615	2.08939e-13	1.33269e-12	yes	down	24.33	9.74333	23.35	24.85	24.79	12.95	7.25	9.03	HAUS7	HAUS augmin like complex subunit 7 [Source:HGNC Symbol;Acc:HGNC:32979]
ENSG00000133101	0.40434	-1.30636	2.24255e-13	1.42772e-12	yes	down	9.19333	3.73667	9.14	9.74	8.7	3.48	4.03	3.7	CCNA1	cyclin A1 [Source:HGNC Symbol;Acc:HGNC:1577]
ENSG00000182871	0.429216	-1.22022	2.41474e-13	1.53543e-12	yes	down	3.33333	1.68667	2.97	3.45	3.58	1.65	1.88	1.53	COL18A1	collagen type XVIII alpha 1 chain [Source:HGNC Symbol;Acc:HGNC:2195]
ENSG00000169760	0.405146	-1.30349	2.64255e-13	1.67562e-12	yes	down	2.79333	1.09333	2.95	2.63	2.8	1.05	1.18	1.05	NLGN1	neuroligin 1 [Source:HGNC Symbol;Acc:HGNC:14291]
ENSG00000175643	0.388633	-1.36352	2.64258e-13	1.67562e-12	yes	down	13.25	5.04	12.45	12.45	14.85	4.38	4.55	6.19	RMI2	RecQ mediated genome instability 2 [Source:HGNC Symbol;Acc:HGNC:28349]
ENSG00000258354	2.19614	1.13497	2.69412e-13	1.70725e-12	yes	up	2.32333	5.55	2.16	2.24	2.57	5.95	4.38	6.32	AC138932.2	microRNA 3180-1
ENSG00000241472	0.252815	-1.98385	2.79264e-13	1.76859e-12	yes	down	12.0067	4.86667	11.45	13.78	10.79	9.79	2.46	2.35	PTPRG-AS1	PTPRG antisense RNA 1 [Source:HGNC Symbol;Acc:HGNC:44638]
ENSG00000279232	0.417687	-1.25951	3.05145e-13	1.92772e-12	yes	down	7.6	3.23	8.31	7.66	6.83	3.61	2.32	3.76	AC008522.1	novel transcript, antisense to RGMB
ENSG00000146966	0.383719	-1.38188	3.07662e-13	1.94182e-12	yes	down	4.22667	1.9	4.12	3.82	4.74	1.44	2.8	1.46	DENND2A	DENN domain containing 2A [Source:HGNC Symbol;Acc:HGNC:22212]
ENSG00000183780	0.370901	-1.43089	3.16074e-13	1.99307e-12	yes	down	4.71	1.77	4.8	4.34	4.99	1.72	1.48	2.11	SLC35F3	solute carrier family 35 member F3 [Source:HGNC Symbol;Acc:HGNC:23616]
ENSG00000141449	0.428528	-1.22254	3.4877e-13	2.19789e-12	yes	down	3.1	1.36	3.47	3.19	2.64	1.43	1.58	1.07	GREB1L	GREB1 like retinoic acid receptor coactivator [Source:HGNC Symbol;Acc:HGNC:31042]
ENSG00000081181	3.12396	1.64337	3.53166e-13	2.22354e-12	yes	up	2.03333	6.52667	2.23	2.07	1.8	7.52	6.74	5.32	ARG2	arginase 2 [Source:HGNC Symbol;Acc:HGNC:664]
ENSG00000141642	0.233658	-2.09753	3.82992e-13	2.40689e-12	yes	down	6.32667	1.75667	5.22	6.06	7.7	2.12	1.41	1.74	ELAC1	elaC ribonuclease Z 1 [Source:HGNC Symbol;Acc:HGNC:14197]
ENSG00000214049	0.189757	-2.39777	3.98819e-13	2.50099e-12	yes	down	5.64	1.32667	8.13	4.66	4.13	1.35	1.4	1.23	UCA1	urothelial cancer associated 1 [Source:HGNC Symbol;Acc:HGNC:37126]
ENSG00000273542	3.20715	1.68129	3.99465e-13	2.50427e-12	yes	up	0.606667	1.96	0.58	0.48	0.76	1.8	1.91	2.17	HIST1H4K	histone cluster 1 H4 family member k [Source:HGNC Symbol;Acc:HGNC:4784]
ENSG00000080493	0.243845	-2.03597	4.22977e-13	2.6468e-12	yes	down	0.89	0.293333	0.84	0.89	0.94	0.24	0.44	0.2	SLC4A4	solute carrier family 4 member 4 [Source:HGNC Symbol;Acc:HGNC:11030]
ENSG00000234498	2.01589	1.01141	4.3427e-13	2.71415e-12	yes	up	8.63333	20.8567	9.18	8.42	8.3	21.32	18.41	22.84	RPL13AP20	ribosomal protein L13a pseudogene 20 [Source:HGNC Symbol;Acc:HGNC:35709]
ENSG00000255152	0.431916	-1.21118	4.5859e-13	2.86179e-12	yes	down	5.39333	2.77667	4.67	6.33	5.18	2.64	3.57	2.12	MSH5-SAPCD1	MSH5-SAPCD1 readthrough (NMD candidate) [Source:HGNC Symbol;Acc:HGNC:41994]
ENSG00000152527	0.346152	-1.53052	5.00869e-13	3.11424e-12	yes	down	1.81	0.53	2.2	1.67	1.56	0.58	0.54	0.47	PLEKHH2	pleckstrin homology, MyTH4 and FERM domain containing H2 [Source:HGNC Symbol;Acc:HGNC:30506]
ENSG00000185418	2.02689	1.01927	5.33286e-13	3.31378e-12	yes	up	3.24333	6.78667	3.15	3.47	3.11	6.15	7.83	6.38	TARSL2	threonyl-tRNA synthetase like 2 [Source:HGNC Symbol;Acc:HGNC:24728]
ENSG00000276168	2.18089	1.12492	6.71656e-13	4.14843e-12	yes	up	252.82	548.967	193.68	263.92	300.86	667.59	491.88	487.43	RN7SL1	RNA, 7SL, cytoplasmic 1 [Source:HGNC Symbol;Acc:HGNC:10038]
ENSG00000215769	2.48803	1.31501	6.75061e-13	4.16695e-12	yes	up	4.24667	10.2467	3.06	5.56	4.12	10.69	9.43	10.62	ARHGAP27P1-BPTFP1-KPNA2P3	ARHGAP27P1-BPTFP1-KPNA2P3 readthrough, transcribed pseudogene [Source:HGNC Symbol;Acc:HGNC:52873]
ENSG00000157322	6.26157	2.64653	7.72382e-13	4.75193e-12	yes	up	0.283333	1.68	0.26	0.31	0.28	1.56	1.73	1.75	CLEC18A	C-type lectin domain family 18 member A [Source:HGNC Symbol;Acc:HGNC:30388]
ENSG00000224877	2.2683	1.18161	8.21497e-13	5.04651e-12	yes	up	43.9867	101.523	33.17	38.45	60.34	86.62	105.75	112.2	NDUFAF8	NADH:ubiquinone oxidoreductase complex assembly factor 8 [Source:HGNC Symbol;Acc:HGNC:33551]
ENSG00000182324	5.10547	2.35204	8.37111e-13	5.14089e-12	yes	up	0.74	2.3	0.85	0.7	0.67	2.61	1.83	2.46	KCNJ14	potassium voltage-gated channel subfamily J member 14 [Source:HGNC Symbol;Acc:HGNC:6260]
ENSG00000229563	3.88458	1.95776	8.83994e-13	5.42068e-12	yes	up	0.7	2.64	0.67	0.72	0.71	2.71	2.58	2.63	LINC01204	long intergenic non-protein coding RNA 1204 [Source:HGNC Symbol;Acc:HGNC:49635]
ENSG00000274020	2.52286	1.33506	1.01308e-12	6.18817e-12	yes	up	5.86333	15.7167	6.74	5.57	5.28	15.13	15.5	16.52	LINC01138	long intergenic non-protein coding RNA 1138 [Source:HGNC Symbol;Acc:HGNC:49454]
ENSG00000234964	0.257396	-1.95794	1.01733e-12	6.21228e-12	yes	down	78.9033	20.6167	62.5	59.98	114.23	25.25	19	17.6	FABP5P7	fatty acid binding protein 5 pseudogene 7 [Source:HGNC Symbol;Acc:HGNC:31070]
ENSG00000140678	2.15413	1.1071	1.05514e-12	6.43737e-12	yes	up	3.14333	5.75333	3.12	3.71	2.6	5.68	5.71	5.87	ITGAX	integrin subunit alpha X [Source:HGNC Symbol;Acc:HGNC:6152]
ENSG00000176531	2.11545	1.08096	1.11157e-12	6.7696e-12	yes	up	7.28333	10.34	5.22	6.11	10.52	9.87	10.61	10.54	PHLDB3	pleckstrin homology like domain family B member 3 [Source:HGNC Symbol;Acc:HGNC:30499]
ENSG00000260914	0.298082	-1.74622	1.34644e-12	8.15874e-12	yes	down	15.69	4.78	19.56	15.18	12.33	7.35	3.62	3.37	AC026464.4	novel protein
ENSG00000214530	2.37657	1.24888	1.46929e-12	8.87159e-12	yes	up	9.12667	22.48	10.09	10.17	7.12	28.6	18.65	20.19	STARD10	StAR related lipid transfer domain containing 10 [Source:HGNC Symbol;Acc:HGNC:10666]
ENSG00000152229	2.32942	1.21997	1.53532e-12	9.26212e-12	yes	up	3.11333	7.51	3.82	3.04	2.48	9.15	7.92	5.46	PSTPIP2	proline-serine-threonine phosphatase interacting protein 2 [Source:HGNC Symbol;Acc:HGNC:9581]
ENSG00000213344	2.6926	1.429	1.53802e-12	9.2757e-12	yes	up	5.37333	14.5533	6.64	3.93	5.55	16.27	17.02	10.37	PCNPP3	PEST containing nuclear protein pseudogene 3 [Source:HGNC Symbol;Acc:HGNC:41975]
ENSG00000176945	4.66461	2.22176	1.54315e-12	9.30389e-12	yes	up	0.92	3.22667	0.51	0.34	1.91	3.24	3.41	3.03	MUC20	mucin 20, cell surface associated [Source:HGNC Symbol;Acc:HGNC:23282]
ENSG00000286235	0.423155	-1.24074	1.65153e-12	9.92518e-12	yes	down	5.47333	2.34	5.91	4.27	6.24	2.4	1.79	2.83	AL035461.3	novel protein
ENSG00000280649	4.58538	2.19704	1.86933e-12	1.12012e-11	yes	up	1.75333	8.25	1.14	2.49	1.63	8.13	7.48	9.14	AC245100.8	TEC
ENSG00000142303	2.72008	1.44365	1.91512e-12	1.14655e-11	yes	up	2.75	7.41	2.22	3.54	2.49	7.66	5.57	9	ADAMTS10	ADAM metallopeptidase with thrombospondin type 1 motif 10 [Source:HGNC Symbol;Acc:HGNC:13201]
ENSG00000168477	77.4952	6.27603	2.15901e-12	1.28805e-11	yes	up	0.0166667	1.43667	0	0	0.05	1.93	1.21	1.17	TNXB	tenascin XB [Source:HGNC Symbol;Acc:HGNC:11976]
ENSG00000260941	5.52067	2.46484	2.18762e-12	1.30474e-11	yes	up	0.72	4.1	0.58	0.98	0.6	4.89	3.37	4.04	LINC00622	long intergenic non-protein coding RNA 622 [Source:HGNC Symbol;Acc:HGNC:44251]
ENSG00000171346	2.83271	1.50218	2.22753e-12	1.32738e-11	yes	up	3.10667	8.53333	3.75	2.46	3.11	7.81	8.48	9.31	KRT15	keratin 15 [Source:HGNC Symbol;Acc:HGNC:6421]
ENSG00000271741	2.12625	1.08831	2.34863e-12	1.39792e-11	yes	up	2.57	5.31667	2.27	3.09	2.35	4.9	5.39	5.66	AC114490.2	novel transcript, ZMYM6-ZMYM6NB readthrough
ENSG00000134198	0.124066	-3.01082	2.36603e-12	1.40786e-11	yes	down	1.56	0.293333	1.45	1.37	1.86	0.29	0.2	0.39	TSPAN2	tetraspanin 2 [Source:HGNC Symbol;Acc:HGNC:20659]
ENSG00000178150	0.469393	-1.09113	2.48032e-12	1.47373e-11	yes	down	13.5233	5.60333	14.39	13.99	12.19	6.56	4.15	6.1	ZNF114	zinc finger protein 114 [Source:HGNC Symbol;Acc:HGNC:12894]
ENSG00000111644	17.3884	4.12005	2.49918e-12	1.48408e-11	yes	up	0.206667	3.37	0.07	0.26	0.29	2.75	4.59	2.77	ACRBP	acrosin binding protein [Source:HGNC Symbol;Acc:HGNC:17195]
ENSG00000087301	0.473058	-1.07991	2.50801e-12	1.48889e-11	yes	down	4.31	2.16	4.22	4.44	4.27	1.73	2.2	2.55	TXNDC16	thioredoxin domain containing 16 [Source:HGNC Symbol;Acc:HGNC:19965]
ENSG00000155265	4.58224	2.19605	2.5363e-12	1.50524e-11	yes	up	0.21	0.97	0.14	0.23	0.26	0.83	1.03	1.05	GOLGA7B	golgin A7 family member B [Source:HGNC Symbol;Acc:HGNC:31668]
ENSG00000258465	0.441608	-1.17916	2.60144e-12	1.54346e-11	yes	down	10.1067	4.5	9.8	8.2	12.32	4.58	4.1	4.82	AL139011.2	novel protein
ENSG00000244274	0.446289	-1.16395	2.64023e-12	1.56602e-11	yes	down	18.18	8.1	16.85	19.74	17.95	7.66	9.13	7.51	DBNDD2	dysbindin domain containing 2 [Source:HGNC Symbol;Acc:HGNC:15881]
ENSG00000213906	2.94149	1.55655	2.66527e-12	1.5795e-11	yes	up	1.19667	3.61333	1.27	1.43	0.89	3.45	3.48	3.91	LTB4R2	leukotriene B4 receptor 2 [Source:HGNC Symbol;Acc:HGNC:19260]
ENSG00000138587	0.300258	-1.73573	2.72208e-12	1.61145e-11	yes	down	5.48333	1.77667	4.79	6.05	5.61	2.37	1.33	1.63	MNS1	meiosis specific nuclear structural 1 [Source:HGNC Symbol;Acc:HGNC:29636]
ENSG00000128346	2.44869	1.29201	2.82371e-12	1.67001e-11	yes	up	3.97667	9.54667	3.5	3.63	4.8	10.35	9.44	8.85	C22orf23	chromosome 22 open reading frame 23 [Source:HGNC Symbol;Acc:HGNC:18589]
ENSG00000237975	49.1519	5.61917	2.87807e-12	1.70167e-11	yes	up	0.0333333	1.77333	0.05	0.02	0.03	1.65	1.55	2.12	FLG-AS1	FLG antisense RNA 1 [Source:HGNC Symbol;Acc:HGNC:27913]
ENSG00000177854	0.329838	-1.60017	2.88776e-12	1.70691e-11	yes	down	7.99667	3.05333	6.84	8.75	8.4	3.53	3.03	2.6	TMEM187	transmembrane protein 187 [Source:HGNC Symbol;Acc:HGNC:13705]
ENSG00000101546	0.44393	-1.1716	3.00419e-12	1.77368e-11	yes	down	9.66667	5.49333	8.62	11	9.38	5.15	3.59	7.74	RBFA	ribosome binding factor A [Source:HGNC Symbol;Acc:HGNC:26120]
ENSG00000137462	3.56321	1.83318	3.21577e-12	1.89531e-11	yes	up	1.04333	3.74667	0.87	1.57	0.69	2.99	4.81	3.44	TLR2	toll like receptor 2 [Source:HGNC Symbol;Acc:HGNC:11848]
ENSG00000186352	4.74653	2.24687	3.28375e-12	1.93427e-11	yes	up	2.91	12.9	1.91	3.73	3.09	12.57	14.58	11.55	ANKRD37	ankyrin repeat domain 37 [Source:HGNC Symbol;Acc:HGNC:29593]
ENSG00000184481	2.12298	1.08609	3.34778e-12	1.97085e-11	yes	up	2.92333	6.3	2.62	3.2	2.95	6.65	6.65	5.6	FOXO4	forkhead box O4 [Source:HGNC Symbol;Acc:HGNC:7139]
ENSG00000067715	2.13538	1.09449	3.40734e-12	2.00303e-11	yes	up	2.59667	4.27667	2.15	2.84	2.8	4.34	4.32	4.17	SYT1	synaptotagmin 1 [Source:HGNC Symbol;Acc:HGNC:11509]
ENSG00000196917	0.130856	-2.93395	3.42842e-12	2.01485e-11	yes	down	0.913333	0.123333	0.81	1.03	0.9	0.18	0.1	0.09	HCAR1	hydroxycarboxylic acid receptor 1 [Source:HGNC Symbol;Acc:HGNC:4532]
ENSG00000273311	0.320212	-1.6429	3.44132e-12	2.02185e-11	yes	down	4.35	1.41667	4.71	3.83	4.51	1.37	1.46	1.42	DGCR11	DiGeorge syndrome critical region gene 11 [Source:HGNC Symbol;Acc:HGNC:17226]
ENSG00000198816	2.08011	1.05666	3.59555e-12	2.11004e-11	yes	up	5.00667	10.3367	4.89	5.16	4.97	11.06	10.08	9.87	ZNF358	zinc finger protein 358 [Source:HGNC Symbol;Acc:HGNC:16838]
ENSG00000160801	0.171704	-2.54201	3.66804e-12	2.15073e-11	yes	down	4.82333	1.07667	4.53	4.81	5.13	0.51	0.81	1.91	PTH1R	parathyroid hormone 1 receptor [Source:HGNC Symbol;Acc:HGNC:9608]
ENSG00000173041	0.462418	-1.11273	3.76496e-12	2.20567e-11	yes	down	7.76333	4.18667	7.41	6.55	9.33	2.87	4.15	5.54	ZNF680	zinc finger protein 680 [Source:HGNC Symbol;Acc:HGNC:26897]
ENSG00000124171	2.34628	1.23037	4.0548e-12	2.37072e-11	yes	up	1.41333	3.35333	1.17	1.48	1.59	3.41	3.18	3.47	PARD6B	par-6 family cell polarity regulator beta [Source:HGNC Symbol;Acc:HGNC:16245]
ENSG00000267374	0.113992	-3.13299	4.4752e-12	2.61279e-11	yes	down	4.96	1.01	5.5	5.2	4.18	1.4	0.5	1.13	AC016205.1	novel transcript
ENSG00000198331	0.479043	-1.06177	5.09885e-12	2.96928e-11	yes	down	11.2533	5.53667	11.32	11.04	11.4	5.7	5.86	5.05	HYLS1	HYLS1, centriolar and ciliogenesis associated [Source:HGNC Symbol;Acc:HGNC:26558]
ENSG00000274611	2.3399	1.22645	5.96816e-12	3.46173e-11	yes	up	4.31667	10.3433	3.57	5.44	3.94	10.13	10.33	10.57	TBC1D3	TBC1 domain family member 3 [Source:HGNC Symbol;Acc:HGNC:19031]
ENSG00000124140	2.64032	1.40071	6.1888e-12	3.58565e-11	yes	up	11.8133	13.88	10	13.25	12.19	15.2	14.53	11.91	SLC12A5	solute carrier family 12 member 5 [Source:HGNC Symbol;Acc:HGNC:13818]
ENSG00000236778	4.51953	2.17617	6.29799e-12	3.64788e-11	yes	up	1.52333	5.6	1.56	1.39	1.62	5.05	6.89	4.86	INTS6-AS1	INTS6 antisense RNA 1 [Source:HGNC Symbol;Acc:HGNC:42691]
ENSG00000158458	2.04938	1.03519	6.70279e-12	3.87686e-11	yes	up	4.20667	7.19667	4.1	5.3	3.22	6.56	6.72	8.31	NRG2	neuregulin 2 [Source:HGNC Symbol;Acc:HGNC:7998]
ENSG00000215190	0.32169	-1.63626	6.77456e-12	3.91506e-11	yes	down	6.77667	2.14667	7.1	6.68	6.55	3.07	1.66	1.71	LINC00680	long intergenic non-protein coding RNA 680 [Source:HGNC Symbol;Acc:HGNC:44417]
ENSG00000169184	2.12406	1.08683	9.08721e-12	5.21185e-11	yes	up	1.33333	2.52333	1.73	0.95	1.32	2.9	2.25	2.42	MN1	MN1 proto-oncogene, transcriptional regulator [Source:HGNC Symbol;Acc:HGNC:7180]
ENSG00000170364	0.316374	-1.6603	9.86217e-12	5.6421e-11	yes	down	5.50667	2.07	6.57	5.26	4.69	2.31	1.73	2.17	SETMAR	SET domain and mariner transposase fusion gene [Source:HGNC Symbol;Acc:HGNC:10762]
ENSG00000177076	2.77575	1.47288	1.00925e-11	5.76584e-11	yes	up	1.40667	3.88667	1.16	1.57	1.49	3.76	4.16	3.74	ACER2	alkaline ceramidase 2 [Source:HGNC Symbol;Acc:HGNC:23675]
ENSG00000273398	0.205853	-2.28032	1.03602e-11	5.91379e-11	yes	down	2.41667	0.513333	2.45	2.5	2.3	0.56	0.51	0.47	AC017083.3	novel transcript
ENSG00000122592	0.423887	-1.23825	1.0843e-11	6.17735e-11	yes	down	7.42	3.57333	7.04	7.63	7.59	3.15	4.63	2.94	HOXA7	homeobox A7 [Source:HGNC Symbol;Acc:HGNC:5108]
ENSG00000285982	2.49686	1.32012	1.10215e-11	6.27382e-11	yes	up	1.84667	4.65667	2.01	1.44	2.09	4.99	4.44	4.54	AC012213.5	novel protein
ENSG00000269583	11.1622	3.48055	1.10374e-11	6.28113e-11	yes	up	1.16667	13.2267	1.45	2.05	0	13.08	14.59	12.01	L34079.3	novel transcript, antisense to XRCC1
ENSG00000198211	3.40286	1.76675	1.13869e-11	6.47102e-11	yes	up	0.816667	2.38667	0.9	0.86	0.69	2.46	1.9	2.8	AC092143.1	novel protein (MC1R-TUBB3 readthrough)
ENSG00000162639	0.427494	-1.22602	1.18215e-11	6.70865e-11	yes	down	9.58667	4.17	10.49	9.47	8.8	4.21	3.61	4.69	HENMT1	HEN methyltransferase 1 [Source:HGNC Symbol;Acc:HGNC:26400]
ENSG00000268205	2.3818	1.25205	1.24505e-11	7.04418e-11	yes	up	1.36333	3.29	1.37	1.19	1.53	3.58	3.3	2.99	AC005261.1	novel transcript
ENSG00000219665	2.36574	1.24229	1.25204e-11	7.08174e-11	yes	up	11.4433	32.6533	11.82	11.09	11.42	36.8	31.72	29.44	ZNF433-AS1	ZNF433 and ZNF878 antisense RNA 1 [Source:HGNC Symbol;Acc:HGNC:53776]
ENSG00000176222	2.81148	1.49133	1.38092e-11	7.79565e-11	yes	up	1.75333	4.95667	1.92	1.47	1.87	3.86	5.66	5.35	ZNF404	zinc finger protein 404 [Source:HGNC Symbol;Acc:HGNC:19417]
ENSG00000132031	0.246588	-2.01982	1.39465e-11	7.86885e-11	yes	down	2.72667	0.656667	2.52	3.17	2.49	0.52	0.74	0.71	MATN3	matrilin 3 [Source:HGNC Symbol;Acc:HGNC:6909]
ENSG00000181004	2.22696	1.15507	1.45378e-11	8.19569e-11	yes	up	2.25	5.07	1.95	2.44	2.36	4.97	5.51	4.73	BBS12	Bardet-Biedl syndrome 12 [Source:HGNC Symbol;Acc:HGNC:26648]
ENSG00000082482	0.121841	-3.03693	1.54139e-11	8.67049e-11	yes	down	4.23	2.49667	5.7	1.47	5.52	2.17	0.18	5.14	KCNK2	potassium two pore domain channel subfamily K member 2 [Source:HGNC Symbol;Acc:HGNC:6277]
ENSG00000183250	0.453698	-1.1402	1.58095e-11	8.8881e-11	yes	down	13.3433	6.16	14.65	12.65	12.73	6.35	6.89	5.24	LINC01547	long intergenic non-protein coding RNA 1547 [Source:HGNC Symbol;Acc:HGNC:15707]
ENSG00000104835	0.45983	-1.12083	1.6298e-11	9.14516e-11	yes	down	14.6233	6.59	17.37	13.57	12.93	6.53	6.18	7.06	SARS2	seryl-tRNA synthetase 2, mitochondrial [Source:HGNC Symbol;Acc:HGNC:17697]
ENSG00000270800	0.468241	-1.09468	1.7307e-11	9.70336e-11	yes	down	8.25	4.02333	8.76	8.53	7.46	4.7	4.21	3.16	RPS10-NUDT3	RPS10-NUDT3 readthrough [Source:HGNC Symbol;Acc:HGNC:49181]
ENSG00000125454	0.465883	-1.10196	1.78937e-11	1.00241e-10	yes	down	14.21	7.34667	17.66	13.25	11.72	7.18	7.39	7.47	SLC25A19	solute carrier family 25 member 19 [Source:HGNC Symbol;Acc:HGNC:14409]
ENSG00000126803	0.181157	-2.46469	1.8657e-11	1.04346e-10	yes	down	1.94	0.376667	1.93	2.03	1.86	0.22	0.53	0.38	HSPA2	heat shock protein family A (Hsp70) member 2 [Source:HGNC Symbol;Acc:HGNC:5235]
ENSG00000183765	0.491204	-1.0256	1.9122e-11	1.06888e-10	yes	down	15.4067	6.89667	16.32	16.02	13.88	5.75	5.99	8.95	CHEK2	checkpoint kinase 2 [Source:HGNC Symbol;Acc:HGNC:16627]
ENSG00000196208	2.02186	1.01568	1.92645e-11	1.07626e-10	yes	up	1.72333	3.66	1.87	1.57	1.73	3.92	3.45	3.61	GREB1	growth regulating estrogen receptor binding 1 [Source:HGNC Symbol;Acc:HGNC:24885]
ENSG00000215695	0.00301709	-8.37263	1.92901e-11	1.0774e-10	yes	down	2.21	0	1.46	3.15	2.02	0	0	0	RSC1A1	regulator of solute carriers 1 [Source:HGNC Symbol;Acc:HGNC:10458]
ENSG00000161912	7.29663	2.86723	2.02562e-11	1.12981e-10	yes	up	0.25	2.05667	0.57	0.09	0.09	1.77	2.2	2.2	ADCY10P1	adenylate cyclase 10, soluble pseudogene 1 [Source:HGNC Symbol;Acc:HGNC:44143]
ENSG00000226330	2.68934	1.42725	2.03402e-11	1.13357e-10	yes	up	0.676667	1.83667	0.57	0.67	0.79	1.56	2.08	1.87	AL606489.1	novel transcript
ENSG00000270504	2.28025	1.18919	2.25632e-11	1.25337e-10	yes	up	2.59667	6.02667	2.49	3.01	2.29	5.51	5.7	6.87	AL391422.4	novel transcript, antisense to PXDC1
ENSG00000218891	2.09191	1.06482	2.61308e-11	1.44567e-10	yes	up	5.63	10.9533	5.08	4.64	7.17	10.78	10.51	11.57	ZNF579	zinc finger protein 579 [Source:HGNC Symbol;Acc:HGNC:26646]
ENSG00000158483	0.334013	-1.58202	2.6131e-11	1.44567e-10	yes	down	5.78	1.92667	5.87	5.52	5.95	2.32	1.84	1.62	FAM86C1	family with sequence similarity 86 member C1 [Source:HGNC Symbol;Acc:HGNC:25561]
ENSG00000134339	16.8165	4.0718	2.70845e-11	1.49641e-10	yes	up	0.713333	7.95667	0.73	0.37	1.04	10.09	4.98	8.8	SAA2	serum amyloid A2 [Source:HGNC Symbol;Acc:HGNC:10514]
ENSG00000121316	0.196178	-2.34976	2.72855e-11	1.5071e-10	yes	down	2.97667	0.63	2.42	3.45	3.06	0.63	0.67	0.59	PLBD1	phospholipase B domain containing 1 [Source:HGNC Symbol;Acc:HGNC:26215]
ENSG00000227598	0.184875	-2.43538	2.86666e-11	1.57955e-10	yes	down	1.99667	0.36	1.74	2.15	2.1	0.24	0.13	0.71	Z94721.1	novel transcript
ENSG00000011332	0.258226	-1.95329	2.89847e-11	1.59623e-10	yes	down	4.08667	1.11	4.72	4.19	3.35	1.19	1.13	1.01	DPF1	double PHD fingers 1 [Source:HGNC Symbol;Acc:HGNC:20225]
ENSG00000145945	0.425902	-1.23141	3.15791e-11	1.7349e-10	yes	down	8.80667	3.80667	7.83	9.15	9.44	4.19	3.75	3.48	FAM50B	family with sequence similarity 50 member B [Source:HGNC Symbol;Acc:HGNC:18789]
ENSG00000065320	0.477905	-1.0652	3.30354e-11	1.81151e-10	yes	down	3.08	1.45	3.43	2.95	2.86	1.37	1.71	1.27	NTN1	netrin 1 [Source:HGNC Symbol;Acc:HGNC:8029]
ENSG00000245571	2.40754	1.26756	3.50921e-11	1.9212e-10	yes	up	2.08	5.02333	1.86	2.27	2.11	5.44	4.3	5.33	FAM111A-DT	FAM111A divergent transcript [Source:HGNC Symbol;Acc:HGNC:53752]
ENSG00000271503	31.9163	4.99622	3.73543e-11	2.04069e-10	yes	up	0.0933333	3.10667	0.1	0.11	0.07	2.88	3.29	3.15	CCL5	C-C motif chemokine ligand 5 [Source:HGNC Symbol;Acc:HGNC:10632]
ENSG00000214407	0.278864	-1.84237	3.78922e-11	2.06842e-10	yes	down	3.75	1.05333	3.69	3.39	4.17	0.95	1.46	0.75	LINC02085	long intergenic non-protein coding RNA 2085 [Source:HGNC Symbol;Acc:HGNC:27190]
ENSG00000172456	0.401484	-1.31659	3.93037e-11	2.14375e-10	yes	down	8.63667	3.66333	9.18	10.39	6.34	4.33	3.13	3.53	FGGY	FGGY carbohydrate kinase domain containing [Source:HGNC Symbol;Acc:HGNC:25610]
ENSG00000187796	0.293182	-1.77013	3.95828e-11	2.15783e-10	yes	down	12.8567	14.9567	20.5	8.62	9.45	21.25	6.58	17.04	CARD9	caspase recruitment domain family member 9 [Source:HGNC Symbol;Acc:HGNC:16391]
ENSG00000072954	5.53722	2.46916	4.21345e-11	2.29388e-10	yes	up	0.646667	2.15	0.67	0.7	0.57	2.15	1.68	2.62	TMEM38A	transmembrane protein 38A [Source:HGNC Symbol;Acc:HGNC:28462]
ENSG00000250748	2.25192	1.17116	4.22352e-11	2.29875e-10	yes	up	1.98667	4.33333	2.07	1.96	1.93	4.03	4.4	4.57	AC025419.1	novel transcript
ENSG00000189212	0.363572	-1.45969	4.22479e-11	2.29883e-10	yes	down	3.58	1.35667	3.95	3.18	3.61	1.07	1.57	1.43	DPY19L2P1	DPY19L2 pseudogene 1 [Source:HGNC Symbol;Acc:HGNC:22305]
ENSG00000179163	2.38248	1.25247	4.76838e-11	2.58911e-10	yes	up	2.67667	6.47667	2.51	2.59	2.93	6.78	6.25	6.4	FUCA1	alpha-L-fucosidase 1 [Source:HGNC Symbol;Acc:HGNC:4006]
ENSG00000167083	0.361683	-1.4672	4.81133e-11	2.61105e-10	yes	down	5.07333	1.78333	5.84	5.01	4.37	1.85	2.2	1.3	GNGT2	G protein subunit gamma transducin 2 [Source:HGNC Symbol;Acc:HGNC:4412]
ENSG00000188818	4.3682	2.12704	4.92977e-11	2.6739e-10	yes	up	0.66	2.7	0.49	1.09	0.4	2.22	2.09	3.79	ZDHHC11	zinc finger DHHC-type containing 11 [Source:HGNC Symbol;Acc:HGNC:19158]
ENSG00000237506	3.24224	1.69699	5.30563e-11	2.87168e-10	yes	up	15.73	50.9733	11.56	18.21	17.42	50.32	56.63	45.97	RPSAP15	ribosomal protein SA pseudogene 15 [Source:HGNC Symbol;Acc:HGNC:31464]
ENSG00000259479	0.460653	-1.11825	5.65179e-11	3.05179e-10	yes	down	10.17	4.55	10.95	9.45	10.11	5.27	4.39	3.99	SORD2P	sorbitol dehydrogenase 2, pseudogene [Source:HGNC Symbol;Acc:HGNC:49919]
ENSG00000247095	10.8539	3.44014	6.08464e-11	3.27773e-10	yes	up	1.13333	7.71	0.44	0.86	2.1	6.62	12.93	3.58	MIR210HG	MIR210 host gene [Source:HGNC Symbol;Acc:HGNC:39524]
ENSG00000080561	2.34528	1.22976	6.22415e-11	3.34936e-10	yes	up	2.83667	6.45667	3.38	2.84	2.29	7.58	6.35	5.44	MID2	midline 2 [Source:HGNC Symbol;Acc:HGNC:7096]
ENSG00000160867	0.241315	-2.05101	6.51315e-11	3.49753e-10	yes	down	2.47333	0.756667	2.6	2.49	2.33	0.53	1.04	0.7	FGFR4	fibroblast growth factor receptor 4 [Source:HGNC Symbol;Acc:HGNC:3691]
ENSG00000285966	9.8149	3.29497	6.7609e-11	3.62677e-10	yes	up	0.143333	1.37667	0.09	0.06	0.28	1.08	1.59	1.46	AC007686.4	novel transcript
ENSG00000264324	3.17619	1.6673	6.92156e-11	3.71198e-10	yes	up	0.54	1.77333	0.61	0.62	0.39	1.86	1.48	1.98	AC006030.1	artifact
ENSG00000182378	0.445899	-1.16521	8.16642e-11	4.36131e-10	yes	down	8.34	3.60667	10.56	8.09	6.37	3.78	4.46	2.58	PLCXD1	phosphatidylinositol specific phospholipase C X domain containing 1 [Source:HGNC Symbol;Acc:HGNC:23148]
ENSG00000115648	0.441845	-1.17839	8.64344e-11	4.60646e-10	yes	down	6.63667	3.38333	6.33	6.53	7.05	3.24	3.1	3.81	MLPH	melanophilin [Source:HGNC Symbol;Acc:HGNC:29643]
ENSG00000113578	0.296881	-1.75205	9.58985e-11	5.08702e-10	yes	down	3.70667	0.796667	4.37	2.99	3.76	0.49	1.04	0.86	FGF1	fibroblast growth factor 1 [Source:HGNC Symbol;Acc:HGNC:3665]
ENSG00000204152	0.499726	-1.00079	9.93451e-11	5.26439e-10	yes	down	12.1867	5.71	14.05	12.59	9.92	6.09	4.11	6.93	TIMM23B	translocase of inner mitochondrial membrane 23 homolog B [Source:HGNC Symbol;Acc:HGNC:23581]
ENSG00000136378	2.02595	1.0186	1.01223e-10	5.36112e-10	yes	up	1.79667	3.65667	1.48	2.11	1.8	3.41	3.44	4.12	ADAMTS7	ADAM metallopeptidase with thrombospondin type 1 motif 7 [Source:HGNC Symbol;Acc:HGNC:223]
ENSG00000145861	0.0723065	-3.78973	1.04631e-10	5.5359e-10	yes	down	1.38333	0.106667	1.23	1.4	1.52	0.18	0.03	0.11	C1QTNF2	C1q and TNF related 2 [Source:HGNC Symbol;Acc:HGNC:14325]
ENSG00000183647	0.426582	-1.22911	1.26178e-10	6.63649e-10	yes	down	5.17	3.08333	4.07	4.08	7.36	3.88	1.77	3.6	ZNF530	zinc finger protein 530 [Source:HGNC Symbol;Acc:HGNC:29297]
ENSG00000273151	2.27693	1.18709	1.32365e-10	6.94939e-10	yes	up	0.813333	1.88333	0.78	0.91	0.75	1.84	1.98	1.83	AC073957.3	novel transcript, antisense to GET4
ENSG00000148814	2.40479	1.26591	1.33175e-10	6.99013e-10	yes	up	3.94	6.97	5.14	2.66	4.02	7.55	6.79	6.57	LRRC27	leucine rich repeat containing 27 [Source:HGNC Symbol;Acc:HGNC:29346]
ENSG00000076555	0.48481	-1.04451	1.33781e-10	7.02016e-10	yes	down	5.56333	2.91333	4.64	7.39	4.66	2.11	4.86	1.77	ACACB	acetyl-CoA carboxylase beta [Source:HGNC Symbol;Acc:HGNC:85]
ENSG00000188112	0.220325	-2.1823	1.42757e-10	7.47583e-10	yes	down	1.14	0.403333	1.25	1.16	1.01	0.59	0.47	0.15	C6orf132	chromosome 6 open reading frame 132 [Source:HGNC Symbol;Acc:HGNC:21288]
ENSG00000130584	2.44847	1.29188	1.47927e-10	7.74064e-10	yes	up	1.15333	2.41667	0.95	1.52	0.99	2.22	2.76	2.27	ZBTB46	zinc finger and BTB domain containing 46 [Source:HGNC Symbol;Acc:HGNC:16094]
ENSG00000198885	0.173914	-2.52355	1.5081e-10	7.88549e-10	yes	down	1.51333	0.433333	1.28	1.88	1.38	0.57	0.31	0.42	ITPRIPL1	ITPRIP like 1 [Source:HGNC Symbol;Acc:HGNC:29371]
ENSG00000274012	2.9176	1.54478	1.53301e-10	8.00753e-10	yes	up	380.347	1116.53	343.94	351.37	445.73	1426.45	970.92	952.23	RN7SL2	RNA, 7SL, cytoplasmic 2 [Source:HGNC Symbol;Acc:HGNC:23134]
ENSG00000103150	2.17938	1.12392	1.62378e-10	8.46655e-10	yes	up	0.616667	1.19	0.61	0.61	0.63	1.28	1.18	1.11	MLYCD	malonyl-CoA decarboxylase [Source:HGNC Symbol;Acc:HGNC:7150]
ENSG00000172687	0.44882	-1.15579	1.73342e-10	9.02445e-10	yes	down	8.67	4.35667	8.85	8.01	9.15	3.25	4.07	5.75	ZNF738	zinc finger protein 738 [Source:HGNC Symbol;Acc:HGNC:32469]
ENSG00000215154	2.15948	1.11068	1.89639e-10	9.85285e-10	yes	up	2.73	6.01667	3.01	2.75	2.43	6.38	5.14	6.53	AC141586.1	potassium channel tetramerisation domain containing 5 (KCTD5) pseudogene
ENSG00000180423	2.23978	1.16335	1.89948e-10	9.8664e-10	yes	up	2.64333	5.22333	3.01	2.93	1.99	4.54	5.26	5.87	HARBI1	harbinger transposase derived 1 [Source:HGNC Symbol;Acc:HGNC:26522]
ENSG00000108556	2.98094	1.57577	1.93714e-10	1.00588e-09	yes	up	0.733333	1.83333	0.75	0.58	0.87	1.59	1.9	2.01	CHRNE	cholinergic receptor nicotinic epsilon subunit [Source:HGNC Symbol;Acc:HGNC:1966]
ENSG00000221869	2.55663	1.35424	2.10044e-10	1.08799e-09	yes	up	2.49	6.43333	2.43	1.99	3.05	5.4	6.17	7.73	CEBPD	CCAAT enhancer binding protein delta [Source:HGNC Symbol;Acc:HGNC:1835]
ENSG00000276418	0.475345	-1.07295	2.13691e-10	1.10632e-09	yes	down	40.1067	19.34	40.33	36	43.99	19.25	18.48	20.29	AC036214.3	novel protein, TPD52-MRPS28 readthrough
ENSG00000267607	40.3989	5.33624	2.16853e-10	1.12184e-09	yes	up	0.0266667	1.02667	0	0.04	0.04	1.52	0.88	0.68	AC011511.5	novel transcript, antisense to ICAM4 and ICAM1
ENSG00000187994	2.84615	1.50901	2.22701e-10	1.15122e-09	yes	up	1.30333	3.50333	1	1.78	1.13	3.48	3.27	3.76	RINL	Ras and Rab interactor like [Source:HGNC Symbol;Acc:HGNC:24795]
ENSG00000125740	2.3604	1.23903	2.31988e-10	1.19741e-09	yes	up	1.63	3.53333	1.55	1.46	1.88	3.39	3.86	3.35	FOSB	FosB proto-oncogene, AP-1 transcription factor subunit [Source:HGNC Symbol;Acc:HGNC:3797]
ENSG00000101311	0.47967	-1.05989	2.60697e-10	1.34289e-09	yes	down	4.12667	2.00667	4.33	4.13	3.92	1.84	1.8	2.38	FERMT1	fermitin family member 1 [Source:HGNC Symbol;Acc:HGNC:15889]
ENSG00000010310	10.3728	3.37473	2.63986e-10	1.35881e-09	yes	up	0.283333	2.27333	0.02	0.19	0.64	2.17	2.82	1.83	GIPR	gastric inhibitory polypeptide receptor [Source:HGNC Symbol;Acc:HGNC:4271]
ENSG00000227908	6.28456	2.65181	2.65429e-10	1.36589e-09	yes	up	0.356667	2.28667	0.49	0.24	0.34	2.26	2.87	1.73	AC016596.1	novel transcript, antisense to IL6ST
ENSG00000164841	0.428105	-1.22396	2.7628e-10	1.42031e-09	yes	down	1.97333	0.853333	1.85	1.82	2.25	0.8	0.96	0.8	TMEM74	transmembrane protein 74 [Source:HGNC Symbol;Acc:HGNC:26409]
ENSG00000235655	0.456734	-1.13057	2.84666e-10	1.46195e-09	yes	down	131.453	61.7933	154.74	130.96	108.66	60.15	50.87	74.36	H3F3AP4	H3 histone, family 3A, pseudogene 4 [Source:HGNC Symbol;Acc:HGNC:42980]
ENSG00000177694	0.200613	-2.31751	2.87484e-10	1.47531e-09	yes	down	4.07667	1.38	2.17	4.05	6.01	0.33	0.3	3.51	NAALADL2	N-acetylated alpha-linked acidic dipeptidase like 2 [Source:HGNC Symbol;Acc:HGNC:23219]
ENSG00000183621	0.477442	-1.0666	2.92724e-10	1.50182e-09	yes	down	5.67	2.97333	6.15	5.65	5.21	3.38	2.4	3.14	ZNF438	zinc finger protein 438 [Source:HGNC Symbol;Acc:HGNC:21029]
ENSG00000198039	0.336711	-1.57042	2.98909e-10	1.53202e-09	yes	down	3.32333	0.986667	2.82	3.11	4.04	0.72	0.89	1.35	ZNF273	zinc finger protein 273 [Source:HGNC Symbol;Acc:HGNC:13067]
ENSG00000224914	2.39603	1.26065	3.19332e-10	1.6318e-09	yes	up	2.59333	6.49333	2.77	3.1	1.91	5.22	6.62	7.64	LINC00863	long intergenic non-protein coding RNA 863 [Source:HGNC Symbol;Acc:HGNC:45162]
ENSG00000156853	0.477928	-1.06513	3.38345e-10	1.72568e-09	yes	down	5.04333	2.63667	5.57	5.22	4.34	2.12	2.44	3.35	ZNF689	zinc finger protein 689 [Source:HGNC Symbol;Acc:HGNC:25173]
ENSG00000198400	5.88127	2.55613	3.43572e-10	1.75012e-09	yes	up	0.486667	3.61667	0.29	0.8	0.37	3.06	3.31	4.48	NTRK1	neurotrophic receptor tyrosine kinase 1 [Source:HGNC Symbol;Acc:HGNC:8031]
ENSG00000170381	0.45875	-1.12422	3.51888e-10	1.79012e-09	yes	down	4.21333	1.72	4.4	4.73	3.51	1.3	2.29	1.57	SEMA3E	semaphorin 3E [Source:HGNC Symbol;Acc:HGNC:10727]
ENSG00000183508	2.18838	1.12986	3.62838e-10	1.84262e-09	yes	up	1.32	2.95333	1.54	1.45	0.97	2.74	3.17	2.95	TENT5C	terminal nucleotidyltransferase 5C [Source:HGNC Symbol;Acc:HGNC:24712]
ENSG00000111859	3.98336	1.99399	3.9303e-10	1.99249e-09	yes	up	0.33	1.29667	0.32	0.38	0.29	1.14	1.48	1.27	NEDD9	neural precursor cell expressed, developmentally down-regulated 9 [Source:HGNC Symbol;Acc:HGNC:7733]
ENSG00000181544	0.369865	-1.43493	4.49953e-10	2.27318e-09	yes	down	3.88	1.40667	4.21	3.69	3.74	1.9	1.14	1.18	FANCB	FA complementation group B [Source:HGNC Symbol;Acc:HGNC:3583]
ENSG00000102057	2.91143	1.54173	4.89172e-10	2.46282e-09	yes	up	0.77	1.94667	0.46	1.12	0.73	1.69	2.44	1.71	KCND1	potassium voltage-gated channel subfamily D member 1 [Source:HGNC Symbol;Acc:HGNC:6237]
ENSG00000246263	2.56601	1.35953	4.96403e-10	2.49799e-09	yes	up	5.99	10.5933	4.6	4.79	8.58	9.16	9.83	12.79	UBR5-AS1	UBR5 antisense RNA 1 [Source:HGNC Symbol;Acc:HGNC:51661]
ENSG00000131634	0.315114	-1.66605	5.38357e-10	2.70247e-09	yes	down	4.43333	1.41667	3.58	4.74	4.98	1.47	1.3	1.48	TMEM204	transmembrane protein 204 [Source:HGNC Symbol;Acc:HGNC:14158]
ENSG00000135407	5.67564	2.50478	5.7443e-10	2.88143e-09	yes	up	0.72	3.85	0.21	0.58	1.37	2.73	2.99	5.83	AVIL	advillin [Source:HGNC Symbol;Acc:HGNC:14188]
ENSG00000111490	0.3204	-1.64205	6.54526e-10	3.27279e-09	yes	down	2.18333	0.786667	2.71	2.18	1.66	0.77	0.75	0.84	TBC1D30	TBC1 domain family member 30 [Source:HGNC Symbol;Acc:HGNC:29164]
ENSG00000271614	6.02577	2.59115	7.44274e-10	3.71249e-09	yes	up	0.196667	1.15	0.09	0.22	0.28	1.08	1.18	1.19	ATP2B1-AS1	ATP2B1 antisense RNA 1 [Source:HGNC Symbol;Acc:HGNC:27883]
ENSG00000196220	4.01381	2.00497	7.71526e-10	3.84281e-09	yes	up	2.01	3.27667	2.08	1.46	2.49	2.65	3.1	4.08	SRGAP3	SLIT-ROBO Rho GTPase activating protein 3 [Source:HGNC Symbol;Acc:HGNC:19744]
ENSG00000136895	0.25795	-1.95484	7.92698e-10	3.94251e-09	yes	down	2.60333	1.31333	2.9	2.49	2.42	2.24	0.55	1.15	GARNL3	GTPase activating Rap/RanGAP domain like 3 [Source:HGNC Symbol;Acc:HGNC:25425]
ENSG00000279821	2.76992	1.46984	8.18365e-10	4.06621e-09	yes	up	1.01333	2.85333	0.96	1.15	0.93	3.1	2.81	2.65	AC145098.2	TEC
ENSG00000196081	0.359646	-1.47535	8.86668e-10	4.3928e-09	yes	down	3.77333	1.36	3.96	3.81	3.55	1.57	1.39	1.12	ZNF724	zinc finger protein 724 [Source:HGNC Symbol;Acc:HGNC:32460]
ENSG00000223855	5.33378	2.41516	9.58005e-10	4.73706e-09	yes	up	0.22	1.22667	0.28	0.26	0.12	1.19	1.29	1.2	AC147651.1	novel transcript
ENSG00000231721	3.0142	1.59178	9.72663e-10	4.80374e-09	yes	up	2.43333	5.87	1.68	2.05	3.57	4.92	5.4	7.29	LINC-PINT	long intergenic non-protein coding RNA, p53 induced transcript [Source:HGNC Symbol;Acc:HGNC:26885]
ENSG00000111335	3.46676	1.79359	1.03492e-09	5.10138e-09	yes	up	0.733333	2.03	0.86	0.9	0.44	2.04	1.63	2.42	OAS2	2'-5'-oligoadenylate synthetase 2 [Source:HGNC Symbol;Acc:HGNC:8087]
ENSG00000049246	0.244024	-2.03491	1.04269e-09	5.1372e-09	yes	down	0.94	0.62	0.93	0.7	1.19	0.42	0.42	1.02	PER3	period circadian regulator 3 [Source:HGNC Symbol;Acc:HGNC:8847]
ENSG00000180998	0.151594	-2.72172	1.04528e-09	5.14624e-09	yes	down	1.09667	0.173333	1	0.84	1.45	0.16	0.14	0.22	GPR137C	G protein-coupled receptor 137C [Source:HGNC Symbol;Acc:HGNC:25445]
ENSG00000115255	2.10352	1.07281	1.09618e-09	5.38908e-09	yes	up	5.97667	12.55	6.38	5.51	6.04	12.95	11.45	13.25	REEP6	receptor accessory protein 6 [Source:HGNC Symbol;Acc:HGNC:30078]
ENSG00000172183	3.01914	1.59414	1.10932e-09	5.44843e-09	yes	up	3.12333	7.14667	2.1	3.45	3.82	7.33	8.11	6	ISG20	interferon stimulated exonuclease gene 20 [Source:HGNC Symbol;Acc:HGNC:6130]
ENSG00000272316	2.19324	1.13306	1.12989e-09	5.54549e-09	yes	up	1.12	2.5	1.1	1.17	1.09	2.18	2.88	2.44	AL021368.2	novel transcript
ENSG00000177045	2.10163	1.07151	1.31333e-09	6.41811e-09	yes	up	3.36	7.34333	2.98	3.2	3.9	7.06	6.31	8.66	SIX5	SIX homeobox 5 [Source:HGNC Symbol;Acc:HGNC:10891]
ENSG00000185862	2.72923	1.44849	1.33745e-09	6.52663e-09	yes	up	1.72333	4.78667	1.93	1.64	1.6	4.44	5.19	4.73	EVI2B	ecotropic viral integration site 2B [Source:HGNC Symbol;Acc:HGNC:3500]
ENSG00000204839	3.31058	1.72708	1.37795e-09	6.71949e-09	yes	up	1.08	3.51667	1	1.14	1.1	4.14	3.21	3.2	MROH6	maestro heat like repeat family member 6 [Source:HGNC Symbol;Acc:HGNC:27814]
ENSG00000140839	14.3319	3.84116	1.42367e-09	6.93418e-09	yes	up	0.106667	2.38667	0.21	0	0.11	1.76	2.52	2.88	CLEC18B	C-type lectin domain family 18 member B [Source:HGNC Symbol;Acc:HGNC:33849]
ENSG00000138271	10.3442	3.37075	1.46238e-09	7.11765e-09	yes	up	0.253333	2.38	0.16	0.06	0.54	1.99	2.37	2.78	GPR87	G protein-coupled receptor 87 [Source:HGNC Symbol;Acc:HGNC:4538]
ENSG00000116701	4.03555	2.01276	1.57514e-09	7.64467e-09	yes	up	1.02667	5.77333	1.31	1.15	0.62	5.15	5.41	6.76	NCF2	neutrophil cytosolic factor 2 [Source:HGNC Symbol;Acc:HGNC:7661]
ENSG00000159239	2.70919	1.43786	1.64125e-09	7.95987e-09	yes	up	0.6	1.65	0.56	0.56	0.68	1.82	1.56	1.57	AC005041.1	novel transcript
ENSG00000124787	0.471068	-1.08599	1.65883e-09	8.04128e-09	yes	down	16.5733	8.08667	17.11	16.24	16.37	7.25	8.75	8.26	RPP40	ribonuclease P/MRP subunit p40 [Source:HGNC Symbol;Acc:HGNC:20992]
ENSG00000279686	0.3616	-1.46754	1.78696e-09	8.64572e-09	yes	down	10.1933	3.72333	10.45	9.77	10.36	3.54	4.03	3.6	AC142391.1	novel transcript
ENSG00000213467	0.314994	-1.6666	1.78808e-09	8.64741e-09	yes	down	17.8367	5.72333	16.64	17.42	19.45	6.07	5.53	5.57	HMGB1P37	high mobility group box 1 pseudogene 37 [Source:HGNC Symbol;Acc:HGNC:39184]
ENSG00000137460	3.10717	1.6356	1.84517e-09	8.90873e-09	yes	up	0.346667	1.10333	0.33	0.38	0.33	1.36	1.03	0.92	FHDC1	FH2 domain containing 1 [Source:HGNC Symbol;Acc:HGNC:29363]
ENSG00000182985	2.1107	1.07772	1.98272e-09	9.55484e-09	yes	up	2.81667	4.24333	1.58	3.31	3.56	4.07	4	4.66	CADM1	cell adhesion molecule 1 [Source:HGNC Symbol;Acc:HGNC:5951]
ENSG00000135362	0.429934	-1.21781	2.13934e-09	1.02878e-08	yes	down	6.73667	3.36	6.45	7.68	6.08	4.19	2.01	3.88	PRR5L	proline rich 5 like [Source:HGNC Symbol;Acc:HGNC:25878]
ENSG00000225377	2.64744	1.4046	2.19485e-09	1.05374e-08	yes	up	1.80667	5.67	2.31	1.7	1.41	6.23	5.48	5.3	NRSN2-AS1	NRSN2 antisense RNA 1 [Source:HGNC Symbol;Acc:HGNC:51222]
ENSG00000133321	3.26541	1.70727	2.25376e-09	1.08127e-08	yes	up	4.06667	13.59	4.31	2.91	4.98	12.37	15.05	13.35	RARRES3	retinoic acid receptor responder 3 [Source:HGNC Symbol;Acc:HGNC:9869]
ENSG00000121966	2.95119	1.5613	2.27656e-09	1.09195e-08	yes	up	1.83333	5.44333	1.6	1.58	2.32	4.48	6.26	5.59	CXCR4	C-X-C motif chemokine receptor 4 [Source:HGNC Symbol;Acc:HGNC:2561]
ENSG00000106268	0.463456	-1.1095	2.33612e-09	1.11947e-08	yes	down	36.6567	17.0533	35.67	38.66	35.64	21.37	17.02	12.77	NUDT1	nudix hydrolase 1 [Source:HGNC Symbol;Acc:HGNC:8048]
ENSG00000214783	2.09202	1.0649	2.47864e-09	1.18555e-08	yes	up	2.77333	4.36667	2.54	3.2	2.58	4.37	4.34	4.39	POLR2J4	RNA polymerase II subunit J4, pseudogene [Source:HGNC Symbol;Acc:HGNC:28195]
ENSG00000156140	0.481136	-1.05548	2.48086e-09	1.18633e-08	yes	down	2.60667	1.24667	2.83	2.4	2.59	1.03	1.5	1.21	ADAMTS3	ADAM metallopeptidase with thrombospondin type 1 motif 3 [Source:HGNC Symbol;Acc:HGNC:219]
ENSG00000139537	2.25394	1.17245	2.56443e-09	1.22515e-08	yes	up	1.37333	3.46667	1.29	1.67	1.16	4.18	3.38	2.84	CCDC65	coiled-coil domain containing 65 [Source:HGNC Symbol;Acc:HGNC:29937]
ENSG00000267123	3.46654	1.7935	2.68219e-09	1.27962e-08	yes	up	1.70333	6.14	2.02	1.55	1.54	4.73	6.54	7.15	SCAT1	S-phase cancer associated transcript 1 [Source:HGNC Symbol;Acc:HGNC:52930]
ENSG00000162062	0.28526	-1.80965	2.93868e-09	1.39678e-08	yes	down	4.17333	1.78667	4.58	4.71	3.23	2.99	1	1.37	TEDC2	tubulin epsilon and delta complex 2 [Source:HGNC Symbol;Acc:HGNC:25849]
ENSG00000165507	33.2001	5.05311	3.2076e-09	1.51896e-08	yes	up	0.0466667	1.35	0.1	0	0.04	1.68	1.04	1.33	DEPP1	DEPP1, autophagy regulator [Source:HGNC Symbol;Acc:HGNC:23355]
ENSG00000260276	4.7266	2.2408	3.23697e-09	1.5318e-08	yes	up	1.58	8.53	1.37	1.84	1.53	6.43	9.8	9.36	AC022167.2	novel transcript, antisense to CARHSP1
ENSG00000204219	2.16206	1.11241	3.26744e-09	1.54551e-08	yes	up	4.06667	8.37	3.62	4.26	4.32	8.5	8.01	8.6	TCEA3	transcription elongation factor A3 [Source:HGNC Symbol;Acc:HGNC:11615]
ENSG00000145536	0.493523	-1.01881	3.31194e-09	1.56583e-08	yes	down	4.48333	1.9	4.81	4.34	4.3	2.21	1.82	1.67	ADAMTS16	ADAM metallopeptidase with thrombospondin type 1 motif 16 [Source:HGNC Symbol;Acc:HGNC:17108]
ENSG00000176046	3.54282	1.8249	3.31843e-09	1.56818e-08	yes	up	1.38333	4.78333	1.15	1.72	1.28	3.75	6.61	3.99	NUPR1	nuclear protein 1, transcriptional regulator [Source:HGNC Symbol;Acc:HGNC:29990]
ENSG00000184923	2.34615	1.2303	3.7387e-09	1.76231e-08	yes	up	1.59333	3.71333	1.38	1.42	1.98	3.99	3.17	3.98	NUTM2A	NUT family member 2A [Source:HGNC Symbol;Acc:HGNC:23438]
ENSG00000198521	0.489119	-1.03174	3.80464e-09	1.79215e-08	yes	down	4.42	2.37333	4.79	4.26	4.21	2.55	2.76	1.81	ZNF43	zinc finger protein 43 [Source:HGNC Symbol;Acc:HGNC:13109]
ENSG00000184937	0.366821	-1.44685	3.88524e-09	1.82928e-08	yes	down	4.07333	1.56667	4.27	3.81	4.14	1.64	1.29	1.77	WT1	Wilms tumor 1 [Source:HGNC Symbol;Acc:HGNC:12796]
ENSG00000125650	3.97324	1.99032	4.28532e-09	2.01071e-08	yes	up	0.383333	1.55333	0.4	0.37	0.38	0.96	1.99	1.71	PSPN	persephin [Source:HGNC Symbol;Acc:HGNC:9579]
ENSG00000233818	2.27967	1.18882	4.32486e-09	2.0288e-08	yes	up	7.26	14.8667	7.25	4.8	9.73	16.4	14.21	13.99	AP000695.2	novel transcript
ENSG00000213199	13.6967	3.77576	4.4459e-09	2.08319e-08	yes	up	0.296667	2.45333	0	0.66	0.23	3.69	2.13	1.54	ASIC3	acid sensing ion channel subunit 3 [Source:HGNC Symbol;Acc:HGNC:101]
ENSG00000174428	2.49535	1.31924	4.57745e-09	2.14337e-08	yes	up	2.39	5.22667	2.12	2.58	2.47	4.34	5.35	5.99	GTF2IRD2B	GTF2I repeat domain containing 2B [Source:HGNC Symbol;Acc:HGNC:33125]
ENSG00000089847	9.14965	3.19372	5.03076e-09	2.35079e-08	yes	up	0.09	0.84	0.11	0.07	0.09	0.95	0.67	0.9	ANKRD24	ankyrin repeat domain 24 [Source:HGNC Symbol;Acc:HGNC:29424]
ENSG00000272196	2.7209	1.44408	5.1109e-09	2.38606e-08	yes	up	12.79	35.9933	18.16	10.71	9.5	31.65	35.31	41.02	HIST2H2AA4	histone cluster 2 H2A family member a4 [Source:HGNC Symbol;Acc:HGNC:29668]
ENSG00000135617	0.470052	-1.08911	5.1525e-09	2.40493e-08	yes	down	15.3467	7.33667	17.5	14.71	13.83	7.88	7.24	6.89	PRADC1	protease associated domain containing 1 [Source:HGNC Symbol;Acc:HGNC:16047]
ENSG00000223839	0.359857	-1.47451	5.1927e-09	2.42259e-08	yes	down	1.95667	1.18	1.72	2.24	1.91	1.09	1	1.45	FAM95B1	family with sequence similarity 95 member B1 [Source:HGNC Symbol;Acc:HGNC:32318]
ENSG00000258749	0.250016	-1.99991	5.63595e-09	2.6228e-08	yes	down	8.33667	2.15333	10.57	8.83	5.61	1.85	2.32	2.29	AL110504.1	novel transcript, antisense to CCDC85C
ENSG00000265817	0.340507	-1.55425	5.82168e-09	2.70372e-08	yes	down	3.01333	0.836667	4.07	3.7	1.27	0.6	1.03	0.88	FSBP	fibrinogen silencer binding protein [Source:HGNC Symbol;Acc:HGNC:43653]
ENSG00000106333	0.380686	-1.39332	6.1394e-09	2.84546e-08	yes	down	10.8033	5.35	11.3	11.05	10.06	6.29	4.31	5.45	PCOLCE	procollagen C-endopeptidase enhancer [Source:HGNC Symbol;Acc:HGNC:8738]
ENSG00000257219	2.53488	1.34192	6.30204e-09	2.91754e-08	yes	up	6.49667	16.18	6.68	5.67	7.14	16.34	15.35	16.85	LNCOG	lncRNA osteogenesis associated [Source:HGNC Symbol;Acc:HGNC:53336]
ENSG00000108379	0.444128	-1.17095	6.42054e-09	2.96972e-08	yes	down	3.08333	1.33	3.02	3.2	3.03	1.32	1.23	1.44	WNT3	Wnt family member 3 [Source:HGNC Symbol;Acc:HGNC:12782]
ENSG00000101280	3.86049	1.94879	6.42631e-09	2.97133e-08	yes	up	1.81667	7.83	1.17	1.61	2.67	8.07	7.59	7.83	ANGPT4	angiopoietin 4 [Source:HGNC Symbol;Acc:HGNC:487]
ENSG00000285830	2.79525	1.48298	6.83776e-09	3.15486e-08	yes	up	1.00333	2.88333	1.11	1.19	0.71	3.42	2.83	2.4	AL109628.2	novel transcript, antisense to TRAPPC6B
ENSG00000112039	0.475024	-1.07393	6.84941e-09	3.15952e-08	yes	down	6.02667	2.92667	6.48	5.3	6.3	2.31	3.19	3.28	FANCE	FA complementation group E [Source:HGNC Symbol;Acc:HGNC:3586]
ENSG00000183876	0.220728	-2.17966	7.25873e-09	3.34532e-08	yes	down	1.62667	0.393333	1.5	1.65	1.73	0.31	0.52	0.35	ARSI	arylsulfatase family member I [Source:HGNC Symbol;Acc:HGNC:32521]
ENSG00000228242	2.46024	1.2988	7.44497e-09	3.4273e-08	yes	up	6.48667	15.47	6.44	5.89	7.13	15.29	15.58	15.54	AC093495.1	novel transcript, antisense to XPC
ENSG00000133863	0.248347	-2.00957	7.73911e-09	3.55551e-08	yes	down	0.493333	0.126667	0.57	0.5	0.41	0.18	0.08	0.12	TEX15	testis expressed 15, meiosis and synapsis associated [Source:HGNC Symbol;Acc:HGNC:11738]
ENSG00000166793	5.7415	2.52143	7.7491e-09	3.5593e-08	yes	up	0.31	2.02667	0.31	0.35	0.27	2.37	1.63	2.08	YPEL4	yippee like 4 [Source:HGNC Symbol;Acc:HGNC:18328]
ENSG00000221955	2.26436	1.17911	8.48057e-09	3.88918e-08	yes	up	1.97	4.87333	1.72	1.84	2.35	4.95	4.47	5.2	SLC12A8	solute carrier family 12 member 8 [Source:HGNC Symbol;Acc:HGNC:15595]
ENSG00000122547	0.332256	-1.58963	9.49763e-09	4.34005e-08	yes	down	2.74333	1.68667	3.22	2.95	2.06	1.61	2.88	0.57	EEPD1	endonuclease/exonuclease/phosphatase family domain containing 1 [Source:HGNC Symbol;Acc:HGNC:22223]
ENSG00000232653	2.16871	1.11684	9.63081e-09	4.39698e-08	yes	up	1.10667	2.82667	0.97	1.13	1.22	2.33	2.58	3.57	GOLGA8N	golgin A8 family member N [Source:HGNC Symbol;Acc:HGNC:44405]
ENSG00000260912	2.88248	1.52731	9.64752e-09	4.40265e-08	yes	up	1.43333	4.19667	1.42	1.37	1.51	4.72	4.68	3.19	AL158206.1	novel transcript, overlapping ACER2
ENSG00000197852	2.03909	1.02792	9.70861e-09	4.42855e-08	yes	up	1.23333	2.71667	1.47	1.25	0.98	2.28	3.79	2.08	INKA2	inka box actin regulator 2 [Source:HGNC Symbol;Acc:HGNC:28045]
ENSG00000226029	6.35822	2.66862	9.94159e-09	4.53079e-08	yes	up	0.16	1.03	0.15	0.19	0.14	0.8	1.09	1.2	LINC01772	long intergenic non-protein coding RNA 1772 [Source:HGNC Symbol;Acc:HGNC:52562]
ENSG00000159788	0.494378	-1.01631	1.01151e-08	4.60579e-08	yes	down	5.81333	3.2	9.3	3.77	4.37	3.71	3.04	2.85	RGS12	regulator of G protein signaling 12 [Source:HGNC Symbol;Acc:HGNC:9994]
ENSG00000061656	2.35872	1.238	1.03192e-08	4.69555e-08	yes	up	5.38667	12.9933	4.76	5.91	5.49	12.41	15.43	11.14	SPAG4	sperm associated antigen 4 [Source:HGNC Symbol;Acc:HGNC:11214]
ENSG00000129422	0.379519	-1.39776	1.06535e-08	4.84446e-08	yes	down	1.78333	0.853333	2.24	1.49	1.62	0.82	1.14	0.6	MTUS1	microtubule associated scaffold protein 1 [Source:HGNC Symbol;Acc:HGNC:29789]
ENSG00000134548	2.91675	1.54436	1.11022e-08	5.0429e-08	yes	up	1.12667	3.12667	1.12	1.28	0.98	2.9	3.27	3.21	SPX	spexin hormone [Source:HGNC Symbol;Acc:HGNC:28139]
ENSG00000260542	29.0913	4.86251	1.3323e-08	6.02227e-08	yes	up	0.0366667	1.11667	0.05	0.03	0.03	0.97	1.18	1.2	AL499627.1	novel transcript
ENSG00000204792	0.23622	-2.0818	1.34579e-08	6.08188e-08	yes	down	0.643333	0.403333	0.56	0.83	0.54	0.09	0.27	0.85	LINC01291	long intergenic non-protein coding RNA 1291 [Source:HGNC Symbol;Acc:HGNC:50358]
ENSG00000198208	0.408313	-1.29225	1.34779e-08	6.08958e-08	yes	down	6.24333	2.75333	6.75	6.43	5.55	1.59	2.79	3.88	RPS6KL1	ribosomal protein S6 kinase like 1 [Source:HGNC Symbol;Acc:HGNC:20222]
ENSG00000125735	22.7943	4.5106	1.36329e-08	6.15689e-08	yes	up	0.03	0.763333	0.05	0.01	0.03	0.57	0.98	0.74	TNFSF14	TNF superfamily member 14 [Source:HGNC Symbol;Acc:HGNC:11930]
ENSG00000101986	2.08832	1.06235	1.37243e-08	6.19409e-08	yes	up	2.3	3.98	1.94	2.77	2.19	4.83	3.41	3.7	ABCD1	ATP binding cassette subfamily D member 1 [Source:HGNC Symbol;Acc:HGNC:61]
ENSG00000137561	0.300565	-1.73425	1.3853e-08	6.24529e-08	yes	down	4.98333	1.32333	3.01	6.17	5.77	0.6	1.85	1.52	TTPA	alpha tocopherol transfer protein [Source:HGNC Symbol;Acc:HGNC:12404]
ENSG00000164010	0.430649	-1.21541	1.42059e-08	6.39875e-08	yes	down	3.56	1.50333	3.33	3.56	3.79	2.11	0.99	1.41	ERMAP	erythroblast membrane associated protein (Scianna blood group) [Source:HGNC Symbol;Acc:HGNC:15743]
ENSG00000138311	0.3102	-1.68873	1.44101e-08	6.48788e-08	yes	down	1.62667	0.496667	1.66	1.52	1.7	0.37	0.54	0.58	ZNF365	zinc finger protein 365 [Source:HGNC Symbol;Acc:HGNC:18194]
ENSG00000197496	3.28573	1.71621	1.49145e-08	6.71202e-08	yes	up	0.436667	1.55667	0.51	0.52	0.28	1.27	1.54	1.86	SLC2A10	solute carrier family 2 member 10 [Source:HGNC Symbol;Acc:HGNC:13444]
ENSG00000280206	0.278225	-1.84568	1.71838e-08	7.68265e-08	yes	down	7.64667	2.17667	8.29	7.68	6.97	2.64	1.76	2.13	AC026401.3	novel transcript
ENSG00000226688	0.426709	-1.22868	1.74113e-08	7.78264e-08	yes	down	13.59	5.74667	15.61	12.79	12.37	4.8	6.13	6.31	ENTPD1-AS1	ENTPD1 antisense RNA 1 [Source:HGNC Symbol;Acc:HGNC:45203]
ENSG00000286177	2.67391	1.41895	1.7717e-08	7.91413e-08	yes	up	1.13667	3.07	0.83	1.37	1.21	2.68	3.47	3.06	AC011462.6	novel transcript, antisense to CCDC97 and HNRNPUL1
ENSG00000183691	2.77184	1.47084	1.90134e-08	8.47656e-08	yes	up	1.44333	4.05	1.28	1.4	1.65	4.25	3.67	4.23	NOG	noggin [Source:HGNC Symbol;Acc:HGNC:7866]
ENSG00000220412	3.87571	1.95446	1.91845e-08	8.54728e-08	yes	up	0.796667	3.09667	0.54	0.77	1.08	2.67	3.04	3.58	AL356234.1	protein tyrosine phosphatase, non-receptor type 11 (PTPN11) pseudogene
ENSG00000133083	0.388133	-1.36538	1.97422e-08	8.78044e-08	yes	down	2.13333	0.643333	1.73	1.61	3.06	0.55	0.68	0.7	DCLK1	doublecortin like kinase 1 [Source:HGNC Symbol;Acc:HGNC:2700]
ENSG00000123685	0.290657	-1.78261	2.14008e-08	9.49956e-08	yes	down	7.76667	1.86667	7.68	8.34	7.28	2.11	1.47	2.02	BATF3	basic leucine zipper ATF-like transcription factor 3 [Source:HGNC Symbol;Acc:HGNC:28915]
ENSG00000152056	0.306263	-1.70716	2.20973e-08	9.80025e-08	yes	down	4.86	1.47	6.67	3.27	4.64	1.41	1.8	1.2	AP1S3	adaptor related protein complex 1 subunit sigma 3 [Source:HGNC Symbol;Acc:HGNC:18971]
ENSG00000233695	2.91151	1.54177	2.28872e-08	1.01396e-07	yes	up	0.356667	0.983333	0.38	0.42	0.27	1.19	0.79	0.97	GAS6-AS1	GAS6 antisense RNA 1 [Source:HGNC Symbol;Acc:HGNC:39826]
ENSG00000141655	0.408889	-1.29022	2.38177e-08	1.05313e-07	yes	down	1.92	0.923333	2.16	1.94	1.66	0.44	1.13	1.2	TNFRSF11A	TNF receptor superfamily member 11a [Source:HGNC Symbol;Acc:HGNC:11908]
ENSG00000071282	0.20617	-2.27809	2.51569e-08	1.11091e-07	yes	down	3.88667	1.23333	4.46	2.8	4.4	2.56	0.49	0.65	LMCD1	LIM and cysteine rich domains 1 [Source:HGNC Symbol;Acc:HGNC:6633]
ENSG00000107968	2.24323	1.16558	2.53496e-08	1.11893e-07	yes	up	2.73667	5.36	2.83	3.54	1.84	5.04	5.98	5.06	MAP3K8	mitogen-activated protein kinase kinase kinase 8 [Source:HGNC Symbol;Acc:HGNC:6860]
ENSG00000173894	0.383453	-1.38288	2.70271e-08	1.18913e-07	yes	down	1.98	0.76	2.34	2	1.6	0.92	0.82	0.54	CBX2	chromobox 2 [Source:HGNC Symbol;Acc:HGNC:1552]
ENSG00000159231	0.38678	-1.37042	2.71773e-08	1.19497e-07	yes	down	11.0833	4.36	12.51	9.3	11.44	3.59	4.13	5.36	CBR3	carbonyl reductase 3 [Source:HGNC Symbol;Acc:HGNC:1549]
ENSG00000012171	2.92392	1.5479	2.76259e-08	1.21391e-07	yes	up	0.93	3.07667	0.75	1.02	1.02	2.87	2.47	3.89	SEMA3B	semaphorin 3B [Source:HGNC Symbol;Acc:HGNC:10724]
ENSG00000258674	2.07259	1.05143	3.0989e-08	1.35849e-07	yes	up	3.95333	6.35667	3.91	3.54	4.41	7.29	4.11	7.67	AC011448.1	readthrough between NDUFA13 and YJEFN3
ENSG00000133687	2.1924	1.13251	3.17016e-08	1.38854e-07	yes	up	0.84	1.65	0.74	0.94	0.84	1.45	1.97	1.53	TMTC1	transmembrane and tetratricopeptide repeat containing 1 [Source:HGNC Symbol;Acc:HGNC:24099]
ENSG00000262576	2.98212	1.57634	3.24425e-08	1.41947e-07	yes	up	0.573333	1.73	0.72	0.3	0.7	1.65	1.6	1.94	PCDHGA4	protocadherin gamma subfamily A, 4 [Source:HGNC Symbol;Acc:HGNC:8702]
ENSG00000106804	0.161919	-2.62666	3.30336e-08	1.44441e-07	yes	down	0.79	0.34	0.75	0.73	0.89	0.04	0.41	0.57	C5	complement C5 [Source:HGNC Symbol;Acc:HGNC:1331]
ENSG00000113504	2.37619	1.24865	3.31951e-08	1.45116e-07	yes	up	1.12	2.38667	0.99	1.3	1.07	3.26	1.78	2.12	SLC12A7	solute carrier family 12 member 7 [Source:HGNC Symbol;Acc:HGNC:10915]
ENSG00000128271	4.8671	2.28306	3.37637e-08	1.4757e-07	yes	up	0.443333	2.34667	0.22	0.57	0.54	2.05	3.27	1.72	ADORA2A	adenosine A2a receptor [Source:HGNC Symbol;Acc:HGNC:263]
ENSG00000111261	0.450161	-1.15149	3.43215e-08	1.49976e-07	yes	down	4.34333	2.40667	4.2	4.19	4.64	2.57	2.2	2.45	MANSC1	MANSC domain containing 1 [Source:HGNC Symbol;Acc:HGNC:25505]
ENSG00000130775	2.78073	1.47546	3.472e-08	1.51588e-07	yes	up	1.39333	3.78333	1.31	1.39	1.48	4.01	3.6	3.74	THEMIS2	thymocyte selection associated family member 2 [Source:HGNC Symbol;Acc:HGNC:16839]
ENSG00000214106	2.03452	1.02469	3.55055e-08	1.54787e-07	yes	up	1.53333	2.82667	1.48	1.75	1.37	3.12	2.45	2.91	PAXIP1-AS2	PAXIP1 antisense RNA 2 [Source:HGNC Symbol;Acc:HGNC:48958]
ENSG00000071243	0.486291	-1.04011	3.57143e-08	1.55631e-07	yes	down	8.5	4.04667	9.72	6.93	8.85	4.98	3.8	3.36	ING3	inhibitor of growth family member 3 [Source:HGNC Symbol;Acc:HGNC:14587]
ENSG00000112309	2.06582	1.04672	3.63846e-08	1.58484e-07	yes	up	4.13333	8.63333	4.5	2.93	4.97	9.53	8.76	7.61	B3GAT2	beta-1,3-glucuronyltransferase 2 [Source:HGNC Symbol;Acc:HGNC:922]
ENSG00000151611	2.06845	1.04855	3.75084e-08	1.63287e-07	yes	up	2.51	4.88667	2.17	2.89	2.47	4.61	4.25	5.8	MMAA	metabolism of cobalamin associated A [Source:HGNC Symbol;Acc:HGNC:18871]
ENSG00000144214	11.0636	3.46775	3.75191e-08	1.63287e-07	yes	up	0.27	3.10333	0.2	0.52	0.09	3.02	2.83	3.46	LYG1	lysozyme g1 [Source:HGNC Symbol;Acc:HGNC:27014]
ENSG00000242474	0.348554	-1.52055	3.96019e-08	1.72023e-07	yes	down	5.49	2.31333	6.56	5.03	4.88	2.01	2.39	2.54	AC093627.5	novel transcript
ENSG00000164344	2.35633	1.23654	4.25156e-08	1.84171e-07	yes	up	0.603333	1.23	0.44	0.56	0.81	1.31	0.97	1.41	KLKB1	kallikrein B1 [Source:HGNC Symbol;Acc:HGNC:6371]
ENSG00000137496	2.14351	1.09997	4.38062e-08	1.89482e-07	yes	up	1.69333	4.40333	1.79	1.7	1.59	4.47	4.4	4.34	IL18BP	interleukin 18 binding protein [Source:HGNC Symbol;Acc:HGNC:5987]
ENSG00000157578	4.55169	2.1864	4.65956e-08	2.01164e-07	yes	up	0.673333	2.51	1.14	0.43	0.45	3.32	1.93	2.28	LCA5L	LCA5L, lebercilin like [Source:HGNC Symbol;Acc:HGNC:1255]
ENSG00000162745	0.228061	-2.13251	4.82733e-08	2.08144e-07	yes	down	1.74333	0.31	1.03	1.99	2.21	0.33	0.29	0.31	OLFML2B	olfactomedin like 2B [Source:HGNC Symbol;Acc:HGNC:24558]
ENSG00000269386	4.20968	2.07371	4.88678e-08	2.10663e-07	yes	up	1.13667	5.25333	0.89	1.44	1.08	4.51	4.98	6.27	RAB11B-AS1	RAB11B antisense RNA 1 [Source:HGNC Symbol;Acc:HGNC:44178]
ENSG00000124212	0.0634662	-3.97787	5.17163e-08	2.22709e-07	yes	down	0.606667	0.0466667	0.65	0.5	0.67	0	0.04	0.1	PTGIS	prostaglandin I2 synthase [Source:HGNC Symbol;Acc:HGNC:9603]
ENSG00000214894	5.15762	2.36671	5.28317e-08	2.27368e-07	yes	up	0.69	3.84	0.65	1	0.42	4.93	2.67	3.92	LINC00243	long intergenic non-protein coding RNA 243 [Source:HGNC Symbol;Acc:HGNC:30956]
ENSG00000179148	2.42615	1.27867	5.32535e-08	2.29087e-07	yes	up	1.82333	6.77333	1.83	2.35	1.29	5.82	6.81	7.69	ALOXE3	arachidonate lipoxygenase 3 [Source:HGNC Symbol;Acc:HGNC:13743]
ENSG00000256673	0.465625	-1.10276	5.46761e-08	2.35059e-07	yes	down	4.14667	1.96333	4.05	4.48	3.91	1.99	1.77	2.13	AC141557.1	ovostatin (OVOS) pseudogene
ENSG00000261474	2.32232	1.21556	5.75043e-08	2.46959e-07	yes	up	0.44	1.03667	0.4	0.5	0.42	1.19	0.96	0.96	AC026471.4	novel transcript
ENSG00000176894	0.462806	-1.11152	5.83135e-08	2.50329e-07	yes	down	15.6867	7.68	15.2	15.07	16.79	7.75	7.72	7.57	PXMP2	peroxisomal membrane protein 2 [Source:HGNC Symbol;Acc:HGNC:9716]
ENSG00000270607	2.02191	1.01572	6.18567e-08	2.6515e-07	yes	up	5.13667	10.4867	3.94	5.05	6.42	9.99	11.68	9.79	AC009549.1	novel transcript
ENSG00000187609	2.17568	1.12147	6.31665e-08	2.70199e-07	yes	up	4.28333	11.12	4.57	4.98	3.3	10.48	10.55	12.33	EXD3	exonuclease 3'-5' domain containing 3 [Source:HGNC Symbol;Acc:HGNC:26023]
ENSG00000269190	0.432744	-1.20842	6.58756e-08	2.81611e-07	yes	down	6.00333	2.20333	5.97	5.74	6.3	2.21	2.83	1.57	FBXO17	F-box protein 17 [Source:HGNC Symbol;Acc:HGNC:18754]
ENSG00000243244	0.455645	-1.13402	6.83587e-08	2.92043e-07	yes	down	1.81667	0.873333	1.82	1.75	1.88	1	0.8	0.82	STON1	stonin 1 [Source:HGNC Symbol;Acc:HGNC:17003]
ENSG00000174327	2.09498	1.06693	6.90873e-08	2.9491e-07	yes	up	3.39333	6.99	3	3.11	4.07	6.62	6.96	7.39	SLC16A13	solute carrier family 16 member 13 [Source:HGNC Symbol;Acc:HGNC:31037]
ENSG00000151876	0.469123	-1.09196	7.13605e-08	3.04296e-07	yes	down	7.42667	4.03	7.44	7.32	7.52	4.18	4.09	3.82	FBXO4	F-box protein 4 [Source:HGNC Symbol;Acc:HGNC:13583]
ENSG00000230453	0.469727	-1.09011	7.18784e-08	3.06377e-07	yes	down	3.7	1.97333	4.02	4.32	2.76	3.3	1.42	1.2	ANKRD18B	ankyrin repeat domain 18B [Source:HGNC Symbol;Acc:HGNC:23644]
ENSG00000105851	0.45256	-1.14382	7.27712e-08	3.09924e-07	yes	down	2.07	0.97	1.86	2.2	2.15	0.66	1.54	0.71	PIK3CG	phosphatidylinositol-4,5-bisphosphate 3-kinase catalytic subunit gamma [Source:HGNC Symbol;Acc:HGNC:8978]
ENSG00000142765	3.07778	1.62189	7.42739e-08	3.16193e-07	yes	up	1.18667	3.48333	0.84	1.32	1.4	3.18	3.83	3.44	SYTL1	synaptotagmin like 1 [Source:HGNC Symbol;Acc:HGNC:15584]
ENSG00000074047	0.182807	-2.45161	7.60334e-08	3.23482e-07	yes	down	0.823333	0.436667	0.75	0.67	1.05	0.13	0.13	1.05	GLI2	GLI family zinc finger 2 [Source:HGNC Symbol;Acc:HGNC:4318]
ENSG00000260428	5.4757	2.45304	8.1102e-08	3.44331e-07	yes	up	0.77	4.13333	0.23	0.9	1.18	3.37	4.71	4.32	SCX	scleraxis bHLH transcription factor [Source:HGNC Symbol;Acc:HGNC:32322]
ENSG00000265303	0.345868	-1.53171	8.30696e-08	3.52319e-07	yes	down	7.76	2.44333	10.24	6.88	6.16	2.24	2.25	2.84	AC099850.2	novel protein
ENSG00000091129	2.13932	1.09715	8.46759e-08	3.58983e-07	yes	up	1.43333	2.85667	1.23	1.37	1.7	2.37	2.4	3.8	NRCAM	neuronal cell adhesion molecule [Source:HGNC Symbol;Acc:HGNC:7994]
ENSG00000078053	0.37944	-1.39806	8.58301e-08	3.63726e-07	yes	down	2.59333	0.88	2.65	2.6	2.53	0.73	0.91	1	AMPH	amphiphysin [Source:HGNC Symbol;Acc:HGNC:471]
ENSG00000143369	0.362217	-1.46507	8.65107e-08	3.66382e-07	yes	down	3.54333	1.24	4.34	3.6	2.69	1.22	1.3	1.2	ECM1	extracellular matrix protein 1 [Source:HGNC Symbol;Acc:HGNC:3153]
ENSG00000253174	0.0752174	-3.73279	8.70669e-08	3.68662e-07	yes	down	4.68333	0.416667	1.67	3.8	8.58	0.76	0.24	0.25	AC009630.2	novel transcript, antisense to GINS4
ENSG00000247400	2.14525	1.10115	8.8512e-08	3.74471e-07	yes	up	1.62333	3.54	1.66	1.62	1.59	3.24	3.63	3.75	DNAJC3-DT	DNAJC3 divergent transcript [Source:HGNC Symbol;Acc:HGNC:39808]
ENSG00000104983	0.460015	-1.12025	9.02685e-08	3.81429e-07	yes	down	9.22	3.68667	10.8	9.05	7.81	3.5	4.36	3.2	CCDC61	coiled-coil domain containing 61 [Source:HGNC Symbol;Acc:HGNC:33629]
ENSG00000255339	3.00569	1.5877	9.30421e-08	3.92663e-07	yes	up	2.16667	7.44667	2.28	2.79	1.43	8.13	6.52	7.69	AL133352.1	NADH dehydrogenase (ubiquinone) 1 beta subcomplex, 8, 19kDa (NDUFB8) and SEC31 homolog B (S. cerevisiae) (SEC31B) readthrough
ENSG00000215424	0.404379	-1.30622	9.50335e-08	4.00572e-07	yes	down	4.67667	1.94333	5.89	4.03	4.11	2.23	1.68	1.92	MCM3AP-AS1	MCM3AP antisense RNA 1 [Source:HGNC Symbol;Acc:HGNC:16417]
ENSG00000086991	0.153647	-2.70231	1.02243e-07	4.2928e-07	yes	down	1.81	0.316667	1.51	1.76	2.16	0.26	0.33	0.36	NOX4	NADPH oxidase 4 [Source:HGNC Symbol;Acc:HGNC:7891]
ENSG00000121361	0.243673	-2.03698	1.02526e-07	4.30383e-07	yes	down	1.81333	0.743333	1.99	1.75	1.7	1.22	0.59	0.42	KCNJ8	potassium voltage-gated channel subfamily J member 8 [Source:HGNC Symbol;Acc:HGNC:6269]
ENSG00000176533	36.5403	5.19142	1.04681e-07	4.38979e-07	yes	up	0.01	0.553333	0.02	0.01	0	0.38	0.47	0.81	GNG7	G protein subunit gamma 7 [Source:HGNC Symbol;Acc:HGNC:4410]
ENSG00000277117	5.13143	2.35936	1.05268e-07	4.41348e-07	yes	up	0.286667	1.04333	0.4	0.23	0.23	0.79	1.15	1.19	FP565260.3	Homo sapiens ICOS ligand (LOC102723996), mRNA. [Source:RefSeq mRNA;Acc:NM_001363770]
ENSG00000106003	0.270741	-1.88501	1.06227e-07	4.44735e-07	yes	down	2.63667	0.62	2.76	2.74	2.41	0.52	0.74	0.6	LFNG	LFNG O-fucosylpeptide 3-beta-N-acetylglucosaminyltransferase [Source:HGNC Symbol;Acc:HGNC:6560]
ENSG00000177990	0.485784	-1.04161	1.08564e-07	4.54054e-07	yes	down	4.88667	2.70333	4.06	4.88	5.72	2	2.75	3.36	DPY19L2	dpy-19 like 2 [Source:HGNC Symbol;Acc:HGNC:19414]
ENSG00000179111	4.40695	2.13978	1.08986e-07	4.55725e-07	yes	up	0.58	2.40333	0.47	0.48	0.79	2.18	2.74	2.29	HES7	hes family bHLH transcription factor 7 [Source:HGNC Symbol;Acc:HGNC:15977]
ENSG00000112139	3.30775	1.72585	1.11234e-07	4.64841e-07	yes	up	0.346667	1.15333	0.3	0.39	0.35	1.45	1.16	0.85	MDGA1	MAM domain containing glycosylphosphatidylinositol anchor 1 [Source:HGNC Symbol;Acc:HGNC:19267]
ENSG00000176595	0.419946	-1.25173	1.11623e-07	4.6637e-07	yes	down	1.47333	0.626667	1.2	1.61	1.61	0.74	0.64	0.5	KBTBD11	kelch repeat and BTB domain containing 11 [Source:HGNC Symbol;Acc:HGNC:29104]
ENSG00000106077	0.481659	-1.05392	1.11737e-07	4.66752e-07	yes	down	11.3633	5.68333	12.16	9.71	12.22	6.41	5.21	5.43	ABHD11	abhydrolase domain containing 11 [Source:HGNC Symbol;Acc:HGNC:16407]
ENSG00000119888	0.208254	-2.26358	1.12578e-07	4.70167e-07	yes	down	2.57667	0.506667	2.87	1.75	3.11	0.51	0.51	0.5	EPCAM	epithelial cell adhesion molecule [Source:HGNC Symbol;Acc:HGNC:11529]
ENSG00000159588	2.81097	1.49107	1.18259e-07	4.92891e-07	yes	up	0.953333	2.83333	0.77	0.98	1.11	3.22	3.05	2.23	CCDC17	coiled-coil domain containing 17 [Source:HGNC Symbol;Acc:HGNC:26574]
ENSG00000100206	0.0279282	-5.16213	1.19856e-07	4.99446e-07	yes	down	2.26333	0.126667	1.52	2.57	2.7	0	0	0.38	DMC1	DNA meiotic recombinase 1 [Source:HGNC Symbol;Acc:HGNC:2927]
ENSG00000139572	12.0353	3.5892	1.24789e-07	5.19474e-07	yes	up	0.116667	1.55	0.08	0.04	0.23	1.24	1.62	1.79	GPR84	G protein-coupled receptor 84 [Source:HGNC Symbol;Acc:HGNC:4535]
ENSG00000156042	2.42327	1.27695	1.32276e-07	5.4997e-07	yes	up	1.42333	7.17333	1.14	1.2	1.93	5.24	6.61	9.67	CFAP70	cilia and flagella associated protein 70 [Source:HGNC Symbol;Acc:HGNC:30726]
ENSG00000142494	0.457695	-1.12754	1.34317e-07	5.57889e-07	yes	down	3.39	1.65667	3.51	3.27	3.39	1.93	1.57	1.47	SLC47A1	solute carrier family 47 member 1 [Source:HGNC Symbol;Acc:HGNC:25588]
ENSG00000175322	0.413372	-1.27449	1.37246e-07	5.69709e-07	yes	down	5.22	1.59333	4.82	4.91	5.93	1.63	1.28	1.87	ZNF519	zinc finger protein 519 [Source:HGNC Symbol;Acc:HGNC:30574]
ENSG00000181284	2.21539	1.14756	1.37656e-07	5.71292e-07	yes	up	2.49333	5.63333	3.01	2	2.47	5.97	5.75	5.18	TMEM102	transmembrane protein 102 [Source:HGNC Symbol;Acc:HGNC:26722]
ENSG00000162241	4.10652	2.03792	1.38769e-07	5.75564e-07	yes	up	0.346667	1.72667	0.44	0.28	0.32	1.41	1.61	2.16	SLC25A45	solute carrier family 25 member 45 [Source:HGNC Symbol;Acc:HGNC:27442]
ENSG00000224578	0.421985	-1.24474	1.39769e-07	5.79592e-07	yes	down	6.73667	2.87667	6.74	6.84	6.63	2.96	2.74	2.93	HNRNPA1P48	heterogeneous nuclear ribonucleoprotein A1 pseudogene 48 [Source:HGNC Symbol;Acc:HGNC:48778]
ENSG00000154611	0.231739	-2.10943	1.43567e-07	5.94982e-07	yes	down	1.81333	0.433333	1.57	1.76	2.11	0.38	0.68	0.24	PSMA8	proteasome subunit alpha 8 [Source:HGNC Symbol;Acc:HGNC:22985]
ENSG00000236404	2.20171	1.13862	1.45691e-07	6.03051e-07	yes	up	2.22333	4.36667	2.28	2.88	1.51	3.7	5.44	3.96	VLDLR-AS1	VLDLR antisense RNA 1 [Source:HGNC Symbol;Acc:HGNC:49621]
ENSG00000198732	2.01174	1.00844	1.4612e-07	6.04706e-07	yes	up	2.88667	5.34667	2.26	2.78	3.62	5.23	5.65	5.16	SMOC1	SPARC related modular calcium binding 1 [Source:HGNC Symbol;Acc:HGNC:20318]
ENSG00000279541	8.79105	3.13604	1.4686e-07	6.07646e-07	yes	up	0.213333	1.90667	0.18	0.22	0.24	1.5	2.19	2.03	AC005261.5	TEC
ENSG00000185019	0.454111	-1.13888	1.60632e-07	6.6262e-07	yes	down	2.43333	1.06333	2.78	2.46	2.06	0.93	1.21	1.05	UBOX5	U-box domain containing 5 [Source:HGNC Symbol;Acc:HGNC:17777]
ENSG00000186666	2.01692	1.01216	1.81744e-07	7.46848e-07	yes	up	2.15	4.45	1.78	2.02	2.65	4.82	4.37	4.16	BCDIN3D	BCDIN3 domain containing RNA methyltransferase [Source:HGNC Symbol;Acc:HGNC:27050]
ENSG00000281991	3.27882	1.71318	1.82943e-07	7.51625e-07	yes	up	1.88	6.19333	1.66	1.7	2.28	6.59	6.41	5.58	TMEM265	transmembrane protein 265 [Source:HGNC Symbol;Acc:HGNC:51241]
ENSG00000187479	7.68379	2.94182	1.84166e-07	7.565e-07	yes	up	0.296667	2.33333	0.19	0.43	0.27	1.97	2.14	2.89	C11orf96	chromosome 11 open reading frame 96 [Source:HGNC Symbol;Acc:HGNC:38675]
ENSG00000279628	122.436	6.93589	1.88224e-07	7.72549e-07	yes	up	0	0.453333	0	0	0	0.39	0.42	0.55	AC131280.1	novel transcript
ENSG00000239282	2.68492	1.42488	1.9475e-07	7.98055e-07	yes	up	2.01	5.8	1.67	2.56	1.8	5.21	6.43	5.76	CASTOR1	cytosolic arginine sensor for mTORC1 subunit 1 [Source:HGNC Symbol;Acc:HGNC:34423]
ENSG00000175600	2.69576	1.43069	2.01086e-07	8.23687e-07	yes	up	2.83667	14.02	4.12	1.73	2.66	12.77	15.72	13.57	SUGCT	succinyl-CoA:glutarate-CoA transferase [Source:HGNC Symbol;Acc:HGNC:16001]
ENSG00000158106	2.36471	1.24166	2.04306e-07	8.3604e-07	yes	up	1.31	2.73333	1.05	1.38	1.5	2.8	2.81	2.59	RHPN1	rhophilin Rho GTPase binding protein 1 [Source:HGNC Symbol;Acc:HGNC:19973]
ENSG00000182185	0.460358	-1.11917	2.04445e-07	8.36442e-07	yes	down	9.47	4.57667	8.12	7.5	12.79	6.24	3.64	3.85	RAD51B	RAD51 paralog B [Source:HGNC Symbol;Acc:HGNC:9822]
ENSG00000110628	3.59589	1.84635	2.04815e-07	8.3779e-07	yes	up	1.13667	4.58667	1.25	1.51	0.65	4.22	5.66	3.88	SLC22A18	solute carrier family 22 member 18 [Source:HGNC Symbol;Acc:HGNC:10964]
ENSG00000102048	0.234197	-2.0942	2.12933e-07	8.70301e-07	yes	down	3.61	0.826667	3.9	3.96	2.97	0.89	0.68	0.91	ASB9	ankyrin repeat and SOCS box containing 9 [Source:HGNC Symbol;Acc:HGNC:17184]
ENSG00000073910	0.448922	-1.15546	2.22098e-07	9.06857e-07	yes	down	1.21	0.813333	0.74	1.77	1.12	1.06	0.39	0.99	FRY	FRY microtubule binding protein [Source:HGNC Symbol;Acc:HGNC:20367]
ENSG00000142544	2.78831	1.47939	2.2925e-07	9.34942e-07	yes	up	1.21333	3.53	1.01	1.2	1.43	2.68	4.24	3.67	CTU1	cytosolic thiouridylase subunit 1 [Source:HGNC Symbol;Acc:HGNC:29590]
ENSG00000196376	0.184451	-2.43869	2.30428e-07	9.39183e-07	yes	down	0.656667	0.12	0.67	0.77	0.53	0.08	0.08	0.2	SLC35F1	solute carrier family 35 member F1 [Source:HGNC Symbol;Acc:HGNC:21483]
ENSG00000179588	2.16618	1.11515	2.37096e-07	9.65591e-07	yes	up	1.45	2.06667	2.14	0.79	1.42	1.85	1.95	2.4	ZFPM1	zinc finger protein, FOG family member 1 [Source:HGNC Symbol;Acc:HGNC:19762]
ENSG00000228544	0.404091	-1.30725	2.74527e-07	1.11206e-06	yes	down	2.59333	1.03333	2.97	2.58	2.23	1.23	0.78	1.09	CCDC183-AS1	CCDC183 antisense RNA 1 [Source:HGNC Symbol;Acc:HGNC:44105]
ENSG00000234602	0.270857	-1.88439	2.8971e-07	1.17217e-06	yes	down	2.63	0.603333	2.39	2.73	2.77	0.58	0.5	0.73	MCIDAS	multiciliate differentiation and DNA synthesis associated cell cycle protein [Source:HGNC Symbol;Acc:HGNC:40050]
ENSG00000152377	0.483185	-1.04935	2.9436e-07	1.18958e-06	yes	down	3.37	1.23333	3.17	3.66	3.28	1.01	1.23	1.46	SPOCK1	SPARC (osteonectin), cwcv and kazal like domains proteoglycan 1 [Source:HGNC Symbol;Acc:HGNC:11251]
ENSG00000267774	0.189588	-2.39906	3.01214e-07	1.21608e-06	yes	down	3.35333	0.653333	3.5	3.49	3.07	0.55	0.91	0.5	AC010776.2	novel transcript, antisense to CCBE1
ENSG00000139364	2.05005	1.03566	3.0434e-07	1.22822e-06	yes	up	1.46333	1.25	1.73	1.87	0.79	1.15	1.27	1.33	TMEM132B	transmembrane protein 132B [Source:HGNC Symbol;Acc:HGNC:29397]
ENSG00000255224	2.62794	1.39393	3.06994e-07	1.23868e-06	yes	up	2.34	5.97667	2.62	1.68	2.72	5.78	6.01	6.14	AC109322.1	TEC
ENSG00000167994	0.38814	-1.36535	3.09163e-07	1.24694e-06	yes	down	3.56667	1.48	4.26	3.46	2.98	1.9	1.09	1.45	RAB3IL1	RAB3A interacting protein like 1 [Source:HGNC Symbol;Acc:HGNC:9780]
ENSG00000278616	2.28985	1.19525	3.10663e-07	1.25274e-06	yes	up	1.75667	4.09	1.87	1.66	1.74	4.85	3.08	4.34	BEND3P3	BEN domain containing 3 pseudogene 3 [Source:HGNC Symbol;Acc:HGNC:45016]
ENSG00000270344	2.76074	1.46506	3.19811e-07	1.28862e-06	yes	up	0.316667	1.73	0.45	0.22	0.28	1.81	0.9	2.48	POC1B-AS1	POC1B antisense RNA 1 [Source:HGNC Symbol;Acc:HGNC:52949]
ENSG00000213189	0.492544	-1.02168	3.2363e-07	1.30349e-06	yes	down	118.263	59.43	121.45	126.17	107.17	59.79	62.83	55.67	BTF3L4P2	basic transcription factor 3 like 4 pseudogene 2 [Source:HGNC Symbol;Acc:HGNC:39646]
ENSG00000166341	0.202969	-2.30067	3.25148e-07	1.30935e-06	yes	down	0.293333	0.06	0.26	0.34	0.28	0.03	0.09	0.06	DCHS1	dachsous cadherin-related 1 [Source:HGNC Symbol;Acc:HGNC:13681]
ENSG00000259699	0.253438	-1.9803	3.33029e-07	1.34056e-06	yes	down	5.36333	1.38667	5.22	4.4	6.47	1.74	1	1.42	HMGB1P8	high mobility group box 1 pseudogene 8 [Source:HGNC Symbol;Acc:HGNC:13319]
ENSG00000158296	3.08112	1.62345	4.31241e-07	1.72035e-06	yes	up	1.60667	3.2	1.37	2.36	1.09	3.06	3.38	3.16	SLC13A3	solute carrier family 13 member 3 [Source:HGNC Symbol;Acc:HGNC:14430]
ENSG00000239213	2.23672	1.16138	4.62352e-07	1.84087e-06	yes	up	4.93667	9.96667	4.33	4.04	6.44	9.63	11	9.27	NCK1-DT	NCK1 divergent transcript [Source:HGNC Symbol;Acc:HGNC:49645]
ENSG00000167371	6.83328	2.77258	4.70509e-07	1.87262e-06	yes	up	0.163333	1.00667	0.18	0.24	0.07	1.21	0.99	0.82	PRRT2	proline rich transmembrane protein 2 [Source:HGNC Symbol;Acc:HGNC:30500]
ENSG00000171450	2.44971	1.29261	4.86092e-07	1.93351e-06	yes	up	1.28333	3.16333	1.08	1.13	1.64	2.91	3.01	3.57	CDK5R2	cyclin dependent kinase 5 regulatory subunit 2 [Source:HGNC Symbol;Acc:HGNC:1776]
ENSG00000284906	0.0903553	-3.46825	4.8823e-07	1.94164e-06	yes	down	1.35	0.15	1.19	1.37	1.49	0.32	0	0.13	ARHGAP11B	Rho GTPase activating protein 11B [Source:HGNC Symbol;Acc:HGNC:15782]
ENSG00000261371	4.83386	2.27318	4.98192e-07	1.97972e-06	yes	up	0.226667	1.47	0.28	0.26	0.14	1.78	1.64	0.99	PECAM1	platelet and endothelial cell adhesion molecule 1 [Source:HGNC Symbol;Acc:HGNC:8823]
ENSG00000154678	0.388815	-1.36284	4.99546e-07	1.98471e-06	yes	down	1.47667	0.606667	1.86	1.3	1.27	0.61	0.71	0.5	PDE1C	phosphodiesterase 1C [Source:HGNC Symbol;Acc:HGNC:8776]
ENSG00000135835	3.04328	1.60563	5.21066e-07	2.06661e-06	yes	up	0.15	0.62	0.15	0.16	0.14	0.43	0.46	0.97	KIAA1614	KIAA1614 [Source:HGNC Symbol;Acc:HGNC:29327]
ENSG00000123338	0.0643673	-3.95753	5.38216e-07	2.13215e-06	yes	down	0.473333	0.02	0.68	0.45	0.29	0.02	0.02	0.02	NCKAP1L	NCK associated protein 1 like [Source:HGNC Symbol;Acc:HGNC:4862]
ENSG00000108821	0.154379	-2.69545	5.66084e-07	2.23778e-06	yes	down	0.566667	0.2	0.69	0.64	0.37	0.08	0.06	0.46	COL1A1	collagen type I alpha 1 chain [Source:HGNC Symbol;Acc:HGNC:2197]
ENSG00000113763	0.319857	-1.6445	5.70761e-07	2.25453e-06	yes	down	1.27333	0.416667	1.38	1.29	1.15	0.47	0.47	0.31	UNC5A	unc-5 netrin receptor A [Source:HGNC Symbol;Acc:HGNC:12567]
ENSG00000284956	4.30878	2.10728	6.03152e-07	2.37652e-06	yes	up	0.12	0.696667	0.15	0.13	0.08	1	0.57	0.52	AC107959.5	novel protein
ENSG00000119508	3.07229	1.61931	6.11259e-07	2.408e-06	yes	up	0.303333	0.923333	0.26	0.25	0.4	1	0.9	0.87	NR4A3	nuclear receptor subfamily 4 group A member 3 [Source:HGNC Symbol;Acc:HGNC:7982]
ENSG00000163362	2.18325	1.12648	6.48892e-07	2.55036e-06	yes	up	1.54667	3.47333	0.87	2.19	1.58	2.84	3.79	3.79	INAVA	innate immunity activator [Source:HGNC Symbol;Acc:HGNC:25599]
ENSG00000116771	0.306755	-1.70484	6.5159e-07	2.55852e-06	yes	down	2.32333	0.763333	2.72	1.59	2.66	0.76	0.83	0.7	AGMAT	agmatinase [Source:HGNC Symbol;Acc:HGNC:18407]
ENSG00000141576	0.110254	-3.18109	7.00876e-07	2.74678e-06	yes	down	0.57	0.0533333	0.63	0.42	0.66	0.09	0.01	0.06	RNF157	ring finger protein 157 [Source:HGNC Symbol;Acc:HGNC:29402]
ENSG00000157404	0.123031	-3.0229	7.12943e-07	2.7914e-06	yes	down	0.46	0.0566667	0.44	0.61	0.33	0.07	0.02	0.08	KIT	KIT proto-oncogene receptor tyrosine kinase [Source:HGNC Symbol;Acc:HGNC:6342]
ENSG00000102760	0.361593	-1.46756	7.5032e-07	2.93213e-06	yes	down	7.57	2.78333	6.55	8.53	7.63	3.25	2.8	2.3	RGCC	regulator of cell cycle [Source:HGNC Symbol;Acc:HGNC:20369]
ENSG00000163328	2.06248	1.04438	7.90974e-07	3.08394e-06	yes	up	0.78	1.96667	0.65	0.96	0.73	1.52	2.64	1.74	GPR155	G protein-coupled receptor 155 [Source:HGNC Symbol;Acc:HGNC:22951]
ENSG00000110944	6.12302	2.61424	8.22095e-07	3.20162e-06	yes	up	0.503333	2.72667	0.59	0.49	0.43	2.16	2.93	3.09	IL23A	interleukin 23 subunit alpha [Source:HGNC Symbol;Acc:HGNC:15488]
ENSG00000175505	0.460579	-1.11848	8.37259e-07	3.25944e-06	yes	down	6.25667	2.98	6.64	5.6	6.53	3.8	2.25	2.89	CLCF1	cardiotrophin like cytokine factor 1 [Source:HGNC Symbol;Acc:HGNC:17412]
ENSG00000163082	0.224771	-2.15347	8.50548e-07	3.30928e-06	yes	down	0.61	0.14	0.72	0.58	0.53	0.11	0.16	0.15	SGPP2	sphingosine-1-phosphate phosphatase 2 [Source:HGNC Symbol;Acc:HGNC:19953]
ENSG00000261342	4.02965	2.01065	8.71032e-07	3.38705e-06	yes	up	0.576667	2.4	0.42	0.71	0.6	2.52	2.5	2.18	AC006538.1	novel transcript
ENSG00000169330	2.19306	1.13295	8.9273e-07	3.46945e-06	yes	up	0.526667	1.18667	0.53	0.52	0.53	1.21	1.07	1.28	MINAR1	membrane integral NOTCH2 associated receptor 1 [Source:HGNC Symbol;Acc:HGNC:29172]
ENSG00000286104	2.14584	1.10155	9.00989e-07	3.50022e-06	yes	up	5.73	8.50333	6.41	6.4	4.38	7.55	8.96	9	AC016629.3	Novel transcript
ENSG00000107551	2.19735	1.13576	9.32645e-07	3.61634e-06	yes	up	1.31333	3.63667	0.95	1.56	1.43	3.71	2.74	4.46	RASSF4	Ras association domain family member 4 [Source:HGNC Symbol;Acc:HGNC:20793]
ENSG00000152137	3.65399	1.86947	9.75528e-07	3.77618e-06	yes	up	0.486667	1.82	0.51	0.53	0.42	1.65	2.08	1.73	HSPB8	heat shock protein family B (small) member 8 [Source:HGNC Symbol;Acc:HGNC:30171]
ENSG00000213085	0.378505	-1.40162	9.81824e-07	3.79912e-06	yes	down	5.6	2.62667	6.65	5.12	5.03	1.9	3.1	2.88	CFAP45	cilia and flagella associated protein 45 [Source:HGNC Symbol;Acc:HGNC:17229]
ENSG00000264558	0.429413	-1.21956	9.96291e-07	3.84877e-06	yes	down	259.29	112.797	283.75	213.89	280.23	107.53	105.75	125.11	AC015674.1	novel transcript, antisense to KPNB1
ENSG00000180332	0.332314	-1.58938	1.01475e-06	3.91763e-06	yes	down	2.29	0.77	2.28	2.31	2.28	0.59	0.86	0.86	KCTD4	potassium channel tetramerization domain containing 4 [Source:HGNC Symbol;Acc:HGNC:23227]
ENSG00000224294	102.064	6.67333	1.04414e-06	4.02806e-06	yes	up	0	0.536667	0	0	0	0.57	0.67	0.37	PINCR	p53-induced noncoding RNA [Source:HGNC Symbol;Acc:HGNC:53590]
ENSG00000240764	2.97223	1.57155	1.07426e-06	4.13803e-06	yes	up	0.386667	1.19	0.44	0.51	0.21	0.99	1.33	1.25	PCDHGC5	protocadherin gamma subfamily C, 5 [Source:HGNC Symbol;Acc:HGNC:8718]
ENSG00000197847	7.67263	2.93972	1.08838e-06	4.19162e-06	yes	up	0.253333	1.2	0.21	0.48	0.07	0.61	1.16	1.83	SLC22A20P	solute carrier family 22 member 20, pseudogene [Source:HGNC Symbol;Acc:HGNC:29867]
ENSG00000254535	0.449595	-1.1533	1.12393e-06	4.32611e-06	yes	down	1.69667	0.77	1.52	1.77	1.8	0.58	0.86	0.87	PABPC4L	poly(A) binding protein cytoplasmic 4 like [Source:HGNC Symbol;Acc:HGNC:31955]
ENSG00000149781	2.61269	1.38553	1.13773e-06	4.37758e-06	yes	up	1.65333	5.34333	1.21	2.39	1.36	6.93	3.37	5.73	FERMT3	fermitin family member 3 [Source:HGNC Symbol;Acc:HGNC:23151]
ENSG00000255561	0.38113	-1.39164	1.14466e-06	4.4034e-06	yes	down	2.38333	0.95	1.89	2.78	2.48	0.78	1.11	0.96	FDXACB1	ferredoxin-fold anticodon binding domain containing 1 [Source:HGNC Symbol;Acc:HGNC:25110]
ENSG00000166922	3.47557	1.79725	1.21998e-06	4.6835e-06	yes	up	1.71667	6.69	1.49	2.32	1.34	5.99	8.35	5.73	SCG5	secretogranin V [Source:HGNC Symbol;Acc:HGNC:10816]
ENSG00000164418	2.83389	1.50279	1.23024e-06	4.72111e-06	yes	up	0.653333	1.80333	0.44	0.75	0.77	2.14	1.68	1.59	GRIK2	glutamate ionotropic receptor kainate type subunit 2 [Source:HGNC Symbol;Acc:HGNC:4580]
ENSG00000173376	0.130735	-2.93528	1.2306e-06	4.7216e-06	yes	down	0.783333	0.133333	0.48	0.9	0.97	0.14	0.17	0.09	NDNF	neuron derived neurotrophic factor [Source:HGNC Symbol;Acc:HGNC:26256]
ENSG00000152270	0.375353	-1.41368	1.25741e-06	4.81813e-06	yes	down	1.00667	0.453333	1.18	0.85	0.99	0.37	0.43	0.56	PDE3B	phosphodiesterase 3B [Source:HGNC Symbol;Acc:HGNC:8779]
ENSG00000286106	0.165452	-2.59552	1.4026e-06	5.34849e-06	yes	down	2.90333	0.513333	2.31	2.51	3.89	0.55	0.77	0.22	AC253572.1	notch 2 N-terminal like R
ENSG00000135116	2.04568	1.03258	1.44136e-06	5.49115e-06	yes	up	0.92	1.89667	0.79	0.75	1.22	1.82	1.96	1.91	HRK	harakiri, BCL2 interacting protein [Source:HGNC Symbol;Acc:HGNC:5185]
ENSG00000171443	2.06285	1.04464	1.45709e-06	5.54901e-06	yes	up	4.46333	9.44667	4.25	4.59	4.55	8.15	10.12	10.07	ZNF524	zinc finger protein 524 [Source:HGNC Symbol;Acc:HGNC:28322]
ENSG00000171502	0.364736	-1.45507	1.4612e-06	5.56263e-06	yes	down	1.29333	0.9	1.03	0.84	2.01	0.25	0.34	2.11	COL24A1	collagen type XXIV alpha 1 chain [Source:HGNC Symbol;Acc:HGNC:20821]
ENSG00000112299	2.48031	1.31052	1.49164e-06	5.6711e-06	yes	up	0.843333	2.12333	0.88	0.75	0.9	1.97	2.62	1.78	VNN1	vanin 1 [Source:HGNC Symbol;Acc:HGNC:12705]
ENSG00000179476	2.02109	1.01514	1.49897e-06	5.69687e-06	yes	up	2.42333	4.37667	1.78	1.68	3.81	4.11	4.3	4.72	C14orf28	chromosome 14 open reading frame 28 [Source:HGNC Symbol;Acc:HGNC:19834]
ENSG00000196267	2.59509	1.37578	1.56208e-06	5.92536e-06	yes	up	0.933333	2.51	1.13	1.04	0.63	2.38	2.92	2.23	ZNF836	zinc finger protein 836 [Source:HGNC Symbol;Acc:HGNC:34333]
ENSG00000105246	5.4146	2.43686	1.69879e-06	6.42173e-06	yes	up	0.523333	2.78667	0.38	0.3	0.89	3.01	2.87	2.48	EBI3	Epstein-Barr virus induced 3 [Source:HGNC Symbol;Acc:HGNC:3129]
ENSG00000137070	2.48026	1.31049	1.69922e-06	6.42216e-06	yes	up	1.96667	4.66	2.25	1.47	2.18	3.92	4.45	5.61	IL11RA	interleukin 11 receptor subunit alpha [Source:HGNC Symbol;Acc:HGNC:5967]
ENSG00000226650	0.0629079	-3.99062	1.72242e-06	6.50473e-06	yes	down	0.373333	0.0233333	0.36	0.41	0.35	0.05	0.01	0.01	KIF4B	kinesin family member 4B [Source:HGNC Symbol;Acc:HGNC:6322]
ENSG00000283189	2.22874	1.15623	1.78236e-06	6.72151e-06	yes	up	0.69	1.90667	0.63	0.61	0.83	1.5	1.79	2.43	AC104452.1	novel protein
ENSG00000127526	3.30895	1.72637	1.79509e-06	6.76452e-06	yes	up	7.15667	15.7467	9.91	7.78	3.78	12.45	14.64	20.15	SLC35E1	solute carrier family 35 member E1 [Source:HGNC Symbol;Acc:HGNC:20803]
ENSG00000172780	2.23021	1.15718	1.81024e-06	6.81784e-06	yes	up	9.53	15.74	8.14	11.67	8.78	16.35	15.32	15.55	RAB43	RAB43, member RAS oncogene family [Source:HGNC Symbol;Acc:HGNC:19983]
ENSG00000271976	3.38947	1.76106	1.90788e-06	7.16715e-06	yes	up	0.606667	2.07667	0.84	0.28	0.7	1.58	2.3	2.35	AC012467.2	novel transcript, antisense to IL17RB
ENSG00000104267	0.46947	-1.0909	1.94552e-06	7.29918e-06	yes	down	6.84333	3.10667	6.59	7.22	6.72	3.42	2.28	3.62	CA2	carbonic anhydrase 2 [Source:HGNC Symbol;Acc:HGNC:1373]
ENSG00000087245	2.32742	1.21873	1.96737e-06	7.37978e-06	yes	up	0.96	2.09333	1.08	0.95	0.85	2.4	1.66	2.22	MMP2	matrix metallopeptidase 2 [Source:HGNC Symbol;Acc:HGNC:7166]
ENSG00000225269	0.381784	-1.38917	1.98638e-06	7.44974e-06	yes	down	3.54667	1.36667	3.43	3.88	3.33	1.09	1.33	1.68	LINC00705	long intergenic non-protein coding RNA 705 [Source:HGNC Symbol;Acc:HGNC:27874]
ENSG00000119608	5.70075	2.51115	2.03468e-06	7.62251e-06	yes	up	0.13	0.733333	0.08	0.12	0.19	0.87	0.71	0.62	PROX2	prospero homeobox 2 [Source:HGNC Symbol;Acc:HGNC:26715]
ENSG00000185838	0.497983	-1.00583	2.18092e-06	8.14654e-06	yes	down	7.72	3.12	6.75	9.07	7.34	3.88	2.84	2.64	GNB1L	G protein subunit beta 1 like [Source:HGNC Symbol;Acc:HGNC:4397]
ENSG00000229809	2.17986	1.12423	2.22811e-06	8.31977e-06	yes	up	2.21	5.24333	2.58	2.19	1.86	4.36	5.97	5.4	ZNF688	zinc finger protein 688 [Source:HGNC Symbol;Acc:HGNC:30489]
ENSG00000198963	0.483018	-1.04985	2.3472e-06	8.74053e-06	yes	down	1.13	0.546667	1.14	1.1	1.15	0.37	0.6	0.67	RORB	RAR related orphan receptor B [Source:HGNC Symbol;Acc:HGNC:10259]
ENSG00000204314	4.791	2.26033	2.4345e-06	9.0459e-06	yes	up	0.38	1.65333	0.37	0.45	0.32	1.81	1.68	1.47	PRRT1	proline rich transmembrane protein 1 [Source:HGNC Symbol;Acc:HGNC:13943]
ENSG00000257335	19.7608	4.30457	2.46066e-06	9.13977e-06	yes	up	0.0666667	0.236667	0	0.18	0.02	0.22	0.18	0.31	MGAM	maltase-glucoamylase [Source:HGNC Symbol;Acc:HGNC:7043]
ENSG00000223573	6.48719	2.69759	2.46472e-06	9.15155e-06	yes	up	0.0866667	0.846667	0.07	0.08	0.11	0.74	0.94	0.86	TINCR	TINCR ubiquitin domain containing [Source:HGNC Symbol;Acc:HGNC:14607]
ENSG00000105894	0.22583	-2.14669	2.52057e-06	9.34705e-06	yes	down	2.29333	0.563333	1.69	2.86	2.33	0.29	0.72	0.68	PTN	pleiotrophin [Source:HGNC Symbol;Acc:HGNC:9630]
ENSG00000186205	0.464207	-1.10716	2.54822e-06	9.44447e-06	yes	down	4.37	1.65333	5.48	3.66	3.97	1.44	2.01	1.51	2020-03-01	mitochondrial amidoxime reducing component 1 [Source:HGNC Symbol;Acc:HGNC:26189]
ENSG00000128714	0.481086	-1.05563	2.57073e-06	9.52443e-06	yes	down	3.81667	1.86	3.46	3.72	4.27	1.79	2.14	1.65	HOXD13	homeobox D13 [Source:HGNC Symbol;Acc:HGNC:5136]
ENSG00000168874	0.11115	-3.16942	2.6073e-06	9.64948e-06	yes	down	0.77	0.0833333	0.54	0.98	0.79	0.02	0.11	0.12	ATOH8	atonal bHLH transcription factor 8 [Source:HGNC Symbol;Acc:HGNC:24126]
ENSG00000198892	3.73672	1.90177	2.62209e-06	9.69718e-06	yes	up	1.31667	5.86333	0.42	1.38	2.15	6.38	5.46	5.75	SHISA4	shisa family member 4 [Source:HGNC Symbol;Acc:HGNC:27139]
ENSG00000118507	0.495249	-1.01377	2.63405e-06	9.73789e-06	yes	down	5.25333	2.56333	4.87	4.27	6.62	2.46	2.27	2.96	AKAP7	A-kinase anchoring protein 7 [Source:HGNC Symbol;Acc:HGNC:377]
ENSG00000267121	2.58854	1.37214	2.6593e-06	9.82239e-06	yes	up	1.63	4.46	2.16	1.85	0.88	4.19	4.05	5.14	AC008105.3	novel transcript, antisense to FMNL1
ENSG00000185245	3.18065	1.66932	2.69492e-06	9.94855e-06	yes	up	0.61	1.97	0.4	0.61	0.82	2.1	1.99	1.82	GP1BA	glycoprotein Ib platelet subunit alpha [Source:HGNC Symbol;Acc:HGNC:4439]
ENSG00000179397	10.5837	3.40377	2.78828e-06	1.02729e-05	yes	up	0.12	0.69	0.06	0.02	0.28	0.56	0.63	0.88	CATSPERE	catsper channel auxiliary subunit epsilon [Source:HGNC Symbol;Acc:HGNC:28491]
ENSG00000283064	6.65194	2.73378	2.91594e-06	1.07316e-05	yes	up	0.223333	1.50667	0.3	0.12	0.25	1.65	1.64	1.23	AL353759.1	novel transcript, antisense to HIST1H2BD
ENSG00000234235	0.22646	-2.14267	3.01123e-06	1.10644e-05	yes	down	1.59667	0.37	1.62	1.02	2.15	0.27	0.39	0.45	BOK-AS1	BOK antisense RNA 1 [Source:HGNC Symbol;Acc:HGNC:35125]
ENSG00000229373	3.46033	1.79091	3.03438e-06	1.11383e-05	yes	up	0.243333	0.873333	0.23	0.2	0.3	0.86	0.84	0.92	LINC00452	long intergenic non-protein coding RNA 452 [Source:HGNC Symbol;Acc:HGNC:42800]
ENSG00000151117	2.26268	1.17803	3.0705e-06	1.126e-05	yes	up	0.97	2.22667	0.8	1.19	0.92	2.66	1.88	2.14	TMEM86A	transmembrane protein 86A [Source:HGNC Symbol;Acc:HGNC:26890]
ENSG00000154188	0.283282	-1.81969	3.07051e-06	1.126e-05	yes	down	0.903333	0.333333	0.73	0.95	1.03	0.38	0.3	0.32	ANGPT1	angiopoietin 1 [Source:HGNC Symbol;Acc:HGNC:484]
ENSG00000107518	0.407217	-1.29613	3.11922e-06	1.14325e-05	yes	down	2.14333	1.04667	2.25	1.61	2.57	0.9	0.98	1.26	ATRNL1	attractin like 1 [Source:HGNC Symbol;Acc:HGNC:29063]
ENSG00000233058	3.67044	1.87595	3.18945e-06	1.16795e-05	yes	up	0.21	0.566667	0.32	0.2	0.11	0.53	0.68	0.49	LINC00884	long intergenic non-protein coding RNA 884 [Source:HGNC Symbol;Acc:HGNC:48570]
ENSG00000124107	3.7603	1.91085	3.26187e-06	1.19382e-05	yes	up	2.46333	9.55333	2.91	2.66	1.82	7.84	10.11	10.71	SLPI	secretory leukocyte peptidase inhibitor [Source:HGNC Symbol;Acc:HGNC:11092]
ENSG00000279495	0.318676	-1.64984	3.278e-06	1.19951e-05	yes	down	1.60667	0.52	1.64	1.66	1.52	0.5	0.56	0.5	AL928654.4	novel transcript
ENSG00000188542	2.10043	1.07069	3.28297e-06	1.20112e-05	yes	up	2.38667	3.88667	4.03	1.64	1.49	3.99	4.68	2.99	DUSP28	dual specificity phosphatase 28 [Source:HGNC Symbol;Acc:HGNC:33237]
ENSG00000204334	3.01183	1.59064	3.35832e-06	1.22803e-05	yes	up	1.37	4.09333	1.12	1.84	1.15	3.64	4.39	4.25	ERICH2	glutamate rich 2 [Source:HGNC Symbol;Acc:HGNC:44395]
ENSG00000119862	0.444287	-1.17044	3.37195e-06	1.23279e-05	yes	down	2.59333	1.23	2.9	2.58	2.3	0.73	1.68	1.28	LGALSL	galectin like [Source:HGNC Symbol;Acc:HGNC:25012]
ENSG00000115380	0.357327	-1.48468	3.5683e-06	1.30132e-05	yes	down	2.34667	1.03	3.33	2.18	1.53	1.4	0.78	0.91	EFEMP1	EGF containing fibulin extracellular matrix protein 1 [Source:HGNC Symbol;Acc:HGNC:3218]
ENSG00000149927	2.47462	1.30721	3.66602e-06	1.3353e-05	yes	up	1.39	2.82	1.12	1.88	1.17	2.92	2.43	3.11	DOC2A	double C2 domain alpha [Source:HGNC Symbol;Acc:HGNC:2985]
ENSG00000131944	0.358848	-1.47855	3.75519e-06	1.36632e-05	yes	down	3.32	1.13	3.59	3.86	2.51	1.38	0.93	1.08	FAAP24	FA core complex associated protein 24 [Source:HGNC Symbol;Acc:HGNC:28467]
ENSG00000198088	0.27679	-1.85314	3.84478e-06	1.39792e-05	yes	down	3.24333	1.13	4.44	2.52	2.77	1.94	0.62	0.83	NUP62CL	nucleoporin 62 C-terminal like [Source:HGNC Symbol;Acc:HGNC:25960]
ENSG00000183778	2.70406	1.43512	4.05697e-06	1.47298e-05	yes	up	0.23	0.41	0.21	0.33	0.15	0.3	0.54	0.39	B3GALT5	beta-1,3-galactosyltransferase 5 [Source:HGNC Symbol;Acc:HGNC:920]
ENSG00000101265	0.361964	-1.46608	4.15683e-06	1.50736e-05	yes	down	0.89	0.33	0.75	0.94	0.98	0.26	0.38	0.35	RASSF2	Ras association domain family member 2 [Source:HGNC Symbol;Acc:HGNC:9883]
ENSG00000278212	2.58543	1.3704	4.1986e-06	1.52224e-05	yes	up	19.69	55.1233	24.76	14.14	20.17	54.45	52.78	58.14	AC134878.2	MAFF interacting protein (pseudogene)
ENSG00000183044	6.75442	2.75583	4.21389e-06	1.52752e-05	yes	up	0.116667	0.476667	0.16	0.11	0.08	0.34	0.46	0.63	ABAT	4-aminobutyrate aminotransferase [Source:HGNC Symbol;Acc:HGNC:23]
ENSG00000243789	0.354218	-1.49729	4.28135e-06	1.55032e-05	yes	down	4.26	1.59333	5.3	3.7	3.78	1.95	1.84	0.99	JMJD7	jumonji domain containing 7 [Source:HGNC Symbol;Acc:HGNC:34397]
ENSG00000154930	2.09642	1.06793	4.40162e-06	1.5919e-05	yes	up	1.06	2.22333	1.2	1.08	0.9	2.09	2.22	2.36	ACSS1	acyl-CoA synthetase short chain family member 1 [Source:HGNC Symbol;Acc:HGNC:16091]
ENSG00000143387	2.54076	1.34526	4.40644e-06	1.59337e-05	yes	up	1.49	3.62667	1.63	1.54	1.3	3.52	3.38	3.98	CTSK	cathepsin K [Source:HGNC Symbol;Acc:HGNC:2536]
ENSG00000118513	0.0761423	-3.71516	4.46297e-06	1.61254e-05	yes	down	0.6	0.05	0.8	0.39	0.61	0.02	0.03	0.1	MYB	MYB proto-oncogene, transcription factor [Source:HGNC Symbol;Acc:HGNC:7545]
ENSG00000253214	7.16532	2.84103	4.57797e-06	1.65189e-05	yes	up	0.48	3.65667	0.45	0.39	0.6	3.45	3.95	3.57	AC079209.1	novel transcript
ENSG00000144227	0.0151408	-6.04541	5.01984e-06	1.80688e-05	yes	down	0.56	0.00666667	0.4	0.48	0.8	0	0.02	0	NXPH2	neurexophilin 2 [Source:HGNC Symbol;Acc:HGNC:8076]
ENSG00000230316	0.341621	-1.54953	5.2703e-06	1.89271e-05	yes	down	2.58333	0.843333	2.27	2.55	2.93	0.93	0.69	0.91	FEZF1-AS1	FEZF1 antisense RNA 1 [Source:HGNC Symbol;Acc:HGNC:41001]
ENSG00000064547	3.73884	1.90259	5.36311e-06	1.92469e-05	yes	up	0.786667	2.53	0.53	0.81	1.02	3.13	2.46	2	LPAR2	lysophosphatidic acid receptor 2 [Source:HGNC Symbol;Acc:HGNC:3168]
ENSG00000154080	0.215654	-2.21321	5.50813e-06	1.975e-05	yes	down	0.893333	0.22	0.87	0.89	0.92	0.2	0.15	0.31	CHST9	carbohydrate sulfotransferase 9 [Source:HGNC Symbol;Acc:HGNC:19898]
ENSG00000260910	2.65704	1.40982	5.71457e-06	2.0458e-05	yes	up	1.09	2.90667	0.91	0.77	1.59	3.19	3.32	2.21	LINC00565	long intergenic non-protein coding RNA 565 [Source:HGNC Symbol;Acc:HGNC:43709]
ENSG00000186056	4.04062	2.01458	5.8596e-06	2.09515e-05	yes	up	0.453333	2.11333	0.62	0.38	0.36	2.44	1.71	2.19	MATN1-AS1	MATN1 antisense RNA 1 [Source:HGNC Symbol;Acc:HGNC:40364]
ENSG00000259024	3.08592	1.6257	6.02312e-06	2.14949e-05	yes	up	3.42333	10.25	2.69	3.03	4.55	10.6	12.77	7.38	TVP23C-CDRT4	TVP23C-CDRT4 readthrough [Source:HGNC Symbol;Acc:HGNC:42961]
ENSG00000281026	2.48988	1.31608	6.5812e-06	2.34172e-05	yes	up	0.423333	1.07	0.39	0.43	0.45	1.09	1.16	0.96	N4BP2L2-IT2	N4BPL2 intronic transcript 2 [Source:HGNC Symbol;Acc:HGNC:25038]
ENSG00000113396	0.316171	-1.66122	6.59046e-06	2.34461e-05	yes	down	1.39333	0.45	1.19	1.68	1.31	0.33	0.5	0.52	SLC27A6	solute carrier family 27 member 6 [Source:HGNC Symbol;Acc:HGNC:11000]
ENSG00000082014	2.57686	1.36561	6.60402e-06	2.34862e-05	yes	up	2.31667	12.04	1.81	3.39	1.75	13.48	10.74	11.9	SMARCD3	SWI/SNF related, matrix associated, actin dependent regulator of chromatin, subfamily d, member 3 [Source:HGNC Symbol;Acc:HGNC:11108]
ENSG00000244021	6.58502	2.71919	6.62703e-06	2.35598e-05	yes	up	10.57	71.8333	11.99	5.31	14.41	97.38	58.48	59.64	AC093591.1	ribosomal protein L21 (RPL21) pseudogene
ENSG00000174500	3.98524	1.99467	6.71347e-06	2.38547e-05	yes	up	0.293333	1.18333	0.39	0.25	0.24	1.16	1.39	1	GCSAM	germinal center associated signaling and motility [Source:HGNC Symbol;Acc:HGNC:20253]
ENSG00000100298	24.4531	4.61195	6.78256e-06	2.40855e-05	yes	up	0.153333	2.25667	0.29	0.17	0	1.84	2.84	2.09	APOBEC3H	apolipoprotein B mRNA editing enzyme catalytic subunit 3H [Source:HGNC Symbol;Acc:HGNC:24100]
ENSG00000176490	4.77479	2.25544	6.79719e-06	2.41313e-05	yes	up	0.263333	0.85	0.17	0.56	0.06	0.78	0.9	0.87	DIRAS1	DIRAS family GTPase 1 [Source:HGNC Symbol;Acc:HGNC:19127]
ENSG00000164675	5.92337	2.56642	6.83061e-06	2.42415e-05	yes	up	0.213333	0.676667	0.1	0.39	0.15	0.74	0.7	0.59	IQUB	IQ motif and ubiquitin domain containing [Source:HGNC Symbol;Acc:HGNC:21995]
ENSG00000087589	15.2845	3.93399	6.96653e-06	2.46982e-05	yes	up	0.0366667	0.563333	0.06	0	0.05	0.52	0.79	0.38	CASS4	Cas scaffold protein family member 4 [Source:HGNC Symbol;Acc:HGNC:15878]
ENSG00000130518	9.99912	3.3218	6.97425e-06	2.47213e-05	yes	up	0.0333333	0.323333	0.02	0.05	0.03	0.39	0.31	0.27	IQCN	IQ motif containing N [Source:HGNC Symbol;Acc:HGNC:29350]
ENSG00000230454	5.51609	2.46365	7.03395e-06	2.492e-05	yes	up	0.163333	1.59	0.16	0.27	0.06	0.76	1.87	2.14	U73166.1	novel transcript
ENSG00000279881	0.154524	-2.6941	7.07635e-06	2.50615e-05	yes	down	0.746667	0.113333	0.55	1.02	0.67	0.09	0.06	0.19	AC041040.1	TEC
ENSG00000188910	0.148145	-2.75492	7.45557e-06	2.63635e-05	yes	down	0.956667	0.14	0.95	0.8	1.12	0.16	0.06	0.2	GJB3	gap junction protein beta 3 [Source:HGNC Symbol;Acc:HGNC:4285]
ENSG00000132185	38.3251	5.26022	7.5021e-06	2.65235e-05	yes	up	0.0266667	1.01	0	0.08	0	0.74	1.63	0.66	FCRLA	Fc receptor like A [Source:HGNC Symbol;Acc:HGNC:18504]
ENSG00000254614	3.28885	1.71758	7.94996e-06	2.8015e-05	yes	up	1.11	2.46	0.83	0.94	1.56	2.72	2.6	2.06	AP003068.2	novel transcript, antisense to CAPN1
ENSG00000143382	0.361339	-1.46858	8.51699e-06	2.99051e-05	yes	down	1.68667	0.65	1.56	1.78	1.72	0.75	0.47	0.73	ADAMTSL4	ADAMTS like 4 [Source:HGNC Symbol;Acc:HGNC:19706]
ENSG00000174564	2.53542	1.34222	8.61343e-06	3.02282e-05	yes	up	1.15667	3.24	1.26	1.34	0.87	3.19	3.57	2.96	IL20RB	interleukin 20 receptor subunit beta [Source:HGNC Symbol;Acc:HGNC:6004]
ENSG00000170011	0.307711	-1.70035	8.66368e-06	3.03941e-05	yes	down	2.39333	5.66333	0.72	0.69	5.77	16.56	0.2	0.23	MYRIP	myosin VIIA and Rab interacting protein [Source:HGNC Symbol;Acc:HGNC:19156]
ENSG00000147573	2.51851	1.33257	8.84514e-06	3.09988e-05	yes	up	0.936667	3.06667	1.02	1.07	0.72	3.41	3.35	2.44	TRIM55	tripartite motif containing 55 [Source:HGNC Symbol;Acc:HGNC:14215]
ENSG00000100490	0.336579	-1.57098	9.11595e-06	3.19152e-05	yes	down	7.5	1.81667	5.63	8.34	8.53	2.1	2.26	1.09	CDKL1	cyclin dependent kinase like 1 [Source:HGNC Symbol;Acc:HGNC:1781]
ENSG00000258377	0.490405	-1.02795	9.16187e-06	3.20705e-05	yes	down	4.57667	2.28333	4.35	5.47	3.91	1.65	3.02	2.18	AL139099.1	novel transcript
ENSG00000132326	0.46349	-1.10939	9.19876e-06	3.2187e-05	yes	down	1.08667	0.65	1.15	1.16	0.95	0.53	0.75	0.67	PER2	period circadian regulator 2 [Source:HGNC Symbol;Acc:HGNC:8846]
ENSG00000255517	4.58439	2.19673	9.67737e-06	3.38171e-05	yes	up	1.19333	5.08333	0.52	2.16	0.9	5.66	4.22	5.37	AP002748.3	novel transcript
ENSG00000237352	2.21558	1.14768	9.87569e-06	3.44866e-05	yes	up	9.40333	17.3767	11.67	6.37	10.17	14.3	22.12	15.71	LINC01358	long intergenic non-protein coding RNA 1358 [Source:HGNC Symbol;Acc:HGNC:50589]
ENSG00000067836	0.487699	-1.03594	9.93948e-06	3.46975e-05	yes	down	5.54667	3.21333	5.75	5.9	4.99	3.06	3.33	3.25	ROGDI	rogdi atypical leucine zipper [Source:HGNC Symbol;Acc:HGNC:29478]
ENSG00000270959	0.406702	-1.29795	1.00031e-05	3.49078e-05	yes	down	1.94667	0.803333	1.78	2.19	1.87	0.86	0.64	0.91	LPP-AS2	LPP antisense RNA 2 [Source:HGNC Symbol;Acc:HGNC:27952]
ENSG00000215417	0.401157	-1.31776	1.03748e-05	3.6168e-05	yes	down	3.86667	1.3	4.13	3.79	3.68	1.41	1.13	1.36	MIR17HG	miR-17-92a-1 cluster host gene [Source:HGNC Symbol;Acc:HGNC:23564]
ENSG00000272341	3.44743	1.78552	1.04854e-05	3.65286e-05	yes	up	0.47	1.64	0.26	0.72	0.43	1.26	1.97	1.69	AL137003.2	novel transcript
ENSG00000197332	0.333431	-1.58454	1.08893e-05	3.78907e-05	yes	down	0.713333	0.246667	0.94	0.57	0.63	0.25	0.18	0.31	AC008543.1	novel transcript
ENSG00000239462	2.68284	1.42376	1.10888e-05	3.85584e-05	yes	up	0.876667	2.39	0.65	1.2	0.78	2.52	2.66	1.99	AC091212.1	novel transcript
ENSG00000141527	4.02059	2.00741	1.18523e-05	4.11295e-05	yes	up	0.166667	0.673333	0.21	0.14	0.15	0.48	0.62	0.92	CARD14	caspase recruitment domain family member 14 [Source:HGNC Symbol;Acc:HGNC:16446]
ENSG00000273079	0.0715461	-3.80498	1.21281e-05	4.2058e-05	yes	down	0.103333	0.00333333	0.15	0.12	0.04	0.01	0	0	GRIN2B	glutamate ionotropic receptor NMDA type subunit 2B [Source:HGNC Symbol;Acc:HGNC:4586]
ENSG00000237943	0.434922	-1.20117	1.22817e-05	4.25694e-05	yes	down	8.39333	3.66333	8.97	9.81	6.4	3.77	2.74	4.48	PRKCQ-AS1	PRKCQ antisense RNA 1 [Source:HGNC Symbol;Acc:HGNC:44689]
ENSG00000248866	0.4387	-1.18869	1.25619e-05	4.34888e-05	yes	down	1.9	0.82	1.52	2.42	1.76	1.14	0.68	0.64	USP46-AS1	USP46 antisense RNA 1 [Source:HGNC Symbol;Acc:HGNC:43991]
ENSG00000276672	0.267599	-1.90186	1.28044e-05	4.42985e-05	yes	down	0.693333	0.19	0.88	0.59	0.61	0.15	0.12	0.3	AL161891.1	novel transcript, sense intronic to RFC3
ENSG00000206192	4.865	2.28244	1.28109e-05	4.43135e-05	yes	up	0.146667	0.76	0.19	0.11	0.14	0.78	0.69	0.81	ANKRD20A9P	ankyrin repeat domain 20 family member A9, pseudogene [Source:HGNC Symbol;Acc:HGNC:42023]
ENSG00000187243	2.13641	1.09519	1.29559e-05	4.47846e-05	yes	up	3.24333	7.42333	4.88	3.52	1.33	7.61	7.17	7.49	MAGED4B	MAGE family member D4B [Source:HGNC Symbol;Acc:HGNC:22880]
ENSG00000120693	0.426219	-1.23033	1.31116e-05	4.5262e-05	yes	down	1.19	0.516667	1.06	1.39	1.12	0.55	0.65	0.35	SMAD9	SMAD family member 9 [Source:HGNC Symbol;Acc:HGNC:6774]
ENSG00000154451	3.08772	1.62654	1.32083e-05	4.55805e-05	yes	up	0.376667	1.47667	0.27	0.39	0.47	1.77	1.39	1.27	GBP5	guanylate binding protein 5 [Source:HGNC Symbol;Acc:HGNC:19895]
ENSG00000280355	2.16996	1.11767	1.34577e-05	4.63862e-05	yes	up	1.55	3.37667	1.55	1.26	1.84	3.5	3.24	3.39	AL132656.4	novel transcript
ENSG00000163053	0.435233	-1.20014	1.35175e-05	4.65844e-05	yes	down	2.55	1.29333	2.57	2.22	2.86	1.01	0.98	1.89	SLC16A14	solute carrier family 16 member 14 [Source:HGNC Symbol;Acc:HGNC:26417]
ENSG00000225234	2.39816	1.26193	1.38671e-05	4.77171e-05	yes	up	0.753333	1.50333	0.74	0.9	0.62	1.82	1.23	1.46	TRAPPC12-AS1	TRAPPC12 antisense RNA 1 [Source:HGNC Symbol;Acc:HGNC:41046]
ENSG00000275160	0.0137174	-6.18785	1.45381e-05	4.99087e-05	yes	down	2.40667	0	2.85	1.55	2.82	0	0	0	AL354718.1	ribosomal protein L7a (RPL7A) pseudogene
ENSG00000161544	14.7697	3.88457	1.45628e-05	4.99849e-05	yes	up	0.07	1.53	0.03	0.18	0	1.13	2.02	1.44	CYGB	cytoglobin [Source:HGNC Symbol;Acc:HGNC:16505]
ENSG00000180447	0.463556	-1.10918	1.61848e-05	5.52651e-05	yes	down	2.16333	1.02	2.01	2.37	2.11	1.1	1.14	0.82	GAS1	growth arrest specific 1 [Source:HGNC Symbol;Acc:HGNC:4165]
ENSG00000165716	0.311558	-1.68243	1.6681e-05	5.68836e-05	yes	down	1.57	0.51	1.81	1.82	1.08	0.41	0.72	0.4	DIPK1B	divergent protein kinase domain 1B [Source:HGNC Symbol;Acc:HGNC:28290]
ENSG00000233355	17.5417	4.13272	1.67791e-05	5.71896e-05	yes	up	0.05	1.85	0.01	0.13	0.01	1.97	1.66	1.92	CHRM3-AS2	CHRM3 antisense RNA 2 [Source:HGNC Symbol;Acc:HGNC:43725]
ENSG00000235109	2.15089	1.10494	1.6987e-05	5.78599e-05	yes	up	2.44	5.33333	2.38	2.4	2.54	6.17	4.82	5.01	ZSCAN31	zinc finger and SCAN domain containing 31 [Source:HGNC Symbol;Acc:HGNC:14097]
ENSG00000166321	0.429887	-1.21797	1.72679e-05	5.87581e-05	yes	down	2.88667	1.67667	3.22	2.52	2.92	2.02	1.18	1.83	NUDT13	nudix hydrolase 13 [Source:HGNC Symbol;Acc:HGNC:18827]
ENSG00000172602	3.23752	1.69489	1.78875e-05	6.07464e-05	yes	up	0.846667	2.83667	0.6	1.48	0.46	2.99	2.66	2.86	RND1	Rho family GTPase 1 [Source:HGNC Symbol;Acc:HGNC:18314]
ENSG00000138622	4.68405	2.22776	1.78922e-05	6.07512e-05	yes	up	0.0733333	0.333333	0.06	0.05	0.11	0.32	0.42	0.26	HCN4	hyperpolarization activated cyclic nucleotide gated potassium channel 4 [Source:HGNC Symbol;Acc:HGNC:16882]
ENSG00000216937	2.29617	1.19923	1.79266e-05	6.08577e-05	yes	up	1.4	2.09667	1.61	0.9	1.69	2.71	1.82	1.76	CCDC7	coiled-coil domain containing 7 [Source:HGNC Symbol;Acc:HGNC:26533]
ENSG00000127578	6.97394	2.80197	1.89564e-05	6.42757e-05	yes	up	0.0733333	0.54	0.05	0.13	0.04	0.53	0.59	0.5	WFIKKN1	WAP, follistatin/kazal, immunoglobulin, kunitz and netrin domain containing 1 [Source:HGNC Symbol;Acc:HGNC:30912]
ENSG00000161958	3.40524	1.76776	1.932e-05	6.54254e-05	yes	up	0.473333	1.68667	0.4	0.47	0.55	1.92	1.11	2.03	FGF11	fibroblast growth factor 11 [Source:HGNC Symbol;Acc:HGNC:3667]
ENSG00000078319	0.370373	-1.43295	1.9683e-05	6.65996e-05	yes	down	4.07	1.57333	4.4	4.1	3.71	1.27	1.37	2.08	PMS2P1	PMS1 homolog 2, mismatch repair system component pseudogene 1 [Source:HGNC Symbol;Acc:HGNC:9123]
ENSG00000274425	2.0056	1.00403	2.02297e-05	6.83705e-05	yes	up	1.48333	3.19667	1.42	1.35	1.68	2.72	2.95	3.92	AC114271.1	novel transcript, antisense to ICAM3
ENSG00000175445	0.0616661	-4.01938	2.04503e-05	6.90816e-05	yes	down	0.44	0.05	0.29	0.47	0.56	0.03	0	0.12	LPL	lipoprotein lipase [Source:HGNC Symbol;Acc:HGNC:6677]
ENSG00000238105	2.62752	1.3937	2.04855e-05	6.91893e-05	yes	up	0.553333	1.07333	0.32	0.59	0.75	0.93	1.03	1.26	GOLGA2P5	GOLGA2 pseudogene 5 [Source:HGNC Symbol;Acc:HGNC:25315]
ENSG00000164604	0.310201	-1.68872	2.07755e-05	7.01338e-05	yes	down	22.7533	0.42	1.11	56.6	10.55	0.65	0.28	0.33	GPR85	G protein-coupled receptor 85 [Source:HGNC Symbol;Acc:HGNC:4536]
ENSG00000255893	0.0859247	-3.54078	2.26989e-05	7.63127e-05	yes	down	4.34667	0.376667	2.59	6.63	3.82	0.4	0.55	0.18	AP000786.1	novel transcript
ENSG00000266401	5.08748	2.34695	2.34393e-05	7.86728e-05	yes	up	0.483333	2.33333	0.47	0.26	0.72	2.76	2.58	1.66	AP002478.1	novel transcript, antisense to DLGAP1
ENSG00000231873	34.3765	5.10335	2.37312e-05	7.96133e-05	yes	up	0.1	3.51	0	0.3	0	2.23	3.12	5.18	AC099560.1	novel transcript
ENSG00000226380	0.475579	-1.07224	2.4008e-05	8.05022e-05	yes	down	2.21333	0.823333	2.42	1.72	2.5	0.82	1.04	0.61	AC016831.1	novel transcript
ENSG00000005471	2.69948	1.43268	2.40689e-05	8.06799e-05	yes	up	0.746667	1.21	0.44	0.37	1.43	1.04	1.53	1.06	ABCB4	ATP binding cassette subfamily B member 4 [Source:HGNC Symbol;Acc:HGNC:45]
ENSG00000138741	0.206732	-2.27417	2.43817e-05	8.16752e-05	yes	down	0.516667	0.103333	0.41	0.52	0.62	0.12	0.07	0.12	TRPC3	transient receptor potential cation channel subfamily C member 3 [Source:HGNC Symbol;Acc:HGNC:12335]
ENSG00000079385	13.808	3.78744	2.47952e-05	8.30196e-05	yes	up	0.0533333	0.786667	0.11	0.05	0	1.49	0.54	0.33	CEACAM1	carcinoembryonic antigen related cell adhesion molecule 1 [Source:HGNC Symbol;Acc:HGNC:1814]
ENSG00000214872	69.1557	6.11178	2.51764e-05	8.42133e-05	yes	up	0	1.78	0	0	0	1.22	1.24	2.88	SMTNL1	smoothelin like 1 [Source:HGNC Symbol;Acc:HGNC:32394]
ENSG00000100055	2.76558	1.46758	2.53121e-05	8.46533e-05	yes	up	0.796667	1.72	0.47	1.21	0.71	1.94	1.77	1.45	CYTH4	cytohesin 4 [Source:HGNC Symbol;Acc:HGNC:9505]
ENSG00000224376	7.31322	2.87051	2.56275e-05	8.56663e-05	yes	up	0.283333	1.74667	0.3	0	0.55	1.88	1.56	1.8	AC017104.1	novel transcript
ENSG00000223552	32.9599	5.04264	2.67666e-05	8.93573e-05	yes	up	0.143333	1.56333	0	0.43	0	1.2	1.82	1.67	AC098613.1	novel transcript
ENSG00000151006	2.0898	1.06336	2.75708e-05	9.1922e-05	yes	up	0.626667	2.17333	0.6	0.55	0.73	2.07	2.2	2.25	PRSS53	serine protease 53 [Source:HGNC Symbol;Acc:HGNC:34407]
ENSG00000115919	3.96745	1.98821	2.77394e-05	9.24542e-05	yes	up	0.24	0.613333	0.1	0.57	0.05	0.59	0.79	0.46	KYNU	kynureninase [Source:HGNC Symbol;Acc:HGNC:6469]
ENSG00000004799	3.47104	1.79537	2.91266e-05	9.69515e-05	yes	up	0.28	0.79	0.19	0.27	0.38	0.76	0.88	0.73	PDK4	pyruvate dehydrogenase kinase 4 [Source:HGNC Symbol;Acc:HGNC:8812]
ENSG00000179841	0.323625	-1.62761	2.93958e-05	9.7784e-05	yes	down	0.513333	0.193333	0.53	0.58	0.43	0.16	0.22	0.2	AKAP5	A-kinase anchoring protein 5 [Source:HGNC Symbol;Acc:HGNC:375]
ENSG00000180044	0.286566	-1.80306	2.98308e-05	9.91503e-05	yes	down	1.11	0.323333	1.44	0.93	0.96	0.27	0.36	0.34	C3orf80	chromosome 3 open reading frame 80 [Source:HGNC Symbol;Acc:HGNC:40048]
ENSG00000249087	2.41689	1.27315	3.02838e-05	0.000100623	yes	up	1.24667	3.26333	0.9	1.06	1.78	3.18	3.13	3.48	ZNF436-AS1	ZNF436 antisense RNA 1 [Source:HGNC Symbol;Acc:HGNC:25122]
ENSG00000121207	0.159469	-2.64866	3.04953e-05	0.00010126	yes	down	0.36	0.203333	0.4	0.27	0.41	0.48	0.06	0.07	LRAT	lecithin retinol acyltransferase [Source:HGNC Symbol;Acc:HGNC:6685]
ENSG00000284431	2.12623	1.0883	3.16418e-05	0.000104846	yes	up	1.50333	3.22	1.99	0.77	1.75	3.53	2.7	3.43	AL022238.4	novel transcript
ENSG00000136059	0.465125	-1.10431	3.16816e-05	0.000104944	yes	down	3.02667	1.47	2.76	3.45	2.87	1.55	1.47	1.39	VILL	villin like [Source:HGNC Symbol;Acc:HGNC:30906]
ENSG00000125845	2.36993	1.24484	3.22203e-05	0.000106677	yes	up	0.663333	1.58333	0.57	0.5	0.92	1.65	1.54	1.56	BMP2	bone morphogenetic protein 2 [Source:HGNC Symbol;Acc:HGNC:1069]
ENSG00000182685	2.2359	1.16086	3.2263e-05	0.000106784	yes	up	3.68	6.44333	2.1	6.61	2.33	4.21	10.98	4.14	BRICD5	BRICHOS domain containing 5 [Source:HGNC Symbol;Acc:HGNC:28309]
ENSG00000267500	0.159295	-2.65023	3.24061e-05	0.000107223	yes	down	1.38667	0.223333	1.14	1.27	1.75	0.22	0.24	0.21	ZNF887P	zinc finger protein 887, pseudogene [Source:HGNC Symbol;Acc:HGNC:38700]
ENSG00000186827	13.0798	3.70927	3.25377e-05	0.000107623	yes	up	0.54	1.53	0	0.07	1.55	1.7	1.13	1.76	TNFRSF4	TNF receptor superfamily member 4 [Source:HGNC Symbol;Acc:HGNC:11918]
ENSG00000089127	2.55203	1.35164	3.2572e-05	0.000107707	yes	up	1.24	3.51333	0.88	1.17	1.67	3.85	4.03	2.66	OAS1	2'-5'-oligoadenylate synthetase 1 [Source:HGNC Symbol;Acc:HGNC:8086]
ENSG00000270316	66.05	6.04549	3.26514e-05	0.000107947	yes	up	0	0.316667	0	0	0	0.29	0.45	0.21	BORCS7-ASMT	BORCS7-ASMT readthrough (NMD candidate) [Source:HGNC Symbol;Acc:HGNC:49183]
ENSG00000279069	0.282729	-1.82251	3.32295e-05	0.000109717	yes	down	2.11333	0.603333	2.2	2.55	1.59	0.64	0.68	0.49	AC015813.5	novel transcript
ENSG00000203772	3.59089	1.84434	3.36652e-05	0.000111119	yes	up	0.263333	1.01667	0.41	0.23	0.15	0.81	0.96	1.28	SPRN	shadow of prion protein [Source:HGNC Symbol;Acc:HGNC:16871]
ENSG00000116574	0.388928	-1.36243	3.41588e-05	0.000112658	yes	down	1.34667	0.516667	1.26	1.24	1.54	0.51	0.71	0.33	RHOU	ras homolog family member U [Source:HGNC Symbol;Acc:HGNC:17794]
ENSG00000224769	3.78748	1.92124	3.42714e-05	0.000112975	yes	up	0.406667	1.45333	0.57	0.36	0.29	1.9	1.57	0.89	MUC20P1	mucin 20, cell surface associated pseudogene 1 [Source:HGNC Symbol;Acc:HGNC:51921]
ENSG00000284554	67.0514	6.0672	3.4436e-05	0.000113499	yes	up	0	0.363333	0	0	0	0.19	0.39	0.51	AL022318.4	novel protein
ENSG00000117152	0.304803	-1.71405	3.46959e-05	0.000114319	yes	down	2.51333	0.92	2.31	2.67	2.56	0.89	0.87	1	RGS4	regulator of G protein signaling 4 [Source:HGNC Symbol;Acc:HGNC:10000]
ENSG00000171084	0.409733	-1.28725	3.49662e-05	0.000115117	yes	down	2.72	1.16667	2.61	2.76	2.79	0.95	1.2	1.35	FAM86JP	family with sequence similarity 86 member J, pseudogene [Source:HGNC Symbol;Acc:HGNC:44097]
ENSG00000271936	0.266201	-1.90941	3.53497e-05	0.000116212	yes	down	3.18667	0.866667	3.32	2.04	4.2	1.11	0.68	0.81	AC012073.1	novel transcript, antisense to ADCY3
ENSG00000236064	2.73826	1.45326	3.75108e-05	0.000123	yes	up	1.1	3.08333	1.05	1.28	0.97	3.14	3.3	2.81	AL034399.2	novel transcript, antisense to MID2
ENSG00000144792	0.341411	-1.55042	3.91866e-05	0.000128269	yes	down	0.86	0.226667	0.5	1.24	0.84	0.25	0.15	0.28	ZNF660	zinc finger protein 660 [Source:HGNC Symbol;Acc:HGNC:26720]
ENSG00000058335	0.441977	-1.17796	3.92797e-05	0.000128553	yes	down	2.09667	1.08	2.11	2.31	1.87	0.83	1.47	0.94	RASGRF1	Ras protein specific guanine nucleotide releasing factor 1 [Source:HGNC Symbol;Acc:HGNC:9875]
ENSG00000188760	2.41224	1.27037	4.02853e-05	0.00013176	yes	up	1.18667	2.47333	0.74	1.78	1.04	2.83	2.22	2.37	TMEM198	transmembrane protein 198 [Source:HGNC Symbol;Acc:HGNC:33704]
ENSG00000173258	2.4429	1.2886	4.03866e-05	0.000132071	yes	up	0.93	1.69333	1.04	1.09	0.66	1.73	1.61	1.74	ZNF483	zinc finger protein 483 [Source:HGNC Symbol;Acc:HGNC:23384]
ENSG00000278922	4.25812	2.09022	4.05293e-05	0.000132516	yes	up	0.46	1.96333	0.35	0.38	0.65	2.41	2	1.48	AC002310.6	novel transcript
ENSG00000285103	3.14433	1.65275	4.11075e-05	0.000134299	yes	up	0.133333	0.386667	0.09	0.15	0.16	0.42	0.47	0.27	AL451123.1	novel transcript
ENSG00000179698	2.77389	1.47191	4.16113e-05	0.00013588	yes	up	0.323333	0.923333	0.35	0.36	0.26	0.85	0.82	1.1	WDR97	WD repeat domain 97 [Source:HGNC Symbol;Acc:HGNC:26959]
ENSG00000282936	2.40366	1.26523	4.20047e-05	0.000137143	yes	up	0.553333	1.36	0.68	0.5	0.48	1.42	1.28	1.38	AC004706.3	TEC
ENSG00000178718	0.256605	-1.96238	4.24192e-05	0.000138474	yes	down	0.893333	0.233333	0.82	0.8	1.06	0.31	0.29	0.1	RPP25	ribonuclease P and MRP subunit p25 [Source:HGNC Symbol;Acc:HGNC:30361]
ENSG00000253485	0.116831	-3.0975	4.28722e-05	0.000139864	yes	down	0.306667	0.0433333	0.34	0.3	0.28	0.02	0.06	0.05	PCDHGA5	protocadherin gamma subfamily A, 5 [Source:HGNC Symbol;Acc:HGNC:8703]
ENSG00000170214	2.4152	1.27214	4.42127e-05	0.000144099	yes	up	0.856667	2.04667	0.8	0.9	0.87	2.1	1.69	2.35	ADRA1B	adrenoceptor alpha 1B [Source:HGNC Symbol;Acc:HGNC:278]
ENSG00000257906	16.1001	4.009	4.47987e-05	0.000145916	yes	up	0.0266667	0.583333	0.04	0.04	0	0.25	0.73	0.77	LINC02156	long intergenic non-protein coding RNA 2156 [Source:HGNC Symbol;Acc:HGNC:53017]
ENSG00000277182	3.67094	1.87615	4.60594e-05	0.000149761	yes	up	0.33	1.25333	0.34	0.34	0.31	1.14	1.39	1.23	AC006449.5	novel transcript, antisense to PCGF2
ENSG00000163121	30.7058	4.94044	4.60795e-05	0.000149799	yes	up	0.0366667	0.946667	0.04	0.07	0	0.93	0.65	1.26	NEURL3	neuralized E3 ubiquitin protein ligase 3 [Source:HGNC Symbol;Acc:HGNC:25162]
ENSG00000226328	0.469795	-1.0899	4.65385e-05	0.000151222	yes	down	5.24	1.83667	4.84	5.73	5.15	2.04	2	1.47	NUP50-DT	NUP50 divergent transcript [Source:HGNC Symbol;Acc:HGNC:50502]
ENSG00000100314	2.20083	1.13805	4.67301e-05	0.000151818	yes	up	1.20333	2.68333	0.83	1.25	1.53	2.23	2.09	3.73	CABP7	calcium binding protein 7 [Source:HGNC Symbol;Acc:HGNC:20834]
ENSG00000140835	0.0211453	-5.56352	4.72638e-05	0.000153482	yes	down	0.603333	0.0166667	0.4	0.62	0.79	0	0.05	0	CHST4	carbohydrate sulfotransferase 4 [Source:HGNC Symbol;Acc:HGNC:1972]
ENSG00000132000	4.75083	2.24818	4.74963e-05	0.000154163	yes	up	0.516667	1.31667	0.53	0.6	0.42	1.07	1.3	1.58	PODNL1	podocan like 1 [Source:HGNC Symbol;Acc:HGNC:26275]
ENSG00000164362	0.143181	-2.80408	4.86828e-05	0.000157914	yes	down	0.99	0.0933333	0.6	1.86	0.51	0.14	0.11	0.03	TERT	telomerase reverse transcriptase [Source:HGNC Symbol;Acc:HGNC:11730]
ENSG00000169668	2.95743	1.56434	4.89661e-05	0.000158683	yes	up	0.666667	2.01667	0.6	0.55	0.85	2.43	1.6	2.02	BCRP2	breakpoint cluster region pseudogene 2 [Source:HGNC Symbol;Acc:HGNC:1015]
ENSG00000143450	3.47847	1.79845	4.91835e-05	0.000159337	yes	up	1.10333	2.11	0.38	1.61	1.32	2.46	1.95	1.92	OAZ3	ornithine decarboxylase antizyme 3 [Source:HGNC Symbol;Acc:HGNC:8097]
ENSG00000251257	2.42298	1.27678	5.06242e-05	0.000163745	yes	up	3.53333	8.28667	4.03	3.86	2.71	8.44	8.04	8.38	AC010457.1	novel transcript
ENSG00000279347	0.0153174	-6.02868	5.10057e-05	0.000164927	yes	down	0.496667	0	0.42	0.88	0.19	0	0	0	AC021945.1	TEC
ENSG00000250917	5.90738	2.56252	5.16982e-05	0.000167061	yes	up	0.186667	0.566667	0.01	0.07	0.48	0.26	0.87	0.57	AL035458.2	novel transcript, overlapping AHCY
ENSG00000204248	2.67557	1.41985	5.2904e-05	0.000170769	yes	up	0.31	0.936667	0.27	0.25	0.41	0.8	0.85	1.16	COL11A2	collagen type XI alpha 2 chain [Source:HGNC Symbol;Acc:HGNC:2187]
ENSG00000267740	0.358165	-1.4813	5.39108e-05	0.000173936	yes	down	3.63667	2.32667	2.8	4.11	4	1.69	2.78	2.51	AC024592.3	novel protein
ENSG00000277632	29.6407	4.88951	5.50478e-05	0.000177465	yes	up	0.0666667	2.10667	0.09	0.11	0	1.95	2.56	1.81	CCL3	C-C motif chemokine ligand 3 [Source:HGNC Symbol;Acc:HGNC:10627]
ENSG00000168772	2.67917	1.42179	5.64281e-05	0.000181686	yes	up	0.26	2.94333	0.33	0.29	0.16	0.79	0.69	7.35	CXXC4	CXXC finger protein 4 [Source:HGNC Symbol;Acc:HGNC:24593]
ENSG00000244588	2.95358	1.56246	5.66306e-05	0.000182281	yes	up	0.433333	0.906667	0.44	0.19	0.67	0.5	1	1.22	RAD21L1	RAD21 cohesin complex component like 1 [Source:HGNC Symbol;Acc:HGNC:16271]
ENSG00000167880	0.431669	-1.212	5.72775e-05	0.000184247	yes	down	1.00333	0.486667	0.74	0.79	1.48	0.48	0.68	0.3	EVPL	envoplakin [Source:HGNC Symbol;Acc:HGNC:3503]
ENSG00000155666	0.350255	-1.51352	5.75992e-05	0.000185166	yes	down	2.52667	1.31	1.53	2.82	3.23	1.27	1.66	1	KDM8	lysine demethylase 8 [Source:HGNC Symbol;Acc:HGNC:25840]
ENSG00000270804	2.40569	1.26645	5.93752e-05	0.000190576	yes	up	3.39667	7.43	5.15	2.37	2.67	7.26	8.28	6.75	AC010326.4	ubiquitin-conjugating enzyme E2C (UBE2C) pseudogene
ENSG00000272622	3.45654	1.78933	5.98096e-05	0.00019185	yes	up	0.313333	0.826667	0.2	0.1	0.64	0.79	0.57	1.12	AC010735.2	novel transcript
ENSG00000230148	2.29856	1.20073	6.27541e-05	0.000200729	yes	up	5.02333	11.46	5.37	3.7	6	11.29	12.04	11.05	HOXB-AS1	HOXB cluster antisense RNA 1 [Source:HGNC Symbol;Acc:HGNC:43744]
ENSG00000226232	3.86588	1.9508	6.39034e-05	0.000204182	yes	up	0.77	2.91333	0.7	0.35	1.26	3.32	2.39	3.03	NPIPB14P	nuclear pore complex interacting protein family member B14, pseudogene [Source:HGNC Symbol;Acc:HGNC:41990]
ENSG00000224892	8.92375	3.15765	6.47327e-05	0.00020667	yes	up	0.276667	2.65333	0.48	0.1	0.25	1.47	3.29	3.2	RPS4XP16	ribosomal protein S4X pseudogene 16 [Source:HGNC Symbol;Acc:HGNC:36365]
ENSG00000124602	11.0795	3.46982	6.4757e-05	0.000206716	yes	up	0.0366667	0.366667	0	0.09	0.02	0.42	0.37	0.31	UNC5CL	unc-5 family C-terminal like [Source:HGNC Symbol;Acc:HGNC:21203]
ENSG00000225828	3.07775	1.62187	6.52269e-05	0.000208183	yes	up	0.893333	2.91667	0.83	1.22	0.63	4.78	2.91	1.06	FAM229A	family with sequence similarity 229 member A [Source:HGNC Symbol;Acc:HGNC:44652]
ENSG00000260287	3.53728	1.82264	6.57992e-05	0.000209879	yes	up	0.376667	1.36667	0.44	0.43	0.26	1.57	1.08	1.45	TBC1D3G	TBC1 domain family member 3G [Source:HGNC Symbol;Acc:HGNC:29860]
ENSG00000186399	2.70648	1.43642	6.59664e-05	0.00021038	yes	up	0.553333	1.82	0.54	0.5	0.62	2.45	1.39	1.62	GOLGA8R	golgin A8 family member R [Source:HGNC Symbol;Acc:HGNC:44407]
ENSG00000233589	0.0532592	-4.23082	6.82441e-05	0.000217204	yes	down	1.54	0.09	1.01	1.53	2.08	0	0.1	0.17	AL138789.1	novel transcript
ENSG00000168806	0.407969	-1.29347	6.88833e-05	0.000218966	yes	down	1.56667	0.54	1.51	2	1.19	0.33	0.18	1.11	LCMT2	leucine carboxyl methyltransferase 2 [Source:HGNC Symbol;Acc:HGNC:17558]
ENSG00000232618	9.48314	3.24536	7.26007e-05	0.000230425	yes	up	0.26	2.03667	0.23	0.45	0.1	2.66	1.46	1.99	AL355304.1	novel transcript
ENSG00000128052	0.410566	-1.28431	7.27328e-05	0.000230773	yes	down	0.693333	0.296667	0.72	0.65	0.71	0.3	0.36	0.23	KDR	kinase insert domain receptor [Source:HGNC Symbol;Acc:HGNC:6307]
ENSG00000115423	0.360826	-1.47062	7.31368e-05	0.000231911	yes	down	0.396667	0.123333	0.43	0.43	0.33	0.12	0.15	0.1	DNAH6	dynein axonemal heavy chain 6 [Source:HGNC Symbol;Acc:HGNC:2951]
ENSG00000184163	6.68471	2.74086	7.7846e-05	0.000246348	yes	up	0.503333	3.68667	0.26	0.67	0.58	3.86	3.12	4.08	C1QTNF12	C1q and TNF related 12 [Source:HGNC Symbol;Acc:HGNC:32308]
ENSG00000168497	0.291632	-1.77778	8.27707e-05	0.000261125	yes	down	0.943333	0.273333	0.75	0.91	1.17	0.28	0.16	0.38	CAVIN2	caveolae associated protein 2 [Source:HGNC Symbol;Acc:HGNC:10690]
ENSG00000244731	3.49014	1.80329	8.43112e-05	0.000265781	yes	up	0.72	2.47	0.72	0.96	0.48	1.17	3.71	2.53	C4A	complement C4A (Rodgers blood group) [Source:HGNC Symbol;Acc:HGNC:1323]
ENSG00000229474	3.4587	1.79023	8.76568e-05	0.000275733	yes	up	1.03333	3.06667	0.96	0.41	1.73	3.06	2.83	3.31	PATL2	PAT1 homolog 2 [Source:HGNC Symbol;Acc:HGNC:33630]
ENSG00000103196	0.183003	-2.45006	8.8483e-05	0.000278247	yes	down	0.533333	0.09	0.72	0.31	0.57	0.07	0.06	0.14	CRISPLD2	cysteine rich secretory protein LCCL domain containing 2 [Source:HGNC Symbol;Acc:HGNC:25248]
ENSG00000260566	0.410715	-1.28379	8.86414e-05	0.000278702	yes	down	1.64667	0.686667	1.67	1.57	1.7	0.54	0.59	0.93	AC127459.1	novel transcript
ENSG00000077616	2.354	1.23512	9.18892e-05	0.000288338	yes	up	0.773333	1.74	0.88	0.74	0.7	1.9	1.83	1.49	NAALAD2	N-acetylated alpha-linked acidic dipeptidase 2 [Source:HGNC Symbol;Acc:HGNC:14526]
ENSG00000146221	58.0981	5.86042	9.3163e-05	0.000292245	yes	up	0	0.24	0	0	0	0.27	0.13	0.32	TCTE1	t-complex-associated-testis-expressed 1 [Source:HGNC Symbol;Acc:HGNC:11693]
ENSG00000179761	13.9219	3.79929	0.000100854	0.000315503	yes	up	0.08	1.05	0.05	0	0.19	0.88	0.63	1.64	PIPOX	pipecolic acid and sarcosine oxidase [Source:HGNC Symbol;Acc:HGNC:17804]
ENSG00000105650	56.3946	5.81748	0.000101117	0.000316178	yes	up	0	0.44	0	0	0	0.27	0.33	0.72	PDE4C	phosphodiesterase 4C [Source:HGNC Symbol;Acc:HGNC:8782]
ENSG00000286132	0.371239	-1.42958	0.000103225	0.000322379	yes	down	0.903333	0.323333	0.84	0.96	0.91	0.33	0.37	0.27	AC022415.2	novel protein
ENSG00000272657	3.80378	1.92743	0.000104532	0.00032606	yes	up	0.306667	0.72	0.55	0.12	0.25	0.95	0.6	0.61	AP000317.2	novel transcript
ENSG00000177096	0.446147	-1.16441	0.000104624	0.000326298	yes	down	2.42667	1.16667	2.36	2.61	2.31	0.72	1.18	1.6	PHETA2	PH domain containing endocytic trafficking adaptor 2 [Source:HGNC Symbol;Acc:HGNC:27161]
ENSG00000130270	0.462369	-1.11288	0.000104796	0.000326736	yes	down	2.35333	0.973333	2.27	2.13	2.66	0.78	1.24	0.9	ATP8B3	ATPase phospholipid transporting 8B3 [Source:HGNC Symbol;Acc:HGNC:13535]
ENSG00000280064	2.30595	1.20536	0.000106436	0.000331446	yes	up	0.83	1.97333	0.88	0.85	0.76	1.8	2.07	2.05	AC130304.1	novel transcript
ENSG00000205129	4.82425	2.2703	0.000107058	0.000333179	yes	up	0.473333	2.58	0.17	0.79	0.46	2.49	2.87	2.38	C4orf47	chromosome 4 open reading frame 47 [Source:HGNC Symbol;Acc:HGNC:34346]
ENSG00000224420	2.77898	1.47456	0.000109053	0.000339029	yes	up	0.786667	2.21	0.95	0.73	0.68	1.86	2.73	2.04	ADM5	adrenomedullin 5 (putative) [Source:HGNC Symbol;Acc:HGNC:27293]
ENSG00000220201	5.45728	2.44818	0.00011499	0.000356511	yes	up	0.256667	1.26333	0.48	0.19	0.1	1.89	1.19	0.71	ZGLP1	zinc finger, GATA-like protein 1 [Source:HGNC Symbol;Acc:HGNC:37245]
ENSG00000214274	2.2557	1.17358	0.000117861	0.000365191	yes	up	2.25667	5.12333	2.51	1.92	2.34	3.86	5.43	6.08	ANG	angiogenin [Source:HGNC Symbol;Acc:HGNC:483]
ENSG00000129028	0.466571	-1.09983	0.000122223	0.000378133	yes	down	3.33333	1.57667	2.44	3.33	4.23	1.68	1.78	1.27	THAP10	THAP domain containing 10 [Source:HGNC Symbol;Acc:HGNC:23193]
ENSG00000258472	2.22307	1.15256	0.00012361	0.000382195	yes	up	1.25667	2.81	1.74	1.03	1	2.36	2.95	3.12	AC005726.1	novel protein
ENSG00000187105	6.91505	2.78974	0.000127247	0.000392906	yes	up	0.323333	2.99333	0	0.5	0.47	3.37	2.91	2.7	HEATR4	HEAT repeat containing 4 [Source:HGNC Symbol;Acc:HGNC:16761]
ENSG00000278619	0.498781	-1.00352	0.000128609	0.000396752	yes	down	3.52	1.75667	3.5	3.26	3.8	1.62	1.89	1.76	MRM1	mitochondrial rRNA methyltransferase 1 [Source:HGNC Symbol;Acc:HGNC:26202]
ENSG00000197405	3.05984	1.61346	0.0001286	0.000396752	yes	up	0.573333	1.59333	0.35	1.02	0.35	1.12	1.38	2.28	C5AR1	complement C5a receptor 1 [Source:HGNC Symbol;Acc:HGNC:1338]
ENSG00000167105	0.456251	-1.1321	0.000129269	0.000398489	yes	down	1.97	0.92	2.06	2.07	1.78	1.15	0.89	0.72	TMEM92	transmembrane protein 92 [Source:HGNC Symbol;Acc:HGNC:26579]
ENSG00000115507	0.480757	-1.05662	0.000129646	0.000399591	yes	down	2.25667	1.09	2.17	2.25	2.35	1.27	1.08	0.92	OTX1	orthodenticle homeobox 1 [Source:HGNC Symbol;Acc:HGNC:8521]
ENSG00000259863	2.46933	1.30412	0.000129762	0.000399887	yes	up	1.36333	3.39333	1.15	1.27	1.67	2.14	3.82	4.22	SH3RF3-AS1	SH3RF3 antisense RNA 1 [Source:HGNC Symbol;Acc:HGNC:44168]
ENSG00000110848	11.0829	3.47026	0.000130812	0.000403001	yes	up	0.0833333	0.8	0.03	0.04	0.18	1.02	0.82	0.56	CD69	CD69 molecule [Source:HGNC Symbol;Acc:HGNC:1694]
ENSG00000267757	2.57147	1.36259	0.000131199	0.000404133	yes	up	2.40333	6.72	2.47	2.7	2.04	7.31	6.55	6.3	EML2-AS1	EML2 antisense RNA 1 [Source:HGNC Symbol;Acc:HGNC:48331]
ENSG00000105963	2.12224	1.08559	0.000133423	0.000410676	yes	up	1.23	3.72	1.39	1.35	0.95	3.91	2.71	4.54	ADAP1	ArfGAP with dual PH domains 1 [Source:HGNC Symbol;Acc:HGNC:16486]
ENSG00000259354	56.0017	5.8074	0.000138135	0.000424542	yes	up	0	0.37	0	0	0	0.15	0.75	0.21	AC025580.2	novel transcript, antisense to SLC30A4
ENSG00000214967	0.294789	-1.76225	0.000140275	0.000430895	yes	down	16.5	4.08667	15.88	16.59	17.03	1.44	3.54	7.28	NPIPA7	nuclear pore complex interacting protein family member A7 [Source:HGNC Symbol;Acc:HGNC:41982]
ENSG00000279529	2.40961	1.2688	0.000140815	0.000432454	yes	up	0.81	2.52333	0.73	0.89	0.81	2.8	2.97	1.8	AC008764.8	novel transcript, antisense to MED26
ENSG00000145020	2.15521	1.10783	0.000147345	0.000451559	yes	up	1.35	2.82333	1.34	1.58	1.13	2.79	3.54	2.14	AMT	aminomethyltransferase [Source:HGNC Symbol;Acc:HGNC:473]
ENSG00000182511	0.298544	-1.74399	0.000150478	0.000460473	yes	down	1.31333	0.413333	1.07	1.13	1.74	0.22	0.36	0.66	FES	FES proto-oncogene, tyrosine kinase [Source:HGNC Symbol;Acc:HGNC:3657]
ENSG00000172543	2.59725	1.37698	0.000151136	0.000462348	yes	up	1.41	3.22667	1.23	1.49	1.51	3.01	3.65	3.02	CTSW	cathepsin W [Source:HGNC Symbol;Acc:HGNC:2546]
ENSG00000273184	2.09622	1.06779	0.000151911	0.000464509	yes	up	0.906667	1.84667	1.04	0.79	0.89	1.15	2.89	1.5	AC010655.4	novel transcript, readthrough between HILPDA-METTL2B
ENSG00000276509	2.48893	1.31552	0.00015216	0.000465202	yes	up	0.786667	1.98667	0.81	0.79	0.76	1.79	2.19	1.98	AC239799.1	novel transcript
ENSG00000135722	2.30419	1.20426	0.000154823	0.00047285	yes	up	2.16	5.48667	0.99	2.7	2.79	4.59	5.42	6.45	FBXL8	F-box and leucine rich repeat protein 8 [Source:HGNC Symbol;Acc:HGNC:17875]
ENSG00000136244	3.71583	1.89368	0.000155693	0.000475435	yes	up	1	4.52	0.61	1.25	1.14	4.6	3.86	5.1	IL6	interleukin 6 [Source:HGNC Symbol;Acc:HGNC:6018]
ENSG00000184702	0.364877	-1.45452	0.000156136	0.000476717	yes	down	2.03667	0.733333	1.69	2.38	2.04	0.66	1.08	0.46	2020-09-05	septin 5 [Source:HGNC Symbol;Acc:HGNC:9164]
ENSG00000254122	0.267918	-1.90013	0.000159679	0.00048688	yes	down	0.466667	0.13	0.58	0.33	0.49	0.11	0.11	0.17	PCDHGB7	protocadherin gamma subfamily B, 7 [Source:HGNC Symbol;Acc:HGNC:8714]
ENSG00000249476	5.96321	2.57609	0.000159818	0.000487233	yes	up	0.05	0.283333	0.05	0.01	0.09	0.27	0.23	0.35	AC008467.1	novel transcript
ENSG00000247081	2.02411	1.01729	0.000160571	0.000489383	yes	up	5.57667	11.5233	5.2	5.27	6.26	12.47	12.42	9.68	BAALC-AS1	BAALC antisense RNA 1 [Source:HGNC Symbol;Acc:HGNC:50461]
ENSG00000133135	2.07053	1.05	0.000162717	0.000495702	yes	up	1.01667	2.13667	1.1	0.81	1.14	2.25	1.79	2.37	RNF128	ring finger protein 128, E3 ubiquitin protein ligase [Source:HGNC Symbol;Acc:HGNC:21153]
ENSG00000166578	2.95681	1.56404	0.000169246	0.000514597	yes	up	0.633333	1.79667	0.58	0.63	0.69	1.99	1.61	1.79	IQCD	IQ motif containing D [Source:HGNC Symbol;Acc:HGNC:25168]
ENSG00000130948	17.0921	4.09526	0.000169328	0.00051477	yes	up	0.106667	1.89333	0.14	0	0.18	1.2	1.53	2.95	HSD17B3	hydroxysteroid 17-beta dehydrogenase 3 [Source:HGNC Symbol;Acc:HGNC:5212]
ENSG00000234546	2.59269	1.37445	0.000169586	0.000515479	yes	up	2.93	7.55333	1.65	5.74	1.4	9.86	6.15	6.65	LNCTAM34A	long non coding transcriptional activator of miR34a [Source:HGNC Symbol;Acc:HGNC:52548]
ENSG00000258701	2.98266	1.5766	0.000170352	0.00051773	yes	up	0.386667	1.16333	0.34	0.38	0.44	1.38	1.13	0.98	LINC00638	long intergenic non-protein coding RNA 638 [Source:HGNC Symbol;Acc:HGNC:28325]
ENSG00000107719	0.131664	-2.92507	0.000173745	0.00052757	yes	down	0.3	0.04	0.33	0.16	0.41	0.01	0.08	0.03	PALD1	phosphatase domain containing paladin 1 [Source:HGNC Symbol;Acc:HGNC:23530]
ENSG00000236255	2.82183	1.49663	0.00017505	0.000531377	yes	up	0.683333	1.97	0.55	0.78	0.72	1.97	2.59	1.35	AC009404.1	novel transcript
ENSG00000261487	5.01163	2.32528	0.000175606	0.000532906	yes	up	1.01667	5.09667	0.49	1.03	1.53	4.98	7.75	2.56	AC135048.1	novel transcript
ENSG00000268223	3.63932	1.86367	0.000178729	0.000541903	yes	up	0.266667	1.45	0.16	0.35	0.29	0.71	2.38	1.26	ARL14EPL	ADP ribosylation factor like GTPase 14 effector protein like [Source:HGNC Symbol;Acc:HGNC:44201]
ENSG00000174529	4.77967	2.25691	0.000183069	0.000554649	yes	up	0.363333	1.68667	0.37	0.09	0.63	1.96	1.95	1.15	TMEM81	transmembrane protein 81 [Source:HGNC Symbol;Acc:HGNC:32349]
ENSG00000078081	2.14817	1.10311	0.000184874	0.00055987	yes	up	0.876667	2.84667	0.8	0.7	1.13	2.48	2.49	3.57	LAMP3	lysosomal associated membrane protein 3 [Source:HGNC Symbol;Acc:HGNC:14582]
ENSG00000261534	3.22806	1.69067	0.000185703	0.000562298	yes	up	0.21	0.676667	0.25	0.2	0.18	0.63	0.82	0.58	AL596244.1	novel transcript, overlapping TTLL11
ENSG00000261762	0.315491	-1.66433	0.000186596	0.000564834	yes	down	1.35	0.433333	1.8	0.94	1.31	0.42	0.42	0.46	AC027228.2	novel transcript, antisense to CHRNA5
ENSG00000187699	0.487185	-1.03746	0.000203022	0.000612206	yes	down	1.46	1.29333	1.5	1.42	1.46	0.89	1.47	1.52	C2orf88	chromosome 2 open reading frame 88 [Source:HGNC Symbol;Acc:HGNC:28191]
ENSG00000167614	17.2533	4.1088	0.000209187	0.000629961	yes	up	0.0133333	0.406667	0.04	0	0	0.25	0.62	0.35	TTYH1	tweety family member 1 [Source:HGNC Symbol;Acc:HGNC:13476]
ENSG00000257743	51.5455	5.68778	0.0002095	0.000630809	yes	up	0	0.103333	0	0	0	0.17	0.06	0.08	MGAM2	maltase-glucoamylase 2 (putative) [Source:HGNC Symbol;Acc:HGNC:28101]
ENSG00000261279	0.186636	-2.4217	0.0002098	0.000631528	yes	down	3.02667	0.666667	3.87	2.71	2.5	0.86	0.79	0.35	ULK4P1	ULK4 pseudogene 1 [Source:HGNC Symbol;Acc:HGNC:15775]
ENSG00000160999	3.12587	1.64426	0.000210021	0.000632101	yes	up	0.756667	1.29333	0.74	0.4	1.13	1.03	1.42	1.43	SH2B2	SH2B adaptor protein 2 [Source:HGNC Symbol;Acc:HGNC:17381]
ENSG00000138030	0.311658	-1.68197	0.000223104	0.000668919	yes	down	1.30667	0.36	1.17	1.67	1.08	0.38	0.36	0.34	KHK	ketohexokinase [Source:HGNC Symbol;Acc:HGNC:6315]
ENSG00000144130	0.277561	-1.84913	0.000225153	0.000674571	yes	down	1.2	3.38333	1.05	1.21	1.34	9.42	0.51	0.22	NT5DC4	5'-nucleotidase domain containing 4 [Source:HGNC Symbol;Acc:HGNC:27678]
ENSG00000172379	0.488944	-1.03226	0.000225986	0.000676767	yes	down	0.906667	0.556667	0.89	0.96	0.87	0.59	0.67	0.41	ARNT2	aryl hydrocarbon receptor nuclear translocator 2 [Source:HGNC Symbol;Acc:HGNC:16876]
ENSG00000125089	6.64741	2.73279	0.000226777	0.000679039	yes	up	0.11	0.773333	0.04	0.18	0.11	0.79	0.55	0.98	SH3TC1	SH3 domain and tetratricopeptide repeats 1 [Source:HGNC Symbol;Acc:HGNC:26009]
ENSG00000254402	4.78536	2.25863	0.000229456	0.000686557	yes	up	0.18	0.85	0.32	0.11	0.11	0.77	1.04	0.74	LRRC24	leucine rich repeat containing 24 [Source:HGNC Symbol;Acc:HGNC:28947]
ENSG00000101605	3.29965	1.72231	0.000237552	0.000709331	yes	up	0.15	0.886667	0.1	0.23	0.12	1.04	0.81	0.81	MYOM1	myomesin 1 [Source:HGNC Symbol;Acc:HGNC:7613]
ENSG00000260063	0.208876	-2.25928	0.000241113	0.000719441	yes	down	0.846667	0.18	0.95	0.83	0.76	0.18	0.13	0.23	AL512408.1	novel transcript, antisense to ARID1A
ENSG00000006453	0.452129	-1.14519	0.000243818	0.000727405	yes	down	1.37	0.646667	1.31	1.52	1.28	0.48	1.02	0.44	BAIAP2L1	BAI1 associated protein 2 like 1 [Source:HGNC Symbol;Acc:HGNC:21649]
ENSG00000261270	4.61271	2.20561	0.000244321	0.000728799	yes	up	1.48	5.72333	1.54	0.81	2.09	4	3.61	9.56	AC012181.2	novel transcript, sense intronic to HERPUD1
ENSG00000185100	2.86394	1.518	0.000244825	0.000730196	yes	up	0.61	2.18	0.65	0.6	0.58	2.46	1.98	2.1	ADSSL1	adenylosuccinate synthase like 1 [Source:HGNC Symbol;Acc:HGNC:20093]
ENSG00000158815	36.7192	5.19846	0.000245835	0.000733043	yes	up	0.00666667	0.453333	0.02	0	0	0.43	0.45	0.48	FGF17	fibroblast growth factor 17 [Source:HGNC Symbol;Acc:HGNC:3673]
ENSG00000109321	2.34244	1.22801	0.000245851	0.000733043	yes	up	1.94	4.59	1.15	2.09	2.58	4.15	5.17	4.45	AREG	amphiregulin [Source:HGNC Symbol;Acc:HGNC:651]
ENSG00000197766	0.456647	-1.13085	0.000248254	0.000739669	yes	down	6.78	2.39667	5.18	7.73	7.43	2.5	2.03	2.66	CFD	complement factor D [Source:HGNC Symbol;Acc:HGNC:2771]
ENSG00000246640	2.00246	1.00177	0.000248303	0.000739709	yes	up	4.51333	9.38333	4.34	5.66	3.54	8.7	10.7	8.75	PICART1	p53 inducible cancer associated RNA transcript 1 [Source:HGNC Symbol;Acc:HGNC:27576]
ENSG00000274956	0.0276955	-5.1742	0.000249951	0.000744441	yes	down	0.11	0.00333333	0.13	0.09	0.11	0.01	0	0	NKAIN3-IT1	NKAIN3 intronic transcript [Source:HGNC Symbol;Acc:HGNC:48595]
ENSG00000149591	3.11088	1.63732	0.000251552	0.000748953	yes	up	0.716667	2.13333	0.68	0.89	0.58	1.39	1.74	3.27	TAGLN	transgelin [Source:HGNC Symbol;Acc:HGNC:11553]
ENSG00000101440	3.91641	1.96953	0.000251792	0.000749556	yes	up	0.406667	1.48333	0.21	0.47	0.54	0.86	1.53	2.06	ASIP	agouti signaling protein [Source:HGNC Symbol;Acc:HGNC:745]
ENSG00000235885	36.661	5.19617	0.000252612	0.000751774	yes	up	0.00666667	0.4	0	0	0.02	0.21	0.3	0.69	LINC01828	long intergenic non-protein coding RNA 1828 [Source:HGNC Symbol;Acc:HGNC:52634]
ENSG00000166278	5.45695	2.44809	0.000252818	0.000751956	yes	up	0.196667	1.03	0.17	0.16	0.26	0.8	1.18	1.11	C2	complement C2 [Source:HGNC Symbol;Acc:HGNC:1248]
ENSG00000169994	0.201638	-2.31016	0.000256125	0.000760355	yes	down	0.886667	0.146667	1.88	0.53	0.25	0.1	0.13	0.21	MYO7B	myosin VIIB [Source:HGNC Symbol;Acc:HGNC:7607]
ENSG00000167701	2.95394	1.56264	0.000261713	0.000775931	yes	up	0.19	0.603333	0.21	0.12	0.24	0.75	0.59	0.47	GPT	glutamic--pyruvic transaminase [Source:HGNC Symbol;Acc:HGNC:4552]
ENSG00000233254	3.55938	1.83163	0.000270112	0.000799676	yes	up	14.79	55.4833	23.13	12.14	9.1	77.59	50.34	38.52	RPL21P134	ribosomal protein L21 pseudogene 134 [Source:HGNC Symbol;Acc:HGNC:36006]
ENSG00000197410	0.495901	-1.01187	0.000272004	0.000805045	yes	down	0.753333	0.566667	0.68	0.69	0.89	1.12	0.28	0.3	DCHS2	dachsous cadherin-related 2 [Source:HGNC Symbol;Acc:HGNC:23111]
ENSG00000286078	49.0567	5.61638	0.000275232	0.000813777	yes	up	0	0.716667	0	0	0	0.69	0.97	0.49	AL391056.2	novel transcript
ENSG00000118242	2.45728	1.29706	0.000275284	0.000813812	yes	up	1.20333	2.95	0.53	1.33	1.75	1.84	2.62	4.39	MREG	melanoregulin [Source:HGNC Symbol;Acc:HGNC:25478]
ENSG00000268790	0.363291	-1.4608	0.000280318	0.000827499	yes	down	16.31	6.19667	18.3	12.17	18.46	6.01	6.93	5.65	AC008764.4	novel protein
ENSG00000170412	16.8056	4.07087	0.000280854	0.000828963	yes	up	0.05	0.62	0	0.15	0	0.55	0.37	0.94	GPRC5C	G protein-coupled receptor class C group 5 member C [Source:HGNC Symbol;Acc:HGNC:13309]
ENSG00000136859	0.379611	-1.39741	0.000283899	0.000837469	yes	down	1.41333	0.663333	2.46	0.85	0.93	0.31	1.23	0.45	ANGPTL2	angiopoietin like 2 [Source:HGNC Symbol;Acc:HGNC:490]
ENSG00000172216	2.14032	1.09782	0.000290467	0.000855486	yes	up	45.7833	91.6467	35.82	40.27	61.26	78.47	91.69	104.78	CEBPB	CCAAT enhancer binding protein beta [Source:HGNC Symbol;Acc:HGNC:1834]
ENSG00000144331	0.140972	-2.82652	0.000290666	0.000855827	yes	down	0.733333	0.216667	1.4	0.38	0.42	0.42	0.18	0.05	ZNF385B	zinc finger protein 385B [Source:HGNC Symbol;Acc:HGNC:26332]
ENSG00000232748	0.18517	-2.43308	0.000290634	0.000855827	yes	down	0.44	0.0766667	0.43	0.47	0.42	0.07	0.13	0.03	AC135050.1	novel transcript, antisense to ZNF668
ENSG00000157554	0.282207	-1.82518	0.000295831	0.000870284	yes	down	0.896667	0.276667	1.06	1.03	0.6	0.36	0.37	0.1	ERG	ETS transcription factor ERG [Source:HGNC Symbol;Acc:HGNC:3446]
ENSG00000249767	2.33779	1.22514	0.000298873	0.000878728	yes	up	11.62	27.5567	11.05	11.75	12.06	25.12	26.8	30.75	ENPP7P10	ectonucleotide pyrophosphatase/phosphodiesterase 7 pseudogene 10 [Source:HGNC Symbol;Acc:HGNC:48693]
ENSG00000135324	0.145252	-2.78337	0.000300251	0.0008824	yes	down	0.64	0.0966667	0.44	0.85	0.63	0.17	0.03	0.09	MRAP2	melanocortin 2 receptor accessory protein 2 [Source:HGNC Symbol;Acc:HGNC:21232]
ENSG00000176928	2.25573	1.17359	0.000310243	0.000910718	yes	up	0.386667	0.793333	0.36	0.4	0.4	0.91	0.77	0.7	GCNT4	glucosaminyl (N-acetyl) transferase 4 [Source:HGNC Symbol;Acc:HGNC:17973]
ENSG00000184619	3.12593	1.64429	0.000315751	0.000925958	yes	up	0.34	1.07667	0.45	0.2	0.37	0.92	1	1.31	KRBA2	KRAB-A domain containing 2 [Source:HGNC Symbol;Acc:HGNC:26989]
ENSG00000101445	0.386126	-1.37286	0.000316718	0.000928397	yes	down	0.5	0.196667	0.48	0.56	0.46	0.23	0.15	0.21	PPP1R16B	protein phosphatase 1 regulatory subunit 16B [Source:HGNC Symbol;Acc:HGNC:15850]
ENSG00000148677	0.49702	-1.00863	0.000325526	0.000953395	yes	down	3.55	1.79333	4.26	3.25	3.14	1.49	1.42	2.47	ANKRD1	ankyrin repeat domain 1 [Source:HGNC Symbol;Acc:HGNC:15819]
ENSG00000142178	53.5586	5.74305	0.00032635	0.000955674	yes	up	0	0.76	0	0	0	0.21	0.66	1.41	SIK1	salt inducible kinase 1 [Source:HGNC Symbol;Acc:HGNC:11142]
ENSG00000182752	2.00623	1.00449	0.000336198	0.000982965	yes	up	0.266667	0.66	0.37	0.23	0.2	0.64	0.73	0.61	PAPPA	pappalysin 1 [Source:HGNC Symbol;Acc:HGNC:8602]
ENSG00000197301	0.341042	-1.55198	0.000341825	0.000997707	yes	down	0.98	0.383333	0.89	1.02	1.03	0.51	0.47	0.17	HMGA2-AS1	HMGA2 antisense RNA 1 [Source:HGNC Symbol;Acc:HGNC:53973]
ENSG00000272899	7.33807	2.8754	0.000342359	0.000998857	yes	up	0.04	0.306667	0.04	0.01	0.07	0.31	0.39	0.22	ATP6V1FNB	ATP6V1F neighbor [Source:HGNC Symbol;Acc:HGNC:52392]
ENSG00000130300	3.84161	1.94171	0.000342365	0.000998857	yes	up	0.286667	0.893333	0.52	0.18	0.16	1.01	0.81	0.86	PLVAP	plasmalemma vesicle associated protein [Source:HGNC Symbol;Acc:HGNC:13635]
ENSG00000119737	2.12302	1.08612	0.000344745	0.00100523	yes	up	1.42333	3.09667	1.44	1.98	0.85	3.23	2.52	3.54	GPR75	G protein-coupled receptor 75 [Source:HGNC Symbol;Acc:HGNC:4526]
ENSG00000130487	23.4873	4.55381	0.00034564	0.00100755	yes	up	0.0133333	0.22	0.04	0	0	0.2	0.22	0.24	KLHDC7B	kelch domain containing 7B [Source:HGNC Symbol;Acc:HGNC:25145]
ENSG00000260456	0.378686	-1.40093	0.000345916	0.00100807	yes	down	4.23	1.49333	4.04	4.31	4.34	1.4	1.4	1.68	C16orf95	chromosome 16 open reading frame 95 [Source:HGNC Symbol;Acc:HGNC:40033]
ENSG00000163596	0.370423	-1.43276	0.000346449	0.00100948	yes	down	8.44333	0.386667	1.18	1.37	22.78	0.15	0.25	0.76	ICA1L	islet cell autoantigen 1 like [Source:HGNC Symbol;Acc:HGNC:14442]
ENSG00000263004	2.2413	1.16434	0.000359977	0.00104696	yes	up	4.02333	8.39667	3.15	4.58	4.34	9.09	7.21	8.89	AC007114.1	novel transcript
ENSG00000125810	0.260173	-1.94246	0.000362032	0.00105249	yes	down	0.26	0.07	0.29	0.25	0.24	0.06	0.06	0.09	CD93	CD93 molecule [Source:HGNC Symbol;Acc:HGNC:15855]
ENSG00000166035	2.15671	1.10883	0.000362961	0.00105504	yes	up	1.39	2.14667	1.19	1.3	1.68	1.76	2.48	2.2	LIPC	lipase C, hepatic type [Source:HGNC Symbol;Acc:HGNC:6619]
ENSG00000280320	0.25114	-1.99344	0.000367539	0.00106774	yes	down	20.4733	5.43333	27.49	18.77	15.16	7.33	1.53	7.44	AC025262.3	novel transcript
ENSG00000258057	2.23194	1.1583	0.000372791	0.00108268	yes	up	0.786667	1.42333	0.51	0.76	1.09	2	0.92	1.35	BCDIN3D-AS1	BCDIN3D antisense RNA 1 [Source:HGNC Symbol;Acc:HGNC:44113]
ENSG00000198121	0.465567	-1.10294	0.000376404	0.00109226	yes	down	1.53667	0.88	1.47	1.77	1.37	0.67	0.57	1.4	LPAR1	lysophosphatidic acid receptor 1 [Source:HGNC Symbol;Acc:HGNC:3166]
ENSG00000108370	2.00554	1.00399	0.000377078	0.00109406	yes	up	1.13333	2.70667	1.22	1.23	0.95	2.15	3.51	2.46	RGS9	regulator of G protein signaling 9 [Source:HGNC Symbol;Acc:HGNC:10004]
ENSG00000124713	3.02464	1.59676	0.000380014	0.00110242	yes	up	0.506667	0.796667	0.14	0.49	0.89	0.84	0.7	0.85	GNMT	glycine N-methyltransferase [Source:HGNC Symbol;Acc:HGNC:4415]
ENSG00000077327	0.347473	-1.52503	0.00038073	0.00110434	yes	down	0.97	0.37	1.19	0.87	0.85	0.48	0.29	0.34	SPAG6	sperm associated antigen 6 [Source:HGNC Symbol;Acc:HGNC:11215]
ENSG00000258559	3.03963	1.60389	0.000383569	0.00111163	yes	up	0.75	2.31667	0.83	0.94	0.48	1.8	1.96	3.19	AC005519.1	novel transcript, sense overlapping ABCD4
ENSG00000261379	6.8382	2.77362	0.000413627	0.00119586	yes	up	0.223333	1.53333	0.25	0.07	0.35	2.05	0.9	1.65	AC010735.1	novel transcript
ENSG00000232445	0.196403	-2.34811	0.000417938	0.0012073	yes	down	3.28333	0.646667	2.9	4.38	2.57	0.14	0.91	0.89	AC006329.1	novel transcript
ENSG00000214300	0.28791	-1.79631	0.000418453	0.00120862	yes	down	1.14333	0.336667	1.43	0.83	1.17	0.32	0.38	0.31	SPDYE3	speedy/RINGO cell cycle regulator family member E3 [Source:HGNC Symbol;Acc:HGNC:35462]
ENSG00000134321	45.4921	5.50754	0.000427776	0.00123451	yes	up	0	0.15	0	0	0	0.18	0.16	0.11	RSAD2	radical S-adenosyl methionine domain containing 2 [Source:HGNC Symbol;Acc:HGNC:30908]
ENSG00000198754	0.183499	-2.44616	0.000429025	0.00123724	yes	down	0.943333	0.176667	0.84	1.18	0.81	0.27	0	0.26	OXCT2	3-oxoacid CoA-transferase 2 [Source:HGNC Symbol;Acc:HGNC:18606]
ENSG00000163141	3.48701	1.80199	0.000432028	0.00124485	yes	up	0.47	1.21667	0.69	0.43	0.29	1.35	1.08	1.22	BNIPL	BCL2 interacting protein like [Source:HGNC Symbol;Acc:HGNC:16976]
ENSG00000205002	0.470704	-1.08711	0.000433193	0.00124785	yes	down	2.24	0.953333	2.78	1.88	2.06	0.83	0.98	1.05	AARD	alanine and arginine rich domain containing protein [Source:HGNC Symbol;Acc:HGNC:33842]
ENSG00000119698	0.461381	-1.11597	0.00043846	0.00126178	yes	down	1.53333	0.793333	1.67	1.4	1.53	0.6	0.69	1.09	PPP4R4	protein phosphatase 4 regulatory subunit 4 [Source:HGNC Symbol;Acc:HGNC:23788]
ENSG00000266651	0.277131	-1.85136	0.000446258	0.00128278	yes	down	2.29333	0.646667	2.58	1.7	2.6	0.64	0.58	0.72	AC093484.4	novel transcript
ENSG00000279196	3.19567	1.67612	0.000446464	0.00128319	yes	up	0.2	0.63	0.13	0.19	0.28	0.61	0.64	0.64	AC135048.4	novel transcript
ENSG00000261114	3.29944	1.72222	0.000470022	0.00134768	yes	up	1.63667	5.26	0.7	2.02	2.19	5.77	4.23	5.78	AC012181.1	novel transcript, sense intronic to HERPUD1
[truncated: 681 more rows]
